# Supplementary material
Source: PubMed Central journal article supplement (PMC5864127)
Supplement: NIHMS914744-supplement-Supplemental_Material.pdf [file NIHMS914744-supplement-Supplemental_Material.pdf]

## **SUPPLEMENTAL MATERIAL**

A. AAA formation study:

Groups:

- 1. XY males (sham)    2. XX males (sham)
- 3. XY males (ORC)    4. XX males (ORC)

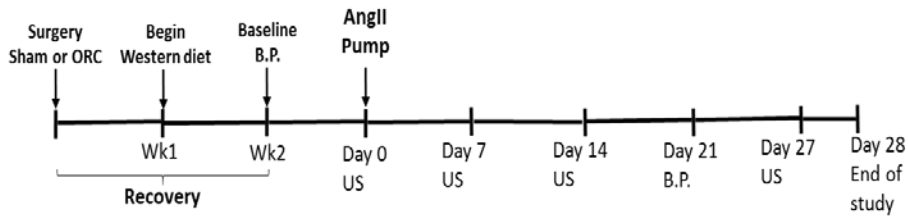

B. AAA Progression study:

Groups:

- 1. XY males (intact)    2. XX males (intact)

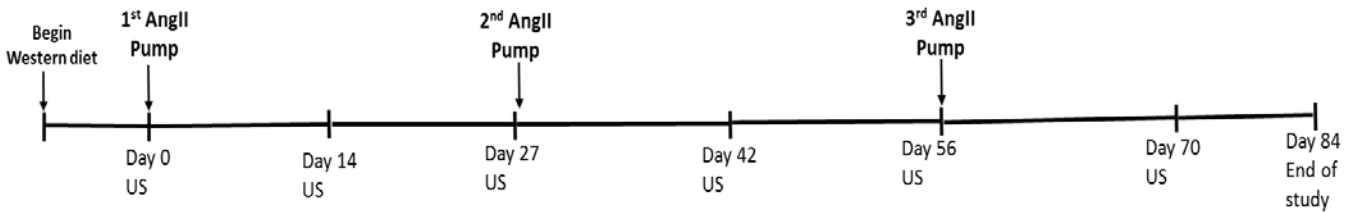

Supplemental Figure I. Graphic depiction of experimental design for studies focused on the formation (A) versus the progression (B) of AngII-induced AAAs.

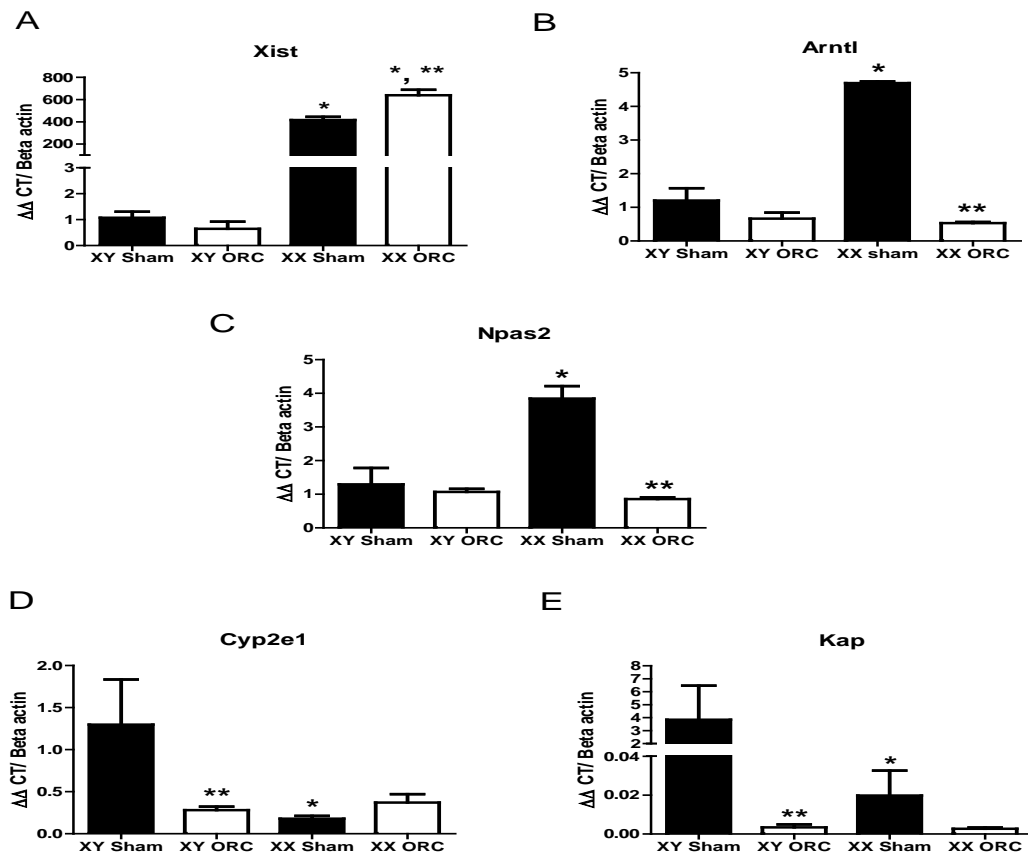

Supplemental Figure II. RT-PCR analysis of mRNA abundance of key genes in abdominal aortas from male XY and XX mice (sham, orchiectomized, ORC). A-C, mRNA abundance of genes (A, *Xist*; B, *Arntl*; C, *Npas2*) exhibiting increased expression in gene arrays from abdominal aortas of XY compared to XX male mice. D, E, mRNA abundance of genes (D, *Cyp2e1*; E, *Kap*) exhibiting increased expression in gene arrays from abdominal aortas of XY compared to XX male mice. Data are mean  $\pm$  SEM from  $n = 4-5$  mice/group. \*,  $P < 0.05$  compared to XY within surgical group as defined by two-way ANOVA with genotype and surgery as between group factors. \*\*,  $P < 0.05$  compared to sham-operated within genotype as defined by two-way ANOVA with surgery and genotype as between group factors and Holm-Sidak post hoc analysis.

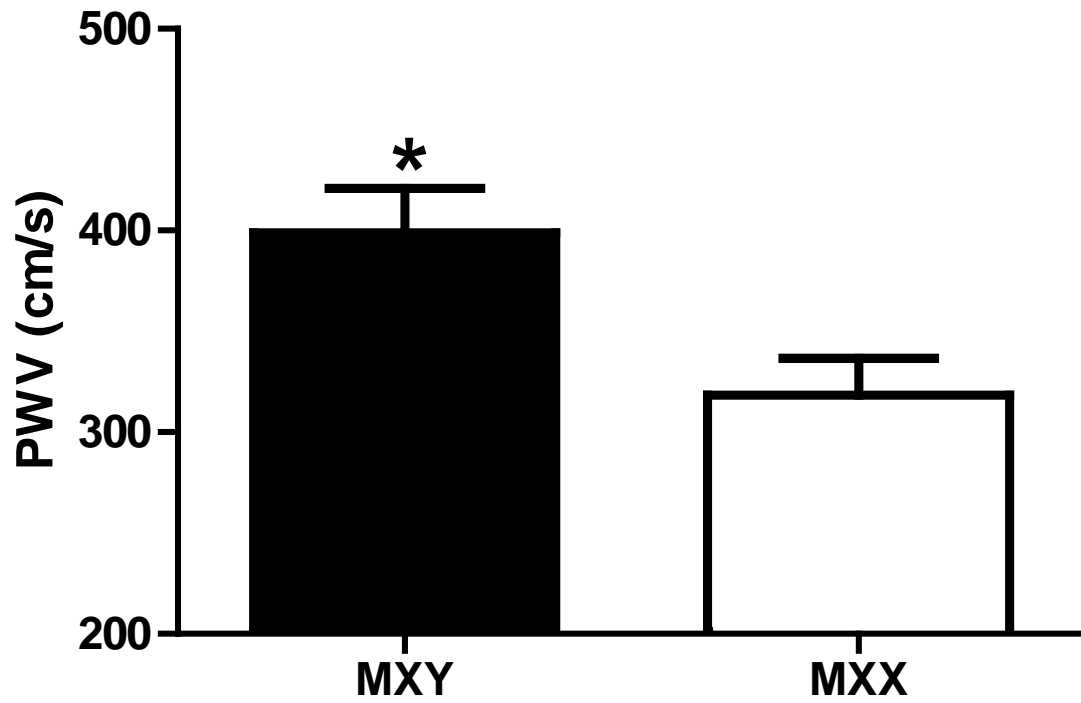

Supplemental Figure III. Pulse Wave Velocity (PWV) from male XY and XX *Ldlr*<sup>-/-</sup> mice. Data are mean  $\pm$  SEM from n = 6 mice/group. \*, P<0.05 compared to XY as defined by Student's t-test.

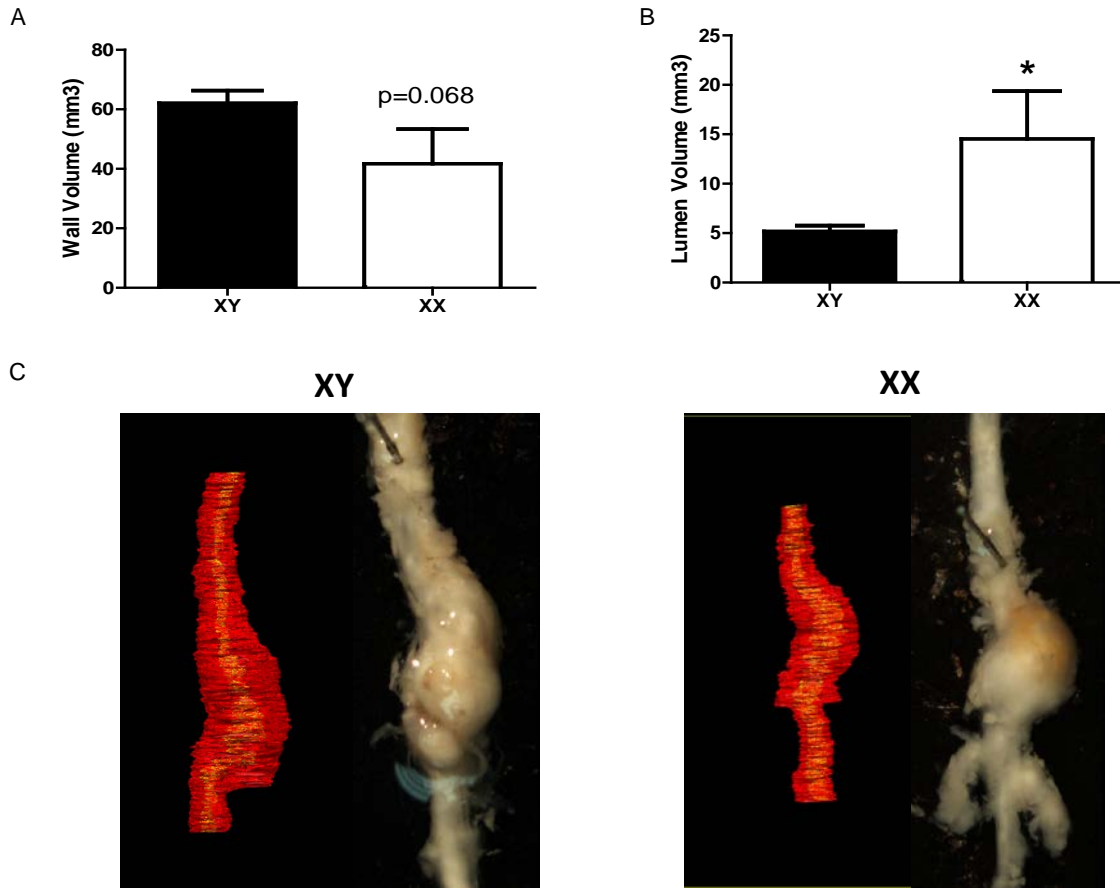

Supplemental Figure IV. Ex vivo ultrasound analysis of AAAs from XY and XX male mice infused with AngII for 3 months. A, Wall volume. B, Abdominal aortic lumen volume. C, Representative 3-D reconstructions of AAAs of mice from each genotype. Data are mean  $\pm$  n = 5 mice/group that survived the study protocol. \*,  $P < 0.05$  compared to XY as defined by Student's t-test.

Supplemental Table I

| Probe Set ID      | Symbol                   | Annotations<br>Description                                       | Summary Statistics |              |              |              | 2 way ANOVA p-values |          |         |
|-------------------|--------------------------|------------------------------------------------------------------|--------------------|--------------|--------------|--------------|----------------------|----------|---------|
|                   |                          |                                                                  | XY sh              | XY Or        | XX sh        | XX Or        | XY vs XX             | Sh vs Or | Intrxn  |
| TC0800001327.mm.1 | <a href="#">Aars</a>     | alanyl-tRNA synthetase                                           | 7.49 ± 0.02        | 7.39 ± 0.02  | 7.38 ± 0.02  | 7.36 ± 0.02  | 0.00272              | 0.00377  | 0.05425 |
| TC1100004000.mm.1 | <a href="#">Abca9</a>    | ATP-binding cassette, sub-family A (ABC1), member 9              | 8.36 ± 0.07        | 8.06 ± 0.04  | 8.22 ± 0.06  | 7.93 ± 0.11  | 0.17682              | 0.00315  | 0.75664 |
| TC0100002601.mm.1 | <a href="#">Abcb6</a>    | ATP-binding cassette, sub-family B (MDR/TAP), member 6           | 6.24 ± 0.05        | 6.08 ± 0.05  | 6.04 ± 0.04  | 6.19 ± 0.03  | 0.25045              | 0.79884  | 0.00306 |
| TC1400002714.mm.1 | <a href="#">Abcc4</a>    | ATP-binding cassette, sub-family C (CFTR/MRP), member 4          | 7.14 ± 0.08        | 6.83 ± 0.06  | 6.92 ± 0.06  | 7.06 ± 0.02  | 0.7407               | 0.10789  | 0.00188 |
| TC0500002085.mm.1 | <a href="#">Abcf2</a>    | ATP-binding cassette, sub-family F (GCN20), member 2             | 8.55 ± 0.03        | 8.51 ± 0.04  | 8.37 ± 0.04  | 8.35 ± 0.05  | 0.00095              | 0.66706  | 0.97799 |
| TC0800000073.mm.1 | <a href="#">Abhd13</a>   | abhydrolase domain containing 13                                 | 7.34 ± 0.05        | 7.39 ± 0.04  | 7.33 ± 0     | 7.17 ± 0.03  | 0.00388              | 0.10663  | 0.02156 |
| TC0900001348.mm.1 | <a href="#">Abhd14b</a>  | abhydrolase domain containing 14b                                | 7.92 ± 0.03        | 8.04 ± 0.07  | 8.17 ± 0.03  | 8.15 ± 0.02  | 0.00079              | 0.25826  | 0.11373 |
| TC1100001127.mm.1 | <a href="#">Abhd15</a>   | abhydrolase domain containing 15                                 | 7.08 ± 0.13        | 6.66 ± 0.15  | 6.54 ± 0.15  | 7.05 ± 0.05  | 0.35942              | 0.9749   | 0.00189 |
| TC0900001638.mm.1 | <a href="#">Abhd5</a>    | abhydrolase domain containing 5                                  | 8.66 ± 0.11        | 8.33 ± 0.09  | 8.01 ± 0.12  | 8.4 ± 0.05   | 0.01013              | 0.8602   | 0.00306 |
| TC1900001711.mm.1 | <a href="#">Ablim1</a>   | actin-binding LIM protein 1                                      | 7.43 ± 0.03        | 7.38 ± 0     | 7.3 ± 0.03   | 7.4 ± 0.01   | 0.0193               | 0.51627  | 0.00253 |
| TC0600000572.mm.1 | <a href="#">Abp1</a>     | amiloride binding protein 1 (amine oxidase, copper-containing)   | 4.6 ± 0.03         | 4.75 ± 0.04  | 4.58 ± 0.04  | 4.73 ± 0.06  | 0.76206              | 0.00328  | 0.99043 |
| TC1500001446.mm.1 | <a href="#">Abra</a>     | actin-binding Rho activating protein                             | 6.74 ± 0.19        | 7.45 ± 0.12  | 7.35 ± 0.21  | 6.81 ± 0.11  | 0.82783              | 0.72033  | 0.00317 |
| TC0200001535.mm.1 | <a href="#">Abtb2</a>    | ankyrin repeat and BTB (POZ) domain containing 2                 | 7.48 ± 0.14        | 7.65 ± 0.04  | 7.99 ± 0.09  | 7.45 ± 0.05  | 0.14003              | 0.09297  | 0.0031  |
| TC0900003334.mm.1 | <a href="#">Acad11</a>   | acyl-Coenzyme A dehydrogenase family, member 11                  | 8.3 ± 0.2          | 8.17 ± 0.21  | 7.64 ± 0.25  | 8.64 ± 0.1   | 0.36463              | 0.11266  | 0.00598 |
| TC1100003073.mm.1 | <a href="#">Acap1</a>    | ArfGAP with coiled-coil, ankyrin repeat and PH domains 1         | 5.23 ± 0.03        | 5.46 ± 0.03  | 5.35 ± 0.04  | 5.54 ± 0.08  | 0.08933              | 0.0008   | 0.81482 |
| TC1100001767.mm.1 | <a href="#">Ace</a>      | angiotensin I converting enzyme (peptidyl-dipeptidase A) 1       | 10.49 ± 0.13       | 10.1 ± 0.07  | 10.66 ± 0.07 | 9.84 ± 0.11  | 0.93978              | 0.00014  | 0.03487 |
| TSUnmapped000000  | <a href="#">Ache</a>     | acetylcholinesterase (Ache), transcript variant 1, mRNA.         | 8.2 ± 0.79         | 6.68 ± 0.47  | 5.59 ± 0.25  | 8.08 ± 0.33  | 0.42883              | 0.27989  | 0.00549 |
| TC1200000798.mm.1 | <a href="#">Acot1</a>    | acyl-CoA thioesterase 1                                          | 6.6 ± 0.09         | 6.74 ± 0.1   | 6.41 ± 0.11  | 7.04 ± 0.14  | 0.85238              | 0.0061   | 0.02299 |
| TC1200000799.mm.1 | <a href="#">Acot4</a>    | acyl-CoA thioesterase 4                                          | 5.04 ± 0.1         | 5.3 ± 0.11   | 4.88 ± 0.07  | 5.36 ± 0.08  | 0.36976              | 0.00457  | 0.14077 |
| TC1100004107.mm.1 | <a href="#">Acox1</a>    | acyl-Coenzyme A oxidase 1, palmitoyl                             | 9.7 ± 0.13         | 9.47 ± 0.17  | 9.17 ± 0.19  | 9.9 ± 0.05   | 0.49443              | 0.21431  | 0.00277 |
| TC0900001900.mm.1 | <a href="#">Acp5</a>     | acid phosphatase 5, tartrate resistant                           | 9.03 ± 0.12        | 8.78 ± 0.12  | 8.64 ± 0.12  | 9.11 ± 0.08  | 0.49532              | 0.57734  | 0.00345 |
| TC0900002889.mm.1 | <a href="#">Acpl2</a>    | acid phosphatase-like 2                                          | 5.84 ± 0.05        | 5.96 ± 0.02  | 6.03 ± 0.05  | 5.89 ± 0.01  | 0.09418              | 0.98064  | 0.00382 |
| TC0800000538.mm.1 | <a href="#">Acsl1</a>    | acyl-CoA synthetase long-chain family member 1                   | 11.55 ± 0.12       | 11.29 ± 0.17 | 10.68 ± 0.25 | 11.61 ± 0.06 | 0.06472              | 0.09771  | 0.00149 |
| TC1000002814.mm.1 | <a href="#">Acss3</a>    | acyl-CoA synthetase short-chain family member 3                  | 8.01 ± 0.24        | 7.34 ± 0.27  | 7.25 ± 0.26  | 7.85 ± 0.11  | 0.36745              | 0.60279  | 0.00803 |
| TC0200003576.mm.1 | <a href="#">Acvr1c</a>   | activin A receptor, type IC                                      | 7.79 ± 0.19        | 7.23 ± 0.2   | 7.01 ± 0.18  | 7.47 ± 0.03  | 0.08455              | 0.56857  | 0.00636 |
| TC0200005097.mm.1 | <a href="#">Ada</a>      | adenosine deaminase                                              | 6.28 ± 0.06        | 6.47 ± 0.06  | 6.54 ± 0.06  | 6.39 ± 0.05  | 0.12204              | 0.69859  | 0.00965 |
| TC0700004431.mm.1 | <a href="#">Adam12</a>   | a disintegrin and metallopeptidase domain 12 (meltrin alpha)     | 6.69 ± 0.12        | 6.47 ± 0.08  | 6.24 ± 0.11  | 6.69 ± 0.14  | 0.1952               | 0.58934  | 0.00589 |
| TC0300002348.mm.1 | <a href="#">Adam15</a>   | a disintegrin and metallopeptidase domain 15 (metargidin)        | 7.96 ± 0.04        | 7.85 ± 0.02  | 8 ± 0.04     | 7.83 ± 0.02  | 0.62531              | 0.00109  | 0.27884 |
| TC1200001490.mm.1 | <a href="#">Adam17</a>   | a disintegrin and metallopeptidase domain 17                     | 7.9 ± 0.03         | 7.82 ± 0.06  | 7.89 ± 0.02  | 7.72 ± 0.04  | 0.14553              | 0.00644  | 0.31287 |
| TC0800001901.mm.1 | <a href="#">Adam9</a>    | a disintegrin and metallopeptidase domain 9 (meltrin gamma)      | 9.76 ± 0.07        | 9.63 ± 0.02  | 9.7 ± 0.04   | 9.37 ± 0.07  | 0.01443              | 0.00114  | 0.09377 |
| TC1600001974.mm.1 | <a href="#">Adamts1</a>  | a disintegrin-like and metallopeptidase (reprolysin type) with t | 9.13 ± 0.2         | 9.6 ± 0.15   | 8.77 ± 0.12  | 8.69 ± 0.16  | 0.00329              | 0.21974  | 0.10093 |
| TC1500000090.mm.1 | <a href="#">Adamts12</a> | a disintegrin-like and metallopeptidase (reprolysin type) with t | 7.41 ± 0.07        | 6.93 ± 0.06  | 7.12 ± 0.04  | 6.83 ± 0.09  | 0.01294              | 7.1E-05  | 0.17517 |

Supplemental Table I

| Probe Set ID      | Symbol                   | Annotations<br>Description                                       | Summary Statistics |              |              |              | 2 way ANOVA p-values |          |         |
|-------------------|--------------------------|------------------------------------------------------------------|--------------------|--------------|--------------|--------------|----------------------|----------|---------|
|                   |                          |                                                                  | XY sh              | XY Or        | XX sh        | XX Or        | XY vs XX             | Sh vs Or | Intrxn  |
| TC0900001973.mm.1 | <a href="#">Adamts15</a> | a disintegrin-like and metallopeptidase (reprolysin type) with t | 7.57 ± 0.15        | 7.41 ± 0.12  | 7.75 ± 0.11  | 6.98 ± 0.15  | 0.53718              | 0.00861  | 0.02614 |
| TC1100000547.mm.1 | <a href="#">Adamts2</a>  | a disintegrin-like and metallopeptidase (reprolysin type) with t | 9.85 ± 0.11        | 9.58 ± 0.03  | 9.83 ± 0.07  | 9.22 ± 0.11  | 0.11031              | 0.00064  | 0.04492 |
| TC1600001976.mm.1 | <a href="#">Adamts5</a>  | a disintegrin-like and metallopeptidase (reprolysin type) with t | 9.16 ± 0.1         | 8.85 ± 0.05  | 9.65 ± 0.08  | 8.83 ± 0.13  | 0.04451              | 3.8E-05  | 0.02943 |
| TC0600002756.mm.1 | <a href="#">Adamts9</a>  | a disintegrin-like and metallopeptidase (reprolysin type) with t | 7.57 ± 0.06        | 7.56 ± 0.12  | 7.13 ± 0.04  | 7.29 ± 0.03  | 0.00015              | 0.43745  | 0.16705 |
| TC1000002497.mm.1 | <a href="#">Adamtsl5</a> | ADAMTS-like 5                                                    | 7.49 ± 0.08        | 7.77 ± 0.04  | 7.84 ± 0.08  | 7.64 ± 0.03  | 0.12609              | 0.5152   | 0.0034  |
| TC1100001196.mm.1 | <a href="#">Adap2</a>    | ArfGAP with dual PH domains 2                                    | 7.46 ± 0.09        | 7.02 ± 0.11  | 7.21 ± 0.04  | 7.01 ± 0.08  | 0.25757              | 0.00554  | 0.3019  |
| TC0100000039.mm.1 | <a href="#">Adhfe1</a>   | alcohol dehydrogenase, iron containing, 1                        | 8.13 ± 0.16        | 7.79 ± 0.17  | 7.55 ± 0.19  | 8.24 ± 0.04  | 0.42315              | 0.51418  | 0.00234 |
| TC1600000331.mm.1 | <a href="#">Adipoq</a>   | adiponectin, C1Q and collagen domain containing                  | 9.07 ± 0.12        | 8.65 ± 0.18  | 8.45 ± 0.18  | 9 ± 0.06     | 0.25456              | 0.77357  | 0.0028  |
| TC0600003017.mm.1 | <a href="#">Adipor2</a>  | adiponectin receptor 2                                           | 9.71 ± 0.13        | 9.38 ± 0.17  | 9.04 ± 0.19  | 9.59 ± 0.03  | 0.07335              | 0.68299  | 0.00453 |
| TC0900000746.mm.1 | <a href="#">Adpgk</a>    | ADP-dependent glucokinase                                        | 7.22 ± 0.06        | 7.33 ± 0.01  | 7.17 ± 0.06  | 7.06 ± 0.04  | 0.00996              | 0.81094  | 0.03493 |
| TC0200004660.mm.1 | <a href="#">Adra1d</a>   | adrenergic receptor, alpha 1d                                    | 8.16 ± 0.08        | 8.5 ± 0.07   | 8.41 ± 0.03  | 8.32 ± 0.02  | 0.66608              | 0.07652  | 0.00555 |
| TC0800001955.mm.1 | <a href="#">Adrb3</a>    | adrenergic receptor, beta 3                                      | 7.71 ± 0.14        | 7.21 ± 0.23  | 7.11 ± 0.22  | 7.74 ± 0.1   | 0.5986               | 0.98298  | 0.00396 |
| TC1300001868.mm.1 | <a href="#">Adtrp</a>    | androgen dependent TFPI regulating protein                       | 7.27 ± 0.18        | 6.86 ± 0.21  | 6.38 ± 0.27  | 7.47 ± 0.13  | 0.31208              | 0.21738  | 0.00133 |
| TC1000000903.mm.1 | <a href="#">Aes</a>      | amino-terminal enhancer of split                                 | 10.99 ± 0.03       | 11.02 ± 0.02 | 11.11 ± 0.02 | 11.09 ± 0.03 | 0.00485              | 0.82482  | 0.46693 |
| TC0500000303.mm.1 | <a href="#">Aqbl5</a>    | ATP/GTP binding protein-like 5                                   | 5.76 ± 0.01        | 5.89 ± 0.01  | 5.87 ± 0.01  | 5.93 ± 0.04  | 0.0072               | 0.00103  | 0.13473 |
| TC1500001689.mm.1 | <a href="#">Ago2</a>     | argonaute RISC catalytic subunit 2                               | 8.93 ± 0.05        | 8.93 ± 0.02  | 8.82 ± 0.03  | 8.72 ± 0.07  | 0.00732              | 0.37346  | 0.28099 |
| TC0800001883.mm.1 | <a href="#">Acpat6</a>   | 1-acylglycerol-3-phosphate O-acyltransferase 6 (lysophospha      | 8.75 ± 0.13        | 8.58 ± 0.14  | 8.18 ± 0.12  | 8.74 ± 0.1   | 0.06674              | 0.25133  | 0.0062  |
| TC0500000987.mm.1 | <a href="#">Acpat9</a>   | 1-acylglycerol-3-phosphate O-acyltransferase 9                   | 7.34 ± 0.08        | 6.99 ± 0.13  | 6.85 ± 0.05  | 7.06 ± 0.02  | 0.0157               | 0.33909  | 0.00281 |
| TC0900000666.mm.1 | <a href="#">Acpht1</a>   | aminoglycoside phosphotransferase domain containing 1            | 5.47 ± 0.04        | 5.29 ± 0.04  | 5.49 ± 0.05  | 5.25 ± 0.11  | 0.91289              | 0.00871  | 0.49501 |
| TC1100002364.mm.1 | <a href="#">Ahsa2</a>    | AHA1, activator of heat shock protein ATPase 2                   | 7.22 ± 0.09        | 7.28 ± 0.09  | 6.98 ± 0.04  | 7.01 ± 0.03  | 0.00646              | 0.50009  | 0.74899 |
| TC0300003147.mm.1 | <a href="#">Ak5</a>      | adenylate kinase 5                                               | 5.57 ± 0.03        | 5.79 ± 0.04  | 5.65 ± 0.02  | 5.63 ± 0.04  | 0.31237              | 0.00486  | 0.00129 |
| TC0300001154.mm.1 | <a href="#">Aknad1</a>   | AKNA domain containing 1                                         | 6.04 ± 0.16        | 6.41 ± 0.07  | 6.61 ± 0.1   | 6.18 ± 0.1   | 0.22906              | 0.71271  | 0.00718 |
| TC1300001377.mm.1 | <a href="#">Akr1c18</a>  | aldo-keto reductase family 1, member C18                         | 4.52 ± 0.08        | 4.77 ± 0.02  | 4.5 ± 0.06   | 4.9 ± 0.15   | 0.81685              | 0.00757  | 0.26377 |
| TC1900000335.mm.1 | <a href="#">Aldh1a1</a>  | aldehyde dehydrogenase family 1, subfamily A1                    | 9.24 ± 0.16        | 8.6 ± 0.1    | 9.04 ± 0.05  | 8.47 ± 0.18  | 0.3102               | 0.00092  | 0.90029 |
| TC0900000950.mm.1 | <a href="#">Aldh1a2</a>  | aldehyde dehydrogenase family 1, subfamily A2                    | 5.87 ± 0.05        | 5.82 ± 0.04  | 5.88 ± 0.05  | 5.59 ± 0.02  | 0.02939              | 0.00298  | 0.01998 |
| TC1200002078.mm.1 | <a href="#">Aldh6a1</a>  | aldehyde dehydrogenase family 6, subfamily A1                    | 10 ± 0.15          | 9.79 ± 0.13  | 9.7 ± 0.14   | 10.16 ± 0.03 | 0.87046              | 0.59877  | 0.00814 |
| TC1600001349.mm.1 | <a href="#">Alg3</a>     | asparagine-linked glycosylation 3 (alpha-1,3-mannosyltransfe     | 7.41 ± 0.02        | 7.28 ± 0.04  | 7.24 ± 0.04  | 7.24 ± 0.04  | 0.00616              | 0.03622  | 0.04778 |
| TC0500001599.mm.1 | <a href="#">Alkbh4</a>   | alkB, alkylation repair homolog 4 (E. coli)                      | 6.7 ± 0.01         | 6.8 ± 0.01   | 6.79 ± 0.01  | 6.81 ± 0.03  | 0.01148              | 0.00989  | 0.0496  |
| TC0700000558.mm.1 | <a href="#">Alkbh6</a>   | alkB, alkylation repair homolog 6 (E. coli)                      | 6.19 ± 0.03        | 6.3 ± 0      | 6.35 ± 0.02  | 6.32 ± 0.01  | 0.00283              | 0.36273  | 0.01962 |
| TC0600002975.mm.1 | <a href="#">Alox5</a>    | arachidonate 5-lipoxygenase                                      | 6.05 ± 0.04        | 5.94 ± 0.03  | 6.03 ± 0.03  | 5.91 ± 0.03  | 0.66271              | 0.00786  | 0.67528 |
| TC0500001844.mm.1 | <a href="#">Alox5ap</a>  | arachidonate 5-lipoxygenase activating protein                   | 8.54 ± 0.08        | 8.29 ± 0.1   | 8.39 ± 0.04  | 7.95 ± 0.08  | 0.01395              | 0.00097  | 0.14748 |
| TC1500000087.mm.1 | <a href="#">Amacr</a>    | alpha-methylacyl-CoA racemase                                    | 6.92 ± 0.08        | 6.81 ± 0.04  | 6.77 ± 0.06  | 7.02 ± 0.04  | 0.97915              | 0.54471  | 0.00398 |

Supplemental Table I

| Probe Set ID      | Symbol                    | Annotations<br>Description                                   | Summary Statistics |             |             |             | 2 way ANOVA p-values |          |         |
|-------------------|---------------------------|--------------------------------------------------------------|--------------------|-------------|-------------|-------------|----------------------|----------|---------|
|                   |                           |                                                              | XY sh              | XY Or       | XX sh       | XX Or       | XY vs XX             | Sh vs Or | Intrxn  |
| TC1000002003.mm.1 | <a href="#">Amd2</a>      | S-adenosylmethionine decarboxylase 2                         | 6.8 ± 0.04         | 6.81 ± 0.04 | 6.71 ± 0.04 | 6.48 ± 0.12 | 0.00489              | 0.09896  | 0.12649 |
| TC0600003482.mm.1 | <a href="#">Amn1</a>      | antagonist of mitotic exit network 1                         | 5.09 ± 0.03        | 5.02 ± 0.05 | 4.93 ± 0.04 | 4.93 ± 0.05 | 0.0085               | 0.36463  | 0.41694 |
| TC0900001771.mm.1 | <a href="#">Amotl1</a>    | angiomin-like 1                                              | 8.36 ± 0.06        | 8.4 ± 0.01  | 8.54 ± 0.02 | 8.3 ± 0.05  | 0.44774              | 0.03479  | 0.00784 |
| TC1100002036.mm.1 | <a href="#">Anapc11</a>   | anaphase promoting complex subunit 11                        | 7.28 ± 0.02        | 7.34 ± 0.01 | 7.41 ± 0.02 | 7.33 ± 0.01 | 0.00058              | 0.99577  | 0.00017 |
| TC1400000578.mm.1 | <a href="#">Ang</a>       | angiogenin, ribonuclease, RNase A family, 5                  | 7.8 ± 0.08         | 7.52 ± 0.03 | 7.87 ± 0.05 | 7.42 ± 0.08 | 0.87193              | 0.00021  | 0.12464 |
| TC0800001797.mm.1 | <a href="#">Angpt2</a>    | angiopoietin 2                                               | 8.27 ± 0.08        | 8.62 ± 0.06 | 8.55 ± 0.05 | 8.38 ± 0.08 | 0.62402              | 0.16659  | 0.00194 |
| TC0200002270.mm.1 | <a href="#">Angpt4</a>    | angiopoietin 4                                               | 7.17 ± 0.05        | 7.22 ± 0.07 | 7.78 ± 0.16 | 7.05 ± 0.17 | 0.07504              | 0.01463  | 0.00525 |
| TC0400004023.mm.1 | <a href="#">Angptl7</a>   | angiopoietin-like 7                                          | 7.43 ± 0.18        | 6.97 ± 0.13 | 7.9 ± 0.28  | 6.62 ± 0.11 | 0.78089              | 0.00042  | 0.04904 |
| TC1000000906.mm.1 | <a href="#">Ankrd24</a>   | ankyrin repeat domain 24                                     | 6.39 ± 0.03        | 6.49 ± 0.02 | 6.41 ± 0.02 | 6.51 ± 0.06 | 0.44598              | 0.00857  | 0.80946 |
| TC0300000955.mm.1 | <a href="#">Ankrd35</a>   | ankyrin repeat domain 35                                     | 5.5 ± 0.04         | 5.57 ± 0.03 | 5.71 ± 0.05 | 5.55 ± 0.03 | 0.01273              | 0.41401  | 0.00596 |
| TC0800002153.mm.1 | <a href="#">Ankrd37</a>   | ankyrin repeat domain 37                                     | 4.38 ± 0.02        | 4.6 ± 0.05  | 4.43 ± 0.06 | 4.5 ± 0.03  | 0.67823              | 0.00299  | 0.08226 |
| TC0700004608.mm.1 | <a href="#">Ano1</a>      | anoctamin 1, calcium activated chloride channel              | 8.06 ± 0.11        | 8.48 ± 0.11 | 7.92 ± 0.05 | 8.21 ± 0.09 | 0.03715              | 0.00414  | 0.63101 |
| TC0500002805.mm.1 | <a href="#">Antxr2</a>    | anthrax toxin receptor 2                                     | 8.9 ± 0.03         | 8.63 ± 0.05 | 8.95 ± 0.03 | 8.58 ± 0.09 | 0.84769              | 7.6E-05  | 0.28898 |
| TC0900000918.mm.1 | <a href="#">Anxa2</a>     | annexin A2                                                   | 9.93 ± 0.09        | 9.76 ± 0.06 | 9.92 ± 0.05 | 9.7 ± 0.04  | 0.41358              | 0.00722  | 0.89206 |
| TC0100000428.mm.1 | <a href="#">Aox3</a>      | aldehyde oxidase 3                                           | 5.57 ± 0.12        | 4.97 ± 0.07 | 5.29 ± 0.02 | 5.2 ± 0.06  | 0.97913              | 0.0025   | 0.02154 |
| TC1100000058.mm.1 | <a href="#">Ap1b1</a>     | adaptor protein complex AP-1, beta 1 subunit                 | 8.2 ± 0.04         | 8.02 ± 0.04 | 8.06 ± 0.04 | 8.12 ± 0.02 | 0.60634              | 0.11445  | 0.00557 |
| TC0700002057.mm.1 | <a href="#">Ap2a2</a>     | adaptor-related protein complex 2, alpha 2 subunit           | 9.59 ± 0.09        | 9.19 ± 0.06 | 9.21 ± 0.05 | 9.31 ± 0.05 | 0.09879              | 0.05473  | 0.00426 |
| TC0200004842.mm.1 | <a href="#">Apmap</a>     | adipocyte plasma membrane associated protein                 | 8.97 ± 0.13        | 8.87 ± 0.15 | 8.53 ± 0.13 | 9.14 ± 0.07 | 0.2844               | 0.15311  | 0.00629 |
| TC0700002496.mm.1 | <a href="#">Apoc1</a>     | apolipoprotein C-I                                           | 8.83 ± 0.2         | 8.3 ± 0.26  | 7.97 ± 0.27 | 8.77 ± 0.15 | 0.28081              | 0.74991  | 0.00702 |
| TC1500000631.mm.1 | <a href="#">Apol7e</a>    | apolipoprotein L 7e                                          | 4.26 ± 0.07        | 4.6 ± 0.07  | 4.35 ± 0.04 | 4.19 ± 0.08 | 0.01897              | 0.36497  | 0.00661 |
| TC0700001431.mm.1 | <a href="#">Arap1</a>     | ArfGAP with RhoGAP domain, ankyrin repeat and PH domain      | 7.56 ± 0.05        | 7.64 ± 0.01 | 7.75 ± 0.03 | 7.67 ± 0.01 | 0.00691              | 0.77024  | 0.04628 |
| TC1200002083.mm.1 | <a href="#">Arel1</a>     | apoptosis resistant E3 ubiquitin protein ligase 1            | 8.41 ± 0.09        | 8.16 ± 0.05 | 8.1 ± 0.04  | 8.3 ± 0.03  | 0.22859              | 0.81233  | 0.00564 |
| TC1100001722.mm.1 | <a href="#">Arf2</a>      | ADP-ribosylation factor 2                                    | 7.76 ± 0.05        | 7.74 ± 0.04 | 7.79 ± 0.05 | 7.49 ± 0.05 | 0.08265              | 0.01454  | 0.00994 |
| TC0200002575.mm.1 | <a href="#">Arfgef2</a>   | ADP-ribosylation factor guanine nucleotide-exchange factor 2 | 8.61 ± 0.07        | 8.44 ± 0.06 | 8.38 ± 0.05 | 8.52 ± 0.03 | 0.08531              | 0.47328  | 0.00606 |
| TC0700003985.mm.1 | <a href="#">Arfip2</a>    | ADP-ribosylation factor interacting protein 2                | 6.85 ± 0.02        | 6.78 ± 0    | 6.75 ± 0.01 | 6.74 ± 0.01 | 0.00085              | 0.03951  | 0.05822 |
| TC0800002497.mm.1 | <a href="#">Arhgap10</a>  | Rho GTPase activating protein 10                             | 8.17 ± 0.06        | 8.18 ± 0.02 | 8.35 ± 0.05 | 7.93 ± 0.1  | 0.74086              | 0.01231  | 0.00445 |
| TC0900000621.mm.1 | <a href="#">Arhgap20</a>  | Rho GTPase activating protein 20                             | 6.86 ± 0.18        | 6.64 ± 0.08 | 7.98 ± 0.09 | 6.74 ± 0.16 | 0.00183              | 8.2E-05  | 0.00759 |
| TC1100001538.mm.1 | <a href="#">Arhgap23</a>  | Rho GTPase activating protein 23                             | 7.96 ± 0.03        | 7.99 ± 0.01 | 8.09 ± 0.03 | 7.95 ± 0.02 | 0.08459              | 0.0989   | 0.00656 |
| TC0500000997.mm.1 | <a href="#">Arhgap24</a>  | Rho GTPase activating protein 24                             | 7.23 ± 0.08        | 7.12 ± 0.03 | 7.24 ± 0.03 | 7.03 ± 0.03 | 0.32683              | 0.00682  | 0.45078 |
| TC0X00003430.mm.1 | <a href="#">Arhgap4</a>   | Rho GTPase activating protein 4                              | 5.79 ± 0.02        | 5.91 ± 0.01 | 5.85 ± 0.04 | 5.96 ± 0.05 | 0.16898              | 0.00655  | 0.96131 |
| TC0X00001700.mm.1 | <a href="#">Arhgap6</a>   | Rho GTPase activating protein 6                              | 6.28 ± 0.06        | 6.45 ± 0.05 | 6.61 ± 0.09 | 6.34 ± 0.05 | 0.12926              | 0.4597   | 0.0046  |
| TC0400003862.mm.1 | <a href="#">Arhgef10l</a> | Rho guanine nucleotide exchange factor (GEF) 10-like         | 8.06 ± 0.11        | 8.3 ± 0.05  | 8.31 ± 0.05 | 8.1 ± 0.04  | 0.59526              | 0.64809  | 0.00827 |



Supplemental Table I

| Probe Set ID      | Symbol                   | Annotations<br>Description                                     | Summary Statistics |              |             |              | 2 way ANOVA p-values |          |         |
|-------------------|--------------------------|----------------------------------------------------------------|--------------------|--------------|-------------|--------------|----------------------|----------|---------|
|                   |                          |                                                                | XY sh              | XY Or        | XX sh       | XX Or        | XY vs XX             | Sh vs Or | Intrxn  |
| TC080000096.mm.1  | <a href="#">Arhgef7</a>  | Rho guanine nucleotide exchange factor (GEF7)                  | 8.25 ± 0.01        | 8.21 ± 0.03  | 8.23 ± 0.04 | 7.98 ± 0.09  | 0.02528              | 0.00994  | 0.04264 |
| TC0900002382.mm.1 | <a href="#">Arid3b</a>   | AT rich interactive domain 3B (BRIGHT-like)                    | 5.4 ± 0.02         | 5.6 ± 0.03   | 5.54 ± 0.01 | 5.55 ± 0.02  | 0.10257              | 0.00063  | 0.00194 |
| TC1800000490.mm.1 | <a href="#">Arl14epl</a> | ADP-ribosylation factor-like 14 effector protein-like          | 5.04 ± 0.04        | 5.24 ± 0.04  | 5.09 ± 0.06 | 5.19 ± 0.06  | 0.94528              | 0.00953  | 0.26431 |
| TC0800001116.mm.1 | <a href="#">Arl2bp</a>   | ADP-ribosylation factor-like 2 binding protein                 | 8.59 ± 0.01        | 8.49 ± 0.04  | 8.65 ± 0.02 | 8.48 ± 0.07  | 0.61157              | 0.00587  | 0.36627 |
| TC0700001660.mm.1 | <a href="#">Arlnt1</a>   | aryl hydrocarbon receptor nuclear translocator-like            | 6.66 ± 0.22        | 6.33 ± 0.23  | 8.55 ± 0.1  | 6.37 ± 0.17  | 0.00052              | 1E-05    | 0.00072 |
| TC0500001763.mm.1 | <a href="#">Arpc1a</a>   | actin related protein 2/3 complex, subunit 1A                  | 8.43 ± 0.05        | 8.28 ± 0.04  | 8.26 ± 0.02 | 8.37 ± 0.02  | 0.3463               | 0.60595  | 0.00585 |
| TC0700001391.mm.1 | <a href="#">Arrb1</a>    | arrestin, beta 1                                               | 8.64 ± 0.04        | 8.58 ± 0.03  | 8.85 ± 0.06 | 8.5 ± 0.09   | 0.21595              | 0.00297  | 0.01452 |
| TC1800000619.mm.1 | <a href="#">Arsj</a>     | arylsulfatase i                                                | 5.63 ± 0.04        | 5.84 ± 0.04  | 5.97 ± 0.03 | 5.87 ± 0.05  | 0.00148              | 0.45602  | 0.00656 |
| TC0300001268.mm.1 | <a href="#">Arsj</a>     | arylsulfatase J                                                | 5.8 ± 0.11         | 5.62 ± 0.04  | 5.76 ± 0.07 | 5.29 ± 0.07  | 0.09339              | 0.00439  | 0.04672 |
| TC0500000871.mm.1 | <a href="#">Art3</a>     | ADP-ribosyltransferase 3                                       | 8.01 ± 0.07        | 7.77 ± 0.04  | 7.64 ± 0.07 | 7.84 ± 0.07  | 0.04847              | 0.96266  | 0.00614 |
| TC1200002263.mm.1 | <a href="#">Asb2</a>     | ankyrin repeat and SOCS box-containing 2                       | 7.85 ± 0.17        | 8.08 ± 0.06  | 8.15 ± 0.08 | 7.71 ± 0.05  | 0.86397              | 0.45537  | 0.0096  |
| TC0600000025.mm.1 | <a href="#">Asb4</a>     | ankyrin repeat and SOCS box-containing 4                       | 4.14 ± 0.02        | 4.13 ± 0.02  | 4.22 ± 0.01 | 4.06 ± 0.05  | 0.51714              | 0.02293  | 0.00885 |
| TC0800000588.mm.1 | <a href="#">Asb5</a>     | ankyrin repeat and SOCS box-containing 5                       | 4.72 ± 0.08        | 4.79 ± 0.06  | 5.21 ± 0.1  | 4.71 ± 0.05  | 0.02664              | 0.0151   | 0.00375 |
| TC0800000937.mm.1 | <a href="#">Asf1b</a>    | ASF1 anti-silencing function 1 homolog B (S. cerevisiae)       | 5.48 ± 0.06        | 5.67 ± 0.03  | 5.52 ± 0.03 | 5.74 ± 0.08  | 0.48234              | 0.00468  | 0.5393  |
| TC0600001839.mm.1 | <a href="#">Asns</a>     | asparagine synthetase                                          | 7.4 ± 0.2          | 7 ± 0.15     | 6.81 ± 0.16 | 7.43 ± 0.05  | 0.50254              | 0.59814  | 0.00454 |
| TC1300000566.mm.1 | <a href="#">Aspn</a>     | asporin                                                        | 9.53 ± 0.06        | 9.1 ± 0.06   | 9.87 ± 0.12 | 9.01 ± 0.13  | 0.18107              | 1.7E-05  | 0.0355  |
| TC0600000995.mm.1 | <a href="#">Asprv1</a>   | aspartic peptidase, retroviral-like 1                          | 4.25 ± 0.06        | 4.48 ± 0.08  | 4.29 ± 0.08 | 4.45 ± 0.08  | 0.65316              | 0.01     | 0.4378  |
| TC0400002822.mm.1 | <a href="#">Astin2</a>   | astrotactin 2                                                  | 6.9 ± 0.11         | 6.9 ± 0.03   | 6.44 ± 0.02 | 6.76 ± 0.09  | 0.00696              | 0.02985  | 0.16484 |
| TC0100003804.mm.1 | <a href="#">Atf3</a>     | activating transcription factor 3                              | 7.42 ± 0.1         | 7.97 ± 0.15  | 7.92 ± 0.11 | 7.53 ± 0.17  | 0.87407              | 0.81114  | 0.00699 |
| TC1700000643.mm.1 | <a href="#">Atf6b</a>    | activating transcription factor 6 beta                         | 7.73 ± 0.04        | 7.81 ± 0.02  | 7.89 ± 0.04 | 7.72 ± 0.02  | 0.29249              | 0.18911  | 0.00195 |
| TC0100000824.mm.1 | <a href="#">Atg16l1</a>  | autophagy related 16-like 1 (S. cerevisiae)                    | 6.66 ± 0.02        | 6.63 ± 0.01  | 6.55 ± 0.03 | 6.59 ± 0.02  | 0.00458              | 0.95207  | 0.10667 |
| TC1200002311.mm.1 | <a href="#">Atg2b</a>    | autophagy related 2B                                           | 7.33 ± 0.03        | 7.28 ± 0.01  | 7.19 ± 0.04 | 7.23 ± 0.03  | 0.00596              | 0.56866  | 0.12589 |
| TC0800000111.mm.1 | <a href="#">Atp11a</a>   | ATPase, class VI, type 11A                                     | 8.16 ± 0.06        | 7.89 ± 0.02  | 7.95 ± 0.04 | 7.72 ± 0.07  | 0.00837              | 0.00105  | 0.89987 |
| TC0100003566.mm.1 | <a href="#">Atp1a2</a>   | ATPase, Na+/K+ transporting, alpha 2 polypeptide               | 10.44 ± 0.13       | 10.39 ± 0.07 | 10.16 ± 0.1 | 10.71 ± 0.07 | 0.69923              | 0.08819  | 0.0038  |
| TC0100003422.mm.1 | <a href="#">Atp1b1</a>   | ATPase, Na+/K+ transporting, beta 1 polypeptide                | 9.42 ± 0.67        | 8.17 ± 0.28  | 7.16 ± 0.16 | 9.17 ± 0.27  | 0.27439              | 0.28785  | 0.00529 |
| TC1000001198.mm.1 | <a href="#">Atp2b1</a>   | ATPase, Ca++ transporting, plasma membrane 1                   | 8.79 ± 0.07        | 8.59 ± 0.06  | 8.49 ± 0.02 | 8.37 ± 0.12  | 0.00945              | 0.09801  | 0.87954 |
| TC0400003379.mm.1 | <a href="#">Atp6v0b</a>  | ATPase, H+ transporting, lysosomal V0 subunit B                | 7.82 ± 0.08        | 7.62 ± 0.03  | 7.58 ± 0.05 | 7.74 ± 0.03  | 0.41028              | 0.82618  | 0.00822 |
| TC0200001998.mm.1 | <a href="#">Atrn</a>     | attractin                                                      | 7.97 ± 0.03        | 7.9 ± 0.03   | 7.79 ± 0.02 | 7.83 ± 0.03  | 0.0007               | 0.52255  | 0.06483 |
| TC0500003329.mm.1 | <a href="#">Auts2</a>    | autism susceptibility candidate 2                              | 6.65 ± 0.08        | 6.79 ± 0.02  | 6.91 ± 0.08 | 6.64 ± 0.03  | 0.36466              | 0.3588   | 0.00656 |
| TC1000001506.mm.1 | <a href="#">Avpr1a</a>   | arginine vasopressin receptor 1A                               | 8.16 ± 0.12        | 7.09 ± 0.08  | 8.36 ± 0.04 | 6.83 ± 0.14  | 0.93719              | 2E-08    | 0.03206 |
| TC1500001412.mm.1 | <a href="#">Azin1</a>    | antizyme inhibitor 1                                           | 8.67 ± 0.07        | 8.59 ± 0.1   | 8.39 ± 0.03 | 8.2 ± 0.07   | 0.0009               | 0.14863  | 0.32388 |
| TC1600000560.mm.1 | <a href="#">B4galt4</a>  | UDP-Gal:betaGlcNAc beta 1,4-galactosyltransferase, polypeptide | 6.88 ± 0.02        | 6.89 ± 0.04  | 6.85 ± 0    | 6.73 ± 0.04  | 0.00681              | 0.07826  | 0.03609 |

Supplemental Table I

| Probe Set ID      | Symbol                    | Annotations<br>Description                                  | Summary Statistics |              |              |              | 2 way ANOVA p-values |          |         |
|-------------------|---------------------------|-------------------------------------------------------------|--------------------|--------------|--------------|--------------|----------------------|----------|---------|
|                   |                           |                                                             | XY sh              | XY Or        | XX sh        | XX Or        | XY vs XX             | Sh vs Or | Intrxn  |
| TC0200005186.mm.1 | <a href="#">B4galt5</a>   | UDP-Gal:betaGlcNAc beta 1,4-galactosyltransferase, polypep  | 7.59 ± 0.05        | 7.56 ± 0.04  | 7.42 ± 0.04  | 7.43 ± 0.03  | 0.00734              | 0.92973  | 0.78814 |
| TC0800000786.mm.1 | <a href="#">Babam1</a>    | BRISC and BRCA1 A complex member 1                          | 9.06 ± 0.05        | 9.08 ± 0.04  | 9.23 ± 0.03  | 9.26 ± 0.03  | 0.00335              | 0.85616  | 0.54758 |
| TC0400000254.mm.1 | <a href="#">Bach2</a>     | BTB and CNC homology 2                                      | 5.84 ± 0.02        | 5.98 ± 0.01  | 5.9 ± 0      | 5.98 ± 0.05  | 0.31005              | 0.00141  | 0.22373 |
| TC0700001886.mm.1 | <a href="#">Bag3</a>      | BCL2-associated athanogene 3                                | 8.73 ± 0.05        | 8.77 ± 0.1   | 8.46 ± 0.08  | 8.5 ± 0.07   | 0.00374              | 0.4675   | 0.85558 |
| TC0800001919.mm.1 | <a href="#">Bag4</a>      | BCL2-associated athanogene 4                                | 7.17 ± 0.08        | 6.88 ± 0.08  | 6.94 ± 0.08  | 7.06 ± 0.01  | 0.57524              | 0.17926  | 0.00941 |
| TC1700000670.mm.1 | <a href="#">Bag6</a>      | BCL2-associated athanogene 6                                | 7.96 ± 0.02        | 8.01 ± 0.02  | 8.06 ± 0.01  | 8.07 ± 0.02  | 0.0033               | 0.17861  | 0.49154 |
| TC1800000008.mm.1 | <a href="#">Bambi</a>     | BMP and activin membrane-bound inhibitor                    | 6.56 ± 0.05        | 6.96 ± 0.11  | 6.77 ± 0.04  | 6.74 ± 0.1   | 0.84241              | 0.02159  | 0.00978 |
| TC0800001477.mm.1 | <a href="#">Banp</a>      | BTG3 associated nuclear protein                             | 7.11 ± 0.06        | 7.3 ± 0.06   | 7.05 ± 0.03  | 7.19 ± 0.03  | 0.16068              | 0.00758  | 0.61992 |
| TC0500001578.mm.1 | <a href="#">Baz1b</a>     | bromodomain adjacent to zinc finger domain, 1B              | 8.46 ± 0.03        | 8.52 ± 0.03  | 8.38 ± 0.02  | 8.38 ± 0.05  | 0.00853              | 0.36053  | 0.38536 |
| TC1100000251.mm.1 | <a href="#">Bcl11a</a>    | B cell CLL/lymphoma 11A (zinc finger protein)               | 4.39 ± 0.05        | 4.61 ± 0.03  | 4.55 ± 0.05  | 4.71 ± 0.08  | 0.06977              | 0.00836  | 0.88705 |
| TC1200002339.mm.1 | <a href="#">Bcl11b</a>    | B cell leukemia/lymphoma 11B                                | 5.16 ± 0.08        | 5.7 ± 0.15   | 5.27 ± 0.05  | 5.6 ± 0.15   | 0.95866              | 0.00206  | 0.41861 |
| TC0500001413.mm.1 | <a href="#">Bcl7a</a>     | B cell CLL/lymphoma 7A                                      | 6.79 ± 0.02        | 6.88 ± 0.02  | 6.84 ± 0.02  | 6.87 ± 0.01  | 0.16847              | 0.0052   | 0.11325 |
| TC1000000708.mm.1 | <a href="#">Bcr</a>       | breakpoint cluster region                                   | 8.29 ± 0.03        | 8.26 ± 0.02  | 8.42 ± 0.05  | 8.21 ± 0.04  | 0.28109              | 0.00717  | 0.02934 |
| TC0300001365.mm.1 | <a href="#">Bdh2</a>      | 3-hydroxybutyrate dehydrogenase, type 2                     | 6.33 ± 0.03        | 6.28 ± 0.06  | 6.5 ± 0.02   | 6.36 ± 0.01  | 0.00287              | 0.04377  | 0.12627 |
| TC0200000033.mm.1 | <a href="#">Bend7</a>     | BEN domain containing 7                                     | 6.08 ± 0.03        | 6.06 ± 0.02  | 5.88 ± 0.03  | 6.11 ± 0.03  | 0.01379              | 0.00287  | 0.00053 |
| TC1600000162.mm.1 | <a href="#">Bfar</a>      | bifunctional apoptosis regulator                            | 7.25 ± 0.03        | 7.23 ± 0.02  | 7.06 ± 0.05  | 7.22 ± 0.02  | 0.00489              | 0.10746  | 0.0095  |
| TC0900002971.mm.1 | <a href="#">Bfsp2</a>     | beaded filament structural protein 2, phakinin              | 5.12 ± 0.01        | 5.28 ± 0.02  | 5.21 ± 0.04  | 5.37 ± 0.1   | 0.09864              | 0.00763  | 0.97543 |
| TC0600001203.mm.1 | <a href="#">Bhlhe40</a>   | basic helix-loop-helix family, member e40                   | 8.16 ± 0.08        | 8.09 ± 0.05  | 7.5 ± 0.1    | 8.27 ± 0.09  | 0.00658              | 0.00161  | 0.00011 |
| TC0600003428.mm.1 | <a href="#">Bhlhe41</a>   | basic helix-loop-helix family, member e41                   | 7.5 ± 0.08         | 7.75 ± 0.11  | 6.52 ± 0.07  | 7.68 ± 0.15  | 0.00052              | 1.1E-05  | 0.00163 |
| TC0900001722.mm.1 | <a href="#">Birc3</a>     | baculoviral IAP repeat-containing 3                         | 7.18 ± 0.04        | 7.12 ± 0.05  | 7.29 ± 0.04  | 6.97 ± 0.1   | 0.74608              | 0.00771  | 0.0401  |
| TC1400002219.mm.1 | <a href="#">Blk</a>       | B lymphoid kinase                                           | 5.23 ± 0.03        | 5.52 ± 0.06  | 5.41 ± 0.06  | 5.65 ± 0.09  | 0.03093              | 0.00102  | 0.79379 |
| TC1400002343.mm.1 | <a href="#">Bmp1</a>      | bone morphogenetic protein 1                                | 8.68 ± 0.08        | 8.55 ± 0.04  | 8.64 ± 0.07  | 8.27 ± 0.05  | 0.04797              | 0.00409  | 0.04906 |
| TC0900000226.mm.1 | <a href="#">Bmper</a>     | BMP-binding endothelial regulator                           | 6.74 ± 0.02        | 6.34 ± 0.03  | 6.64 ± 0.03  | 6.28 ± 0.04  | 0.01186              | 1.1E-08  | 0.37605 |
| TC0700004474.mm.1 | <a href="#">Bnip3</a>     | BCL2/adenovirus E1B interacting protein 3                   | 8.87 ± 0.09        | 8.68 ± 0.11  | 8.12 ± 0.11  | 8.83 ± 0.06  | 0.00744              | 0.02361  | 0.0004  |
| TC1600001643.mm.1 | <a href="#">Boc</a>       | biregional cell adhesion molecule-related/down-regulated by | 8.73 ± 0.09        | 8.67 ± 0.06  | 9.18 ± 0.1   | 8.6 ± 0.14   | 0.08186              | 0.00868  | 0.02289 |
| TC1100003434.mm.1 | <a href="#">Brip1</a>     | BRCA1 interacting protein C-terminal helicase 1             | 4.7 ± 0.05         | 4.78 ± 0.04  | 4.79 ± 0.04  | 4.6 ± 0.05   | 0.60903              | 0.47662  | 0.00778 |
| TC1000000812.mm.1 | <a href="#">Bsg</a>       | basigin                                                     | 11.22 ± 0.03       | 11.13 ± 0.03 | 11.14 ± 0.01 | 11.25 ± 0.04 | 0.9002               | 0.93358  | 0.00199 |
| TC1900000523.mm.1 | <a href="#">Btaf1</a>     | BTA1 RNA polymerase II, B-TFIID transcription factor-asso   | 7.81 ± 0.08        | 7.8 ± 0.08   | 7.6 ± 0.05   | 7.46 ± 0.1   | 0.00307              | 0.28994  | 0.5361  |
| TC1000002508.mm.1 | <a href="#">Btbd2</a>     | BTB (POZ) domain containing 2                               | 7.82 ± 0.03        | 7.81 ± 0.02  | 7.88 ± 0.01  | 7.9 ± 0.01   | 0.0048               | 0.81197  | 0.54103 |
| TC0100003102.mm.1 | <a href="#">Btg2</a>      | B cell translocation gene 2, anti-proliferative             | 8.56 ± 0.09        | 8.94 ± 0.13  | 8.86 ± 0.05  | 8.57 ± 0.11  | 0.61148              | 0.79894  | 0.00741 |
| TC1100002654.mm.1 | <a href="#">Btnl9</a>     | butyrophilin-like 9                                         | 6.96 ± 0.12        | 6.94 ± 0.16  | 6.71 ± 0.14  | 7.36 ± 0.01  | 0.82069              | 0.04935  | 0.00767 |
| TC0X00003426.mm.1 | <a href="#">C1qalt1c1</a> | C1GALT1-specific chaperone 1                                | 7.25 ± 0.06        | 7.35 ± 0.04  | 7.21 ± 0.05  | 6.93 ± 0.09  | 0.00608              | 0.28714  | 0.00407 |

Supplemental Table I

| Probe Set ID      | Symbol                   | Annotations<br>Description                                   | Summary Statistics |              |              |              | 2 way ANOVA p-values |          |         |
|-------------------|--------------------------|--------------------------------------------------------------|--------------------|--------------|--------------|--------------|----------------------|----------|---------|
|                   |                          |                                                              | XY sh              | XY Or        | XX sh        | XX Or        | XY vs XX             | Sh vs Or | Intrxn  |
| TC0400003794.mm.1 | <a href="#">C1qa</a>     | complement component 1, q subcomponent, alpha polypeptide    | 8.18 ± 0.06        | 7.92 ± 0.08  | 8 ± 0.02     | 7.77 ± 0.06  | 0.01921              | 0.00147  | 0.93607 |
| TC0400003792.mm.1 | <a href="#">C1qb</a>     | complement component 1, q subcomponent, beta polypeptide     | 8.91 ± 0.08        | 8.43 ± 0.16  | 8.61 ± 0.09  | 8.16 ± 0.09  | 0.03903              | 0.00161  | 0.79765 |
| TC0400003793.mm.1 | <a href="#">C1qc</a>     | complement component 1, q subcomponent, C chain              | 7.89 ± 0.05        | 7.62 ± 0.08  | 7.8 ± 0.06   | 7.5 ± 0.05   | 0.19364              | 0.00066  | 0.51703 |
| TC1100000427.mm.1 | <a href="#">C1qtnf2</a>  | C1q and tumor necrosis factor related protein 2              | 7.62 ± 0.09        | 7.91 ± 0.05  | 8.04 ± 0.08  | 7.78 ± 0.05  | 0.05684              | 0.70844  | 0.00211 |
| TC0900002156.mm.1 | <a href="#">C2cd2l</a>   | C2 calcium-dependent domain containing 2-like                | 7.3 ± 0.05         | 7.21 ± 0.03  | 7.05 ± 0.03  | 7.2 ± 0.02   | 0.00778              | 0.2494   | 0.00984 |
| TC0600003387.mm.1 | <a href="#">C2cd5</a>    | C2 calcium-dependent domain containing 5                     | 6.98 ± 0.03        | 6.88 ± 0.03  | 6.96 ± 0.02  | 6.84 ± 0.05  | 0.49846              | 0.00655  | 0.65532 |
| TC1700002352.mm.1 | <a href="#">C3</a>       | complement component 3                                       | 11.79 ± 0.03       | 11.31 ± 0.11 | 11.5 ± 0.02  | 11.45 ± 0.07 | 0.36841              | 0.00196  | 0.0073  |
| TC0600003079.mm.1 | <a href="#">C3ar1</a>    | complement component 3a receptor 1                           | 6.69 ± 0.13        | 6.29 ± 0.11  | 6.46 ± 0.1   | 6.1 ± 0.07   | 0.13909              | 0.0078   | 0.91552 |
| TC1700002815.mm.1 | <a href="#">C4a</a>      | complement component 4A (Rodgers blood group)                | 7.91 ± 0.07        | 7.25 ± 0.07  | 7.67 ± 0.08  | 7.4 ± 0.03   | 0.62866              | 2.1E-05  | 0.02337 |
| TC1700002814.mm.1 | <a href="#">C4b</a>      | complement component 4B (Chido blood group)                  | 9.17 ± 0.08        | 8.24 ± 0.1   | 8.82 ± 0.12  | 8.42 ± 0.03  | 0.44218              | 5.2E-06  | 0.01499 |
| TC0700002422.mm.1 | <a href="#">C5ar1</a>    | complement component 5a receptor 1                           | 6.2 ± 0.07         | 5.83 ± 0.09  | 6.05 ± 0.07  | 5.89 ± 0.05  | 0.86453              | 0.005    | 0.28928 |
| TC1500001151.mm.1 | <a href="#">C7</a>       | complement component 7                                       | 12.42 ± 0.08       | 11 ± 0.03    | 12.43 ± 0.05 | 10.97 ± 0.24 | 0.88384              | 5E-08    | 0.70161 |
| TC0400001020.mm.1 | <a href="#">Cachd1</a>   | cache domain containing 1                                    | 7.54 ± 0.06        | 7.28 ± 0.03  | 7.31 ± 0.02  | 7.21 ± 0.06  | 0.01879              | 0.0075   | 0.24341 |
| TC1100003562.mm.1 | <a href="#">Cacna1g</a>  | calcium channel, voltage-dependent, T type, alpha 1G subunit | 6.57 ± 0.04        | 6.63 ± 0.04  | 6.77 ± 0.05  | 6.55 ± 0.02  | 0.10667              | 0.08788  | 0.00301 |
| TC1500000699.mm.1 | <a href="#">Cacna1i</a>  | calcium channel, voltage-dependent, alpha 1i subunit         | 5.8 ± 0.02         | 6 ± 0.04     | 5.9 ± 0.05   | 6.07 ± 0.08  | 0.14029              | 0.00399  | 0.84119 |
| TC0700000007.mm.1 | <a href="#">Cacng7</a>   | calcium channel, voltage-dependent, gamma subunit 7          | 8.45 ± 0.06        | 8.48 ± 0.04  | 8.72 ± 0.08  | 8.41 ± 0.04  | 0.046                | 0.09297  | 0.00568 |
| TC1500002301.mm.1 | <a href="#">Calcoco1</a> | calcium binding and coiled coil domain 1                     | 8.53 ± 0.04        | 8.71 ± 0.03  | 8.68 ± 0.04  | 8.58 ± 0.02  | 0.76765              | 0.36078  | 0.00306 |
| TC1300000013.mm.1 | <a href="#">Calm4</a>    | calmodulin 4                                                 | 4.98 ± 0.05        | 5.3 ± 0.05   | 5.13 ± 0.01  | 5.09 ± 0.04  | 0.46629              | 0.00585  | 0.00153 |
| TC0900000794.mm.1 | <a href="#">Calm14</a>   | calmodulin-like 4                                            | 5.75 ± 0.03        | 5.68 ± 0.07  | 5.93 ± 0.03  | 5.65 ± 0.06  | 0.17728              | 0.00248  | 0.06691 |
| TC0800002593.mm.1 | <a href="#">Calr</a>     | calreticulin                                                 | 10.76 ± 0.07       | 10.57 ± 0.02 | 10.67 ± 0.05 | 10.37 ± 0.05 | 0.03094              | 0.00081  | 0.1559  |
| TC0200002876.mm.1 | <a href="#">Camk1d</a>   | calcium/calmodulin-dependent protein kinase ID               | 6.29 ± 0.02        | 6.3 ± 0.01   | 6.33 ± 0.02  | 6.21 ± 0.02  | 0.11477              | 0.00695  | 0.00222 |
| TC0400001728.mm.1 | <a href="#">Camk2n1</a>  | calcium/calmodulin-dependent protein kinase II inhibitor 1   | 8.09 ± 0.08        | 8.33 ± 0.05  | 8.54 ± 0.06  | 8.26 ± 0.05  | 0.00723              | 0.93773  | 0.0008  |
| TC0600001286.mm.1 | <a href="#">Cand2</a>    | cullin-associated and neddylation-dissociated 2 (putative)   | 6.28 ± 0.04        | 6.42 ± 0.02  | 6.53 ± 0.04  | 6.42 ± 0.01  | 0.00213              | 0.61673  | 0.00182 |
| TC1100002670.mm.1 | <a href="#">Canx</a>     | calnexin                                                     | 10.91 ± 0.05       | 10.72 ± 0.04 | 10.74 ± 0.02 | 10.62 ± 0.05 | 0.01924              | 0.0088   | 0.67005 |
| TC1700002154.mm.1 | <a href="#">Capn11</a>   | calpain 11                                                   | 4.08 ± 0.03        | 4.25 ± 0.05  | 4.13 ± 0.01  | 4.23 ± 0.05  | 0.55836              | 0.00323  | 0.28161 |
| TC0X00003114.mm.1 | <a href="#">Capn6</a>    | calpain 6                                                    | 5.49 ± 0.04        | 5.51 ± 0.06  | 5.83 ± 0.07  | 5.42 ± 0.08  | 0.03961              | 0.00944  | 0.00282 |
| TC0700000860.mm.1 | <a href="#">Car11</a>    | carbonic anhydrase 11                                        | 7.18 ± 0.03        | 7.26 ± 0.05  | 7.14 ± 0.03  | 7.28 ± 0.04  | 0.90925              | 0.00587  | 0.7457  |
| TC0300000095.mm.1 | <a href="#">Car3</a>     | carbonic anhydrase 3                                         | 12.71 ± 0.07       | 12.26 ± 0.1  | 12.17 ± 0.1  | 12.36 ± 0.12 | 0.03885              | 0.18705  | 0.00548 |
| TC1100001285.mm.1 | <a href="#">Car4</a>     | carbonic anhydrase 4                                         | 6.92 ± 0.07        | 6.77 ± 0.11  | 6.56 ± 0.11  | 6.98 ± 0.06  | 0.32913              | 0.18312  | 0.00482 |
| TC0800003060.mm.1 | <a href="#">Car5a</a>    | carbonic anhydrase 5a, mitochondrial                         | 5.62 ± 0.03        | 5.78 ± 0.04  | 5.65 ± 0.03  | 5.74 ± 0.06  | 0.86742              | 0.00777  | 0.35322 |
| TC0X00003327.mm.1 | <a href="#">Car5b</a>    | carbonic anhydrase 5b, mitochondrial                         | 8.92 ± 0.17        | 8.2 ± 0.16   | 8.23 ± 0.15  | 8.42 ± 0.09  | 0.1049               | 0.07866  | 0.00713 |
| TC0500003518.mm.1 | <a href="#">Card11</a>   | caspase recruitment domain family, member 11                 | 5.59 ± 0.05        | 5.88 ± 0.02  | 5.67 ± 0.07  | 5.85 ± 0.06  | 0.77127              | 0.00088  | 0.34578 |

Supplemental Table I

| Probe Set ID      | Symbol                  | Annotations<br>Description                      | Summary Statistics |              |              |              | 2 way ANOVA p-values |          |         |
|-------------------|-------------------------|-------------------------------------------------|--------------------|--------------|--------------|--------------|----------------------|----------|---------|
|                   |                         |                                                 | XY sh              | XY Or        | XX sh        | XX Or        | XY vs XX             | Sh vs Or | Intrxn  |
| TC0700004589.mm.1 | <a href="#">Cars</a>    | cysteinyl-tRNA synthetase                       | 6.91 ± 0.04        | 6.8 ± 0.03   | 6.72 ± 0.02  | 6.73 ± 0     | 0.0026               | 0.3018   | 0.16235 |
| TC0900000032.mm.1 | <a href="#">Casp4</a>   | caspase 4, apoptosis-related cysteine peptidase | 6.45 ± 0.1         | 6.13 ± 0.07  | 5.81 ± 0.07  | 5.51 ± 0.15  | 6.2E-05              | 0.01726  | 0.8269  |
| TC0200004227.mm.1 | <a href="#">Cat</a>     | catalase                                        | 11.67 ± 0.1        | 11.47 ± 0.1  | 11.34 ± 0.12 | 11.85 ± 0.03 | 0.86446              | 0.27167  | 0.00126 |
| TC1500001890.mm.1 | <a href="#">Cbx7</a>    | chromobox 7                                     | 7.23 ± 0.04        | 7.45 ± 0.03  | 7.51 ± 0.04  | 7.48 ± 0.03  | 0.0007               | 0.01574  | 0.00234 |
| TC0400001152.mm.1 | <a href="#">Cc2d1b</a>  | coiled-coil and C2 domain containing 1B         | 6.81 ± 0.01        | 6.84 ± 0.01  | 6.87 ± 0.02  | 6.84 ± 0     | 0.00428              | 0.90719  | 0.0022  |
| TC1800001296.mm.1 | <a href="#">Ccdc112</a> | coiled-coil domain containing 112               | 6.08 ± 0.05        | 5.98 ± 0.09  | 6.66 ± 0.11  | 5.91 ± 0.13  | 0.01269              | 0.00131  | 0.00312 |
| TC1700001791.mm.1 | <a href="#">Ccdc167</a> | coiled-coil domain containing 167               | 6.69 ± 0.07        | 6.8 ± 0.04   | 7.06 ± 0.07  | 6.76 ± 0.09  | 0.02466              | 0.25335  | 0.00803 |
| TC0500003112.mm.1 | <a href="#">Ccdc60</a>  | coiled-coil domain containing 60                | 6.03 ± 0.05        | 6.16 ± 0.03  | 6.32 ± 0.08  | 6.08 ± 0.04  | 0.04074              | 0.37799  | 0.00222 |
| TC0700002462.mm.1 | <a href="#">Ccdc61</a>  | coiled-coil domain containing 61                | 6.6 ± 0.02         | 6.77 ± 0.02  | 6.71 ± 0.02  | 6.79 ± 0.06  | 0.08153              | 0.00378  | 0.22948 |
| TC1600000667.mm.1 | <a href="#">Ccdc80</a>  | coiled-coil domain containing 80                | 9.86 ± 0.08        | 9.54 ± 0.04  | 9.66 ± 0.03  | 9.19 ± 0.08  | 0.00281              | 0.00012  | 0.16798 |
| TC1100002406.mm.1 | <a href="#">Ccdc85a</a> | coiled-coil domain containing 85A               | 5.73 ± 0.02        | 5.81 ± 0.05  | 5.7 ± 0.02   | 5.84 ± 0.04  | 0.97549              | 0.00769  | 0.28722 |
| TC1900000965.mm.1 | <a href="#">Ccdc85b</a> | coiled-coil domain containing 85B               | 7.75 ± 0.03        | 7.89 ± 0.02  | 7.72 ± 0.03  | 7.82 ± 0.02  | 0.25026              | 0.00049  | 0.24502 |
| TC1200002237.mm.1 | <a href="#">Ccdc88c</a> | coiled-coil domain containing 88C               | 6.84 ± 0.04        | 7.03 ± 0.03  | 6.87 ± 0.04  | 6.94 ± 0.02  | 0.35144              | 0.00267  | 0.13436 |
| TC4_JH584293_rand | <a href="#">Ccl27a</a>  | chemokine (C-C motif) ligand 27A                | 7.94 ± 0.03        | 8.06 ± 0.04  | 8.09 ± 0.01  | 8.12 ± 0.03  | 0.00763              | 0.03796  | 0.21202 |
| TC1100003399.mm.1 | <a href="#">Ccl6</a>    | chemokine (C-C motif) ligand 6                  | 8.18 ± 0.12        | 7.43 ± 0.13  | 7.44 ± 0.08  | 7 ± 0.11     | 0.00052              | 0.0004   | 0.39803 |
| TC1100001223.mm.1 | <a href="#">Ccl8</a>    | chemokine (C-C motif) ligand 8                  | 6.66 ± 0.22        | 5.63 ± 0.21  | 6.17 ± 0.08  | 5.28 ± 0.08  | 0.04739              | 0.00013  | 0.86269 |
| TC1100003397.mm.1 | <a href="#">Ccl9</a>    | chemokine (C-C motif) ligand 9                  | 8.57 ± 0.18        | 7.72 ± 0.15  | 7.72 ± 0.11  | 7.06 ± 0.08  | 0.0005               | 0.0005   | 0.93167 |
| TC0300001992.mm.1 | <a href="#">Ccna1</a>   | cyclin A1                                       | 4.62 ± 0.03        | 4.72 ± 0.03  | 4.63 ± 0.05  | 4.78 ± 0.06  | 0.38379              | 0.00817  | 0.58124 |
| TC0400000085.mm.1 | <a href="#">Ccne2</a>   | cyclin E2                                       | 4.38 ± 0.05        | 4.41 ± 0.05  | 4.22 ± 0.05  | 4.28 ± 0.01  | 0.00943              | 0.25885  | 0.81547 |
| TC0500002770.mm.1 | <a href="#">Ccni</a>    | cyclin I                                        | 10.1 ± 0.05        | 10.18 ± 0.02 | 10.34 ± 0.02 | 10.19 ± 0.04 | 0.00452              | 0.39932  | 0.00779 |
| TC0400002092.mm.1 | <a href="#">Ccnl2</a>   | cyclin L2                                       | 7.39 ± 0.06        | 7.39 ± 0.04  | 7.2 ± 0.03   | 7.27 ± 0.02  | 0.00492              | 0.54302  | 0.36452 |
| TC1100003796.mm.1 | <a href="#">Ccr10</a>   | chemokine (C-C motif) receptor 10               | 4.8 ± 0.05         | 5.11 ± 0.12  | 4.91 ± 0.08  | 5.17 ± 0.1   | 0.34225              | 0.00459  | 0.75238 |
| TC0900001675.mm.1 | <a href="#">Ccr5</a>    | chemokine (C-C motif) receptor 5                | 4.83 ± 0.05        | 4.56 ± 0.08  | 4.73 ± 0.05  | 4.54 ± 0.05  | 0.26112              | 0.00122  | 0.37964 |
| TC1700000084.mm.1 | <a href="#">Ccr6</a>    | chemokine (C-C motif) receptor 6                | 4.27 ± 0.04        | 4.41 ± 0.01  | 4.37 ± 0.06  | 4.48 ± 0.04  | 0.04268              | 0.00885  | 0.61256 |
| TC1100003696.mm.1 | <a href="#">Ccr7</a>    | chemokine (C-C motif) receptor 7                | 6.61 ± 0.05        | 6.96 ± 0.11  | 6.72 ± 0.12  | 6.99 ± 0.03  | 0.47305              | 0.00306  | 0.71445 |
| TC0900001670.mm.1 | <a href="#">Ccr9</a>    | chemokine (C-C motif) receptor 9                | 3.82 ± 0.02        | 4.19 ± 0.1   | 3.92 ± 0.05  | 4.18 ± 0.07  | 0.50173              | 0.00022  | 0.42637 |
| TC0900003125.mm.1 | <a href="#">Ccr12</a>   | chemokine (C-C motif) receptor-like 2           | 5.9 ± 0.08         | 6.02 ± 0.07  | 6.25 ± 0.1   | 5.84 ± 0.03  | 0.29139              | 0.08799  | 0.00488 |
| TC1000002920.mm.1 | <a href="#">Cct2</a>    | chaperonin containing Tcp1, subunit 2 (beta)    | 9.92 ± 0.04        | 9.86 ± 0.04  | 9.73 ± 0.02  | 9.72 ± 0.04  | 0.00174              | 0.48011  | 0.72043 |
| TC0300000721.mm.1 | <a href="#">Cct3</a>    | chaperonin containing Tcp1, subunit 3 (gamma)   | 9.06 ± 0.05        | 8.93 ± 0.09  | 8.76 ± 0.03  | 8.75 ± 0.06  | 0.00163              | 0.23672  | 0.30302 |
| TC0600001418.mm.1 | <a href="#">Cd163</a>   | CD163 antigen                                   | 8.77 ± 0.16        | 7.98 ± 0.09  | 8.08 ± 0.08  | 7.75 ± 0.06  | 0.00581              | 0.0012   | 0.18616 |
| TC0300002277.mm.1 | <a href="#">Cd1d1</a>   | CD1d1 antigen                                   | 7.71 ± 0.19        | 7.49 ± 0.17  | 7.14 ± 0.16  | 7.88 ± 0.04  | 0.32058              | 0.27069  | 0.00406 |
| TC0300000689.mm.1 | <a href="#">Cd1d2</a>   | CD1d2 antigen                                   | 7.46 ± 0.19        | 7.26 ± 0.17  | 6.89 ± 0.21  | 7.69 ± 0.03  | 0.40138              | 0.22594  | 0.00495 |

Supplemental Table I

| Probe Set ID      | Symbol                   | Annotations<br>Description                     | Summary Statistics |             |              |             | 2 way ANOVA p-values |          |         |
|-------------------|--------------------------|------------------------------------------------|--------------------|-------------|--------------|-------------|----------------------|----------|---------|
|                   |                          |                                                | XY sh              | XY Or       | XX sh        | XX Or       | XY vs XX             | Sh vs Or | Intrxn  |
| TC0800001624.mm.1 | <a href="#">Cd209b</a>   | CD209b antigen                                 | 6.25 ± 0.08        | 5.68 ± 0.03 | 6.21 ± 0.11  | 6.12 ± 0.08 | 0.0177               | 0.00189  | 0.01468 |
| TC0800001623.mm.1 | <a href="#">Cd209d</a>   | CD209d antigen                                 | 5.82 ± 0.07        | 5.22 ± 0.1  | 5.76 ± 0.15  | 5.53 ± 0.05 | 0.22711              | 0.00091  | 0.0788  |
| TC0800001627.mm.1 | <a href="#">Cd209f</a>   | CD209f antigen                                 | 8.24 ± 0.06        | 7.92 ± 0.09 | 8.47 ± 0.07  | 8.06 ± 0.1  | 0.03975              | 0.00055  | 0.65051 |
| TC0800000027.mm.1 | <a href="#">Cd209g</a>   | CD209g antigen                                 | 8.44 ± 0.07        | 8.01 ± 0.09 | 8.65 ± 0.08  | 8.24 ± 0.12 | 0.03502              | 0.00047  | 0.87499 |
| TC0100001527.mm.1 | <a href="#">Cd247</a>    | CD247 antigen                                  | 5.24 ± 0.03        | 5.45 ± 0.03 | 5.3 ± 0.03   | 5.45 ± 0.06 | 0.61293              | 0.00087  | 0.60875 |
| TC1900000055.mm.1 | <a href="#">Cd248</a>    | CD248 antigen, endosialin                      | 9.33 ± 0.1         | 9.13 ± 0.04 | 9.61 ± 0.11  | 9.07 ± 0.06 | 0.27353              | 0.00068  | 0.07373 |
| TC0600003140.mm.1 | <a href="#">Cd27</a>     | CD27 antigen                                   | 5.57 ± 0.06        | 6.18 ± 0.14 | 5.56 ± 0.1   | 6.12 ± 0.19 | 0.66443              | 0.00072  | 0.9704  |
| TC0900002396.mm.1 | <a href="#">Cd276</a>    | CD276 antigen                                  | 7.59 ± 0.07        | 7.76 ± 0.05 | 7.72 ± 0.03  | 7.58 ± 0.02 | 0.78779              | 0.69579  | 0.00742 |
| TC0100000476.mm.1 | <a href="#">Cd28</a>     | CD28 antigen                                   | 4.61 ± 0.03        | 4.83 ± 0.08 | 4.6 ± 0.05   | 4.79 ± 0.08 | 0.62745              | 0.00731  | 0.93106 |
| TC1100004053.mm.1 | <a href="#">Cd300ld</a>  | CD300 molecule-like family member d            | 7.34 ± 0.09        | 6.93 ± 0.06 | 7.21 ± 0.09  | 6.81 ± 0.12 | 0.30796              | 0.00122  | 0.88155 |
| TC1100001677.mm.1 | <a href="#">Cd300lg</a>  | CD300 antigen like family member G             | 7.84 ± 0.14        | 7.66 ± 0.12 | 7.39 ± 0.14  | 8.06 ± 0.04 | 0.60021              | 0.11851  | 0.00198 |
| TC1100004058.mm.1 | <a href="#">Cd300lh</a>  | CD300 antigen like family member H             | 7.88 ± 0.08        | 7.56 ± 0.1  | 7.83 ± 0.04  | 7.67 ± 0.04 | 0.55551              | 0.00736  | 0.35346 |
| TC0700002950.mm.1 | <a href="#">Cd33</a>     | CD33 antigen                                   | 6.99 ± 0.04        | 6.9 ± 0.05  | 7.11 ± 0.04  | 6.9 ± 0.05  | 0.19787              | 0.00353  | 0.19787 |
| TC0100001882.mm.1 | <a href="#">Cd34</a>     | CD34 antigen                                   | 10.16 ± 0.08       | 9.83 ± 0.05 | 10.29 ± 0.07 | 9.74 ± 0.06 | 0.56799              | 2.6E-05  | 0.07776 |
| TC0900002189.mm.1 | <a href="#">Cd3e</a>     | CD3 antigen, epsilon polypeptide               | 5.61 ± 0.06        | 5.99 ± 0.11 | 5.52 ± 0.08  | 6.02 ± 0.12 | 0.67908              | 0.00048  | 0.42825 |
| TC0900002188.mm.1 | <a href="#">Cd3g</a>     | CD3 antigen, gamma polypeptide                 | 5.02 ± 0.05        | 5.61 ± 0.13 | 5 ± 0.08     | 5.53 ± 0.22 | 0.61454              | 0.00115  | 0.94104 |
| TC0600003124.mm.1 | <a href="#">Cd4</a>      | CD4 antigen                                    | 5.14 ± 0.03        | 5.76 ± 0.24 | 5.15 ± 0.03  | 5.65 ± 0.27 | 0.78198              | 0.00585  | 0.7109  |
| TC0200004219.mm.1 | <a href="#">Cd44</a>     | CD44 antigen                                   | 7.21 ± 0.05        | 7.18 ± 0.06 | 7.04 ± 0.07  | 6.86 ± 0.02 | 0.00089              | 0.15011  | 0.1036  |
| TC1900001113.mm.1 | <a href="#">Cd5</a>      | CD5 antigen                                    | 5.55 ± 0.05        | 5.79 ± 0.03 | 5.66 ± 0.07  | 5.83 ± 0.07 | 0.29826              | 0.00536  | 0.80215 |
| TC1900001114.mm.1 | <a href="#">Cd6</a>      | CD6 antigen                                    | 5.48 ± 0.03        | 5.74 ± 0.04 | 5.56 ± 0.03  | 5.72 ± 0.07 | 0.63002              | 0.00049  | 0.2886  |
| TC1100003055.mm.1 | <a href="#">Cd68</a>     | CD68 antigen                                   | 7.33 ± 0.15        | 6.94 ± 0.09 | 7.17 ± 0.05  | 6.82 ± 0.07 | 0.2611               | 0.00607  | 0.93    |
| TC1100004240.mm.1 | <a href="#">Cd7</a>      | CD7 antigen                                    | 4.84 ± 0.02        | 5 ± 0.04    | 4.94 ± 0.02  | 4.77 ± 0.07 | 0.11357              | 0.86579  | 0.00236 |
| TC1600000553.mm.1 | <a href="#">Cd80</a>     | CD80 antigen                                   | 5.23 ± 0.04        | 5.19 ± 0.03 | 5.56 ± 0.13  | 5.11 ± 0.05 | 0.14682              | 0.00302  | 0.01687 |
| TC0600000827.mm.1 | <a href="#">Cd8a</a>     | CD8 antigen, alpha chain                       | 5.03 ± 0.07        | 6.06 ± 0.36 | 5.17 ± 0.05  | 5.99 ± 0.3  | 0.97853              | 0.00156  | 0.72349 |
| TC0600000826.mm.1 | <a href="#">Cd8b1</a>    | CD8 antigen, beta chain 1                      | 5.76 ± 0.06        | 6.64 ± 0.3  | 5.84 ± 0.07  | 6.53 ± 0.39 | 0.88736              | 0.00644  | 0.74355 |
| TC1900000112.mm.1 | <a href="#">Cdc42bpg</a> | CDC42 binding protein kinase gamma (DMPK-like) | 6.78 ± 0.01        | 6.9 ± 0.01  | 6.91 ± 0.02  | 6.97 ± 0.04 | 0.00132              | 0.00382  | 0.33052 |
| TC0300000894.mm.1 | <a href="#">Cdc42se1</a> | CDC42 small effector 1                         | 7.95 ± 0.05        | 8.09 ± 0.01 | 8.04 ± 0.02  | 7.98 ± 0.01 | 0.86602              | 0.16796  | 0.00556 |
| TC0200001056.mm.1 | <a href="#">Cdca7</a>    | cell division cycle associated 7               | 5.14 ± 0.03        | 5.35 ± 0.08 | 5.25 ± 0.03  | 5.34 ± 0.05 | 0.26285              | 0.00817  | 0.2075  |
| TC0800001414.mm.1 | <a href="#">Cdh13</a>    | cadherin 13                                    | 9.49 ± 0.12        | 9.69 ± 0.07 | 9.66 ± 0.09  | 9.32 ± 0.06 | 0.42015              | 0.5747   | 0.00887 |
| TC0100002916.mm.1 | <a href="#">Cdh19</a>    | cadherin 19, type 2                            | 8.22 ± 0.49        | 6.78 ± 0.25 | 6.53 ± 0.25  | 7.68 ± 0.3  | 0.53099              | 0.97265  | 0.0086  |
| TC0800001253.mm.1 | <a href="#">Cdh3</a>     | cadherin 3                                     | 6.68 ± 0.05        | 6.91 ± 0.02 | 6.94 ± 0.07  | 6.76 ± 0.04 | 0.27565              | 0.64171  | 0.00089 |
| TC1300000781.mm.1 | <a href="#">Cdk20</a>    | cyclin-dependent kinase 20                     | 5.94 ± 0.04        | 5.96 ± 0.05 | 6.16 ± 0.04  | 6.07 ± 0.03 | 0.00237              | 0.31063  | 0.3557  |

Supplemental Table I

| Probe Set ID      | Symbol                    | Annotations<br>Description                                      | Summary Statistics |             |             |              | 2 way ANOVA p-values |          |         |
|-------------------|---------------------------|-----------------------------------------------------------------|--------------------|-------------|-------------|--------------|----------------------|----------|---------|
|                   |                           |                                                                 | XY sh              | XY Or       | XX sh       | XX Or        | XY vs XX             | Sh vs Or | Intrxn  |
| TC0400002847.mm.1 | <a href="#">Cdk5rap2</a>  | CDK5 regulatory subunit associated protein 2                    | 6.84 ± 0.03        | 6.93 ± 0.02 | 7.02 ± 0.03 | 6.88 ± 0.04  | 0.0656               | 0.3803   | 0.00333 |
| TC0500000008.mm.1 | <a href="#">Cdk6</a>      | cyclin-dependent kinase 6                                       | 7.22 ± 0.07        | 7.32 ± 0.04 | 7.09 ± 0.07 | 7.08 ± 0.05  | 0.00902              | 0.48219  | 0.41566 |
| TC0700004585.mm.1 | <a href="#">Cdkn1c</a>    | cyclin-dependent kinase inhibitor 1C (P57)                      | 7.74 ± 0.04        | 7.86 ± 0    | 7.96 ± 0.02 | 7.87 ± 0.01  | 0.00078              | 0.67282  | 0.00209 |
| TC0400000917.mm.1 | <a href="#">CDKN2B-AS</a> | CDKN2B antisense RNA 1 intronic conserved region                | 5.42 ± 0.04        | 5.65 ± 0.09 | 5.4 ± 0.03  | 5.66 ± 0.1   | 0.79293              | 0.00448  | 0.7175  |
| TC1300000405.mm.1 | <a href="#">Cdy1</a>      | chromodomain protein, Y chromosome-like                         | 6.48 ± 0.04        | 6.63 ± 0.02 | 6.57 ± 0.01 | 6.53 ± 0.02  | 0.9091               | 0.04999  | 0.00489 |
| TC0700000652.mm.1 | <a href="#">Cebpa</a>     | CCAAT/enhancer binding protein (C/EBP), alpha                   | 8.98 ± 0.2         | 8.64 ± 0.16 | 8.57 ± 0.23 | 9.2 ± 0.04   | 0.96147              | 0.76915  | 0.00648 |
| TC0600003042.mm.1 | <a href="#">Cecr5</a>     | cat eye syndrome chromosome region, candidate 5                 | 6.29 ± 0.02        | 6.34 ± 0.01 | 6.28 ± 0.03 | 6.42 ± 0.05  | 0.34665              | 0.00605  | 0.09855 |
| TC1100001816.mm.1 | <a href="#">Cep112</a>    | centrosomal protein 112                                         | 6.29 ± 0.04        | 6.41 ± 0.03 | 6.49 ± 0.05 | 6.33 ± 0.05  | 0.13595              | 0.80385  | 0.00363 |
| TC1200002150.mm.1 | <a href="#">Cep128</a>    | centrosomal protein 128                                         | 5.96 ± 0.05        | 6.09 ± 0.04 | 6.12 ± 0.05 | 5.99 ± 0.05  | 0.36452              | 0.87654  | 0.00869 |
| TC0800002698.mm.1 | <a href="#">Ces1a</a>     | carboxylesterase 1A                                             | 5.31 ± 0.05        | 5.45 ± 0.03 | 5.33 ± 0.05 | 5.58 ± 0.06  | 0.3189               | 0.00418  | 0.16735 |
| TC0800002702.mm.1 | <a href="#">Ces1d</a>     | carboxylesterase 1D                                             | 9.03 ± 0.23        | 8.87 ± 0.26 | 8.5 ± 0.24  | 9.53 ± 0.06  | 0.89326              | 0.13846  | 0.00729 |
| TC1700002816.mm.1 | <a href="#">Cfb</a>       | complement factor B                                             | 8.68 ± 0.04        | 8.45 ± 0.11 | 8.49 ± 0.06 | 8.13 ± 0.09  | 0.00435              | 0.00155  | 0.4804  |
| TC1200001757.mm.1 | <a href="#">Cfl2</a>      | cofilin 2, muscle                                               | 9.36 ± 0.04        | 9.41 ± 0.04 | 9.32 ± 0.01 | 9.22 ± 0.04  | 0.00837              | 0.61154  | 0.04299 |
| TC0X00001934.mm.1 | <a href="#">Cfp</a>       | complement factor properdin                                     | 7.64 ± 0.03        | 7.27 ± 0.1  | 7.47 ± 0.03 | 7.25 ± 0.07  | 0.22665              | 0.00058  | 0.35255 |
| TC0800000133.mm.1 | <a href="#">Champ1</a>    | chromosome alignment maintaining phosphoprotein 1               | 7.1 ± 0.02         | 7.17 ± 0.02 | 7.18 ± 0.02 | 7.14 ± 0.01  | 0.17027              | 0.68437  | 0.01    |
| TC0600001171.mm.1 | <a href="#">Chl1</a>      | cell adhesion molecule with homology to L1CAM                   | 7.8 ± 0.58         | 6.46 ± 0.32 | 6.01 ± 0.16 | 7.47 ± 0.23  | 0.52955              | 0.64459  | 0.00797 |
| TC0200001773.mm.1 | <a href="#">Chp1</a>      | calcineurin-like EF hand protein 1                              | 8.97 ± 0.06        | 8.78 ± 0.06 | 8.76 ± 0.04 | 8.87 ± 0.03  | 0.15771              | 0.31169  | 0.00642 |
| TC0500000219.mm.1 | <a href="#">Chpf2</a>     | chondroitin polymerizing factor 2                               | 6.99 ± 0.02        | 7.02 ± 0.01 | 7.07 ± 0.02 | 7.01 ± 0.01  | 0.02344              | 0.57673  | 0.00409 |
| TC0X00003113.mm.1 | <a href="#">Chrd1</a>     | chordin-like 1                                                  | 9.16 ± 0.16        | 8.65 ± 0.03 | 9.27 ± 0.13 | 8.64 ± 0.16  | 0.48045              | 0.00226  | 0.42429 |
| TC1400000944.mm.1 | <a href="#">Chrna2</a>    | cholinergic receptor, nicotinic, alpha polypeptide 2 (neuronal) | 4.47 ± 0.05        | 4.63 ± 0.02 | 4.59 ± 0.02 | 4.89 ± 0.11  | 0.01806              | 0.00672  | 0.17616 |
| TC0500000630.mm.1 | <a href="#">Chrna9</a>    | cholinergic receptor, nicotinic, alpha polypeptide 9            | 4 ± 0.02           | 4.11 ± 0.04 | 4.05 ± 0.01 | 4.19 ± 0.06  | 0.10618              | 0.00438  | 0.57301 |
| TC0200001441.mm.1 | <a href="#">Chst1</a>     | carbohydrate (keratan sulfate Gal-6) sulfotransferase 1         | 7.13 ± 0.18        | 6.38 ± 0.07 | 6.18 ± 0.09 | 6.5 ± 0.08   | 0.0113               | 0.19362  | 0.00207 |
| TC0100002229.mm.1 | <a href="#">Chst10</a>    | carbohydrate sulfotransferase 10                                | 5.59 ± 0.03        | 5.68 ± 0.02 | 5.6 ± 0.02  | 5.62 ± 0.02  | 0.6501               | 0.00994  | 0.07928 |
| TC0200001751.mm.1 | <a href="#">Chst14</a>    | carbohydrate (N-acetylgalactosamine 4-O) sulfotransferase 14    | 7.24 ± 0.03        | 7.36 ± 0.02 | 7.41 ± 0.06 | 7.28 ± 0.02  | 0.195                | 0.81619  | 0.00315 |
| TC1800000599.mm.1 | <a href="#">Chsy3</a>     | chondroitin sulfate synthase 3                                  | 5.36 ± 0.08        | 5.65 ± 0.05 | 5.54 ± 0.03 | 5.4 ± 0.01   | 0.59306              | 0.20141  | 0.00194 |
| TC0600002920.mm.1 | <a href="#">Cidec</a>     | cell death-inducing DFFA-like effector c                        | 10.46 ± 0.14       | 9.83 ± 0.19 | 9.42 ± 0.22 | 10.26 ± 0.02 | 0.04953              | 0.71503  | 0.00032 |
| TC0900000834.mm.1 | <a href="#">Cilp</a>      | cartilage intermediate layer protein, nucleotide pyrophosphoh   | 6.49 ± 0.04        | 6.31 ± 0.07 | 6.5 ± 0.07  | 6.26 ± 0.06  | 0.97643              | 0.00408  | 0.4736  |
| TC0800002374.mm.1 | <a href="#">Cilp2</a>     | cartilage intermediate layer protein 2                          | 6.3 ± 0.01         | 6.51 ± 0.02 | 6.42 ± 0.04 | 6.56 ± 0.09  | 0.08462              | 0.00247  | 0.39186 |
| TC1200002396.mm.1 | <a href="#">Cinp</a>      | cyclin-dependent kinase 2 interacting protein                   | 6.49 ± 0.03        | 6.49 ± 0.03 | 6.42 ± 0.02 | 6.39 ± 0.02  | 0.00866              | 0.4384   | 0.88636 |
| TC0200000577.mm.1 | <a href="#">Ciz1</a>      | CDKN1A interacting zinc finger protein 1                        | 7.6 ± 0.03         | 7.67 ± 0.01 | 7.71 ± 0.02 | 7.65 ± 0.01  | 0.052                | 0.80081  | 0.00398 |
| TC0300002352.mm.1 | <a href="#">Cks1b</a>     | CDC28 protein kinase 1b                                         | 6.8 ± 0.04         | 7.02 ± 0.03 | 6.95 ± 0.04 | 6.93 ± 0.04  | 0.3953               | 0.0191   | 0.00448 |
| TC0700002489.mm.1 | <a href="#">Clasrp</a>    | CLK4-associating serine/arginine rich protein                   | 6.78 ± 0.02        | 6.9 ± 0.02  | 6.87 ± 0.01 | 6.92 ± 0.04  | 0.05347              | 0.00572  | 0.31499 |



Supplemental Table I

| Probe Set ID      | Symbol                  | Annotations<br>Description                              | Summary Statistics |              |              |              | 2 way ANOVA p-values |          |         |
|-------------------|-------------------------|---------------------------------------------------------|--------------------|--------------|--------------|--------------|----------------------|----------|---------|
|                   |                         |                                                         | XY sh              | XY Or        | XX sh        | XX Or        | XY vs XX             | Sh vs Or | Intrxn  |
| TC1400001288.mm.1 | <a href="#">Cldn10</a>  | claudin 10                                              | 5.48 ± 0.04        | 5.28 ± 0.05  | 5.57 ± 0.08  | 5.26 ± 0.05  | 0.49029              | 0.00071  | 0.25109 |
| TC0400001330.mm.1 | <a href="#">Cldn19</a>  | claudin 19                                              | 5.82 ± 0.09        | 5.65 ± 0.05  | 5.48 ± 0.09  | 6 ± 0.14     | 0.72415              | 0.05226  | 0.0051  |
| TC1600001168.mm.1 | <a href="#">Cldn26</a>  | claudin 26                                              | 6.11 ± 0.02        | 6.22 ± 0.02  | 6.29 ± 0.04  | 6.3 ± 0.03   | 0.00098              | 0.05784  | 0.15857 |
| TC1100000942.mm.1 | <a href="#">Clec10a</a> | C-type lectin domain family 10, member A                | 7.29 ± 0.02        | 7.09 ± 0.06  | 7.19 ± 0.01  | 7.01 ± 0.06  | 0.0291               | 0.00029  | 0.7414  |
| TC0900001658.mm.1 | <a href="#">Clec3b</a>  | C-type lectin domain family 3, member b                 | 9.13 ± 0.1         | 8.84 ± 0.04  | 9.14 ± 0.06  | 8.73 ± 0.11  | 0.88895              | 0.00351  | 0.27835 |
| TC0600001397.mm.1 | <a href="#">Clec4a1</a> | C-type lectin domain family 4, member a1                | 6.82 ± 0.05        | 6.5 ± 0.06   | 6.62 ± 0.04  | 6.22 ± 0.09  | 0.0015               | 5.3E-05  | 0.54584 |
| TC0600001401.mm.1 | <a href="#">Clec4a2</a> | C-type lectin domain family 4, member a2                | 4.77 ± 0.06        | 4.59 ± 0.09  | 4.71 ± 0.05  | 4.43 ± 0.08  | 0.21205              | 0.00843  | 0.37628 |
| TC0600001398.mm.1 | <a href="#">Clec4a3</a> | C-type lectin domain family 4, member a3                | 6.41 ± 0.07        | 6.1 ± 0.13   | 6.37 ± 0.11  | 5.79 ± 0.19  | 0.19316              | 0.00416  | 0.3185  |
| TC0600001400.mm.1 | <a href="#">Clec4b1</a> | C-type lectin domain family 4, member b1                | 4.74 ± 0.07        | 4.46 ± 0.08  | 4.6 ± 0.05   | 4.4 ± 0.12   | 0.2199               | 0.00927  | 0.60192 |
| TC0600002142.mm.1 | <a href="#">Clec5a</a>  | C-type lectin domain family 5, member a                 | 4.78 ± 0.08        | 4.55 ± 0.06  | 4.76 ± 0.13  | 4.29 ± 0.03  | 0.15846              | 0.00142  | 0.12067 |
| TC1200002296.mm.1 | <a href="#">Clmn</a>    | calmin                                                  | 6.53 ± 0.08        | 6.27 ± 0.07  | 6.26 ± 0.06  | 6.41 ± 0.02  | 0.33323              | 0.42471  | 0.00898 |
| TC0500002628.mm.1 | <a href="#">Clock</a>   | circadian locomotor output cycles kaput                 | 9.59 ± 0.11        | 9.42 ± 0.09  | 9.95 ± 0.04  | 9.31 ± 0.11  | 0.30049              | 0.00079  | 0.05494 |
| TC1700000482.mm.1 | <a href="#">Clpsl2</a>  | colipase-like 2                                         | 5.82 ± 0.05        | 5.99 ± 0.05  | 5.87 ± 0.07  | 6.09 ± 0.08  | 0.29489              | 0.00956  | 0.61393 |
| TC0700002492.mm.1 | <a href="#">Clptm1</a>  | cleft lip and palate associated transmembrane protein 1 | 9.49 ± 0.06        | 9.4 ± 0.04   | 9.38 ± 0.04  | 9.53 ± 0.02  | 0.7104               | 0.88789  | 0.00531 |
| TC1300000884.mm.1 | <a href="#">Clptm1l</a> | CLPTM1-like                                             | 9.22 ± 0.01        | 9.11 ± 0.03  | 9.21 ± 0.03  | 9.05 ± 0.07  | 0.38604              | 0.00382  | 0.54878 |
| TC1100003455.mm.1 | <a href="#">Cltc</a>    | clathrin, heavy polypeptide (Hc)                        | 10.81 ± 0.04       | 10.64 ± 0.03 | 10.68 ± 0.03 | 10.49 ± 0.08 | 0.02554              | 0.0052   | 0.61619 |
| TC1500000207.mm.1 | <a href="#">Cmb1</a>    | carboxymethylenebutenolidase-like (Pseudomonas)         | 8.49 ± 0.23        | 7.89 ± 0.23  | 7.58 ± 0.18  | 8.3 ± 0.14   | 0.18827              | 0.93297  | 0.00461 |
| TC0600003598.mm.1 | <a href="#">Cml3</a>    | camello-like 3                                          | 5.66 ± 0.05        | 5.9 ± 0.04   | 5.7 ± 0.06   | 5.83 ± 0.08  | 0.79063              | 0.00628  | 0.35056 |
| TC0800001181.mm.1 | <a href="#">Cmtm2b</a>  | CKLF-like MARVEL transmembrane domain containing 2B     | 4.5 ± 0.06         | 4.75 ± 0.02  | 4.61 ± 0.02  | 4.68 ± 0.07  | 0.61899              | 0.0054   | 0.06998 |
| TC1300002429.mm.1 | <a href="#">Cmya5</a>   | cardiomyopathy associated 5                             | 5.61 ± 0.04        | 5.73 ± 0.02  | 5.76 ± 0.03  | 5.66 ± 0.05  | 0.18594              | 0.69672  | 0.00921 |
| TC0100000247.mm.1 | <a href="#">Cnm3</a>    | cyclin M3                                               | 6.73 ± 0.02        | 6.69 ± 0.03  | 6.79 ± 0.03  | 6.69 ± 0.02  | 0.24812              | 0.00916  | 0.2687  |
| TC0600001176.mm.1 | <a href="#">Cntn6</a>   | contactin 6                                             | 4.75 ± 0.05        | 4.97 ± 0.03  | 5.27 ± 0.05  | 4.62 ± 0.05  | 0.08596              | 0.00062  | 6.6E-07 |
| TC0800001323.mm.1 | <a href="#">Cog4</a>    | component of oligomeric golgi complex 4                 | 8.39 ± 0.07        | 8.22 ± 0.06  | 8.11 ± 0.07  | 8.28 ± 0.02  | 0.03126              | 0.68501  | 0.00579 |
| TC0900002735.mm.1 | <a href="#">Col12a1</a> | collagen, type XII, alpha 1                             | 6.71 ± 0.07        | 6.66 ± 0.03  | 6.85 ± 0.12  | 6.38 ± 0.05  | 0.2958               | 0.00291  | 0.02294 |
| TC1500000395.mm.1 | <a href="#">Col14a1</a> | collagen, type XIV, alpha 1                             | 9.85 ± 0.06        | 10.33 ± 0.04 | 9.82 ± 0.08  | 9.99 ± 0.07  | 0.02273              | 8.9E-05  | 0.01479 |
| TC0400000518.mm.1 | <a href="#">Col15a1</a> | collagen, type XV, alpha 1                              | 8.8 ± 0.07         | 8.88 ± 0.08  | 8.64 ± 0.04  | 8.38 ± 0.05  | 0.00039              | 0.28867  | 0.00977 |
| TC0100002073.mm.1 | <a href="#">Col19a1</a> | collagen, type XIX, alpha 1                             | 6.61 ± 0.06        | 6.69 ± 0.02  | 6.89 ± 0.08  | 6.58 ± 0.06  | 0.14826              | 0.09834  | 0.00469 |
| TC1100001448.mm.1 | <a href="#">Col1a1</a>  | collagen, type I, alpha 1                               | 11.09 ± 0.11       | 10.8 ± 0.09  | 10.63 ± 0.07 | 10.08 ± 0.07 | 5.9E-05              | 0.00151  | 0.08205 |
| TC0600000010.mm.1 | <a href="#">Col1a2</a>  | collagen, type I, alpha 2                               | 11.39 ± 0.11       | 11.22 ± 0.07 | 11.13 ± 0.08 | 10.61 ± 0.09 | 0.00094              | 0.00611  | 0.03257 |
| TC1100000566.mm.1 | <a href="#">Col23a1</a> | collagen, type XXIII, alpha 1                           | 6.93 ± 0.03        | 7.13 ± 0.03  | 7.06 ± 0.03  | 7.13 ± 0.05  | 0.0759               | 0.00198  | 0.0654  |
| TC0100000343.mm.1 | <a href="#">Col3a1</a>  | collagen, type III, alpha 1                             | 11.41 ± 0.1        | 11.23 ± 0.04 | 11.11 ± 0.07 | 10.44 ± 0.13 | 0.00019              | 0.00192  | 0.00942 |
| TC0800001696.mm.1 | <a href="#">Col4a1</a>  | collagen, type IV, alpha 1                              | 9.65 ± 0.08        | 9.43 ± 0.02  | 9.57 ± 0.05  | 9.08 ± 0.04  | 0.00552              | 8.6E-05  | 0.02157 |

Supplemental Table I

| Probe Set ID      | Symbol                  | Annotations<br>Description                                            | Summary Statistics |              |              |              | 2 way ANOVA p-values |          |         |
|-------------------|-------------------------|-----------------------------------------------------------------------|--------------------|--------------|--------------|--------------|----------------------|----------|---------|
|                   |                         |                                                                       | XY sh              | XY Or        | XX sh        | XX Or        | XY vs XX             | Sh vs Or | Intrxn  |
| TC080000088.mm.1  | <a href="#">Col4a2</a>  | collagen, type IV, alpha 2                                            | 9.83 ± 0.08        | 9.65 ± 0.01  | 9.75 ± 0.06  | 9.32 ± 0.05  | 0.01081              | 0.00061  | 0.04518 |
| TC0X00001394.mm.1 | <a href="#">Col4a5</a>  | collagen, type IV, alpha 5                                            | 8.05 ± 0.14        | 8.17 ± 0.07  | 8.13 ± 0.09  | 7.58 ± 0.1   | 0.06103              | 0.10846  | 0.00559 |
| TC0X00003083.mm.1 | <a href="#">Col4a6</a>  | collagen, type IV, alpha 6                                            | 7.31 ± 0.14        | 7.58 ± 0.08  | 7.48 ± 0.07  | 7.08 ± 0.07  | 0.15806              | 0.61406  | 0.0052  |
| TC0100002278.mm.1 | <a href="#">Col5a2</a>  | collagen, type V, alpha 2                                             | 8.41 ± 0.11        | 8.3 ± 0.03   | 8.23 ± 0.07  | 7.72 ± 0.05  | 0.00078              | 0.00465  | 0.01324 |
| TC1000002406.mm.1 | <a href="#">Col6a1</a>  | collagen, type VI, alpha 1                                            | 9.91 ± 0.09        | 9.77 ± 0.05  | 9.8 ± 0.06   | 9.36 ± 0.07  | 0.00729              | 0.00306  | 0.02607 |
| TC1000002405.mm.1 | <a href="#">Col6a2</a>  | collagen, type VI, alpha 2                                            | 9.53 ± 0.1         | 9.42 ± 0.06  | 9.46 ± 0.07  | 8.99 ± 0.06  | 0.01621              | 0.00605  | 0.01439 |
| TC0100002789.mm.1 | <a href="#">Col6a3</a>  | collagen, type VI, alpha 3                                            | 9.37 ± 0.1         | 9.35 ± 0.06  | 9.19 ± 0.07  | 8.87 ± 0.06  | 0.00246              | 0.09988  | 0.03633 |
| TC0100000393.mm.1 | <a href="#">Coq10b</a>  | coenzyme Q10 homolog B ( <i>S. cerevisiae</i> )                       | 7.98 ± 0.08        | 8.28 ± 0.03  | 7.5 ± 0.09   | 8 ± 0.12     | 0.00064              | 0.00029  | 0.31344 |
| TC0300000137.mm.1 | <a href="#">Cp</a>      | ceruloplasmin                                                         | 9.19 ± 0.08        | 8.69 ± 0.11  | 9 ± 0.04     | 8.6 ± 0.19   | 0.37584              | 0.00274  | 0.84823 |
| TC0300001707.mm.1 | <a href="#">Cpb1</a>    | carboxypeptidase B1 (tissue)                                          | 5.93 ± 0.11        | 5.93 ± 0.05  | 6.37 ± 0.13  | 5.67 ± 0.17  | 0.34704              | 0.02383  | 0.00913 |
| TC0700003608.mm.1 | <a href="#">Cpeb1</a>   | cytoplasmic polyadenylation element binding protein 1                 | 6.71 ± 0.11        | 6.5 ± 0.01   | 6.3 ± 0.04   | 6.64 ± 0.03  | 0.13311              | 0.23354  | 0.00371 |
| TC0800001112.mm.1 | <a href="#">Cpne2</a>   | copine II                                                             | 9.02 ± 0.06        | 8.92 ± 0.02  | 9.1 ± 0.03   | 8.81 ± 0.09  | 0.79158              | 0.00883  | 0.04695 |
| TC0400000439.mm.1 | <a href="#">Creb3</a>   | cAMP responsive element binding protein 3                             | 8.13 ± 0.04        | 8.1 ± 0.02   | 8.03 ± 0.02  | 7.96 ± 0.03  | 0.00706              | 0.33276  | 0.21679 |
| TC0200004133.mm.1 | <a href="#">Creb3l1</a> | cAMP responsive element binding protein 3-like 1                      | 8.87 ± 0.11        | 8.72 ± 0.07  | 9.02 ± 0.08  | 8.45 ± 0.1   | 0.71523              | 0.0035   | 0.03012 |
| TC0600002325.mm.1 | <a href="#">Crrh2</a>   | corticotropin releasing hormone receptor 2                            | 6.65 ± 0.04        | 6.89 ± 0.03  | 7.03 ± 0.05  | 6.91 ± 0.04  | 0.00037              | 0.18756  | 0.00093 |
| TC1200001282.mm.1 | <a href="#">Crip1</a>   | cysteine-rich protein 1 (intestinal)                                  | 10.03 ± 0.06       | 10.19 ± 0.05 | 10.29 ± 0.09 | 9.96 ± 0.1   | 0.59702              | 0.45146  | 0.0039  |
| TC1100003339.mm.1 | <a href="#">Crlf3</a>   | cytokine receptor-like factor 3                                       | 7 ± 0.02           | 7.09 ± 0.02  | 7.01 ± 0.01  | 7.07 ± 0.03  | 0.90152              | 0.00164  | 0.52929 |
| TC0900003168.mm.1 | <a href="#">Crtap</a>   | cartilage associated protein                                          | 9.46 ± 0.07        | 9.61 ± 0.03  | 9.68 ± 0.05  | 9.42 ± 0.1   | 0.85571              | 0.41185  | 0.00798 |
| TC1000002605.mm.1 | <a href="#">Cry1</a>    | cryptochrome 1 (photolyase-like)                                      | 6.33 ± 0.05        | 6.7 ± 0.05   | 6.68 ± 0.12  | 6.51 ± 0.01  | 0.30881              | 0.2109   | 0.00184 |
| TC0200004140.mm.1 | <a href="#">Cry2</a>    | cryptochrome 2 (photolyase-like)                                      | 7.48 ± 0.04        | 7.6 ± 0.06   | 7.32 ± 0.05  | 7.58 ± 0.04  | 0.10318              | 0.00058  | 0.17066 |
| TC0900000605.mm.1 | <a href="#">Cryab</a>   | crystallin, alpha B                                                   | 9.18 ± 0.1         | 9.23 ± 0.06  | 9.31 ± 0.06  | 8.94 ± 0.03  | 0.44147              | 0.08068  | 0.00515 |
| TC1600001805.mm.1 | <a href="#">Crybg3</a>  | beta-gamma crystallin domain containing 3                             | 7.97 ± 0.12        | 7.69 ± 0.08  | 8.08 ± 0.04  | 7.48 ± 0.13  | 0.58478              | 0.00073  | 0.14687 |
| TC1500002285.mm.1 | <a href="#">Csad</a>    | cysteine sulfinic acid decarboxylase                                  | 8.1 ± 0.11         | 7.99 ± 0.11  | 7.97 ± 0.06  | 8.36 ± 0.03  | 0.49743              | 0.35682  | 0.00491 |
| TC1800000625.mm.1 | <a href="#">Csf1r</a>   | colony stimulating factor 1 receptor                                  | 8.89 ± 0.05        | 8.66 ± 0.07  | 9 ± 0.07     | 8.62 ± 0.07  | 0.52993              | 0.00042  | 0.19233 |
| TC0500002214.mm.1 | <a href="#">Ctbp1</a>   | C-terminal binding protein 1                                          | 9.13 ± 0.02        | 9.06 ± 0.03  | 9.1 ± 0.02   | 8.98 ± 0.05  | 0.10942              | 0.00884  | 0.54546 |
| TC1000000215.mm.1 | <a href="#">Ctgf</a>    | connective tissue growth factor                                       | 10.71 ± 0.2        | 11.19 ± 0.08 | 11.14 ± 0.13 | 10.57 ± 0.11 | 0.46434              | 0.7291   | 0.00385 |
| TC0400003437.mm.1 | <a href="#">Ctps</a>    | cytidine 5-triphosphate synthase                                      | 7.97 ± 0.1         | 7.94 ± 0.1   | 7.78 ± 0.08  | 7.43 ± 0.1   | 0.00707              | 0.14267  | 0.06854 |
| TC0700001258.mm.1 | <a href="#">Ctsc</a>    | cathepsin C                                                           | 9.16 ± 0.06        | 8.75 ± 0.07  | 9.07 ± 0.05  | 8.55 ± 0.17  | 0.19882              | 0.00036  | 0.43432 |
| TC0300000635.mm.1 | <a href="#">Ctso</a>    | cathepsin O                                                           | 7.81 ± 0.05        | 7.58 ± 0.09  | 7.76 ± 0.05  | 7.45 ± 0.13  | 0.34328              | 0.0099   | 0.5882  |
| TC0300000903.mm.1 | <a href="#">Ctss</a>    | cathepsin S                                                           | 9.29 ± 0.15        | 9.13 ± 0.18  | 8.85 ± 0.08  | 8.49 ± 0.15  | 0.00283              | 0.1011   | 0.5242  |
| TC1100003653.mm.1 | <a href="#">Cwc25</a>   | CWC25 spliceosome-associated protein homolog ( <i>S. cerevisiae</i> ) | 6.39 ± 0.03        | 6.48 ± 0.02  | 6.45 ± 0.02  | 6.42 ± 0.01  | 0.46784              | 0.07496  | 0.00529 |
| TC0800001119.mm.1 | <a href="#">Cx3cl1</a>  | chemokine (C-X3-C motif) ligand 1                                     | 6.48 ± 0.06        | 6.55 ± 0.01  | 6.73 ± 0.02  | 6.53 ± 0.02  | 0.00819              | 0.17815  | 0.00267 |



Supplemental Table I

| Probe Set ID      | Symbol                     | Annotations<br>Description                                    | Summary Statistics |              |              |              | 2 way ANOVA p-values |          |         |
|-------------------|----------------------------|---------------------------------------------------------------|--------------------|--------------|--------------|--------------|----------------------|----------|---------|
|                   |                            |                                                               | XY sh              | XY Or        | XX sh        | XX Or        | XY vs XX             | Sh vs Or | Intrxn  |
| TC050000922.mm.1  | <a href="#">Cxcl13</a>     | chemokine (C-X-C motif) ligand 13                             | 9.21 ± 0.24        | 6.86 ± 0.24  | 8.08 ± 0.17  | 6.65 ± 0.37  | 0.03977              | 1.2E-05  | 0.15663 |
| TC0X00002242.mm.1 | <a href="#">Cxx1b</a>      | CAAX box 1B                                                   | 8.67 ± 0.06        | 8.3 ± 0.08   | 8.63 ± 0.04  | 8.37 ± 0.06  | 0.74714              | 0.00026  | 0.42947 |
| TC1500001967.mm.1 | <a href="#">Cyb5r3</a>     | cytochrome b5 reductase 3                                     | 8.76 ± 0.05        | 8.83 ± 0.01  | 8.88 ± 0.05  | 8.71 ± 0.03  | 0.6885               | 0.39845  | 0.00662 |
| TC0800003068.mm.1 | <a href="#">Cyba</a>       | cytochrome b-245, alpha polypeptide                           | 7.59 ± 0.05        | 7.64 ± 0.02  | 7.66 ± 0.02  | 7.45 ± 0.05  | 0.32067              | 0.15732  | 0.00291 |
| TC0700000933.mm.1 | <a href="#">Cyfip1</a>     | cytoplasmic FMR1 interacting protein 1                        | 8.63 ± 0.05        | 8.54 ± 0.02  | 8.61 ± 0.03  | 8.38 ± 0.07  | 0.09899              | 0.00481  | 0.12129 |
| TC1700002571.mm.1 | <a href="#">Cyp1b1</a>     | cytochrome P450, family 1, subfamily b, polypeptide 1         | 9.52 ± 0.14        | 9.32 ± 0.1   | 9.79 ± 0.08  | 9.01 ± 0.16  | 0.85878              | 0.00363  | 0.0207  |
| TC0600002592.mm.1 | <a href="#">Cyp26b1</a>    | cytochrome P450, family 26, subfamily b, polypeptide 1        | 6.14 ± 0.09        | 6.53 ± 0.08  | 6.44 ± 0.09  | 6.58 ± 0.07  | 0.0374               | 0.00492  | 0.11351 |
| TC0700000430.mm.1 | <a href="#">Cyp2b10</a>    | cytochrome P450, family 2, subfamily b, polypeptide 10        | 5.75 ± 0.2         | 4.92 ± 0.09  | 5.23 ± 0.04  | 4.96 ± 0.05  | 0.22451              | 0.00376  | 0.1427  |
| TC0700002023.mm.1 | <a href="#">Cyp2e1</a>     | cytochrome P450, family 2, subfamily e, polypeptide 1         | 12.04 ± 0.25       | 10.44 ± 0.17 | 10.34 ± 0.14 | 10.69 ± 0.27 | 0.01091              | 0.0274   | 0.00137 |
| TC0400003097.mm.1 | <a href="#">Cyp2j6</a>     | cytochrome P450, family 2, subfamily j, polypeptide 6         | 7.52 ± 0.15        | 6.95 ± 0.13  | 7.1 ± 0.09   | 7.41 ± 0.1   | 0.88263              | 0.31847  | 0.00366 |
| TC1700001856.mm.1 | <a href="#">Cyp4f14</a>    | cytochrome P450, family 4, subfamily f, polypeptide 14        | 4.96 ± 0.04        | 5 ± 0.01     | 5.17 ± 0.04  | 5.01 ± 0.01  | 0.00717              | 0.09372  | 0.0125  |
| TC0300003087.mm.1 | <a href="#">Cyr61</a>      | cysteine rich protein 61                                      | 10.88 ± 0.15       | 11.63 ± 0.3  | 11.64 ± 0.13 | 11.18 ± 0.12 | 0.51827              | 0.58817  | 0.00883 |
| TC1200001536.mm.1 | <a href="#">Cys1</a>       | cystin 1                                                      | 6.88 ± 0.08        | 7.37 ± 0.11  | 6.93 ± 0.04  | 7.03 ± 0.02  | 0.14076              | 0.00062  | 0.00905 |
| TC1600001971.mm.1 | <a href="#">Cyyr1</a>      | cysteine and tyrosine-rich protein 1                          | 7.38 ± 0.06        | 7.26 ± 0.1   | 7.04 ± 0.1   | 7.41 ± 0.02  | 0.17353              | 0.22202  | 0.00537 |
| TC1700002317.mm.1 | <a href="#">D17Wsu104e</a> | DNA segment, Chr 17, Wayne State University 104, expressed    | 7.66 ± 0.02        | 7.62 ± 0.01  | 7.62 ± 0.02  | 7.51 ± 0.01  | 0.00281              | 0.00138  | 0.03503 |
| TC1500000031.mm.1 | <a href="#">Dab2</a>       | disabled 2, mitogen-responsive phosphoprotein                 | 8.39 ± 0.06        | 7.97 ± 0.07  | 8.33 ± 0.05  | 8.04 ± 0.09  | 0.84013              | 0.0003   | 0.4928  |
| TC0700000240.mm.1 | <a href="#">Dact3</a>      | dapper homolog 3, antagonist of beta-catenin (xenopus)        | 8.51 ± 0.13        | 8.8 ± 0.08   | 9.01 ± 0.13  | 8.64 ± 0.07  | 0.13225              | 0.78318  | 0.0093  |
| TC1300000735.mm.1 | <a href="#">Dapk1</a>      | death associated protein kinase 1                             | 8.49 ± 0.07        | 8.16 ± 0.12  | 8.56 ± 0.01  | 8.09 ± 0.14  | 0.91657              | 0.00128  | 0.42762 |
| TC0900000865.mm.1 | <a href="#">Dapk2</a>      | death-associated protein kinase 2                             | 7.24 ± 0.06        | 7.45 ± 0.03  | 7.57 ± 0.07  | 7.33 ± 0.04  | 0.06525              | 0.85671  | 0.00099 |
| TC0200000894.mm.1 | <a href="#">Dapl1</a>      | death associated protein-like 1                               | 4.19 ± 0.04        | 4.43 ± 0.05  | 4.24 ± 0.04  | 4.16 ± 0.03  | 0.0087               | 0.14523  | 0.00421 |
| TC0200000467.mm.1 | <a href="#">Dbh</a>        | dopamine beta hydroxylase                                     | 9.84 ± 0.84        | 8.06 ± 0.62  | 6.34 ± 0.52  | 9.88 ± 0.29  | 0.31064              | 0.13275  | 0.00201 |
| TC0700000861.mm.1 | <a href="#">Dbp</a>        | D site albumin promoter binding protein                       | 8.94 ± 0.19        | 9.16 ± 0.16  | 6.98 ± 0.05  | 9.05 ± 0.1   | 2.5E-05              | 1.3E-06  | 8.1E-05 |
| TC1000000465.mm.1 | <a href="#">Dcbld1</a>     | discoïdin, CUB and LCCL domain containing 1                   | 4.6 ± 0.03         | 4.58 ± 0.04  | 4.41 ± 0.05  | 4.55 ± 0.01  | 0.00734              | 0.12793  | 0.03322 |
| TC0200000006.mm.1 | <a href="#">Dclre1c</a>    | DNA cross-link repair 1C, PSO2 homolog (S. cerevisiae)        | 5.75 ± 0.03        | 5.55 ± 0.01  | 5.63 ± 0.03  | 5.44 ± 0.07  | 0.02852              | 0.00101  | 0.94211 |
| TC0300000761.mm.1 | <a href="#">Dcst2</a>      | DC-STAMP domain containing 2                                  | 5.43 ± 0.02        | 5.48 ± 0.03  | 5.37 ± 0.04  | 5.54 ± 0.05  | 0.94723              | 0.00535  | 0.10788 |
| TC0400002477.mm.1 | <a href="#">Dctn3</a>      | dynactin 3                                                    | 8.65 ± 0.1         | 8.29 ± 0.07  | 8.26 ± 0.09  | 8.47 ± 0.04  | 0.22412              | 0.38189  | 0.00345 |
| TC1100004228.mm.1 | <a href="#">Dcyr</a>       | dicarbonyl L-xylulose reductase                               | 6.61 ± 0.04        | 6.66 ± 0.03  | 6.81 ± 0.04  | 6.69 ± 0.01  | 0.00521              | 0.3525   | 0.01933 |
| TC1700000663.mm.1 | <a href="#">Ddah2</a>      | dimethylarginine dimethylaminohydrolase 2                     | 6.93 ± 0.04        | 7.03 ± 0.03  | 7.22 ± 0.05  | 7.1 ± 0.01   | 0.00022              | 0.91292  | 0.0088  |
| TC1100002225.mm.1 | <a href="#">Ddc</a>        | dopa decarboxylase                                            | 7.96 ± 0.68        | 6.59 ± 0.31  | 5.86 ± 0.16  | 7.72 ± 0.25  | 0.44906              | 0.42454  | 0.00617 |
| TC1400001906.mm.1 | <a href="#">Ddhd1</a>      | DDHD domain containing 1                                      | 6.73 ± 0.08        | 6.43 ± 0.06  | 6.38 ± 0.06  | 6.58 ± 0.06  | 0.15335              | 0.43509  | 0.00265 |
| TSUnmapped000000  | <a href="#">Ddit3</a>      | DNA-damage inducible transcript 3 (Ddit3), transcript variant | 7.74 ± 0.04        | 8.02 ± 0.04  | 7.78 ± 0.06  | 7.87 ± 0.03  | 0.19253              | 0.0007   | 0.03858 |
| TC0300001394.mm.1 | <a href="#">Ddit4l</a>     | DNA-damage-inducible transcript 4-like                        | 5.19 ± 0.05        | 5.26 ± 0.04  | 5.42 ± 0.03  | 5.44 ± 0.07  | 0.0021               | 0.4892   | 0.75846 |

Supplemental Table I

| Probe Set ID      | Symbol                   | Annotations<br>Description                                  | Summary Statistics |              |              |              | 2 way ANOVA p-values |          |         |
|-------------------|--------------------------|-------------------------------------------------------------|--------------------|--------------|--------------|--------------|----------------------|----------|---------|
|                   |                          |                                                             | XY sh              | XY Or        | XX sh        | XX Or        | XY vs XX             | Sh vs Or | Intrxn  |
| TC1000002264.mm.1 | <a href="#">Ddx21</a>    | DEAD (Asp-Glu-Ala-Asp) box polypeptide 21                   | 8.52 ± 0.06        | 8.49 ± 0.05  | 8.42 ± 0.02  | 8.28 ± 0.06  | 0.00951              | 0.10611  | 0.30847 |
| TC0X00000166.mm.1 | <a href="#">Ddx3x</a>    | DEAD/H (Asp-Glu-Ala-Asp/His) box polypeptide 3, X-linked    | 10.67 ± 0.05       | 10.71 ± 0.07 | 10.98 ± 0.05 | 10.82 ± 0.05 | 0.00295              | 0.30439  | 0.10246 |
| TC0Y00000235.mm.1 | <a href="#">Ddx3y</a>    | DEAD (Asp-Glu-Ala-Asp) box polypeptide 3, Y-linked          | 8.71 ± 0.1         | 8.64 ± 0.12  | 4.13 ± 0.02  | 4.07 ± 0.04  | 1.1E-16              | 0.31083  | 0.74463 |
| TC0800000261.mm.1 | <a href="#">Defb2</a>    | defensin beta 2                                             | 4.01 ± 0.04        | 4.31 ± 0.05  | 4.17 ± 0.07  | 4.18 ± 0.04  | 0.83292              | 0.00951  | 0.01408 |
| TC0200002287.mm.1 | <a href="#">Defb20</a>   | defensin beta 20                                            | 5.29 ± 0.04        | 5.64 ± 0.03  | 5.35 ± 0.05  | 5.48 ± 0.07  | 0.25528              | 0.00046  | 0.06947 |
| TC0800000209.mm.1 | <a href="#">Defb33</a>   | defensin beta 33                                            | 4.04 ± 0.01        | 4.26 ± 0.05  | 4.15 ± 0.02  | 4.24 ± 0.06  | 0.30044              | 0.00182  | 0.1033  |
| TC0100003709.mm.1 | <a href="#">Degs1</a>    | degenerative spermatocyte homolog 1 (Drosophila)            | 8.35 ± 0.04        | 8.35 ± 0.02  | 8.24 ± 0.04  | 8.22 ± 0.03  | 0.00868              | 0.78072  | 0.45578 |
| TC1200002354.mm.1 | <a href="#">Degs2</a>    | degenerative spermatocyte homolog 2 (Drosophila), lipid des | 5.06 ± 0.01        | 5.19 ± 0.02  | 5.22 ± 0.07  | 5.33 ± 0.06  | 0.0057               | 0.01777  | 0.7202  |
| TC1300001928.mm.1 | <a href="#">Dek</a>      | DEK oncogene (DNA binding)                                  | 8.76 ± 0.08        | 8.96 ± 0.06  | 9.06 ± 0.06  | 8.8 ± 0.1    | 0.2793               | 0.84656  | 0.00975 |
| TC1700002347.mm.1 | <a href="#">Dennd1c</a>  | DENN/MADD domain containing 1C                              | 5.36 ± 0.02        | 5.49 ± 0.03  | 5.43 ± 0.04  | 5.5 ± 0.03   | 0.16646              | 0.00435  | 0.43296 |
| TC0300000787.mm.1 | <a href="#">Dennd4b</a>  | DENN/MADD domain containing 4B                              | 6.7 ± 0.01         | 6.8 ± 0.02   | 6.77 ± 0.01  | 6.8 ± 0.01   | 0.01683              | 0.00036  | 0.0417  |
| TC1500001777.mm.1 | <a href="#">Dgat1</a>    | diacylglycerol O-acyltransferase 1                          | 7.75 ± 0.16        | 7.69 ± 0.14  | 7.35 ± 0.19  | 8.11 ± 0.08  | 0.66183              | 0.08763  | 0.00691 |
| TC1600001301.mm.1 | <a href="#">Dgcr14</a>   | DiGeorge syndrome critical region gene 14                   | 7.61 ± 0.03        | 7.75 ± 0.03  | 7.73 ± 0.02  | 7.71 ± 0.02  | 0.11894              | 0.03502  | 0.00467 |
| TC1600001380.mm.1 | <a href="#">Dgkq</a>     | diacylglycerol kinase, gamma                                | 8.12 ± 0.16        | 7.99 ± 0.1   | 7.56 ± 0.04  | 7.54 ± 0.09  | 0.00285              | 0.9916   | 0.84323 |
| TC1400002476.mm.1 | <a href="#">Dgkh</a>     | diacylglycerol kinase, eta                                  | 6.75 ± 0.05        | 6.69 ± 0.03  | 6.42 ± 0.05  | 6.55 ± 0.05  | 0.00036              | 0.30138  | 0.10459 |
| TC0400001856.mm.1 | <a href="#">Dhrs3</a>    | dehydrogenase/reductase (SDR family) member 3               | 9.31 ± 0.08        | 9.39 ± 0.03  | 9.76 ± 0.03  | 9.23 ± 0.13  | 0.12532              | 0.01187  | 0.00331 |
| TC0100003834.mm.1 | <a href="#">Diexf</a>    | digestive organ expansion factor homolog (zebrafish)        | 6.26 ± 0.01        | 6.34 ± 0.04  | 6.28 ± 0.01  | 6.2 ± 0.03   | 0.02615              | 0.99027  | 0.00488 |
| TC0300001342.mm.1 | <a href="#">Dkk2</a>     | dickkopf homolog 2 (Xenopus laevis)                         | 5.82 ± 0.26        | 5.14 ± 0.03  | 5.19 ± 0.09  | 5.64 ± 0.1   | 0.84624              | 0.62025  | 0.00739 |
| TC0X00000963.mm.1 | <a href="#">Dlq3</a>     | discs, large homolog 3 (Drosophila)                         | 6.71 ± 0.05        | 6.8 ± 0.03   | 6.92 ± 0.07  | 6.68 ± 0.05  | 0.29941              | 0.28395  | 0.00447 |
| TC1700001497.mm.1 | <a href="#">Dll1</a>     | delta-like 1 (Drosophila)                                   | 6.98 ± 0.05        | 7.14 ± 0.09  | 7.31 ± 0.05  | 7.02 ± 0.05  | 0.18798              | 0.25092  | 0.00539 |
| TC1500001878.mm.1 | <a href="#">Dmc1</a>     | DMC1 dosage suppressor of mck1 homolog, meiosis-specific    | 4.43 ± 0.02        | 4.55 ± 0.02  | 4.58 ± 0.03  | 4.52 ± 0.01  | 0.00555              | 0.13009  | 0.00068 |
| TC0800002617.mm.1 | <a href="#">Dnaja2</a>   | DnaJ (Hsp40) homolog, subfamily A, member 2                 | 9.26 ± 0.02        | 9.23 ± 0.06  | 9.11 ± 0.03  | 9.13 ± 0.05  | 0.00833              | 0.96744  | 0.51684 |
| TC1600000322.mm.1 | <a href="#">Dnajb11</a>  | DnaJ (Hsp40) homolog, subfamily B, member 11                | 7.59 ± 0.05        | 7.41 ± 0.06  | 7.45 ± 0.06  | 7.15 ± 0.08  | 0.01111              | 0.00386  | 0.2669  |
| TC1100003776.mm.1 | <a href="#">Dnajc7</a>   | DnaJ (Hsp40) homolog, subfamily C, member 7                 | 7.8 ± 0.06         | 7.74 ± 0.06  | 7.62 ± 0.03  | 7.85 ± 0.03  | 0.31872              | 0.25672  | 0.00549 |
| TC1500001886.mm.1 | <a href="#">Dnal4</a>    | dynein, axonemal, light chain 4                             | 5.82 ± 0.02        | 5.89 ± 0.01  | 5.9 ± 0.01   | 5.85 ± 0.03  | 0.44132              | 0.55551  | 0.00846 |
| TC1400001432.mm.1 | <a href="#">Dnase1l3</a> | deoxyribonuclease 1-like 3                                  | 4.1 ± 0.05         | 4.26 ± 0.07  | 4.09 ± 0.03  | 4.29 ± 0.07  | 0.9772               | 0.0086   | 0.59521 |
| TC1900000583.mm.1 | <a href="#">Dntt</a>     | deoxynucleotidyltransferase, terminal                       | 3.5 ± 0.05         | 4.39 ± 0.45  | 3.67 ± 0.03  | 4.66 ± 0.43  | 0.51116              | 0.00801  | 0.81549 |
| TC0600002554.mm.1 | <a href="#">Dok1</a>     | docking protein 1                                           | 7.2 ± 0.07         | 7.35 ± 0.05  | 7.41 ± 0.05  | 7.04 ± 0.04  | 0.52113              | 0.14149  | 0.00062 |
| TC1300002062.mm.1 | <a href="#">Dok3</a>     | docking protein 3                                           | 5.98 ± 0.02        | 6.17 ± 0.05  | 6.09 ± 0.02  | 6.14 ± 0.03  | 0.48014              | 0.00536  | 0.0993  |
| TC0800002735.mm.1 | <a href="#">Dok4</a>     | docking protein 4                                           | 6.77 ± 0.02        | 6.83 ± 0.02  | 6.87 ± 0.01  | 6.8 ± 0.01   | 0.11503              | 0.62568  | 0.00465 |
| TC0900000504.mm.1 | <a href="#">Dpagt1</a>   | dolichyl-phosphate (UDP-N-acetylglucosamine) acetylglucosa  | 7.26 ± 0.03        | 7.12 ± 0.03  | 7.19 ± 0.05  | 6.99 ± 0.07  | 0.04676              | 0.00233  | 0.4706  |
| TC0800001511.mm.1 | <a href="#">Dpep1</a>    | dipeptidase 1 (renal)                                       | 10.05 ± 0.11       | 8.84 ± 0.07  | 10.15 ± 0.08 | 8.81 ± 0.21  | 0.56865              | 2.9E-07  | 0.44213 |

Supplemental Table I

| Probe Set ID      | Symbol                     | Annotations<br>Description                                          | Summary Statistics |              |              |              | 2 way ANOVA p-values |          |         |
|-------------------|----------------------------|---------------------------------------------------------------------|--------------------|--------------|--------------|--------------|----------------------|----------|---------|
|                   |                            |                                                                     | XY sh              | XY Or        | XX sh        | XX Or        | XY vs XX             | Sh vs Or | Intrxn  |
| TC0100001510.mm.1 | <a href="#">Dpt</a>        | dermatopontin                                                       | 12.25 ± 0.05       | 12.07 ± 0.03 | 12.31 ± 0.02 | 11.95 ± 0.13 | 0.66228              | 0.00244  | 0.24275 |
| TC0600000917.mm.1 | <a href="#">Dqx1</a>       | DEAQ RNA-dependent ATPase                                           | 5.14 ± 0.03        | 5.25 ± 0.02  | 5.17 ± 0.03  | 5.32 ± 0.07  | 0.18708              | 0.00397  | 0.82294 |
| TC1000002642.mm.1 | <a href="#">Dram1</a>      | DNA-damage regulated autophagy modulator 1                          | 8.57 ± 0.08        | 8.27 ± 0.09  | 8.37 ± 0.04  | 8.18 ± 0.08  | 0.0595               | 0.00455  | 0.38094 |
| TC0900000593.mm.1 | <a href="#">Drd2</a>       | dopamine receptor D2                                                | 6.84 ± 0.66        | 5.51 ± 0.22  | 4.98 ± 0.08  | 6.57 ± 0.26  | 0.52072              | 0.57438  | 0.00826 |
| TC0X00001277.mm.1 | <a href="#">Drp2</a>       | dystrophin related protein 2                                        | 5.96 ± 0.15        | 5.65 ± 0.08  | 5.54 ± 0.07  | 6.01 ± 0.11  | 0.8537               | 0.30605  | 0.00971 |
| TC0X00001888.mm.1 | <a href="#">Drr1</a>       | developmentally regulated repeat element-containing transcri        | 10.59 ± 0.09       | 10.59 ± 0.03 | 10.33 ± 0.05 | 10.43 ± 0.04 | 0.00813              | 0.41787  | 0.50158 |
| TC1900001163.mm.1 | <a href="#">Dtx4</a>       | deltex 4 homolog (Drosophila)                                       | 7.65 ± 0.05        | 7.39 ± 0.06  | 7.88 ± 0.06  | 7.49 ± 0.04  | 0.00915              | 4.1E-05  | 0.24594 |
| TC0200001913.mm.1 | <a href="#">Dusp2</a>      | dual specificity phosphatase 2                                      | 5.38 ± 0.04        | 5.71 ± 0.06  | 5.57 ± 0.06  | 5.71 ± 0.02  | 0.09165              | 0.00043  | 0.07718 |
| TC0200001881.mm.1 | <a href="#">Dut</a>        | deoxyuridine triphosphatase                                         | 6.74 ± 0.02        | 6.83 ± 0.01  | 6.82 ± 0.03  | 6.78 ± 0.01  | 0.33302              | 0.11076  | 0.00221 |
| TC1100000936.mm.1 | <a href="#">Dvl2</a>       | dishevelled 2, dsh homolog (Drosophila)                             | 6.62 ± 0.04        | 6.83 ± 0.02  | 6.78 ± 0     | 6.85 ± 0.04  | 0.02835              | 0.00173  | 0.11639 |
| TC1700001264.mm.1 | <a href="#">Dync2li1</a>   | dynein cytoplasmic 2 light intermediate chain 1                     | 6.79 ± 0.03        | 6.73 ± 0.05  | 7.01 ± 0.05  | 6.66 ± 0.09  | 0.14323              | 0.00473  | 0.01347 |
| TC1700001381.mm.1 | <a href="#">Dynlt1a</a>    | dynein light chain Tctex-type 1A                                    | 7.36 ± 0.05        | 7.27 ± 0.04  | 7.53 ± 0.03  | 7.42 ± 0.03  | 0.0009               | 0.04105  | 0.61615 |
| TC1700000060.mm.1 | <a href="#">Dynlt1b</a>    | dynein light chain Tctex-type 1B                                    | 8.14 ± 0.07        | 7.99 ± 0.03  | 8.33 ± 0.04  | 8.23 ± 0.04  | 0.00067              | 0.03182  | 0.65268 |
| TC1700000061.mm.1 | <a href="#">Dynlt1c</a>    | dynein light chain Tctex-type 1C                                    | 6.32 ± 0.03        | 6.19 ± 0.03  | 6.43 ± 0.04  | 6.34 ± 0.04  | 0.00215              | 0.00735  | 0.57462 |
| TC1700001388.mm.1 | <a href="#">Dynlt1f</a>    | dynein light chain Tctex-type 1F                                    | 6.53 ± 0.04        | 6.44 ± 0.03  | 6.7 ± 0.05   | 6.57 ± 0.02  | 0.00133              | 0.01138  | 0.6885  |
| TC0600003319.mm.1 | <a href="#">Dynlt1-ps1</a> | dynein light chain Tctex-type 1, pseudogene 1                       | 8.97 ± 0.05        | 8.84 ± 0.05  | 9.23 ± 0.03  | 9.15 ± 0.06  | 6.9E-05              | 0.0772   | 0.74107 |
| TC0600000948.mm.1 | <a href="#">Dysf</a>       | dysferlin                                                           | 7.48 ± 0.03        | 7.4 ± 0.01   | 7.33 ± 0.01  | 7.5 ± 0.05   | 0.51788              | 0.22727  | 0.00197 |
| TC0900003325.mm.1 | <a href="#">Dyx1c1</a>     | dyslexia susceptibility 1 candidate 1 homolog (human)               | 5.16 ± 0.04        | 5.29 ± 0.03  | 5.37 ± 0.03  | 5.32 ± 0.05  | 0.00538              | 0.24955  | 0.02658 |
| TC1400002719.mm.1 | <a href="#">Dzip1</a>      | DAZ interacting protein 1                                           | 6.35 ± 0.07        | 6.52 ± 0.01  | 6.64 ± 0.06  | 6.48 ± 0.06  | 0.036                | 0.88313  | 0.00861 |
| TC0300002482.mm.1 | <a href="#">Ecm1</a>       | extracellular matrix protein 1                                      | 9.1 ± 0.09         | 9.02 ± 0.07  | 9.26 ± 0.08  | 8.77 ± 0.03  | 0.80753              | 0.00371  | 0.01023 |
| TC1300000565.mm.1 | <a href="#">Ecm2</a>       | extracellular matrix protein 2, female organ and adipocyte spe      | 9.66 ± 0.1         | 9.95 ± 0.09  | 9.95 ± 0.05  | 9.63 ± 0.13  | 0.99234              | 0.99234  | 0.00761 |
| TC1000002205.mm.1 | <a href="#">Edar</a>       | ectodysplasin-A receptor                                            | 5.35 ± 0.03        | 5.54 ± 0.04  | 5.43 ± 0.05  | 5.52 ± 0.05  | 0.60396              | 0.00642  | 0.28903 |
| TC0200004970.mm.1 | <a href="#">Edem2</a>      | ER degradation enhancer, mannosidase alpha-like 2                   | 7.13 ± 0.01        | 7.07 ± 0.02  | 7.13 ± 0.02  | 7.09 ± 0.01  | 0.38076              | 0.0087   | 0.55399 |
| TC1300000998.mm.1 | <a href="#">Edil3</a>      | EGF-like repeats and discoidin I-like domains 3                     | 5.23 ± 0.15        | 4.85 ± 0.06  | 4.8 ± 0.03   | 5.15 ± 0.09  | 0.80028              | 0.89282  | 0.00824 |
| TC1400002641.mm.1 | <a href="#">Ednrb</a>      | endothelin receptor type B                                          | 8.47 ± 0.07        | 7.98 ± 0.17  | 8.1 ± 0.11   | 8.31 ± 0.03  | 0.85624              | 0.2053   | 0.00438 |
| TC1500001750.mm.1 | <a href="#">Eef1d</a>      | eukaryotic translation elongation factor 1 delta (guanine nucle     | 7.33 ± 0.03        | 7.47 ± 0.02  | 7.45 ± 0.03  | 7.42 ± 0.03  | 0.17228              | 0.04072  | 0.00553 |
| TC0400003894.mm.1 | <a href="#">Efh2</a>       | EF hand domain containing 2                                         | 8.67 ± 0.04        | 8.72 ± 0.05  | 8.75 ± 0.04  | 8.54 ± 0.06  | 0.5207               | 0.23656  | 0.00829 |
| TC1100000161.mm.1 | <a href="#">Egfr</a>       | epidermal growth factor receptor                                    | 8.85 ± 0.1         | 8.29 ± 0.09  | 8.76 ± 0.07  | 8.03 ± 0.14  | 0.18458              | 5.2E-05  | 0.31441 |
| TC0700002417.mm.1 | <a href="#">Ehd2</a>       | EH-domain containing 2                                              | 10.48 ± 0.06       | 10.34 ± 0.02 | 10.5 ± 0.03  | 10.11 ± 0.07 | 0.05979              | 0.00018  | 0.04092 |
| TC1600001368.mm.1 | <a href="#">Ehhadh</a>     | enoyl-Coenzyme A, hydratase/3-hydroxyacyl Coenzyme A de             | 8.68 ± 0.18        | 8.15 ± 0.24  | 7.26 ± 0.31  | 8.56 ± 0.21  | 0.04287              | 0.14708  | 0.00157 |
| TC1700000650.mm.1 | <a href="#">Ehmt2</a>      | euchromatic histone lysine N-methyltransferase 2                    | 8.29 ± 0.01        | 8.35 ± 0.01  | 8.34 ± 0.01  | 8.36 ± 0.02  | 0.06403              | 0.00474  | 0.16336 |
| TC0X00002643.mm.1 | <a href="#">Eif2s3x</a>    | eukaryotic translation initiation factor 2, subunit 3, structural g | 9.55 ± 0.02        | 9.62 ± 0.05  | 10.08 ± 0.05 | 10 ± 0.07    | 2.5E-07              | 0.85098  | 0.13539 |

Supplemental Table I

| Probe Set ID      | Symbol                  | Annotations<br>Description                                          | Summary Statistics |              |              |              | 2 way ANOVA p-values |          |         |
|-------------------|-------------------------|---------------------------------------------------------------------|--------------------|--------------|--------------|--------------|----------------------|----------|---------|
|                   |                         |                                                                     | XY sh              | XY Or        | XX sh        | XX Or        | XY vs XX             | Sh vs Or | Intrxn  |
| TC0Y00000006.mm.1 | <a href="#">Eif2s3y</a> | eukaryotic translation initiation factor 2, subunit 3, structural g | 6.64 ± 0.12        | 6.71 ± 0.1   | 4.51 ± 0.03  | 4.56 ± 0.03  | 2.4E-12              | 0.85942  | 0.66076 |
| TC0500001692.mm.1 | <a href="#">Eif3b</a>   | eukaryotic translation initiation factor 3, subunit B               | 9.32 ± 0.02        | 9.2 ± 0.05   | 9.17 ± 0.01  | 9.09 ± 0.04  | 0.00152              | 0.00586  | 0.52517 |
| TC1500001504.mm.1 | <a href="#">Eif3h</a>   | eukaryotic translation initiation factor 3, subunit H               | 10.71 ± 0.05       | 10.89 ± 0.03 | 10.87 ± 0.02 | 10.75 ± 0.08 | 0.73247              | 0.42607  | 0.00792 |
| TC1100003056.mm.1 | <a href="#">Eif4a1</a>  | eukaryotic translation initiation factor 4A1                        | 8.89 ± 0.02        | 8.83 ± 0.04  | 8.72 ± 0.02  | 8.77 ± 0.03  | 0.00051              | 0.66451  | 0.03689 |
| TC1600000288.mm.1 | <a href="#">Eif4g1</a>  | eukaryotic translation initiation factor 4, gamma 1                 | 9.43 ± 0.02        | 9.3 ± 0.02   | 9.24 ± 0.04  | 9.32 ± 0.03  | 0.00585              | 0.24888  | 0.00176 |
| TC0400001715.mm.1 | <a href="#">Eif4g3</a>  | eukaryotic translation initiation factor 4 gamma, 3                 | 8.12 ± 0.02        | 7.97 ± 0.03  | 8.08 ± 0.03  | 7.9 ± 0.05   | 0.19635              | 0.00041  | 0.50431 |
| TC0200004973.mm.1 | <a href="#">Eif6</a>    | eukaryotic translation initiation factor 6                          | 8.12 ± 0.03        | 8.19 ± 0.01  | 8.22 ± 0.01  | 8.27 ± 0.03  | 0.00563              | 0.04864  | 0.77167 |
| TC0400003043.mm.1 | <a href="#">Elavl2</a>  | ELAV (embryonic lethal, abnormal vision, Drosophila)-like 2 (       | 5.66 ± 0.21        | 5.33 ± 0.14  | 5.08 ± 0.04  | 5.77 ± 0.09  | 0.82268              | 0.16234  | 0.00771 |
| TC0500003379.mm.1 | <a href="#">Eln</a>     | elastin                                                             | 11.13 ± 0.14       | 11.1 ± 0.06  | 11.32 ± 0.1  | 10.43 ± 0.15 | 0.10226              | 0.00325  | 0.00268 |
| TC0900001899.mm.1 | <a href="#">Elof1</a>   | elongation factor 1 homolog (ELF1, <i>S. cerevisiae</i> )           | 7.6 ± 0.03         | 7.75 ± 0.05  | 7.68 ± 0.04  | 7.84 ± 0.06  | 0.12965              | 0.00683  | 0.70817 |
| TC0300001521.mm.1 | <a href="#">Eltf1</a>   | EGF, latrophilin seven transmembrane domain containing 1            | 8.62 ± 0.13        | 8.27 ± 0.15  | 8.1 ± 0.17   | 8.62 ± 0.03  | 0.37274              | 0.72995  | 0.00402 |
| TC0800003249.mm.1 | <a href="#">Emc8</a>    | ER membrane protein complex subunit 8                               | 8.11 ± 0.07        | 8.3 ± 0.01   | 8.29 ± 0.05  | 8.15 ± 0.06  | 0.77485              | 0.66175  | 0.00968 |
| TC050000305.mm.1  | <a href="#">Emilin1</a> | elastin microfibril interfacier 1                                   | 7.6 ± 0.08         | 7.82 ± 0.03  | 7.89 ± 0.08  | 7.63 ± 0.04  | 0.39322              | 0.76721  | 0.00268 |
| TC1200001109.mm.1 | <a href="#">Eml1</a>    | echinoderm microtubule associated protein like 1                    | 8.75 ± 0.09        | 8.82 ± 0.03  | 8.9 ± 0.07   | 8.59 ± 0.06  | 0.76799              | 0.20128  | 0.00894 |
| TC0700000290.mm.1 | <a href="#">Eml2</a>    | echinoderm microtubule associated protein like 2                    | 7.53 ± 0.03        | 7.62 ± 0.03  | 7.67 ± 0.05  | 7.57 ± 0.01  | 0.10354              | 0.79314  | 0.00644 |
| TC0600001606.mm.1 | <a href="#">Emp1</a>    | epithelial membrane protein 1                                       | 9.66 ± 0.07        | 9.51 ± 0.06  | 9.66 ± 0.07  | 9.31 ± 0.09  | 0.22809              | 0.0043   | 0.14589 |
| TC1600001191.mm.1 | <a href="#">Emp2</a>    | epithelial membrane protein 2                                       | 10.18 ± 0.1        | 10.29 ± 0.05 | 10.47 ± 0.07 | 10.13 ± 0.06 | 0.26053              | 0.26373  | 0.00837 |
| TC1700001034.mm.1 | <a href="#">Emr1</a>    | EGF-like module containing, mucin-like, hormone receptor-lik        | 7.65 ± 0.06        | 7.3 ± 0.1    | 7.6 ± 0.05   | 7.13 ± 0.12  | 0.26453              | 0.00049  | 0.46209 |
| TC0900001768.mm.1 | <a href="#">Endod1</a>  | endonuclease domain containing 1                                    | 8.22 ± 0.08        | 8.45 ± 0.01  | 8.39 ± 0.05  | 8.2 ± 0.04   | 0.61401              | 0.58415  | 0.0018  |
| TC1500002155.mm.1 | <a href="#">Endou</a>   | endonuclease, polyU-specific                                        | 5.08 ± 0.04        | 5.48 ± 0.1   | 5.19 ± 0.08  | 5.47 ± 0.08  | 0.5962               | 0.00055  | 0.49214 |
| TC1100002004.mm.1 | <a href="#">Endov</a>   | endonuclease V                                                      | 6.58 ± 0.03        | 6.74 ± 0.02  | 6.72 ± 0.02  | 6.71 ± 0.03  | 0.03956              | 0.01239  | 0.00441 |
| TC0300002926.mm.1 | <a href="#">Enpep</a>   | glutamyl aminopeptidase                                             | 8.01 ± 0.05        | 7.94 ± 0.07  | 8.18 ± 0.06  | 7.84 ± 0.1   | 0.78884              | 0.00758  | 0.12414 |
| TC0200005462.mm.1 | <a href="#">Entpd2</a>  | ectonucleoside triphosphate diphosphohydrolase 2                    | 8.51 ± 0.05        | 8.34 ± 0.03  | 8.68 ± 0.05  | 8.31 ± 0.06  | 0.08714              | 0.00011  | 0.01934 |
| TC0900001561.mm.1 | <a href="#">Eomes</a>   | eomesodermin homolog ( <i>Xenopus laevis</i> )                      | 4.61 ± 0.03        | 4.79 ± 0.06  | 4.72 ± 0     | 4.78 ± 0.04  | 0.21811              | 0.00827  | 0.18402 |
| TC0600002169.mm.1 | <a href="#">Epha1</a>   | Eph receptor A1                                                     | 5.74 ± 0.03        | 5.92 ± 0.02  | 5.94 ± 0.02  | 5.87 ± 0.05  | 0.07153              | 0.14585  | 0.0028  |
| TC1400002266.mm.1 | <a href="#">Ephx2</a>   | epoxide hydrolase 2, cytoplasmic                                    | 9.43 ± 0.2         | 9.12 ± 0.25  | 8.7 ± 0.27   | 9.87 ± 0.1   | 0.74071              | 0.13357  | 0.00232 |
| TC0100001787.mm.1 | <a href="#">Eprs</a>    | glutamyl-prolyl-tRNA synthetase                                     | 9.07 ± 0.02        | 8.88 ± 0.03  | 8.85 ± 0.04  | 8.74 ± 0.08  | 0.00242              | 0.00863  | 0.38767 |
| TC0400001164.mm.1 | <a href="#">Eps15</a>   | epidermal growth factor receptor pathway substrate 15               | 8.6 ± 0.04         | 8.41 ± 0.05  | 8.57 ± 0.04  | 8.33 ± 0.11  | 0.53102              | 0.00793  | 0.64806 |
| TC0600003342.mm.1 | <a href="#">Eps8</a>    | epidermal growth factor receptor pathway substrate 8                | 7.4 ± 0.05         | 7.14 ± 0.04  | 7.24 ± 0.03  | 7.1 ± 0.04   | 0.06954              | 0.00107  | 0.35827 |
| TC0700000300.mm.1 | <a href="#">Ercc2</a>   | excision repair cross-complementing rodent repair deficiency        | 7.14 ± 0.01        | 7.17 ± 0     | 7.21 ± 0.02  | 7.18 ± 0.01  | 0.00631              | 0.86129  | 0.01899 |
| TC1900001346.mm.1 | <a href="#">Emp1</a>    | endoplasmic reticulum metallopeptidase 1                            | 8.89 ± 0.08        | 8.68 ± 0.08  | 8.92 ± 0.05  | 8.67 ± 0.08  | 0.81639              | 0.00369  | 0.82415 |
| TC0500002272.mm.1 | <a href="#">Evc</a>     | Ellis van Creveld gene syndrome                                     | 7.4 ± 0.07         | 7.55 ± 0.03  | 7.71 ± 0.08  | 7.45 ± 0.04  | 0.0734               | 0.47387  | 0.00381 |

Supplemental Table I

| Probe Set ID      | Symbol                  | Annotations<br>Description                                | Summary Statistics |              |              |              | 2 way ANOVA p-values |          |         |
|-------------------|-------------------------|-----------------------------------------------------------|--------------------|--------------|--------------|--------------|----------------------|----------|---------|
|                   |                         |                                                           | XY sh              | XY Or        | XX sh        | XX Or        | XY vs XX             | Sh vs Or | Intrxn  |
| TC050000423.mm.1  | <a href="#">Evc2</a>    | Ellis van Creveld syndrome 2                              | 7.34 ± 0.06        | 7.53 ± 0.02  | 7.55 ± 0.05  | 7.45 ± 0     | 0.11973              | 0.23905  | 0.00386 |
| TC1100003326.mm.1 | <a href="#">Evi2b</a>   | ecotropic viral integration site 2b                       | 6.16 ± 0.07        | 5.92 ± 0.09  | 6.15 ± 0.05  | 5.88 ± 0.13  | 0.76362              | 0.00912  | 0.91493 |
| TC1200001236.mm.1 | <a href="#">Exoc3l4</a> | exocyst complex component 3-like 4                        | 5.84 ± 0.02        | 5.98 ± 0.01  | 6.05 ± 0.05  | 6.04 ± 0.06  | 0.00354              | 0.10555  | 0.05064 |
| TC1300001814.mm.1 | <a href="#">F13a1</a>   | coagulation factor XIII, A1 subunit                       | 9.13 ± 0.1         | 8.56 ± 0.04  | 9 ± 0.07     | 8.46 ± 0.03  | 0.28602              | 7.2E-06  | 0.85233 |
| TC1300002462.mm.1 | <a href="#">F2r</a>     | coagulation factor II (thrombin) receptor                 | 8.9 ± 0.07         | 8.94 ± 0.06  | 9.08 ± 0.09  | 8.62 ± 0.12  | 0.57547              | 0.03819  | 0.00753 |
| TC0300001639.mm.1 | <a href="#">Fabp4</a>   | fatty acid binding protein 4, adipocyte                   | 11.92 ± 0.12       | 11.63 ± 0.15 | 11.41 ± 0.2  | 11.96 ± 0.02 | 0.32838              | 0.58602  | 0.00458 |
| TC1000000508.mm.1 | <a href="#">Fabp7</a>   | fatty acid binding protein 7, brain                       | 7.95 ± 0.69        | 6.62 ± 0.48  | 5.88 ± 0.46  | 8.09 ± 0.33  | 0.71676              | 0.33806  | 0.00873 |
| TC0700003657.mm.1 | <a href="#">Fah</a>     | fumarylacetoacetate hydrolase                             | 8 ± 0.13           | 7.71 ± 0.13  | 7.53 ± 0.11  | 7.89 ± 0.03  | 0.12871              | 0.91316  | 0.00616 |
| TC1400001439.mm.1 | <a href="#">Fam107a</a> | family with sequence similarity 107, member A             | 7.63 ± 0.2         | 7.08 ± 0.08  | 6.96 ± 0.04  | 6.64 ± 0.04  | 0.00362              | 0.01914  | 0.82703 |
| TC1100001459.mm.1 | <a href="#">Fam117a</a> | family with sequence similarity 117, member A             | 6.5 ± 0.03         | 6.65 ± 0.02  | 6.56 ± 0.01  | 6.71 ± 0.06  | 0.20076              | 0.00201  | 0.74025 |
| TC1300001947.mm.1 | <a href="#">Fam120a</a> | family with sequence similarity 120, member A             | 9.72 ± 0.03        | 9.63 ± 0.02  | 9.68 ± 0.02  | 9.59 ± 0.03  | 0.15756              | 0.00493  | 0.77326 |
| TC0600002381.mm.1 | <a href="#">Fam13a</a>  | family with sequence similarity 13, member A              | 8.12 ± 0.2         | 7.77 ± 0.16  | 7.02 ± 0.21  | 7.99 ± 0.1   | 0.0228               | 0.13741  | 0.00216 |
| TC0700001015.mm.1 | <a href="#">Fam169b</a> | family with sequence similarity 169, member B             | 4.44 ± 0.03        | 4.7 ± 0.05   | 4.6 ± 0.03   | 4.66 ± 0.04  | 0.15961              | 0.00132  | 0.02525 |
| TC1700001673.mm.1 | <a href="#">Fam173a</a> | family with sequence similarity 173, member A             | 6.87 ± 0.04        | 6.86 ± 0.03  | 6.83 ± 0.04  | 7.03 ± 0.01  | 0.17339              | 0.03625  | 0.00347 |
| TC0900001633.mm.1 | <a href="#">Fam198a</a> | family with sequence similarity 198, member A             | 6.46 ± 0.06        | 6.71 ± 0.03  | 6.71 ± 0.06  | 6.56 ± 0.08  | 0.36966              | 0.38916  | 0.00397 |
| TC1100003993.mm.1 | <a href="#">Fam20a</a>  | family with sequence similarity 20, member A              | 6.43 ± 0.05        | 6.4 ± 0.03   | 6.65 ± 0.08  | 6.23 ± 0.07  | 0.70072              | 0.00246  | 0.00547 |
| TC1100002945.mm.1 | <a href="#">Fam211a</a> | family with sequence similarity 211, member A             | 7.24 ± 0.06        | 7.46 ± 0.04  | 7.39 ± 0.05  | 7.31 ± 0.02  | 0.69036              | 0.09032  | 0.00466 |
| TC0500003208.mm.1 | <a href="#">Fam216a</a> | family with sequence similarity 216, member A             | 7.09 ± 0.01        | 7.05 ± 0.02  | 7.09 ± 0.02  | 7 ± 0.03     | 0.2899               | 0.00447  | 0.19775 |
| TC1300000395.mm.1 | <a href="#">Fam50b</a>  | family with sequence similarity 50, member B              | 4.63 ± 0.03        | 4.92 ± 0.08  | 4.65 ± 0.02  | 4.71 ± 0.05  | 0.05097              | 0.00519  | 0.05013 |
| TC0200005496.mm.1 | <a href="#">Fam78a</a>  | family with sequence similarity 78, member A              | 5.65 ± 0.02        | 5.88 ± 0.02  | 5.75 ± 0.03  | 5.91 ± 0.1   | 0.24903              | 0.00213  | 0.55773 |
| TC1200001446.mm.1 | <a href="#">Fam84a</a>  | family with sequence similarity 84, member A              | 6.38 ± 0.12        | 6.8 ± 0.09   | 6.7 ± 0.03   | 6.31 ± 0.1   | 0.33663              | 0.92124  | 0.00112 |
| TC1400001315.mm.1 | <a href="#">Farp1</a>   | FERM, RhoGEF (Arhgef) and pleckstrin domain protein 1 (ch | 7.8 ± 0.02         | 7.62 ± 0.03  | 7.79 ± 0.01  | 7.74 ± 0.06  | 0.13233              | 0.00618  | 0.12108 |
| TC1200002242.mm.1 | <a href="#">Fbln5</a>   | fibulin 5                                                 | 10.78 ± 0.11       | 11.05 ± 0.05 | 11.04 ± 0.07 | 10.68 ± 0.12 | 0.73083              | 0.8628   | 0.00366 |
| TC0200001939.mm.1 | <a href="#">Fbln7</a>   | fibulin 7                                                 | 8.41 ± 0.11        | 8.74 ± 0.03  | 8.92 ± 0.11  | 8.54 ± 0.1   | 0.13224              | 0.79992  | 0.00248 |
| TC0200004525.mm.1 | <a href="#">Fbn1</a>    | fibrillin 1                                               | 9.78 ± 0.09        | 9.54 ± 0.05  | 9.78 ± 0.09  | 9.11 ± 0.05  | 0.01522              | 4.6E-05  | 0.00906 |
| TC1300000688.mm.1 | <a href="#">Fbxl21</a>  | F-box and leucine-rich repeat protein 21                  | 4.51 ± 0.02        | 4.55 ± 0.02  | 4.67 ± 0.05  | 4.6 ± 0.03   | 0.00564              | 0.79796  | 0.08056 |
| TC1500001285.mm.1 | <a href="#">Fbxl7</a>   | F-box and leucine-rich repeat protein 7                   | 6.3 ± 0.05         | 6.5 ± 0.05   | 6.43 ± 0.01  | 6.35 ± 0.03  | 0.90876              | 0.19663  | 0.00617 |
| TC0400002570.mm.1 | <a href="#">Fbxo10</a>  | F-box protein 10                                          | 6.96 ± 0.04        | 7.03 ± 0.02  | 7.05 ± 0.03  | 6.96 ± 0.03  | 0.41206              | 0.94335  | 0.00567 |
| TC0500001302.mm.1 | <a href="#">Fbxo21</a>  | F-box protein 21                                          | 8.6 ± 0.07         | 8.41 ± 0.08  | 8.32 ± 0.07  | 8.57 ± 0.03  | 0.23726              | 0.89033  | 0.00314 |
| TC1000001686.mm.1 | <a href="#">Fbxo5</a>   | F-box protein 5                                           | 5.89 ± 0.02        | 6.02 ± 0.03  | 5.92 ± 0.05  | 5.99 ± 0.03  | 0.82968              | 0.00614  | 0.26394 |
| TC0500003136.mm.1 | <a href="#">Fbxw8</a>   | F-box and WD-40 domain protein 8                          | 8.25 ± 0.01        | 8.2 ± 0.01   | 8.23 ± 0.02  | 8.16 ± 0.02  | 0.04869              | 0.00079  | 0.58588 |
| TC0100003533.mm.1 | <a href="#">Fcer1g</a>  | Fc receptor, IgE, high affinity I, gamma polypeptide      | 7.7 ± 0.06         | 7.55 ± 0.07  | 7.71 ± 0.06  | 7.39 ± 0.08  | 0.32395              | 0.00515  | 0.18284 |



Supplemental Table I

| Probe Set ID      | Symbol                  | Annotations<br>Description                       | Summary Statistics |             |              |              | 2 way ANOVA p-values |          |         |
|-------------------|-------------------------|--------------------------------------------------|--------------------|-------------|--------------|--------------|----------------------|----------|---------|
|                   |                         |                                                  | XY sh              | XY Or       | XX sh        | XX Or        | XY vs XX             | Sh vs Or | Intrxn  |
| TC0300002506.mm.1 | <a href="#">Fcgr1</a>   | Fc receptor, IgG, high affinity I                | 6.41 ± 0.09        | 6.02 ± 0.05 | 6.1 ± 0.03   | 6 ± 0.06     | 0.05125              | 0.00532  | 0.08926 |
| TC0100003522.mm.1 | <a href="#">Fcgr2b</a>  | Fc receptor, IgG, low affinity IIb               | 7.29 ± 0.07        | 6.84 ± 0.13 | 6.93 ± 0.04  | 6.67 ± 0.04  | 0.00792              | 0.00092  | 0.41773 |
| TC0100003524.mm.1 | <a href="#">Fcgr3</a>   | Fc receptor, IgG, low affinity III               | 7.93 ± 0.04        | 7.6 ± 0.07  | 7.57 ± 0.03  | 7.37 ± 0.05  | 7.7E-05              | 0.00023  | 0.37386 |
| TC0800002441.mm.1 | <a href="#">Fcho1</a>   | FCH domain only 1                                | 6.01 ± 0.05        | 6.12 ± 0.02 | 6.02 ± 0.04  | 6.23 ± 0.06  | 0.24808              | 0.00541  | 0.3599  |
| TC0200003165.mm.1 | <a href="#">Fcna</a>    | ficolin A                                        | 7.33 ± 0.03        | 6.99 ± 0.06 | 7.19 ± 0.05  | 7.04 ± 0.09  | 0.58926              | 0.00153  | 0.15453 |
| TC0300002284.mm.1 | <a href="#">Fcrls</a>   | Fc receptor-like S, scavenger receptor           | 7.47 ± 0.08        | 7.31 ± 0.05 | 7.66 ± 0.05  | 7.18 ± 0.12  | 0.60347              | 0.00205  | 0.05801 |
| TC0100002593.mm.1 | <a href="#">Fev</a>     | FEV (ETS oncogene family)                        | 6.16 ± 0.04        | 6.34 ± 0.02 | 6.31 ± 0.05  | 6.44 ± 0.07  | 0.02248              | 0.00916  | 0.63402 |
| TC1900000545.mm.1 | <a href="#">Ffar4</a>   | free fatty acid receptor 4                       | 7.25 ± 0.2         | 7.57 ± 0.2  | 6.84 ± 0.2   | 8.14 ± 0.26  | 0.94653              | 0.00583  | 0.01837 |
| TC0X00001508.mm.1 | <a href="#">Fgd1</a>    | FYVE, RhoGEF and PH domain containing 1          | 6.69 ± 0.07        | 6.83 ± 0.02 | 6.93 ± 0.03  | 6.74 ± 0.05  | 0.18212              | 0.68142  | 0.00533 |
| TC1100003064.mm.1 | <a href="#">Fgf11</a>   | fibroblast growth factor 11                      | 7.43 ± 0.06        | 7.55 ± 0.03 | 7.77 ± 0.06  | 7.55 ± 0.03  | 0.00823              | 0.27126  | 0.01081 |
| TC0X00002292.mm.1 | <a href="#">Fgf13</a>   | fibroblast growth factor 13                      | 5.96 ± 0.04        | 6.11 ± 0.02 | 6.19 ± 0.04  | 6.07 ± 0     | 0.0058               | 0.45742  | 0.00052 |
| TC0X00001062.mm.1 | <a href="#">Fgf16</a>   | fibroblast growth factor 16                      | 5.48 ± 0.04        | 5.73 ± 0.03 | 5.73 ± 0.04  | 5.82 ± 0.09  | 0.00657              | 0.00899  | 0.16932 |
| TC1400000829.mm.1 | <a href="#">Fgf9</a>    | fibroblast growth factor 9                       | 5.75 ± 0.02        | 5.84 ± 0.02 | 5.77 ± 0.02  | 5.91 ± 0.05  | 0.16644              | 0.0024   | 0.32044 |
| TC0100002261.mm.1 | <a href="#">Fhl2</a>    | four and a half LIM domains 2                    | 7.1 ± 0.06         | 7.11 ± 0.02 | 7.25 ± 0.06  | 7.01 ± 0.04  | 0.32345              | 0.08928  | 0.00816 |
| TC0400002315.mm.1 | <a href="#">Fhl5</a>    | four and a half LIM domains 5                    | 7.9 ± 0.14         | 7.35 ± 0.09 | 7.93 ± 0.1   | 7.09 ± 0.23  | 0.568                | 0.00075  | 0.27507 |
| TC0X00001667.mm.1 | <a href="#">Figf</a>    | c-fos induced growth factor                      | 8.87 ± 0.08        | 8.82 ± 0.02 | 9.15 ± 0.12  | 8.55 ± 0.15  | 0.8779               | 0.008    | 0.01328 |
| TC0200003643.mm.1 | <a href="#">Fign</a>    | fidgetin                                         | 5.39 ± 0.09        | 4.99 ± 0.07 | 5.26 ± 0.04  | 5.09 ± 0.08  | 0.89338              | 0.00396  | 0.27167 |
| TC1500002254.mm.1 | <a href="#">Fignl2</a>  | fidgetin-like 2                                  | 5.89 ± 0.08        | 6.06 ± 0.06 | 6.27 ± 0.06  | 6.21 ± 0.09  | 0.00979              | 0.76732  | 0.33609 |
| TC0200005091.mm.1 | <a href="#">Fitm2</a>   | fat storage-inducing transmembrane protein 2     | 8.27 ± 0.14        | 7.96 ± 0.14 | 7.69 ± 0.17  | 8.18 ± 0.05  | 0.09899              | 0.79812  | 0.00475 |
| TC0200002263.mm.1 | <a href="#">Fkbp1a</a>  | FK506 binding protein 1a                         | 9.18 ± 0.03        | 9.09 ± 0.02 | 9.13 ± 0.02  | 9.02 ± 0.03  | 0.08472              | 0.00679  | 0.62834 |
| TC1900001026.mm.1 | <a href="#">Fkbp2</a>   | FK506 binding protein 2                          | 10.14 ± 0.05       | 10.1 ± 0.03 | 10.28 ± 0.03 | 10.22 ± 0.05 | 0.00655              | 0.26323  | 0.83997 |
| TC1200000951.mm.1 | <a href="#">Flrt2</a>   | fibronectin leucine rich transmembrane protein 2 | 7.72 ± 0.1         | 7.42 ± 0.07 | 7.68 ± 0.11  | 7.21 ± 0.08  | 0.32959              | 0.0027   | 0.21637 |
| TC0500003629.mm.1 | <a href="#">Flt1</a>    | FMS-like tyrosine kinase 1                       | 8.19 ± 0.08        | 7.99 ± 0.1  | 7.88 ± 0.09  | 8.15 ± 0.03  | 0.19777              | 0.99126  | 0.00523 |
| TC1700001605.mm.1 | <a href="#">Flywch2</a> | FLYWCH family member 2                           | 5.55 ± 0.04        | 5.68 ± 0.01 | 5.65 ± 0.02  | 5.79 ± 0.07  | 0.02942              | 0.00656  | 0.9702  |
| TC0100003401.mm.1 | <a href="#">Fmo1</a>    | flavin containing monooxygenase 1                | 9.89 ± 0.09        | 9.49 ± 0.05 | 9.96 ± 0.07  | 9.56 ± 0.08  | 0.5579               | 0.0001   | 0.7697  |
| TC0100003406.mm.1 | <a href="#">Fmo3</a>    | flavin containing monooxygenase 3                | 8.75 ± 0.4         | 7.96 ± 0.12 | 7.95 ± 0.16  | 6.79 ± 0.11  | 0.00645              | 0.00698  | 0.27694 |
| TC0500002183.mm.1 | <a href="#">Fndc4</a>   | fibronectin type III domain containing 4         | 6.82 ± 0.04        | 6.87 ± 0.02 | 6.93 ± 0.02  | 6.78 ± 0.03  | 0.34885              | 0.26068  | 0.00133 |
| TC0400001514.mm.1 | <a href="#">Fndc5</a>   | fibronectin type III domain containing 5         | 6.4 ± 0.07         | 6.58 ± 0.03 | 6.42 ± 0.05  | 6.66 ± 0.08  | 0.45496              | 0.00568  | 0.62967 |
| TC0700003845.mm.1 | <a href="#">Folr2</a>   | folate receptor 2 (fetal)                        | 9.16 ± 0.05        | 8.61 ± 0.11 | 9.21 ± 0.09  | 8.64 ± 0.08  | 0.59861              | 1.3E-05  | 0.8605  |
| TC1300001115.mm.1 | <a href="#">Foxd1</a>   | forkhead box D1                                  | 6.21 ± 0.04        | 6.32 ± 0.05 | 6.47 ± 0.09  | 6.44 ± 0.02  | 0.00544              | 0.39343  | 0.22012 |
| TC0600001393.mm.1 | <a href="#">Foxj2</a>   | forkhead box J2                                  | 8.26 ± 0.08        | 8.32 ± 0.06 | 8.55 ± 0.07  | 8.21 ± 0.06  | 0.20519              | 0.06822  | 0.00854 |
| TC0900001242.mm.1 | <a href="#">Foxl2</a>   | forkhead box L2                                  | 5.74 ± 0.06        | 6.04 ± 0.09 | 6 ± 0.05     | 6.09 ± 0.06  | 0.03234              | 0.00889  | 0.10881 |

Supplemental Table I

| Probe Set ID      | Symbol                  | Annotations<br>Description                                    | Summary Statistics |              |              |              | 2 way ANOVA p-values |          |         |
|-------------------|-------------------------|---------------------------------------------------------------|--------------------|--------------|--------------|--------------|----------------------|----------|---------|
|                   |                         |                                                               | XY sh              | XY Or        | XX sh        | XX Or        | XY vs XX             | Sh vs Or | Intrxn  |
| TC030000376.mm.1  | <a href="#">Foxo1</a>   | forkhead box O1                                               | 8.5 ± 0.05         | 8.61 ± 0.05  | 8.58 ± 0.03  | 8.4 ± 0.06   | 0.1701               | 0.47963  | 0.00898 |
| TC0200004919.mm.1 | <a href="#">Foxs1</a>   | forkhead box S1                                               | 6.91 ± 0.12        | 6.81 ± 0.05  | 7.62 ± 0.11  | 6.7 ± 0.06   | 0.00871              | 0.00013  | 0.00094 |
| TC0600002802.mm.1 | <a href="#">Frm4b</a>   | FERM domain containing 4B                                     | 7.27 ± 0.07        | 7.05 ± 0     | 7 ± 0.02     | 6.98 ± 0.04  | 0.0072               | 0.04425  | 0.12602 |
| TC1200000596.mm.1 | <a href="#">Frm6</a>    | FERM domain containing 6                                      | 8.45 ± 0.04        | 8.42 ± 0.07  | 8.65 ± 0.07  | 8.24 ± 0.09  | 0.8106               | 0.00667  | 0.00928 |
| TC0300001198.mm.1 | <a href="#">Frrs1</a>   | ferric-chelate reductase 1                                    | 7.07 ± 0.04        | 6.87 ± 0.05  | 6.99 ± 0.03  | 6.85 ± 0.03  | 0.37385              | 0.00112  | 0.651   |
| TC1600000536.mm.1 | <a href="#">Fstl1</a>   | follistatin-like 1                                            | 10.91 ± 0.12       | 11.01 ± 0.04 | 11.05 ± 0.07 | 10.64 ± 0.08 | 0.38171              | 0.20293  | 0.00833 |
| TC0300001528.mm.1 | <a href="#">Fubp1</a>   | far upstream element (FUSE) binding protein 1                 | 7.3 ± 0.04         | 7.16 ± 0.05  | 7.06 ± 0.03  | 7.06 ± 0.08  | 0.00631              | 0.18357  | 0.20074 |
| TC0400001668.mm.1 | <a href="#">Fuca1</a>   | fucosidase, alpha-L- 1, tissue                                | 9.35 ± 0.02        | 9.26 ± 0.02  | 9.44 ± 0.04  | 9.32 ± 0.03  | 0.02838              | 0.00247  | 0.54556 |
| TC1100001694.mm.1 | <a href="#">Fzd2</a>    | frizzled homolog 2 (Drosophila)                               | 8.68 ± 0.07        | 8.97 ± 0.07  | 9.03 ± 0.06  | 8.91 ± 0.05  | 0.03125              | 0.16796  | 0.00663 |
| TC0100002470.mm.1 | <a href="#">Fzd5</a>    | frizzled homolog 5 (Drosophila)                               | 7.62 ± 0.04        | 7.81 ± 0.07  | 7.96 ± 0.07  | 7.68 ± 0.03  | 0.04206              | 0.48878  | 0.00044 |
| TC1800000060.mm.1 | <a href="#">Fzd8</a>    | frizzled homolog 8 (Drosophila)                               | 7.26 ± 0.07        | 7.45 ± 0.08  | 7.84 ± 0.13  | 7.16 ± 0.17  | 0.23433              | 0.05117  | 0.00222 |
| TC0700001345.mm.1 | <a href="#">Gab2</a>    | growth factor receptor bound protein 2-associated protein 2   | 8.89 ± 0.07        | 8.78 ± 0.02  | 9.05 ± 0.09  | 8.62 ± 0.13  | 0.9258               | 0.00911  | 0.0598  |
| TC0100000948.mm.1 | <a href="#">Gal3st2</a> | galactose-3-O-sulfotransferase 2                              | 4.79 ± 0.05        | 4.97 ± 0.04  | 4.89 ± 0.08  | 5.04 ± 0.01  | 0.09697              | 0.00503  | 0.68238 |
| TC0500000229.mm.1 | <a href="#">Galnt11</a> | UDP-N-acetyl-alpha-D-galactosamine:polypeptide N-acetylgl     | 7.44 ± 0.04        | 7.43 ± 0.03  | 7.33 ± 0.03  | 7.16 ± 0.09  | 0.00483              | 0.15213  | 0.09831 |
| TC1200000740.mm.1 | <a href="#">Galnt16</a> | UDP-N-acetyl-alpha-D-galactosamine:polypeptide N-acetylgl     | 8.46 ± 0.12        | 8.78 ± 0.05  | 8.62 ± 0.11  | 8.42 ± 0.05  | 0.4958               | 0.36029  | 0.0082  |
| TC0800002256.mm.1 | <a href="#">Galnt7</a>  | UDP-N-acetyl-alpha-D-galactosamine: polypeptide N-acetylgl    | 6.18 ± 0.04        | 6.12 ± 0.02  | 6.06 ± 0.02  | 6.03 ± 0.04  | 0.00833              | 0.26973  | 0.92573 |
| TC0600000661.mm.1 | <a href="#">Gars</a>    | glycyl-tRNA synthetase                                        | 9.16 ± 0.1         | 8.92 ± 0.09  | 8.86 ± 0.07  | 9.09 ± 0.05  | 0.2496               | 0.67325  | 0.00789 |
| TC1100000859.mm.1 | <a href="#">Gas7</a>    | growth arrest specific 7                                      | 7.5 ± 0.07         | 7.21 ± 0.05  | 7.41 ± 0.04  | 7.25 ± 0.06  | 0.95686              | 0.0076   | 0.57007 |
| TC1800000091.mm.1 | <a href="#">Gata6</a>   | GATA binding protein 6                                        | 9.36 ± 0.13        | 9.63 ± 0.06  | 9.81 ± 0.06  | 9.41 ± 0.13  | 0.22002              | 0.6245   | 0.00533 |
| TC0200004511.mm.1 | <a href="#">Gatm</a>    | glycine amidinotransferase (L-arginine:glycine amidinotransfe | 7.65 ± 0.31        | 6.76 ± 0.14  | 6.6 ± 0.15   | 7.39 ± 0.2   | 0.54905              | 0.94559  | 0.00497 |
| TC0300000750.mm.1 | <a href="#">Gba</a>     | glucosidase, beta, acid                                       | 8.29 ± 0.05        | 8.03 ± 0.02  | 8.14 ± 0.04  | 7.92 ± 0.09  | 0.05905              | 0.0011   | 0.992   |
| TC1500000663.mm.1 | <a href="#">Gcat</a>    | glycine C-acetyltransferase (2-amino-3-ketobutyrate-coenzym   | 6.14 ± 0.02        | 6.27 ± 0     | 6.29 ± 0.01  | 6.31 ± 0.03  | 0.00161              | 0.01133  | 0.08886 |
| TC1900001253.mm.1 | <a href="#">Gda</a>     | guanine deaminase                                             | 7.78 ± 0.09        | 7.13 ± 0.12  | 7.34 ± 0.05  | 6.97 ± 0.08  | 0.01002              | 0.00016  | 0.24457 |
| TC0300000994.mm.1 | <a href="#">Gdap2</a>   | ganglioside-induced differentiation-associated-protein 2      | 7.99 ± 0.04        | 7.88 ± 0.03  | 7.82 ± 0.04  | 7.66 ± 0.09  | 0.00348              | 0.03132  | 0.52549 |
| TC0700001385.mm.1 | <a href="#">Gdpd5</a>   | glycerophosphodiester phosphodiesterase domain containing     | 6.8 ± 0.03         | 6.82 ± 0.02  | 6.9 ± 0.02   | 6.86 ± 0.01  | 0.00557              | 0.73374  | 0.14896 |
| TC0400000092.mm.1 | <a href="#">Gem</a>     | GTP binding protein (gene overexpressed in skeletal muscle)   | 7.51 ± 0.16        | 7.91 ± 0.06  | 8 ± 0.12     | 7.53 ± 0.08  | 0.70712              | 0.68695  | 0.0042  |
| TC0X00001679.mm.1 | <a href="#">Gemin8</a>  | gem (nuclear organelle) associated protein 8                  | 4.46 ± 0           | 4.51 ± 0.03  | 4.48 ± 0.01  | 4.43 ± 0.02  | 0.09709              | 0.94254  | 0.0039  |
| TC1100000526.mm.1 | <a href="#">Gfpt2</a>   | glutamine fructose-6-phosphate transaminase 2                 | 8.74 ± 0.17        | 8.12 ± 0.08  | 8.64 ± 0.09  | 8.03 ± 0.11  | 0.66366              | 0.00071  | 0.80432 |
| TC1400002756.mm.1 | <a href="#">Ggact</a>   | gamma-glutamylamine cyclotransferase                          | 7.67 ± 0.01        | 7.54 ± 0.03  | 7.69 ± 0.01  | 7.54 ± 0.07  | 0.7675               | 0.00237  | 0.87823 |
| TC1500001136.mm.1 | <a href="#">Ghr</a>     | growth hormone receptor                                       | 8.24 ± 0.07        | 7.84 ± 0.08  | 7.95 ± 0.07  | 7.91 ± 0.06  | 0.09254              | 0.0054   | 0.01459 |
| TC0500001625.mm.1 | <a href="#">Gigyf1</a>  | GRB10 interacting GYF protein 1                               | 7.55 ± 0.02        | 7.69 ± 0.01  | 7.68 ± 0.02  | 7.68 ± 0.02  | 0.00558              | 0.00326  | 0.00349 |
| TC0600003501.mm.1 | <a href="#">Gimap5</a>  | GTPase, IMAP family member 5                                  | 5.33 ± 0.03        | 5.5 ± 0.02   | 5.46 ± 0.02  | 5.43 ± 0     | 0.53665              | 0.0138   | 0.00099 |

Supplemental Table I

| Probe Set ID      | Symbol                   | Annotations<br>Description                                      | Summary Statistics |             |              |              | 2 way ANOVA p-values |          |         |
|-------------------|--------------------------|-----------------------------------------------------------------|--------------------|-------------|--------------|--------------|----------------------|----------|---------|
|                   |                          |                                                                 | XY sh              | XY Or       | XX sh        | XX Or        | XY vs XX             | Sh vs Or | Intrxn  |
| TC0100000971.mm.1 | <a href="#">Gin1</a>     | gypsy retrotransposon integrase 1                               | 5.06 ± 0.07        | 4.93 ± 0.04 | 5.12 ± 0.07  | 4.92 ± 0.05  | 0.92805              | 0.00824  | 0.87955 |
| TC0800000930.mm.1 | <a href="#">Gipc1</a>    | GIPC PDZ domain containing family, member 1                     | 8.1 ± 0.03         | 8.13 ± 0.02 | 8.21 ± 0.04  | 8.2 ± 0.03   | 0.00652              | 0.51088  | 0.42016 |
| TC0900001939.mm.1 | <a href="#">Glb112</a>   | galactosidase, beta 1-like 2                                    | 7.03 ± 0.07        | 6.62 ± 0.07 | 6.76 ± 0.05  | 6.67 ± 0.11  | 0.13296              | 0.00569  | 0.05512 |
| TC0200000517.mm.1 | <a href="#">Gle1</a>     | GLE1 RNA export mediator (yeast)                                | 7.16 ± 0.03        | 7.25 ± 0.01 | 7.22 ± 0.02  | 7.16 ± 0.02  | 0.71255              | 0.45816  | 0.00564 |
| TC1000003113.mm.1 | <a href="#">Gli1</a>     | GLI-Kruppel family member GLI1                                  | 6.64 ± 0.03        | 6.66 ± 0.02 | 6.76 ± 0.04  | 6.71 ± 0.03  | 0.00479              | 0.74184  | 0.1592  |
| TC1300000105.mm.1 | <a href="#">Gli3</a>     | GLI-Kruppel family member GLI3                                  | 6.49 ± 0.05        | 6.53 ± 0.03 | 6.67 ± 0.04  | 6.45 ± 0.04  | 0.18454              | 0.06381  | 0.00482 |
| TC0400000458.mm.1 | <a href="#">Glipr2</a>   | GLI pathogenesis-related 2                                      | 7.79 ± 0.02        | 7.71 ± 0.04 | 7.86 ± 0.04  | 7.64 ± 0.04  | 0.87156              | 0.00207  | 0.04729 |
| TC0500002927.mm.1 | <a href="#">Glmn</a>     | glomulin, FKBP associated protein                               | 5.61 ± 0.02        | 5.47 ± 0.06 | 5.6 ± 0.03   | 5.5 ± 0.04   | 0.65516              | 0.00997  | 0.71184 |
| TC0800000798.mm.1 | <a href="#">Glt25d1</a>  | glycosyltransferase 25 domain containing 1                      | 8.2 ± 0.07         | 8.32 ± 0.04 | 8.27 ± 0.04  | 8.09 ± 0.04  | 0.21082              | 0.85154  | 0.00824 |
| TC0700002415.mm.1 | <a href="#">Gltscr2</a>  | glioma tumor suppressor candidate region gene 2                 | 8.25 ± 0.03        | 8.42 ± 0.03 | 8.46 ± 0.03  | 8.44 ± 0.05  | 0.00642              | 0.04312  | 0.01446 |
| TC0100001387.mm.1 | <a href="#">Glu1</a>     | glutamate-ammonia ligase (glutamine synthetase)                 | 10.82 ± 0.1        | 10.49 ± 0.1 | 10.28 ± 0.11 | 10.67 ± 0.09 | 0.0586               | 0.98596  | 0.00169 |
| TC1600001151.mm.1 | <a href="#">Glyr1</a>    | glyoxylate reductase 1 homolog (Arabidopsis)                    | 8.78 ± 0.01        | 8.76 ± 0.06 | 8.64 ± 0.01  | 8.68 ± 0.03  | 0.00713              | 0.73071  | 0.36318 |
| TC0400000384.mm.1 | <a href="#">Gm7819</a>   | SubName: Full=4933409K07Rik protein;                            | 7.64 ± 0.11        | 7.4 ± 0.07  | 7.54 ± 0.08  | 7.22 ± 0.1   | 0.13324              | 0.00882  | 0.72978 |
| TC0500001995.mm.1 | <a href="#">Gnai1</a>    | guanine nucleotide binding protein (G protein), alpha inhibiti  | 9.76 ± 0.05        | 9.61 ± 0.04 | 9.56 ± 0.03  | 9.37 ± 0.11  | 0.00694              | 0.0297   | 0.70687 |
| TC1800000694.mm.1 | <a href="#">Gnal</a>     | guanine nucleotide binding protein, alpha stimulating, olfactor | 6.02 ± 0.32        | 5.15 ± 0.09 | 4.98 ± 0.06  | 5.6 ± 0.14   | 0.30688              | 0.78347  | 0.0065  |
| TC0200002700.mm.1 | <a href="#">Gnas</a>     | GNAS (guanine nucleotide binding protein, alpha stimulating)    | 7.45 ± 0.07        | 7.37 ± 0.02 | 7.29 ± 0.04  | 7.53 ± 0.03  | 0.6845               | 0.17079  | 0.00289 |
| TC0500003737.mm.1 | <a href="#">Gnb2</a>     | guanine nucleotide binding protein (G protein), beta 2          | 7.89 ± 0.04        | 7.92 ± 0.02 | 7.99 ± 0.01  | 8.03 ± 0.03  | 0.00446              | 0.2576   | 0.7761  |
| TC0400004179.mm.1 | <a href="#">Gng10</a>    | guanine nucleotide binding protein (G protein), gamma 10        | 8.01 ± 0.03        | 8.16 ± 0.03 | 8.11 ± 0.02  | 8.07 ± 0.03  | 0.59338              | 0.04124  | 0.00282 |
| TC1000002520.mm.1 | <a href="#">Gng7</a>     | guanine nucleotide binding protein (G protein), gamma 7         | 5.97 ± 0.03        | 6.06 ± 0.01 | 6.07 ± 0.01  | 6.08 ± 0.03  | 0.00954              | 0.02123  | 0.0508  |
| TC0700000241.mm.1 | <a href="#">Gng8</a>     | guanine nucleotide binding protein (G protein), gamma 8         | 5.9 ± 0.05         | 6.21 ± 0.05 | 6.2 ± 0.05   | 6.15 ± 0.04  | 0.03029              | 0.01629  | 0.0027  |
| TC1400001665.mm.1 | <a href="#">Gnl3</a>     | guanine nucleotide binding protein-like 3 (nucleolar)           | 7.39 ± 0.05        | 7.4 ± 0.04  | 7.3 ± 0.01   | 7.23 ± 0.04  | 0.00783              | 0.52557  | 0.24796 |
| TC1300002119.mm.1 | <a href="#">Golm1</a>    | golgi membrane protein 1                                        | 7.47 ± 0.06        | 7.26 ± 0.04 | 7.35 ± 0.02  | 7.21 ± 0.06  | 0.22362              | 0.00838  | 0.7436  |
| TC1900001691.mm.1 | <a href="#">Gpam</a>     | glycerol-3-phosphate acyltransferase, mitochondrial             | 8.86 ± 0.2         | 8.48 ± 0.23 | 8.05 ± 0.23  | 9.11 ± 0.17  | 0.43727              | 0.25418  | 0.00227 |
| TC1200000848.mm.1 | <a href="#">Gpatch2l</a> | G patch domain containing 2 like                                | 7.08 ± 0.03        | 7.16 ± 0.01 | 7.2 ± 0.04   | 7.02 ± 0.05  | 0.98264              | 0.23362  | 0.0021  |
| TC0X00002211.mm.1 | <a href="#">Gpc3</a>     | glypican 3                                                      | 9.53 ± 0.09        | 9.74 ± 0.02 | 9.44 ± 0.04  | 9.71 ± 0.12  | 0.6454               | 0.00449  | 0.99749 |
| TC1400001253.mm.1 | <a href="#">Gpc6</a>     | glypican 6                                                      | 9.26 ± 0.11        | 9.53 ± 0.03 | 9.45 ± 0.07  | 9.15 ± 0.07  | 0.35249              | 0.95418  | 0.00311 |
| TC0800000348.mm.1 | <a href="#">Gpr124</a>   | G protein-coupled receptor 124                                  | 7.87 ± 0.05        | 7.92 ± 0    | 8.12 ± 0.08  | 7.87 ± 0.06  | 0.05247              | 0.15723  | 0.00886 |
| TC1200002440.mm.1 | <a href="#">Gpr132</a>   | G protein-coupled receptor 132                                  | 5.09 ± 0.07        | 5.4 ± 0.05  | 5.24 ± 0.05  | 5.31 ± 0.04  | 0.88531              | 0.00855  | 0.09377 |
| TC0500001501.mm.1 | <a href="#">Gpr133</a>   | G protein-coupled receptor 133                                  | 8.93 ± 0.14        | 8.16 ± 0.05 | 8.67 ± 0.09  | 7.96 ± 0.07  | 0.10072              | 1.5E-05  | 0.889   |
| TC0300002050.mm.1 | <a href="#">Gpr171</a>   | G protein-coupled receptor 171                                  | 5.11 ± 0.02        | 5.44 ± 0.05 | 5.27 ± 0.08  | 5.41 ± 0.09  | 0.38668              | 0.00256  | 0.21238 |
| TC1400002744.mm.1 | <a href="#">Gpr18</a>    | G protein-coupled receptor 18                                   | 5 ± 0.04           | 5.54 ± 0.06 | 5.32 ± 0.15  | 5.46 ± 0.11  | 0.23746              | 0.00305  | 0.0498  |
| TC0X00000169.mm.1 | <a href="#">Gpr34</a>    | G protein-coupled receptor 34                                   | 4.86 ± 0.05        | 4.58 ± 0.07 | 5.1 ± 0.12   | 4.65 ± 0.13  | 0.12299              | 0.00195  | 0.3606  |



Supplemental Table I

| Probe Set ID      | Symbol                   | Annotations<br>Description                                      | Summary Statistics |              |              |              | 2 way ANOVA p-values |          |         |
|-------------------|--------------------------|-----------------------------------------------------------------|--------------------|--------------|--------------|--------------|----------------------|----------|---------|
|                   |                          |                                                                 | XY sh              | XY Or        | XX sh        | XX Or        | XY vs XX             | Sh vs Or | Intrxn  |
| TC0X00000653.mm.1 | <a href="#">Gpr50</a>    | G-protein-coupled receptor 50                                   | 4.29 ± 0.02        | 4.41 ± 0.03  | 4.33 ± 0.02  | 4.43 ± 0.06  | 0.46436              | 0.00784  | 0.88527 |
| TC0800001126.mm.1 | <a href="#">Gpr56</a>    | G protein-coupled receptor 56                                   | 8.45 ± 0.13        | 8.11 ± 0.06  | 8.02 ± 0.06  | 8.3 ± 0.03   | 0.29999              | 0.92391  | 0.00774 |
| TC0X00001633.mm.1 | <a href="#">Gpr64</a>    | G protein-coupled receptor 64                                   | 5.41 ± 0.08        | 4.85 ± 0.04  | 5.35 ± 0.09  | 5.01 ± 0.07  | 0.38193              | 8.1E-05  | 0.24273 |
| TC0200000445.mm.1 | <a href="#">Gpsm1</a>    | G-protein signalling modulator 1 (AGS3-like, C. elegans)        | 6.67 ± 0.02        | 6.82 ± 0.01  | 6.81 ± 0.02  | 6.82 ± 0.04  | 0.01732              | 0.00999  | 0.02199 |
| TC0800000991.mm.1 | <a href="#">Gpt2</a>     | glutamic pyruvate transaminase (alanine aminotransferase) 2     | 7.64 ± 0.15        | 7.1 ± 0.09   | 7.05 ± 0.06  | 7.23 ± 0.05  | 0.06318              | 0.14908  | 0.00668 |
| TC1100000638.mm.1 | <a href="#">Gpx3</a>     | glutathione peroxidase 3                                        | 10.32 ± 0.13       | 9.34 ± 0.15  | 9.82 ± 0.13  | 9.72 ± 0.06  | 0.67879              | 0.00085  | 0.00385 |
| TC0700002792.mm.1 | <a href="#">Gramd1a</a>  | GRAM domain containing 1A                                       | 7.68 ± 0.01        | 7.66 ± 0.01  | 7.59 ± 0.02  | 7.68 ± 0.02  | 0.03913              | 0.03068  | 0.00285 |
| TC1500000700.mm.1 | <a href="#">Grap2</a>    | GRB2-related adaptor protein 2                                  | 5.73 ± 0.05        | 6.13 ± 0.04  | 5.8 ± 0.07   | 6.08 ± 0.08  | 0.89787              | 0.00014  | 0.5098  |
| TC1500000580.mm.1 | <a href="#">Grina</a>    | glutamate receptor, ionotropic, N-methyl D-aspartate-associated | 9.37 ± 0.18        | 8.87 ± 0.12  | 8.8 ± 0.12   | 9.36 ± 0.04  | 0.73929              | 0.9088   | 0.0014  |
| TC1900000866.mm.1 | <a href="#">Grk5</a>     | G protein-coupled receptor kinase 5                             | 8.98 ± 0.11        | 8.86 ± 0.08  | 9.16 ± 0.02  | 8.7 ± 0.09   | 0.91014              | 0.00492  | 0.07767 |
| TC0500001944.mm.1 | <a href="#">Grm3</a>     | glutamate receptor, metabotropic 3                              | 5.53 ± 0.16        | 5.88 ± 0.07  | 6.2 ± 0.1    | 5.79 ± 0.1   | 0.02247              | 0.94504  | 0.00557 |
| TC1100001688.mm.1 | <a href="#">Grn</a>      | granulin                                                        | 9.01 ± 0.03        | 8.93 ± 0.02  | 8.97 ± 0.04  | 8.83 ± 0.03  | 0.09889              | 0.00783  | 0.26387 |
| TC1100003156.mm.1 | <a href="#">Gsg2</a>     | germ cell-specific gene 2                                       | 4.41 ± 0.06        | 4.75 ± 0.09  | 4.51 ± 0.05  | 4.43 ± 0.06  | 0.10535              | 0.06989  | 0.00783 |
| TC0200000636.mm.1 | <a href="#">Gsn</a>      | gelsolin                                                        | 12.12 ± 0.04       | 11.86 ± 0.02 | 12.11 ± 0.03 | 11.79 ± 0.1  | 0.62616              | 0.0002   | 0.47156 |
| TC0100000135.mm.1 | <a href="#">Gsta3</a>    | glutathione S-transferase, alpha 3                              | 6.02 ± 0.2         | 5.41 ± 0.15  | 6.06 ± 0.1   | 5.52 ± 0.07  | 0.83047              | 0.00131  | 0.63088 |
| TC0300002728.mm.1 | <a href="#">Gstm4</a>    | glutathione S-transferase, mu 4                                 | 7.81 ± 0.05        | 7.88 ± 0.05  | 8.04 ± 0.01  | 7.99 ± 0.02  | 0.00286              | 0.66064  | 0.39457 |
| TC1000002383.mm.1 | <a href="#">Gstt1</a>    | glutathione S-transferase, theta 1                              | 7.92 ± 0.07        | 8.17 ± 0.02  | 8.37 ± 0.09  | 8.13 ± 0.08  | 0.01183              | 0.95843  | 0.00392 |
| TC1000002385.mm.1 | <a href="#">Gstt2</a>    | glutathione S-transferase, theta 2                              | 6.27 ± 0.06        | 6.31 ± 0.04  | 6.13 ± 0.05  | 6.44 ± 0.06  | 0.91152              | 0.00656  | 0.03279 |
| TC1000003226.mm.1 | <a href="#">Gstt3</a>    | glutathione S-transferase, theta 3                              | 6.4 ± 0.06         | 6.53 ± 0.01  | 6.62 ± 0.05  | 6.46 ± 0.05  | 0.09084              | 0.99412  | 0.00698 |
| TC0500001798.mm.1 | <a href="#">Gtf3a</a>    | general transcription factor III A                              | 8.02 ± 0.03        | 8.13 ± 0.03  | 8.2 ± 0.04   | 8.08 ± 0.02  | 0.07721              | 0.65259  | 0.0047  |
| TC0300002220.mm.1 | <a href="#">Gucy1a3</a>  | guanylate cyclase 1, soluble, alpha 3                           | 9.43 ± 0.06        | 9.38 ± 0.04  | 9.74 ± 0.07  | 9.26 ± 0.1   | 0.10544              | 0.00435  | 0.00373 |
| TC0X00002556.mm.1 | <a href="#">Gyk</a>      | glycerol kinase                                                 | 8.19 ± 0.21        | 7.94 ± 0.22  | 7.51 ± 0.14  | 8.5 ± 0.19   | 0.45402              | 0.17988  | 0.00326 |
| TC1700000743.mm.1 | <a href="#">H2-M10.5</a> | histocompatibility 2, M region locus 10.5                       | 4.33 ± 0.05        | 4.53 ± 0.04  | 4.3 ± 0.04   | 4.5 ± 0.06   | 0.41445              | 0.00258  | 0.83137 |
| TC1700002071.mm.1 | <a href="#">H2-M2</a>    | histocompatibility 2, M region locus 2                          | 4.8 ± 0.02         | 5.16 ± 0.08  | 4.83 ± 0.05  | 4.99 ± 0.04  | 0.20168              | 0.00026  | 0.06841 |
| TC1700000614.mm.1 | <a href="#">H2-Oa</a>    | histocompatibility 2, O region alpha locus                      | 4.89 ± 0.1         | 5.43 ± 0.05  | 5.27 ± 0.11  | 5.51 ± 0.1   | 0.0707               | 0.00335  | 0.2782  |
| TC1500000402.mm.1 | <a href="#">Has2as</a>   | HAS2 antisense RNA (non-protein coding)                         | 5.06 ± 0.03        | 4.9 ± 0.04   | 5.09 ± 0.05  | 4.87 ± 0.07  | 0.86277              | 0.00212  | 0.47403 |
| TC0800002421.mm.1 | <a href="#">Haus8</a>    | 4HAUS augmin-like complex, subunit 8                            | 7.17 ± 0.1         | 7.29 ± 0.04  | 7.05 ± 0.04  | 6.9 ± 0.02   | 0.00671              | 0.79743  | 0.03564 |
| TC1700000315.mm.1 | <a href="#">Hcfc1r1</a>  | host cell factor C1 regulator 1 (XPO1-dependent)                | 7.59 ± 0.03        | 7.68 ± 0.03  | 7.78 ± 0.03  | 7.63 ± 0.05  | 0.13233              | 0.29256  | 0.00809 |
| TC0700002758.mm.1 | <a href="#">Hcst</a>     | hematopoietic cell signal transducer                            | 5.74 ± 0.04        | 5.96 ± 0.04  | 5.85 ± 0.06  | 6.03 ± 0.09  | 0.13951              | 0.00463  | 0.69294 |
| TC0100002833.mm.1 | <a href="#">Hdlbp</a>    | high density lipoprotein (HDL) binding protein                  | 10.52 ± 0.04       | 10.32 ± 0.01 | 10.27 ± 0.02 | 10.14 ± 0.06 | 0.00016              | 0.00207  | 0.5785  |
| TC1600000475.mm.1 | <a href="#">Heg1</a>     | HEG homolog 1 (zebrafish)                                       | 10.21 ± 0.1        | 10.04 ± 0.05 | 10.24 ± 0.03 | 9.84 ± 0.04  | 0.40559              | 0.00267  | 0.06574 |
| TC0X00000919.mm.1 | <a href="#">Heph</a>     | hephaestin                                                      | 6.32 ± 0.1         | 5.99 ± 0.05  | 6.07 ± 0.01  | 5.9 ± 0.14   | 0.05344              | 0.00929  | 0.28995 |

Supplemental Table I

| Probe Set ID      | Symbol                    | Annotations<br>Description                                      | Summary Statistics |              |              |              | 2 way ANOVA p-values |          |         |
|-------------------|---------------------------|-----------------------------------------------------------------|--------------------|--------------|--------------|--------------|----------------------|----------|---------|
|                   |                           |                                                                 | XY sh              | XY Or        | XX sh        | XX Or        | XY vs XX             | Sh vs Or | Intrxn  |
| TC0700000936.mm.1 | <a href="#">Herc2</a>     | hect (homologous to the E6-AP (UBE3A) carboxyl terminus)        | 8.23 ± 0.05        | 8.06 ± 0.04  | 7.98 ± 0.03  | 7.93 ± 0.07  | 0.0043               | 0.09323  | 0.37121 |
| TC0800001106.mm.1 | <a href="#">Herpud1</a>   | homocysteine-inducible, endoplasmic reticulum stress-inducible  | 9.25 ± 0.04        | 9.49 ± 0.05  | 8.9 ± 0.01   | 9.29 ± 0.04  | 9.9E-06              | 1.5E-06  | 0.11213 |
| TC1100002060.mm.1 | <a href="#">Hexdc</a>     | hexosaminidase (glycosyl hydrolase family 20, catalytic domain) | 6.1 ± 0.02         | 6.19 ± 0     | 6.15 ± 0.02  | 6.15 ± 0     | 0.53126              | 0.00787  | 0.00617 |
| TC0300001616.mm.1 | <a href="#">Hey1</a>      | hairy/enhancer-of-split related with YRPW motif 1               | 7.19 ± 0.11        | 7.24 ± 0.04  | 7.07 ± 0.05  | 7.47 ± 0.07  | 0.35445              | 0.00918  | 0.10712 |
| TC0100003827.mm.1 | <a href="#">Hhat</a>      | hedgehog acyltransferase                                        | 5.53 ± 0.04        | 5.59 ± 0.02  | 5.68 ± 0.03  | 5.55 ± 0.01  | 0.12576              | 0.22904  | 0.00794 |
| TC0600002109.mm.1 | <a href="#">Hipk2</a>     | homeodomain interacting protein kinase 2                        | 9.19 ± 0.15        | 8.94 ± 0.12  | 8.93 ± 0.12  | 9.31 ± 0.04  | 0.91416              | 0.96656  | 0.00725 |
| TC1300000255.mm.1 | <a href="#">Hist1h2bc</a> | histone cluster 1, H2bc                                         | 9.57 ± 0.05        | 9.35 ± 0.03  | 9.5 ± 0.06   | 9.32 ± 0.09  | 0.27054              | 0.00278  | 0.55    |
| TC0300000930.mm.1 | <a href="#">Hist2h2be</a> | histone cluster 2, H2be                                         | 7.27 ± 0.07        | 7.19 ± 0.09  | 7.46 ± 0.06  | 6.97 ± 0.14  | 0.75426              | 0.00513  | 0.06556 |
| TC1100000712.mm.1 | <a href="#">Hist3h2ba</a> | histone cluster 3, H2ba                                         | 6.43 ± 0.04        | 6.51 ± 0.02  | 6.36 ± 0.04  | 6.64 ± 0.07  | 0.41604              | 0.00099  | 0.04319 |
| TC1100003529.mm.1 | <a href="#">Hlf</a>       | hepatic leukemia factor                                         | 6.76 ± 0.08        | 7.32 ± 0.13  | 6.39 ± 0.03  | 7.27 ± 0.08  | 0.02993              | 1.9E-06  | 0.08631 |
| TC1300001353.mm.1 | <a href="#">Hmgcs1</a>    | 3-hydroxy-3-methylglutaryl-Coenzyme A synthase 1                | 9.93 ± 0.24        | 9.42 ± 0.21  | 9.28 ± 0.15  | 9.98 ± 0.08  | 0.5828               | 0.86276  | 0.00434 |
| TC1600002139.mm.1 | <a href="#">Hmgn1</a>     | high mobility group nucleosomal binding domain 1                | 7.4 ± 0.05         | 7.57 ± 0.03  | 7.53 ± 0.02  | 7.49 ± 0     | 0.34176              | 0.07126  | 0.00524 |
| TC0800000843.mm.1 | <a href="#">Hmgxb4</a>    | HMG box domain containing 4                                     | 6.66 ± 0.04        | 6.76 ± 0.01  | 6.85 ± 0.04  | 6.68 ± 0.05  | 0.20681              | 0.42746  | 0.00515 |
| TC1000000836.mm.1 | <a href="#">Hmha1</a>     | histocompatibility (minor) HA-1                                 | 6.76 ± 0.03        | 6.95 ± 0.02  | 6.85 ± 0.04  | 6.97 ± 0.08  | 0.22766              | 0.00487  | 0.53887 |
| TC0800000742.mm.1 | <a href="#">Homer3</a>    | homer homolog 3 (Drosophila)                                    | 6.92 ± 0.02        | 7.03 ± 0.02  | 7.07 ± 0.02  | 7.03 ± 0.02  | 0.0063               | 0.1489   | 0.00773 |
| TC1400002069.mm.1 | <a href="#">Homez</a>     | homeodomain leucine zipper-encoding gene                        | 5.44 ± 0.02        | 5.39 ± 0.01  | 5.46 ± 0.03  | 5.34 ± 0.03  | 0.45488              | 0.00355  | 0.0974  |
| TC0600002284.mm.1 | <a href="#">Hoxa10</a>    | homeobox A10                                                    | 6.6 ± 0.03         | 6.6 ± 0.03   | 6.96 ± 0.11  | 6.54 ± 0.05  | 0.02364              | 0.00419  | 0.00407 |
| TC0600002285.mm.1 | <a href="#">Hoxa11</a>    | homeobox A11                                                    | 5.12 ± 0.04        | 5.13 ± 0.04  | 5.49 ± 0.07  | 5.13 ± 0.06  | 0.00604              | 0.00485  | 0.00471 |
| TC1100001492.mm.1 | <a href="#">Hoxb9</a>     | homeobox B9                                                     | 6.59 ± 0.02        | 6.76 ± 0.03  | 6.68 ± 0.01  | 6.67 ± 0.02  | 0.79486              | 0.0014   | 0.00086 |
| TC0800002905.mm.1 | <a href="#">Hp</a>        | haptoglobin                                                     | 9.91 ± 0.08        | 8.62 ± 0.28  | 8.98 ± 0.23  | 9.08 ± 0.18  | 0.20454              | 0.00736  | 0.00249 |
| TC0400001720.mm.1 | <a href="#">Hp1bp3</a>    | heterochromatin protein 1, binding protein 3                    | 8.68 ± 0.04        | 8.76 ± 0.03  | 8.76 ± 0.03  | 8.34 ± 0.13  | 0.02779              | 0.02588  | 0.00198 |
| TC0600002404.mm.1 | <a href="#">Hpgds</a>     | hematopoietic prostaglandin D synthase                          | 6.31 ± 0.08        | 6.05 ± 0.07  | 6.45 ± 0.09  | 6.07 ± 0.1   | 0.33237              | 0.0042   | 0.45767 |
| TC1900001532.mm.1 | <a href="#">Hpse2</a>     | heparanase 2                                                    | 6.57 ± 0.13        | 5.91 ± 0.06  | 6.5 ± 0.14   | 5.78 ± 0.13  | 0.56957              | 0.00011  | 0.66018 |
| TC0100003836.mm.1 | <a href="#">Hsd11b1</a>   | hydroxysteroid 11-beta dehydrogenase 1                          | 6.43 ± 0.06        | 6.28 ± 0.06  | 6.59 ± 0.05  | 6.15 ± 0.04  | 0.98973              | 0.00011  | 0.04794 |
| TC0700004630.mm.1 | <a href="#">Hsd3b7</a>    | hydroxy-delta-5-steroid dehydrogenase, 3 beta- and steroid      | 7.26 ± 0.06        | 7.08 ± 0.06  | 7.1 ± 0.05   | 7.18 ± 0.03  | 0.30213              | 0.15134  | 0.00959 |
| TC1100001346.mm.1 | <a href="#">Hsf5</a>      | heat shock transcription factor family member 5                 | 4.2 ± 0.02         | 4.41 ± 0.06  | 4.32 ± 0.04  | 4.41 ± 0.05  | 0.27149              | 0.00772  | 0.22556 |
| TC1700002151.mm.1 | <a href="#">Hsp90ab1</a>  | heat shock protein 90 alpha (cytosolic), class B member 1       | 12.22 ± 0.09       | 12.07 ± 0.05 | 11.94 ± 0.03 | 11.88 ± 0.03 | 0.00481              | 0.23447  | 0.8008  |
| TC1000002627.mm.1 | <a href="#">Hsp90b1</a>   | heat shock protein 90, beta (Grp94), member 1                   | 11.21 ± 0.1        | 10.94 ± 0.04 | 11.05 ± 0.06 | 10.72 ± 0.05 | 0.04075              | 0.00238  | 0.33409 |
| TC1200000679.mm.1 | <a href="#">Hspa2</a>     | heat shock protein 2                                            | 5.93 ± 0.05        | 6.25 ± 0.08  | 6.07 ± 0.06  | 5.97 ± 0.01  | 0.23737              | 0.08316  | 0.00279 |
| TC1100002725.mm.1 | <a href="#">Hspa4</a>     | heat shock protein 4                                            | 9.97 ± 0.04        | 9.9 ± 0.04   | 9.83 ± 0.02  | 9.75 ± 0.05  | 0.00376              | 0.08714  | 0.70093 |
| TC0500001590.mm.1 | <a href="#">Hspb1</a>     | heat shock protein 1                                            | 9.62 ± 0.15        | 9.57 ± 0.18  | 9.34 ± 0.08  | 8.79 ± 0.08  | 0.00472              | 0.10829  | 0.03995 |
| TC0900002751.mm.1 | <a href="#">Htr1b</a>     | 5-hydroxytryptamine (serotonin) receptor 1B                     | 8.17 ± 0.21        | 8.4 ± 0.11   | 8.52 ± 0.14  | 7.7 ± 0.17   | 0.42158              | 0.14396  | 0.00574 |

Supplemental Table I

| Probe Set ID      | Symbol                   | Annotations<br>Description                                      | Summary Statistics |             |             |             | 2 way ANOVA p-values |          |         |
|-------------------|--------------------------|-----------------------------------------------------------------|--------------------|-------------|-------------|-------------|----------------------|----------|---------|
|                   |                          |                                                                 | XY sh              | XY Or       | XX sh       | XX Or       | XY vs XX             | Sh vs Or | Intrxn  |
| TC0900002245.mm.1 | <a href="#">Htr3a</a>    | 5-hydroxytryptamine (serotonin) receptor 3A                     | 8.41 ± 0.78        | 7.18 ± 0.47 | 5.69 ± 0.27 | 8.62 ± 0.34 | 0.40427              | 0.09413  | 0.00446 |
| TC1900001435.mm.1 | <a href="#">Htr7</a>     | 5-hydroxytryptamine (serotonin) receptor 7                      | 4.55 ± 0.03        | 4.72 ± 0.04 | 4.57 ± 0.03 | 4.71 ± 0.06 | 0.99349              | 0.00267  | 0.80409 |
| TC0700001913.mm.1 | <a href="#">Htra1</a>    | HtrA serine peptidase 1                                         | 9.36 ± 0.1         | 9.62 ± 0.04 | 9.51 ± 0.06 | 9.23 ± 0.06 | 0.1849               | 0.96466  | 0.00239 |
| TC0500002252.mm.1 | <a href="#">Htra3</a>    | HtrA serine peptidase 3                                         | 9.11 ± 0.07        | 8.97 ± 0.04 | 9.13 ± 0.02 | 8.84 ± 0.1  | 0.42673              | 0.00565  | 0.25116 |
| TC0800001902.mm.1 | <a href="#">Htra4</a>    | HtrA serine peptidase 4                                         | 8.32 ± 0.24        | 7.53 ± 0.09 | 8.15 ± 0.15 | 7.54 ± 0.17 | 0.97091              | 0.00541  | 0.9898  |
| TC0500001382.mm.1 | <a href="#">Hvcn1</a>    | hydrogen voltage-gated channel 1                                | 5.84 ± 0.07        | 6.23 ± 0.07 | 6.17 ± 0.09 | 6.3 ± 0.08  | 0.04265              | 0.00869  | 0.21998 |
| TC0400001305.mm.1 | <a href="#">Hyi</a>      | hydroxypyruvate isomerase homolog (E. coli)                     | 7.59 ± 0.04        | 7.74 ± 0.01 | 7.77 ± 0.03 | 7.81 ± 0.06 | 0.00449              | 0.02253  | 0.13755 |
| TC1300000572.mm.1 | <a href="#">Iars</a>     | isoleucine-tRNA synthetase                                      | 8.61 ± 0.05        | 8.45 ± 0.02 | 8.35 ± 0.01 | 8.26 ± 0.08 | 0.00094              | 0.04119  | 0.52291 |
| TC0500001023.mm.1 | <a href="#">Ibsp</a>     | integrin binding sialoprotein                                   | 4.09 ± 0.05        | 4 ± 0.05    | 4.46 ± 0.13 | 4.06 ± 0.03 | 0.01519              | 0.00503  | 0.0581  |
| TC0200002298.mm.1 | <a href="#">Id1</a>      | inhibitor of DNA binding 1                                      | 8.56 ± 0.04        | 8.78 ± 0.11 | 8.23 ± 0.08 | 8.56 ± 0.04 | 0.00109              | 0.00175  | 0.38643 |
| TC1900001454.mm.1 | <a href="#">Ide</a>      | insulin degrading enzyme                                        | 9.6 ± 0.14         | 9.57 ± 0.07 | 9.23 ± 0.1  | 9.29 ± 0.05 | 0.00242              | 0.63429  | 0.30486 |
| TC1700000703.mm.1 | <a href="#">Ier3</a>     | immediate early response 3                                      | 6.99 ± 0.04        | 7.28 ± 0.06 | 6.77 ± 0.04 | 7.24 ± 0.08 | 0.05045              | 1.7E-05  | 0.14396 |
| TC0100003599.mm.1 | <a href="#">Ifi202b</a>  | interferon activated gene 202B                                  | 5.48 ± 0.11        | 4.74 ± 0.09 | 4.86 ± 0.06 | 4.59 ± 0.05 | 0.0019               | 0.00015  | 0.04898 |
| TC0100003888.mm.1 | <a href="#">Ifi204</a>   | interferon activated gene 204                                   | 8.35 ± 0.17        | 7.57 ± 0.13 | 7.69 ± 0.07 | 7.48 ± 0.11 | 0.03185              | 0.0058   | 0.10334 |
| TC1200002269.mm.1 | <a href="#">Ifi27l2a</a> | interferon, alpha-inducible protein 27 like 2A                  | 9.7 ± 0.15         | 8.59 ± 0.2  | 9.06 ± 0.12 | 8.9 ± 0.13  | 0.24725              | 0.00093  | 0.00735 |
| TC0600003422.mm.1 | <a href="#">Ifitd1</a>   | intermediate filament tail domain containing 1                  | 5.42 ± 0.06        | 5.65 ± 0.04 | 5.86 ± 0.09 | 5.56 ± 0.08 | 0.02143              | 0.6507   | 0.00191 |
| TC1200001663.mm.1 | <a href="#">Ifrd1</a>    | interferon-related developmental regulator 1                    | 7.52 ± 0.07        | 7.53 ± 0.07 | 7.34 ± 0.04 | 7.15 ± 0.07 | 0.0007               | 0.15281  | 0.1576  |
| TC0900001377.mm.1 | <a href="#">Ifrd2</a>    | interferon-related developmental regulator 2                    | 8.11 ± 0.04        | 8.27 ± 0.02 | 7.96 ± 0.01 | 8.21 ± 0.04 | 0.00481              | 5.3E-05  | 0.118   |
| TC0600001288.mm.1 | <a href="#">Ifi122</a>   | intraflagellar transport 122                                    | 6.57 ± 0.01        | 6.56 ± 0    | 6.59 ± 0.02 | 6.51 ± 0.02 | 0.60655              | 0.00484  | 0.01568 |
| TC1500001826.mm.1 | <a href="#">Ifi27</a>    | intraflagellar transport 27                                     | 7.17 ± 0.04        | 7.25 ± 0.03 | 7.34 ± 0.06 | 7.2 ± 0.01  | 0.11789              | 0.54779  | 0.0099  |
| TC1200000846.mm.1 | <a href="#">Ifi43</a>    | intraflagellar transport 43 homolog (Chlamydomonas)             | 8.29 ± 0.13        | 8.44 ± 0.04 | 8.58 ± 0.07 | 8.01 ± 0.16 | 0.59151              | 0.10017  | 0.00592 |
| TC0900000829.mm.1 | <a href="#">Igdcc4</a>   | immunoglobulin superfamily, DCC subclass, member 4              | 6.18 ± 0.03        | 6.36 ± 0.04 | 6.31 ± 0.02 | 6.37 ± 0.04 | 0.0601               | 0.00569  | 0.15576 |
| TC1000001066.mm.1 | <a href="#">Igf1</a>     | insulin-like growth factor 1                                    | 7.42 ± 0.09        | 7.09 ± 0.04 | 7.17 ± 0.06 | 6.82 ± 0.15 | 0.02967              | 0.00575  | 0.73027 |
| TC1700000355.mm.1 | <a href="#">Igfals</a>   | insulin-like growth factor binding protein, acid labile subunit | 5.21 ± 0.09        | 4.96 ± 0.13 | 4.65 ± 0.14 | 5.18 ± 0.05 | 0.12197              | 0.23218  | 0.00278 |
| TC1100002195.mm.1 | <a href="#">Igfbp3</a>   | insulin-like growth factor binding protein 3                    | 7.23 ± 0.21        | 7.4 ± 0.14  | 6.6 ± 0.15  | 7.47 ± 0.15 | 0.13325              | 0.0098   | 0.06263 |
| TC1500001089.mm.1 | <a href="#">Igfbp6</a>   | insulin-like growth factor binding protein 6                    | 9.01 ± 0.11        | 8.47 ± 0.08 | 8.96 ± 0.07 | 8.58 ± 0.04 | 0.366                | 0.0003   | 0.70688 |
| TC0400002587.mm.1 | <a href="#">Igfbp1</a>   | insulin-like growth factor binding protein-like 1               | 5.61 ± 0.03        | 5.79 ± 0.03 | 5.68 ± 0.05 | 5.85 ± 0.11 | 0.24484              | 0.00884  | 0.88024 |
| TC1200002537.mm.1 | <a href="#">Igha</a>     | Igha immunoglobulin heavy constant alpha                        | 5.67 ± 0.09        | 6.04 ± 0.1  | 6.12 ± 0.1  | 6.65 ± 0.19 | 0.00162              | 0.00477  | 0.38945 |
| TC1200002540.mm.1 | <a href="#">Ighg1</a>    | immunoglobulin heavy constant gamma 1 (G1m marker)              | 4.16 ± 0.04        | 4.51 ± 0.06 | 4.3 ± 0.07  | 4.54 ± 0.09 | 0.36415              | 0.00104  | 0.64732 |
| TC1200002539.mm.1 | <a href="#">Ighg2b</a>   | immunoglobulin heavy constant gamma 2B                          | 5.24 ± 0.06        | 5.55 ± 0.15 | 5.73 ± 0.23 | 6.52 ± 0.4  | 0.00797              | 0.03529  | 0.30992 |
| TC1200002541.mm.1 | <a href="#">Ighg3</a>    | Ighg3 Immunoglobulin heavy constant gamma 3                     | 4.85 ± 0.04        | 4.96 ± 0.01 | 4.97 ± 0.03 | 5.21 ± 0.08 | 0.00169              | 0.00251  | 0.12938 |
| TC1200002613.mm.1 | <a href="#">Ighv1-20</a> | immunoglobulin heavy variable V1-20                             | 3.85 ± 0.04        | 3.9 ± 0.08  | 3.95 ± 0.21 | 4.74 ± 0.2  | 0.00775              | 0.0147   | 0.01963 |

Supplemental Table I

| Probe Set ID      | Symbol                    | Annotations<br>Description                       | Summary Statistics |             |             |             | 2 way ANOVA p-values |          |         |
|-------------------|---------------------------|--------------------------------------------------|--------------------|-------------|-------------|-------------|----------------------|----------|---------|
|                   |                           |                                                  | XY sh              | XY Or       | XX sh       | XX Or       | XY vs XX             | Sh vs Or | Intrxn  |
| TC1200002617.mm.1 | <a href="#">Ighv1-26</a>  | immunoglobulin heavy variable 1-26               | 4.15 ± 0.11        | 4.49 ± 0.16 | 4.7 ± 0.21  | 5.26 ± 0.24 | 0.00382              | 0.03461  | 0.45951 |
| TC1200002593.mm.1 | <a href="#">Ighv13-2</a>  | Ighv13-2 immunoglobulin heavy variable 13-2      | 4.9 ± 0.11         | 5.05 ± 0.1  | 4.76 ± 0.13 | 5.43 ± 0.06 | 0.43026              | 0.00396  | 0.01775 |
| TC1200002620.mm.1 | <a href="#">Ighv1-34</a>  | immunoglobulin heavy variable 1-34               | 5.47 ± 0.11        | 5.83 ± 0.23 | 5.76 ± 0.24 | 6.67 ± 0.2  | 0.01945              | 0.00918  | 0.12032 |
| TC1200002655.mm.1 | <a href="#">Ighv1-75</a>  | immunoglobulin heavy variable 1-75               | 4.71 ± 0.15        | 4.99 ± 0.14 | 4.95 ± 0.12 | 5.74 ± 0.2  | 0.01114              | 0.00687  | 0.07647 |
| TC1200002664.mm.1 | <a href="#">Ighv1-85</a>  | immunoglobulin heavy variable 1-85               | 4.66 ± 0.12        | 4.85 ± 0.14 | 4.77 ± 0.17 | 5.71 ± 0.18 | 0.01295              | 0.00483  | 0.01348 |
| TC1200002554.mm.1 | <a href="#">Ighv5-2</a>   | immunoglobulin heavy variable 5-2                | 3.8 ± 0.11         | 4.22 ± 0.05 | 4.08 ± 0.06 | 4.13 ± 0.05 | 0.20962              | 0.00957  | 0.03172 |
| TC1200002558.mm.1 | <a href="#">Ighv5-6</a>   | immunoglobulin heavy variable 5-6                | 4.43 ± 0.08        | 4.98 ± 0.2  | 4.6 ± 0.21  | 4.98 ± 0.1  | 0.49628              | 0.00781  | 0.51024 |
| TC1200002583.mm.1 | <a href="#">Ighv9-1</a>   | immunoglobulin heavy variable 9-1                | 5.11 ± 0.08        | 5.55 ± 0.18 | 5.35 ± 0.1  | 5.84 ± 0.17 | 0.07082              | 0.00463  | 0.80813 |
| TC0600000811.mm.1 | <a href="#">Igkj3</a>     | immunoglobulin kappa joining 3                   | 5.2 ± 0.1          | 5.81 ± 0.11 | 5.53 ± 0.1  | 5.79 ± 0.19 | 0.32333              | 0.00793  | 0.27478 |
| TC0600003517.mm.1 | <a href="#">Igvk1-110</a> | immunoglobulin kappa variable 1-110              | 6.42 ± 0.1         | 8.04 ± 0.42 | 7.25 ± 0.25 | 7.97 ± 0.25 | 0.18694              | 0.00074  | 0.1168  |
| TC0600003513.mm.1 | <a href="#">Igvk1-122</a> | immunoglobulin kappa chain variable 1-122        | 6.3 ± 0.1          | 7.54 ± 0.35 | 6.87 ± 0.18 | 7.62 ± 0.14 | 0.13264              | 0.0003   | 0.24686 |
| TC0600003507.mm.1 | <a href="#">Igvk1-132</a> | immunoglobulin kappa variable 1-132              | 4.2 ± 0.1          | 4.7 ± 0.05  | 4.69 ± 0.12 | 4.89 ± 0.12 | 0.00682              | 0.00538  | 0.20605 |
| TC0600003506.mm.1 | <a href="#">Igvk1-133</a> | immunoglobulin kappa variable 1-133              | 4.65 ± 0.14        | 5.17 ± 0.04 | 5 ± 0.25    | 5.73 ± 0.19 | 0.02734              | 0.00419  | 0.45202 |
| TC0600002445.mm.1 | <a href="#">Igvk12-38</a> | immunoglobulin kappa chain variable 12-38        | 4.49 ± 0.03        | 4.73 ± 0.1  | 4.53 ± 0.02 | 4.76 ± 0.07 | 0.58984              | 0.0025   | 0.99968 |
| TC0600003596.mm.1 | <a href="#">Igvk6-14</a>  | immunoglobulin kappa variable 6-14               | 4.95 ± 0.12        | 5.2 ± 0.03  | 5.22 ± 0.04 | 5.61 ± 0.14 | 0.00607              | 0.01022  | 0.41044 |
| TC0600003595.mm.1 | <a href="#">Igvk6-15</a>  | immunoglobulin kappa variable 6-15               | 4.42 ± 0.17        | 4.71 ± 0.12 | 5.26 ± 0.38 | 6.19 ± 0.38 | 0.00143              | 0.06031  | 0.21897 |
| TC0600002448.mm.1 | <a href="#">Igvk8-34</a>  | Igvk8-34 immunoglobulin kappa variable 8-34      | 6.07 ± 0.02        | 6.23 ± 0.05 | 6.08 ± 0.05 | 6.22 ± 0.05 | 0.96779              | 0.00433  | 0.69275 |
| TC0100002597.mm.1 | <a href="#">Ihh</a>       | Indian hedgehog                                  | 5.78 ± 0.09        | 6.01 ± 0.07 | 5.83 ± 0.07 | 6.04 ± 0.08 | 0.33932              | 0.0063   | 0.53411 |
| TC1100003680.mm.1 | <a href="#">Ikbzf3</a>    | IKAROS family zinc finger 3                      | 5.07 ± 0.07        | 5.57 ± 0.06 | 5.37 ± 0.08 | 5.69 ± 0.14 | 0.07861              | 0.00122  | 0.50612 |
| TC0400000381.mm.1 | <a href="#">Il11ra1</a>   | interleukin 11 receptor, alpha chain 1           | 7.55 ± 0.07        | 7.77 ± 0.02 | 7.77 ± 0.06 | 7.62 ± 0.02 | 0.36714              | 0.37191  | 0.00249 |
| TC0200000222.mm.1 | <a href="#">Il15ra</a>    | interleukin 15 receptor, alpha chain             | 6.66 ± 0.07        | 6.6 ± 0.07  | 6.41 ± 0.05 | 6.72 ± 0.08 | 0.18016              | 0.21624  | 0.00914 |
| TC0100000295.mm.1 | <a href="#">Il1r1</a>     | interleukin 1 receptor, type I                   | 8.77 ± 0.12        | 8.74 ± 0.08 | 9.01 ± 0.08 | 8.37 ± 0.12 | 0.57524              | 0.00709  | 0.01213 |
| TC0100000297.mm.1 | <a href="#">Il1r2</a>     | interleukin 1 receptor-like 2                    | 6.15 ± 0.06        | 5.62 ± 0.05 | 5.95 ± 0.06 | 5.55 ± 0.11 | 0.12992              | 4.1E-05  | 0.54051 |
| TC0700001794.mm.1 | <a href="#">Il21r</a>     | interleukin 21 receptor                          | 5.42 ± 0.02        | 5.63 ± 0.02 | 5.46 ± 0.06 | 5.7 ± 0.09  | 0.31696              | 0.00112  | 0.7531  |
| TC0700004287.mm.1 | <a href="#">Il27</a>      | interleukin 27                                   | 5.38 ± 0.03        | 5.6 ± 0.04  | 5.49 ± 0.04 | 5.64 ± 0.09 | 0.30034              | 0.00979  | 0.70619 |
| TC0800002565.mm.1 | <a href="#">Il27ra</a>    | interleukin 27 receptor, alpha                   | 6.47 ± 0.03        | 6.68 ± 0.05 | 6.55 ± 0.02 | 6.58 ± 0.03 | 0.64737              | 0.00655  | 0.04302 |
| TC1300002679.mm.1 | <a href="#">Il31ra</a>    | interleukin 31 receptor A                        | 5.79 ± 0.1         | 5.55 ± 0.04 | 5.54 ± 0    | 5.31 ± 0.01 | 0.00532              | 0.00613  | 0.77742 |
| TC0300002357.mm.1 | <a href="#">Il6ra</a>     | interleukin 6 receptor, alpha                    | 7.69 ± 0.08        | 7.38 ± 0.04 | 7.51 ± 0.01 | 7.31 ± 0.02 | 0.05377              | 0.0006   | 0.50287 |
| TC1500001197.mm.1 | <a href="#">Il7r</a>      | interleukin 7 receptor                           | 5.44 ± 0.11        | 5.73 ± 0.1  | 5.32 ± 0.04 | 5.29 ± 0.06 | 0.00744              | 0.16244  | 0.09161 |
| TC0100001533.mm.1 | <a href="#">Ildr2</a>     | immunoglobulin-like domain containing receptor 2 | 7 ± 0.06           | 6.8 ± 0.03  | 7.17 ± 0.12 | 6.74 ± 0.05 | 0.30899              | 0.00118  | 0.08248 |
| TC0800000091.mm.1 | <a href="#">Ing1</a>      | inhibitor of growth family, member 1             | 7.49 ± 0.04        | 7.64 ± 0.02 | 7.56 ± 0.01 | 7.55 ± 0.01 | 0.88618              | 0.0217   | 0.00791 |
| TC1300000113.mm.1 | <a href="#">Inhba</a>     | inhibin beta-A                                   | 7.44 ± 0.1         | 7.64 ± 0.03 | 7.84 ± 0.08 | 7.37 ± 0.11 | 0.43335              | 0.16968  | 0.00153 |

Supplemental Table I

| Probe Set ID      | Symbol                  | Annotations<br>Description                                   | Summary Statistics |              |              |              | 2 way ANOVA p-values |          |         |
|-------------------|-------------------------|--------------------------------------------------------------|--------------------|--------------|--------------|--------------|----------------------|----------|---------|
|                   |                         |                                                              | XY sh              | XY Or        | XX sh        | XX Or        | XY vs XX             | Sh vs Or | Intrxn  |
| TC0100002945.mm.1 | <a href="#">Inhbb</a>   | inhibin beta-B                                               | 6.61 ± 0.07        | 6.83 ± 0.09  | 6.98 ± 0.03  | 6.98 ± 0.07  | 0.00302              | 0.20395  | 0.18459 |
| TC0600002326.mm.1 | <a href="#">Inmt</a>    | indolethylamine N-methyltransferase                          | 9.11 ± 0.11        | 8.6 ± 0.15   | 8.99 ± 0.07  | 8.6 ± 0.07   | 0.70328              | 0.00155  | 0.7016  |
| TC0400001425.mm.1 | <a href="#">Inpp5b</a>  | inositol polyphosphate-5-phosphatase B                       | 7.16 ± 0.03        | 7.1 ± 0.05   | 7.24 ± 0.04  | 7 ± 0.03     | 0.86863              | 0.00328  | 0.03654 |
| TC0800001608.mm.1 | <a href="#">Insr</a>    | insulin receptor                                             | 8.33 ± 0.07        | 8.31 ± 0.03  | 8.07 ± 0.07  | 8.14 ± 0.03  | 0.00206              | 0.71526  | 0.4111  |
| TC1400002863.mm.1 | <a href="#">Ipo4</a>    | importin 4                                                   | 7.76 ± 0.02        | 7.68 ± 0     | 7.66 ± 0.01  | 7.61 ± 0.03  | 0.00107              | 0.00677  | 0.80639 |
| TC0700001620.mm.1 | <a href="#">Ipo7</a>    | importin 7                                                   | 8.84 ± 0.05        | 8.84 ± 0.05  | 8.69 ± 0.03  | 8.61 ± 0.07  | 0.00295              | 0.46566  | 0.44558 |
| TC1300002463.mm.1 | <a href="#">Iqgap2</a>  | IQ motif containing GTPase activating protein 2              | 7.67 ± 0.2         | 6.81 ± 0.1   | 7 ± 0.06     | 6.76 ± 0.08  | 0.04989              | 0.0035   | 0.09265 |
| TC0X00001538.mm.1 | <a href="#">Iqsec2</a>  | IQ motif and Sec7 domain 2                                   | 7.54 ± 0.03        | 7.61 ± 0     | 7.68 ± 0.02  | 7.63 ± 0.02  | 0.00524              | 0.93454  | 0.03242 |
| TC0800003193.mm.1 | <a href="#">Irf2bp2</a> | interferon regulatory factor 2 binding protein 2             | 8.92 ± 0.09        | 9.1 ± 0.05   | 9.09 ± 0.02  | 8.85 ± 0.08  | 0.66971              | 0.75807  | 0.00943 |
| TC1200002110.mm.1 | <a href="#">Irf2bpl</a> | interferon regulatory factor 2 binding protein-like          | 8.18 ± 0.07        | 8.24 ± 0.04  | 8.45 ± 0.05  | 8.11 ± 0.1   | 0.27493              | 0.07683  | 0.0085  |
| TC0300000709.mm.1 | <a href="#">Isg20l2</a> | interferon stimulated exonuclease gene 20-like 2             | 6.88 ± 0.04        | 6.79 ± 0.06  | 6.89 ± 0.07  | 6.51 ± 0.11  | 0.09243              | 0.00685  | 0.05676 |
| TC0200002089.mm.1 | <a href="#">Ism1</a>    | isthmin 1 homolog (zebrafish)                                | 7.21 ± 0.07        | 6.83 ± 0.04  | 7.17 ± 0.07  | 6.64 ± 0.06  | 0.07215              | 4.5E-06  | 0.22481 |
| TC1800000590.mm.1 | <a href="#">Isoc1</a>   | isochorismatase domain containing 1                          | 8.72 ± 0.21        | 8.27 ± 0.12  | 8.27 ± 0.12  | 8.67 ± 0.06  | 0.72166              | 0.73626  | 0.00963 |
| TC0800000756.mm.1 | <a href="#">Isyna1</a>  | myo-inositol 1-phosphate synthase A1                         | 7.86 ± 0.07        | 7.93 ± 0.03  | 8.06 ± 0.05  | 7.82 ± 0.04  | 0.27535              | 0.14908  | 0.00667 |
| TC0900000791.mm.1 | <a href="#">Itga11</a>  | integrin alpha 11                                            | 6.76 ± 0.04        | 6.83 ± 0.02  | 6.97 ± 0.02  | 6.76 ± 0.05  | 0.07177              | 0.07194  | 0.00233 |
| TC0900001563.mm.1 | <a href="#">Itga9</a>   | integrin alpha 9                                             | 10.25 ± 0.18       | 10.49 ± 0.06 | 10.51 ± 0.09 | 10.02 ± 0.07 | 0.52612              | 0.40401  | 0.0073  |
| TC0700001875.mm.1 | <a href="#">Itgam</a>   | integrin alpha M                                             | 7.21 ± 0.06        | 6.89 ± 0.12  | 7.05 ± 0.05  | 6.63 ± 0.06  | 0.02384              | 0.00042  | 0.40414 |
| TC1100001730.mm.1 | <a href="#">Itgb3</a>   | integrin beta 3                                              | 8.83 ± 0.19        | 8.97 ± 0.03  | 9.3 ± 0.13   | 8.46 ± 0.18  | 0.98555              | 0.05559  | 0.00653 |
| TC1600000480.mm.1 | <a href="#">Itgb5</a>   | integrin beta 5                                              | 10.6 ± 0.13        | 10.83 ± 0.05 | 10.9 ± 0.07  | 10.54 ± 0.08 | 0.78043              | 0.67458  | 0.00563 |
| TC0200002945.mm.1 | <a href="#">Itih2</a>   | inter-alpha trypsin inhibitor, heavy chain 2                 | 7.92 ± 0.16        | 8.48 ± 0.06  | 8.26 ± 0.08  | 8.13 ± 0.06  | 0.93169              | 0.06695  | 0.00758 |
| TC1100002602.mm.1 | <a href="#">Itk</a>     | IL2 inducible T cell kinase                                  | 4.89 ± 0.04        | 5.48 ± 0.15  | 4.88 ± 0.07  | 5.21 ± 0.12  | 0.15463              | 0.00066  | 0.25816 |
| TSUnmapped000000: | <a href="#">Itlnb</a>   | intelectin b                                                 | 4.58 ± 0.03        | 4.77 ± 0.07  | 4.75 ± 0.02  | 4.9 ± 0.08   | 0.01321              | 0.00653  | 0.62673 |
| TC0100001707.mm.1 | <a href="#">Itpkb</a>   | inositol 1,4,5-trisphosphate 3-kinase B                      | 8.58 ± 0.05        | 8.71 ± 0.03  | 8.63 ± 0.02  | 8.79 ± 0.02  | 0.13769              | 0.00182  | 0.54338 |
| TC0600002296.mm.1 | <a href="#">Jazf1</a>   | JAZF zinc finger 1                                           | 6.87 ± 0.04        | 7.02 ± 0.05  | 7.02 ± 0.07  | 6.87 ± 0.05  | 0.92574              | 0.85221  | 0.00827 |
| TC0400003079.mm.1 | <a href="#">Jun</a>     | Jun oncogene                                                 | 8.79 ± 0.07        | 9.1 ± 0.11   | 9.44 ± 0.13  | 9.08 ± 0.09  | 0.01495              | 0.5743   | 0.00983 |
| TC0800000760.mm.1 | <a href="#">Jund</a>    | Jun proto-oncogene related gene d                            | 9.14 ± 0.06        | 9.36 ± 0.04  | 9.42 ± 0.05  | 9.22 ± 0.07  | 0.26397              | 0.91039  | 0.00368 |
| TC0600003295.mm.1 | <a href="#">Kap</a>     | kidney androgen regulated protein                            | 7.98 ± 1.12        | 3.58 ± 0.06  | 4.07 ± 0.27  | 3.54 ± 0.07  | 0.014                | 0.00364  | 0.01567 |
| TC0900000025.mm.1 | <a href="#">Kbtbd3</a>  | kelch repeat and BTB (POZ) domain containing 3               | 5.74 ± 0.04        | 5.8 ± 0.02   | 5.84 ± 0.04  | 5.65 ± 0.03  | 0.80648              | 0.16577  | 0.00154 |
| TC0600003163.mm.1 | <a href="#">Kcna1</a>   | potassium voltage-gated channel, shaker-related subfamily, r | 8.25 ± 0.3         | 7.33 ± 0.26  | 7.01 ± 0.17  | 7.95 ± 0.27  | 0.44866              | 0.69816  | 0.00844 |
| TC0600003164.mm.1 | <a href="#">Kcna6</a>   | potassium voltage-gated channel, shaker-related, subfamily,  | 6.05 ± 0.2         | 5.51 ± 0.07  | 5.27 ± 0.12  | 5.89 ± 0.09  | 0.33054              | 0.53599  | 0.0029  |
| TC0700000843.mm.1 | <a href="#">Kcna7</a>   | potassium voltage-gated channel, shaker-related subfamily, r | 5.18 ± 0.02        | 5.37 ± 0.07  | 5.17 ± 0.05  | 5.36 ± 0.07  | 0.78108              | 0.00371  | 0.92609 |
| TC0200004556.mm.1 | <a href="#">Kcniip3</a> | Kv channel interacting protein 3, calsenilin                 | 7.12 ± 0.06        | 7.08 ± 0.05  | 7.41 ± 0.06  | 7.21 ± 0.03  | 0.00099              | 0.06652  | 0.11873 |

Supplemental Table I

| Probe Set ID      | Symbol                  | Annotations<br>Description                                    | Summary Statistics |              |              |              | 2 way ANOVA p-values |          |         |
|-------------------|-------------------------|---------------------------------------------------------------|--------------------|--------------|--------------|--------------|----------------------|----------|---------|
|                   |                         |                                                               | XY sh              | XY Or        | XX sh        | XX Or        | XY vs XX             | Sh vs Or | Intrxn  |
| TC0100001611.mm.1 | <a href="#">Kcnj10</a>  | potassium inwardly-rectifying channel, subfamily J, member 1  | 5.69 ± 0.24        | 5.1 ± 0.13   | 4.99 ± 0.04  | 5.59 ± 0.1   | 0.72154              | 0.76301  | 0.00489 |
| TC1700002699.mm.1 | <a href="#">Kcnk12</a>  | potassium channel, subfamily K, member 12                     | 3.93 ± 0.07        | 4.18 ± 0.03  | 4.01 ± 0.04  | 4.27 ± 0.13  | 0.24863              | 0.00457  | 0.91402 |
| TC1200001416.mm.1 | <a href="#">Kcns3</a>   | potassium voltage-gated channel, delayed-rectifier, subfamily | 6.03 ± 0.03        | 6.24 ± 0.09  | 5.94 ± 0.05  | 6.21 ± 0.03  | 0.22226              | 0.00063  | 0.55823 |
| TC0500003060.mm.1 | <a href="#">Kctd10</a>  | potassium channel tetramerisation domain containing 10        | 8.65 ± 0.12        | 8.79 ± 0.04  | 8.92 ± 0.08  | 8.56 ± 0.09  | 0.63191              | 0.36666  | 0.00912 |
| TC0800002821.mm.1 | <a href="#">Kctd19</a>  | potassium channel tetramerisation domain containing 19        | 4.86 ± 0.02        | 5 ± 0.01     | 4.95 ± 0.02  | 5.06 ± 0.08  | 0.10608              | 0.00934  | 0.85319 |
| TC0900000639.mm.1 | <a href="#">Kdelc2</a>  | KDEL (Lys-Asp-Glu-Leu) containing 2                           | 8.26 ± 0.1         | 8.38 ± 0.05  | 8.45 ± 0.07  | 8.05 ± 0.1   | 0.59195              | 0.18911  | 0.00673 |
| TC0X00001541.mm.1 | <a href="#">Kdm5c</a>   | lysine (K)-specific demethylase 5C                            | 7.84 ± 0.03        | 7.82 ± 0.02  | 8.22 ± 0.02  | 8.17 ± 0.05  | 1.9E-07              | 0.22306  | 0.85326 |
| TC0Y00000005.mm.1 | <a href="#">Kdm5d</a>   | lysine (K)-specific demethylase 5D                            | 5.96 ± 0.05        | 5.77 ± 0.05  | 4.13 ± 0.04  | 4.08 ± 0.08  | 1.5E-13              | 0.05549  | 0.25922 |
| TC0X00000190.mm.1 | <a href="#">Kdm6a</a>   | lysine (K)-specific demethylase 6A                            | 7.36 ± 0.08        | 7.41 ± 0.06  | 8.01 ± 0.05  | 7.83 ± 0.12  | 1.8E-05              | 0.49639  | 0.1434  |
| TC0700001791.mm.1 | <a href="#">Kdm8</a>    | lysine (K)-specific demethylase 8                             | 6.01 ± 0.04        | 6.17 ± 0.02  | 6.27 ± 0.06  | 6.13 ± 0.03  | 0.03606              | 0.95457  | 0.00411 |
| TC0400004035.mm.1 | <a href="#">Kif1b</a>   | kinesin family member 1B                                      | 9.34 ± 0.19        | 8.9 ± 0.09   | 8.72 ± 0.09  | 9.2 ± 0.07   | 0.25931              | 0.8697   | 0.00376 |
| TC1500002071.mm.1 | <a href="#">Kif21a</a>  | kinesin family member 21A                                     | 7.76 ± 0.6         | 6.55 ± 0.24  | 5.97 ± 0.2   | 7.53 ± 0.23  | 0.44107              | 0.53269  | 0.00691 |
| TC0700003406.mm.1 | <a href="#">Klf13</a>   | Kruppel-like factor 13                                        | 7.88 ± 0.07        | 7.97 ± 0.06  | 7.77 ± 0.04  | 7.66 ± 0.08  | 0.00805              | 0.93046  | 0.1218  |
| TC0600001074.mm.1 | <a href="#">Klf15</a>   | Kruppel-like factor 15                                        | 7.82 ± 0.02        | 7.95 ± 0.03  | 7.78 ± 0.04  | 7.93 ± 0.06  | 0.63337              | 0.00255  | 0.86815 |
| TC1900000373.mm.1 | <a href="#">Klf9</a>    | Kruppel-like factor 9                                         | 10.79 ± 0.16       | 10.72 ± 0.07 | 10.31 ± 0.03 | 10.36 ± 0.06 | 0.00403              | 0.71576  | 0.90673 |
| TC1500000873.mm.1 | <a href="#">Klhdc7b</a> | kelch domain containing 7B                                    | 4.44 ± 0.05        | 4.67 ± 0.06  | 4.53 ± 0.06  | 4.66 ± 0.07  | 0.36566              | 0.00601  | 0.30358 |
| TC0X00001955.mm.1 | <a href="#">Klhl13</a>  | kelch-like 13                                                 | 6.76 ± 0.04        | 6.72 ± 0.05  | 6.94 ± 0.04  | 6.54 ± 0.11  | 0.89494              | 0.00591  | 0.01266 |
| TC0800002314.mm.1 | <a href="#">Klhl2</a>   | kelch-like 2, Mayven                                          | 7.28 ± 0.08        | 6.76 ± 0.12  | 6.81 ± 0.02  | 6.69 ± 0.06  | 0.00299              | 0.00097  | 0.02115 |
| TC0700001098.mm.1 | <a href="#">Klhl25</a>  | kelch-like 25                                                 | 6.85 ± 0.02        | 6.95 ± 0.02  | 7.05 ± 0.03  | 6.96 ± 0.03  | 0.00139              | 0.85437  | 0.00402 |
| TC0100000894.mm.1 | <a href="#">Klhl30</a>  | kelch-like 30                                                 | 6.15 ± 0.14        | 6.39 ± 0.02  | 6.61 ± 0.05  | 6.25 ± 0.04  | 0.12989              | 0.44129  | 0.00781 |
| TC0800001429.mm.1 | <a href="#">Klhl36</a>  | kelch-like 36                                                 | 6.58 ± 0.05        | 6.67 ± 0.03  | 6.84 ± 0.04  | 6.73 ± 0.06  | 0.00573              | 0.7731   | 0.07226 |
| TC0700000773.mm.1 | <a href="#">Klk10</a>   | kallikrein related-peptidase 10                               | 7.87 ± 0.23        | 7.35 ± 0.12  | 7.72 ± 0.05  | 7.11 ± 0.1   | 0.41906              | 0.00659  | 0.49824 |
| TC0700000771.mm.1 | <a href="#">Klk12</a>   | kallikrein related-peptidase 12                               | 5.54 ± 0.02        | 5.72 ± 0.06  | 5.66 ± 0.02  | 5.78 ± 0.07  | 0.07473              | 0.00821  | 0.5122  |
| TC1600000501.mm.1 | <a href="#">Kpna1</a>   | karyopherin (importin) alpha 1                                | 7.53 ± 0.04        | 7.47 ± 0.08  | 7.35 ± 0.03  | 7.3 ± 0.08   | 0.00927              | 0.27014  | 0.86279 |
| TC1700002723.mm.1 | <a href="#">Kpna2</a>   | karyopherin (importin) alpha 2                                | 7.34 ± 0.06        | 7.28 ± 0.05  | 6.81 ± 0.07  | 7.01 ± 0.04  | 8.9E-06              | 0.20219  | 0.0398  |
| TC1100002131.mm.1 | <a href="#">Kremen1</a> | kringle containing transmembrane protein 1                    | 7.14 ± 0.04        | 7.16 ± 0.03  | 7.39 ± 0.06  | 7.17 ± 0.02  | 0.00692              | 0.02373  | 0.01195 |
| TC1500001084.mm.1 | <a href="#">Krt18</a>   | keratin 18                                                    | 6.12 ± 0.06        | 6.53 ± 0.13  | 6.24 ± 0.06  | 6.35 ± 0.04  | 0.90702              | 0.00339  | 0.04443 |
| TC1500002278.mm.1 | <a href="#">Krt4</a>    | keratin 4                                                     | 4.4 ± 0.03         | 4.57 ± 0.03  | 4.5 ± 0.04   | 4.55 ± 0.04  | 0.19717              | 0.00673  | 0.05828 |
| TC1500002273.mm.1 | <a href="#">Krt73</a>   | keratin 73                                                    | 4.93 ± 0.03        | 5.14 ± 0.03  | 5.13 ± 0.06  | 5.05 ± 0.05  | 0.20014              | 0.17335  | 0.00565 |
| TC1500002261.mm.1 | <a href="#">Krt84</a>   | keratin 84                                                    | 4.72 ± 0.04        | 4.96 ± 0.05  | 4.82 ± 0.05  | 4.98 ± 0.1   | 0.40714              | 0.00882  | 0.61477 |
| TC1000001919.mm.1 | <a href="#">Lama2</a>   | laminin, alpha 2                                              | 8.59 ± 0.1         | 8.24 ± 0.02  | 8.35 ± 0.11  | 8.06 ± 0.11  | 0.07474              | 0.00873  | 0.98911 |
| TC1800000103.mm.1 | <a href="#">Lama3</a>   | laminin, alpha 3                                              | 5.89 ± 0.03        | 6.03 ± 0.04  | 6.04 ± 0.03  | 5.96 ± 0.04  | 0.24071              | 0.36788  | 0.00664 |



Supplemental Table I

| Probe Set ID      | Symbol                  | Annotations<br>Description                                    | Summary Statistics |              |              |              | 2 way ANOVA p-values |          |         |
|-------------------|-------------------------|---------------------------------------------------------------|--------------------|--------------|--------------|--------------|----------------------|----------|---------|
|                   |                         |                                                               | XY sh              | XY Or        | XX sh        | XX Or        | XY vs XX             | Sh vs Or | Intrxn  |
| TC1200000263.mm.1 | <a href="#">Lamb1</a>   | laminin B1                                                    | 8.12 ± 0.13        | 7.75 ± 0.1   | 7.52 ± 0.13  | 7.9 ± 0.03   | 0.06221              | 0.99381  | 0.0051  |
| TC0100003273.mm.1 | <a href="#">Lamc1</a>   | laminin, gamma 1                                              | 9.94 ± 0.05        | 9.72 ± 0.02  | 9.71 ± 0.04  | 9.45 ± 0.05  | 9.2E-05              | 0.00017  | 0.41181 |
| TC0200000559.mm.1 | <a href="#">Lamc3</a>   | laminin gamma 3                                               | 7.5 ± 0.08         | 7.6 ± 0.03   | 7.84 ± 0.1   | 7.52 ± 0.03  | 0.07783              | 0.10709  | 0.00823 |
| TC0800000123.mm.1 | <a href="#">Lamp1</a>   | lysosomal-associated membrane protein 1                       | 11.42 ± 0.01       | 11.34 ± 0.02 | 11.47 ± 0.03 | 11.32 ± 0.03 | 0.65344              | 0.0005   | 0.19311 |
| TC0X00000108.mm.1 | <a href="#">Lanc13</a>  | LanC lantibiotic synthetase component C-like 3 (bacterial)    | 8.24 ± 0.09        | 8.36 ± 0.07  | 8.58 ± 0.12  | 7.96 ± 0.17  | 0.8961               | 0.0765   | 0.00549 |
| TC0800002471.mm.1 | <a href="#">Large</a>   | like-glycosyltransferase                                      | 9.44 ± 0.15        | 9.16 ± 0.08  | 9.33 ± 0.06  | 8.82 ± 0.08  | 0.11958              | 0.00659  | 0.15594 |
| TC0700004273.mm.1 | <a href="#">Lat</a>     | linker for activation of T cells                              | 5.81 ± 0.02        | 6.25 ± 0.09  | 5.88 ± 0.06  | 6.28 ± 0.15  | 0.5711               | 0.00033  | 0.80851 |
| TC1700001147.mm.1 | <a href="#">Lbh</a>     | limb-bud and heart                                            | 9.58 ± 0.07        | 9.76 ± 0.07  | 9.89 ± 0.08  | 9.64 ± 0.07  | 0.1733               | 0.75079  | 0.00806 |
| TC0200002426.mm.1 | <a href="#">Lbp</a>     | lipopolysaccharide binding protein                            | 9.87 ± 0.12        | 8.99 ± 0.09  | 9.77 ± 0.04  | 8.93 ± 0.15  | 0.65143              | 4.4E-06  | 0.9333  |
| TC0900002766.mm.1 | <a href="#">Lca5</a>    | Leber congenital amaurosis 5 (human)                          | 5.84 ± 0.05        | 5.92 ± 0.04  | 5.95 ± 0.03  | 5.78 ± 0.04  | 0.91946              | 0.43674  | 0.00672 |
| TC0300002410.mm.1 | <a href="#">Lce1j</a>   | late cornified envelope 1J                                    | 4.45 ± 0.03        | 4.57 ± 0.05  | 4.5 ± 0.03   | 4.66 ± 0.07  | 0.13726              | 0.00957  | 0.73714 |
| TC0400003602.mm.1 | <a href="#">Lck</a>     | lymphocyte protein tyrosine kinase                            | 5.28 ± 0.04        | 5.72 ± 0.12  | 5.4 ± 0.06   | 5.73 ± 0.14  | 0.58896              | 0.00157  | 0.71768 |
| TC1800000714.mm.1 | <a href="#">Ldlrad4</a> | low density lipoprotein receptor class A domain containing 4  | 9.01 ± 0.13        | 9.37 ± 0.04  | 9.36 ± 0.09  | 9.02 ± 0.09  | 0.98596              | 0.91981  | 0.00378 |
| TC0300001330.mm.1 | <a href="#">Lef1</a>    | lymphoid enhancer binding factor 1                            | 4.95 ± 0.04        | 5.39 ± 0.11  | 4.91 ± 0.09  | 5.29 ± 0.14  | 0.43386              | 0.00106  | 0.78202 |
| TC0900001016.mm.1 | <a href="#">Leo1</a>    | Leo1, Paf1/RNA polymerase II complex component, homolog       | 7.31 ± 0.09        | 7.21 ± 0.11  | 7.84 ± 0.02  | 7.2 ± 0.07   | 0.01993              | 0.00026  | 0.01579 |
| TC0600003122.mm.1 | <a href="#">Leprel2</a> | leprecan-like 2                                               | 8.18 ± 0.09        | 8.37 ± 0.06  | 8.36 ± 0.06  | 8.15 ± 0.03  | 0.9708               | 0.87809  | 0.00688 |
| TC1900001051.mm.1 | <a href="#">Lgals12</a> | lectin, galactose binding, soluble 12                         | 10 ± 0.14          | 9.46 ± 0.2   | 9.31 ± 0.27  | 9.81 ± 0.03  | 0.24168              | 0.70543  | 0.00664 |
| TC1100002314.mm.1 | <a href="#">Lgalsl</a>  | lectin, galactoside binding-like                              | 9.38 ± 0.08        | 9.47 ± 0.04  | 9.6 ± 0.07   | 9.23 ± 0.05  | 0.93308              | 0.07905  | 0.00343 |
| TC0500002411.mm.1 | <a href="#">Lgi2</a>    | leucine-rich repeat LGI family, member 2                      | 8.43 ± 0.11        | 7.92 ± 0.05  | 8.2 ± 0.08   | 7.64 ± 0.17  | 0.07756              | 0.00069  | 0.61788 |
| TC0200001627.mm.1 | <a href="#">Lgr4</a>    | leucine-rich repeat-containing G protein-coupled receptor 4   | 7.57 ± 0.05        | 7.42 ± 0.02  | 7.28 ± 0.04  | 7.28 ± 0.1   | 0.00528              | 0.36879  | 0.33841 |
| TC1000003214.mm.1 | <a href="#">Lilrb4</a>  | leukocyte immunoglobulin-like receptor, subfamily B, member 4 | 7.26 ± 0.17        | 7 ± 0.21     | 6.77 ± 0.18  | 6.36 ± 0.11  | 0.00515              | 0.06195  | 0.74344 |
| TC1100003914.mm.1 | <a href="#">Limd2</a>   | LIM domain containing 2                                       | 7.2 ± 0.03         | 7.43 ± 0.04  | 7.33 ± 0.03  | 7.47 ± 0.05  | 0.07651              | 0.0006   | 0.36462 |
| TC0100001712.mm.1 | <a href="#">Lin9</a>    | lin-9 homolog (C. elegans)                                    | 5.34 ± 0.01        | 5.43 ± 0.02  | 5.25 ± 0.04  | 5.38 ± 0.05  | 0.05193              | 0.00633  | 0.5468  |
| TC0700002632.mm.1 | <a href="#">Lipe</a>    | lipase, hormone sensitive                                     | 9.31 ± 0.15        | 9.05 ± 0.19  | 8.84 ± 0.21  | 9.53 ± 0.08  | 0.71686              | 0.38423  | 0.00597 |
| TC1800001478.mm.1 | <a href="#">Lman1</a>   | lectin, mannose-binding, 1                                    | 8.23 ± 0.04        | 8.11 ± 0.04  | 8.11 ± 0.02  | 7.96 ± 0.06  | 0.00692              | 0.00649  | 0.86253 |
| TC0500003619.mm.1 | <a href="#">Lnx2</a>    | ligand of numb-protein X 2                                    | 8.21 ± 0.06        | 8.25 ± 0.02  | 8.52 ± 0.05  | 8.18 ± 0.05  | 0.0642               | 0.00403  | 0.00367 |
| TC0800002060.mm.1 | <a href="#">Lonrf1</a>  | LON peptidase N-terminal domain and ring finger 1             | 6.81 ± 0.07        | 7.11 ± 0.08  | 6.37 ± 0.1   | 6.85 ± 0.06  | 0.00131              | 0.00012  | 0.44383 |
| TC0X00000319.mm.1 | <a href="#">Lonrf3</a>  | LON peptidase N-terminal domain and ring finger 3             | 5.14 ± 0.03        | 5.28 ± 0.02  | 5.52 ± 0.08  | 5.16 ± 0.05  | 0.01836              | 0.03945  | 0.0002  |
| TC1800001334.mm.1 | <a href="#">Lox</a>     | lysyl oxidase                                                 | 9.89 ± 0.14        | 9.79 ± 0.07  | 10.11 ± 0.08 | 9.23 ± 0.14  | 0.18428              | 0.00109  | 0.00507 |
| TC0800000707.mm.1 | <a href="#">Lpl</a>     | lipoprotein lipase                                            | 10.97 ± 0.15       | 10.41 ± 0.23 | 10.09 ± 0.19 | 10.83 ± 0.04 | 0.12941              | 0.77281  | 0.00109 |
| TC1700002315.mm.1 | <a href="#">Lrg1</a>    | leucine-rich alpha-2-glycoprotein 1                           | 7.08 ± 0.05        | 6.47 ± 0.09  | 6.71 ± 0.07  | 6.66 ± 0.08  | 0.1923               | 0.00063  | 0.00179 |
| TC1900000882.mm.1 | <a href="#">Lrp5</a>    | low density lipoprotein receptor-related protein 5            | 8.77 ± 0.07        | 8.78 ± 0.02  | 9.02 ± 0.04  | 8.65 ± 0.04  | 0.30431              | 0.00393  | 0.00386 |

Supplemental Table I

| Probe Set ID      | Symbol                  | Annotations<br>Description                                            | Summary Statistics |              |              |              | 2 way ANOVA p-values |          |         |
|-------------------|-------------------------|-----------------------------------------------------------------------|--------------------|--------------|--------------|--------------|----------------------|----------|---------|
|                   |                         |                                                                       | XY sh              | XY Or        | XX sh        | XX Or        | XY vs XX             | Sh vs Or | Intrxn  |
| TC100000566.mm.1  | <a href="#">Lrrc20</a>  | leucine rich repeat containing 20                                     | 7.06 ± 0.06        | 7.04 ± 0.03  | 7.22 ± 0.03  | 7.34 ± 0.08  | 0.00216              | 0.6258   | 0.11564 |
| TC0700003434.mm.1 | <a href="#">Lrrk1</a>   | leucine-rich repeat kinase 1                                          | 7.32 ± 0.05        | 7.44 ± 0.04  | 7.47 ± 0.05  | 7.35 ± 0.02  | 0.39952              | 0.87213  | 0.00972 |
| TC0600001189.mm.1 | <a href="#">Lrrn1</a>   | leucine rich repeat protein 1, neuronal                               | 6.59 ± 0.05        | 6.37 ± 0.06  | 6.77 ± 0.03  | 6.41 ± 0.04  | 0.02445              | 3.6E-05  | 0.10229 |
| TC1700000673.mm.1 | <a href="#">Ltb</a>     | lymphotoxin B                                                         | 6.01 ± 0.05        | 6.4 ± 0.06   | 6.24 ± 0.09  | 6.49 ± 0.11  | 0.08402              | 0.00193  | 0.54763 |
| TC1900000082.mm.1 | <a href="#">Ltbp3</a>   | latent transforming growth factor beta binding protein 3              | 9.03 ± 0.08        | 9.28 ± 0.05  | 9.23 ± 0.05  | 9.06 ± 0.05  | 0.68859              | 0.6964   | 0.00874 |
| TC1700000410.mm.1 | <a href="#">Luc7l</a>   | Luc7 homolog (S. cerevisiae)-like                                     | 6.48 ± 0.02        | 6.48 ± 0.04  | 6.38 ± 0.02  | 6.39 ± 0.03  | 0.00639              | 0.91091  | 0.80574 |
| TC0400000811.mm.1 | <a href="#">Lurap1l</a> | leucine rich adaptor protein 1-like                                   | 6.13 ± 0.07        | 5.82 ± 0.03  | 5.99 ± 0.05  | 5.66 ± 0.07  | 0.02765              | 9.4E-05  | 0.87431 |
| TC1500001728.mm.1 | <a href="#">Ly6a</a>    | lymphocyte antigen 6 complex, locus A                                 | 11.12 ± 0.04       | 10.61 ± 0.06 | 10.95 ± 0.07 | 10.6 ± 0.08  | 0.21806              | 1.1E-05  | 0.32276 |
| TC1500001729.mm.1 | <a href="#">Ly6c1</a>   | lymphocyte antigen 6 complex, locus C1                                | 9.23 ± 0.03        | 8.75 ± 0.07  | 8.99 ± 0.06  | 8.81 ± 0.02  | 0.0976               | 1.4E-05  | 0.01178 |
| TC1500001730.mm.1 | <a href="#">Ly6c2</a>   | lymphocyte antigen 6 complex, locus C2                                | 10.65 ± 0.02       | 10.09 ± 0.09 | 10.4 ± 0.05  | 10.15 ± 0.04 | 0.13145              | 5.1E-06  | 0.01823 |
| TC1500001718.mm.1 | <a href="#">Ly6d</a>    | lymphocyte antigen 6 complex, locus D                                 | 5.82 ± 0.12        | 6.34 ± 0.09  | 6.2 ± 0.11   | 6.4 ± 0.11   | 0.08808              | 0.0081   | 0.21206 |
| TC1500001727.mm.1 | <a href="#">Ly6i</a>    | lymphocyte antigen 6 complex, locus I                                 | 6.19 ± 0.07        | 5.93 ± 0.06  | 6.08 ± 0.02  | 5.9 ± 0.05   | 0.33251              | 0.0029   | 0.59372 |
| TC0100000103.mm.1 | <a href="#">Ly96</a>    | lymphocyte antigen 96                                                 | 9.18 ± 0.08        | 8.9 ± 0.04   | 9.29 ± 0.1   | 9.03 ± 0.08  | 0.10994              | 0.00765  | 0.9507  |
| TC1200002166.mm.1 | <a href="#">Lysmd1</a>  | LysM, putative peptidoglycan-binding, domain containing 1             | 7.14 ± 0.02        | 7.05 ± 0.01  | 6.99 ± 0.05  | 6.93 ± 0.07  | 0.00817              | 0.15158  | 0.80427 |
| TC0700004104.mm.1 | <a href="#">Lyve1</a>   | lymphatic vessel endothelial hyaluronan receptor 1                    | 9.44 ± 0.12        | 8.85 ± 0.1   | 9.05 ± 0.09  | 8.68 ± 0.11  | 0.04932              | 0.00146  | 0.53167 |
| TC1000002930.mm.1 | <a href="#">Lyz1</a>    | lysozyme 1                                                            | 9.36 ± 0.04        | 9.12 ± 0.07  | 9.26 ± 0.09  | 8.75 ± 0.12  | 0.02063              | 0.00071  | 0.08057 |
| TC1000002929.mm.1 | <a href="#">Lyz2</a>    | lysozyme 2                                                            | 11.2 ± 0.06        | 10.99 ± 0.09 | 11.12 ± 0.08 | 10.59 ± 0.12 | 0.02634              | 0.00143  | 0.07479 |
| TC0800002359.mm.1 | <a href="#">Lzts1</a>   | leucine zipper, putative tumor suppressor 1                           | 4.94 ± 0.02        | 4.98 ± 0.01  | 4.97 ± 0     | 5.02 ± 0.03  | 0.0275               | 0.00881  | 0.9825  |
| TC0200005052.mm.1 | <a href="#">Mafk</a>    | v-maf musculoaponeurotic fibrosarcoma oncogene family, proto-oncogene | 7.6 ± 0.05         | 7.34 ± 0.05  | 7.41 ± 0.02  | 7.3 ± 0.06   | 0.07591              | 0.0044   | 0.29865 |
| TC0200004501.mm.1 | <a href="#">Mageb3</a>  | melanoma antigen, family B, 3                                         | 4.59 ± 0.04        | 4.71 ± 0.02  | 4.78 ± 0.04  | 4.65 ± 0.05  | 0.13668              | 0.83221  | 0.00887 |
| TC0600002763.mm.1 | <a href="#">Magi1</a>   | membrane associated guanylate kinase, WW and PDZ domain containing 1  | 7.39 ± 0.03        | 7.37 ± 0.02  | 7.56 ± 0.05  | 7.28 ± 0.04  | 0.22125              | 0.00237  | 0.00312 |
| TC0600003266.mm.1 | <a href="#">Magohb</a>  | mago-nashi homolog B (Drosophila)                                     | 5.15 ± 0.04        | 5.08 ± 0.06  | 5.24 ± 0.03  | 4.96 ± 0.07  | 0.76566              | 0.00616  | 0.07703 |
| TC0200004563.mm.1 | <a href="#">Mal</a>     | myelin and lymphocyte protein, T cell differentiation protein         | 7.89 ± 0.29        | 7.14 ± 0.15  | 6.95 ± 0.15  | 7.73 ± 0.19  | 0.72864              | 0.6227   | 0.00886 |
| TC1900000984.mm.1 | <a href="#">Malat1</a>  | metastasis associated lung adenocarcinoma transcript 1 (non-coding)   | 11.72 ± 0.1        | 11.53 ± 0.08 | 11.3 ± 0.05  | 11.4 ± 0.04  | 0.00432              | 0.64324  | 0.0908  |
| TC0200004564.mm.1 | <a href="#">Mall</a>    | mal, T cell differentiation protein-like                              | 8.31 ± 0.13        | 7.93 ± 0.04  | 7.96 ± 0.04  | 7.67 ± 0.08  | 0.00887              | 0.00513  | 0.95349 |
| TC0300001960.mm.1 | <a href="#">Maml3</a>   | mastermind like 3 (Drosophila)                                        | 6.28 ± 0.05        | 6.4 ± 0.01   | 6.4 ± 0.02   | 6.49 ± 0.04  | 0.01076              | 0.00837  | 0.68264 |
| TC1000002175.mm.1 | <a href="#">Man1a</a>   | mannosidase 1, alpha                                                  | 8.89 ± 0.05        | 8.5 ± 0.07   | 8.74 ± 0.03  | 8.53 ± 0.08  | 0.54517              | 0.00049  | 0.27389 |
| TC0400003742.mm.1 | <a href="#">Man1c1</a>  | mannosidase, alpha, class 1C, member 1                                | 8.74 ± 0.09        | 8.46 ± 0.02  | 8.67 ± 0.06  | 8.39 ± 0.07  | 0.73643              | 0.005    | 0.56334 |
| TC1700001062.mm.1 | <a href="#">Man2a1</a>  | mannosidase 2, alpha 1                                                | 9.6 ± 0.08         | 9.17 ± 0.11  | 9.37 ± 0.05  | 8.95 ± 0.11  | 0.04592              | 0.00062  | 0.69217 |
| TC0800000983.mm.1 | <a href="#">Man2b1</a>  | mannosidase 2, alpha B1                                               | 8.52 ± 0.04        | 8.4 ± 0.02   | 8.5 ± 0.03   | 8.19 ± 0.07  | 0.034                | 0.00042  | 0.03264 |
| TC0300001373.mm.1 | <a href="#">Manba</a>   | mannosidase, beta A, lysosomal                                        | 6.81 ± 0.04        | 6.84 ± 0.02  | 6.89 ± 0.05  | 6.67 ± 0.04  | 0.32005              | 0.02663  | 0.00673 |
| TC0600003305.mm.1 | <a href="#">Mansc1</a>  | MANSC domain containing 1                                             | 6.79 ± 0.03        | 6.8 ± 0.08   | 7.01 ± 0.05  | 6.9 ± 0.03   | 0.00774              | 0.43909  | 0.20647 |



Supplemental Table I

| Probe Set ID      | Symbol                   | Annotations<br>Description                                      | Summary Statistics |              |             |             | 2 way ANOVA p-values |          |         |
|-------------------|--------------------------|-----------------------------------------------------------------|--------------------|--------------|-------------|-------------|----------------------|----------|---------|
|                   |                          |                                                                 | XY sh              | XY Or        | XX sh       | XX Or       | XY vs XX             | Sh vs Or | Intrxn  |
| TC0X00001892.mm.1 | <a href="#">Maob</a>     | monoamine oxidase B                                             | 9.23 ± 0.16        | 8.75 ± 0.08  | 8.86 ± 0.04 | 9.08 ± 0.07 | 0.80875              | 0.2442   | 0.0066  |
| TC0200001809.mm.1 | <a href="#">Map1a</a>    | microtubule-associated protein 1 A                              | 7.47 ± 0.08        | 7.32 ± 0.02  | 7.57 ± 0.06 | 7.19 ± 0.08 | 0.80477              | 0.00675  | 0.04917 |
| TC1100000771.mm.1 | <a href="#">Map2k3</a>   | mitogen-activated protein kinase kinase 3                       | 8.23 ± 0.05        | 8.3 ± 0.02   | 8.15 ± 0.04 | 8.11 ± 0.06 | 0.00862              | 0.77482  | 0.277   |
| TC0400001607.mm.1 | <a href="#">Map3k6</a>   | mitogen-activated protein kinase kinase kinase 6                | 7.67 ± 0.15        | 7.44 ± 0.07  | 7.19 ± 0.02 | 7.05 ± 0.05 | 0.00154              | 0.17898  | 0.94339 |
| TC0700000519.mm.1 | <a href="#">Map4k1</a>   | mitogen-activated protein kinase kinase kinase kinase 1         | 5.97 ± 0.04        | 6.2 ± 0.03   | 6.1 ± 0.06  | 6.24 ± 0.07 | 0.11616              | 0.00277  | 0.46467 |
| TC0100000289.mm.1 | <a href="#">Map4k4</a>   | mitogen-activated protein kinase kinase kinase kinase 4         | 8.84 ± 0.04        | 8.68 ± 0.08  | 8.88 ± 0.02 | 8.64 ± 0.07 | 0.86755              | 0.00286  | 0.57534 |
| TC1500002038.mm.1 | <a href="#">Mapk12</a>   | mitogen-activated protein kinase 12                             | 6.87 ± 0.02        | 6.95 ± 0.03  | 6.83 ± 0.03 | 6.94 ± 0.04 | 0.57811              | 0.00723  | 0.74413 |
| TC0900002676.mm.1 | <a href="#">Mapk6</a>    | mitogen-activated protein kinase 6                              | 8.02 ± 0.06        | 7.73 ± 0.05  | 7.79 ± 0.05 | 7.63 ± 0.02 | 0.00487              | 0.00052  | 0.20031 |
| TC1000003095.mm.1 | <a href="#">Mar9</a>     | membrane-associated ring finger (C3HC4) 9                       | 5.68 ± 0.04        | 5.85 ± 0.04  | 5.84 ± 0.03 | 5.93 ± 0.04 | 0.0079               | 0.00362  | 0.26206 |
| TC0600002491.mm.1 | <a href="#">Mat2a</a>    | methionine adenosyltransferase II, alpha                        | 10.1 ± 0.03        | 10.09 ± 0.07 | 9.87 ± 0.06 | 9.95 ± 0.04 | 0.00184              | 0.52032  | 0.35324 |
| TC1100002548.mm.1 | <a href="#">Mat2b</a>    | methionine adenosyltransferase II, beta                         | 7.26 ± 0.03        | 7.34 ± 0.03  | 7.2 ± 0.02  | 7.29 ± 0.02 | 0.0592               | 0.00948  | 0.85972 |
| TC1600001439.mm.1 | <a href="#">Mb21d2</a>   | Mab-21 domain containing 2                                      | 7.13 ± 0.03        | 7.15 ± 0.08  | 7.31 ± 0.03 | 7.05 ± 0.06 | 0.35086              | 0.04439  | 0.00711 |
| TC1800000788.mm.1 | <a href="#">Mbd1</a>     | methyl-CpG binding domain protein 1                             | 7.92 ± 0.1         | 8.18 ± 0.13  | 7.6 ± 0.04  | 7.69 ± 0.07 | 0.00195              | 0.03326  | 0.20011 |
| TC1400001303.mm.1 | <a href="#">Mbnl2</a>    | muscleblind-like 2                                              | 8.93 ± 0.04        | 8.88 ± 0.02  | 8.79 ± 0.02 | 8.8 ± 0.05  | 0.00906              | 0.55952  | 0.47371 |
| TC1800000869.mm.1 | <a href="#">Mbp</a>      | myelin basic protein                                            | 7.36 ± 0.12        | 7.1 ± 0.08   | 6.98 ± 0.11 | 7.55 ± 0.13 | 0.53459              | 0.13103  | 0.00513 |
| TC1700002686.mm.1 | <a href="#">Mcf2</a>     | multiple coagulation factor deficiency 2                        | 7.94 ± 0.02        | 7.92 ± 0.01  | 7.9 ± 0.01  | 7.89 ± 0.01 | 0.00518              | 0.19404  | 0.41956 |
| TC0300001488.mm.1 | <a href="#">Mcoln3</a>   | mucolipin 3                                                     | 4.25 ± 0.03        | 4.48 ± 0.07  | 4.35 ± 0.02 | 4.4 ± 0.03  | 0.95425              | 0.00513  | 0.05959 |
| TC1500002206.mm.1 | <a href="#">Mcrs1</a>    | microspherule protein 1                                         | 7.27 ± 0.02        | 7.3 ± 0      | 7.35 ± 0.02 | 7.3 ± 0.01  | 0.00318              | 0.44875  | 0.00223 |
| TC0200004129.mm.1 | <a href="#">Mdk</a>      | midkine                                                         | 6.49 ± 0.04        | 6.83 ± 0.05  | 6.73 ± 0.05 | 6.8 ± 0.08  | 0.07092              | 0.00216  | 0.02837 |
| TC1700000900.mm.1 | <a href="#">Mea1</a>     | male enhanced antigen 1                                         | 7.43 ± 0.02        | 7.44 ± 0.04  | 7.51 ± 0.01 | 7.57 ± 0.04 | 0.00536              | 0.40085  | 0.32292 |
| TC1000002484.mm.1 | <a href="#">Med16</a>    | mediator complex subunit 16                                     | 7.9 ± 0.04         | 7.99 ± 0.03  | 8.11 ± 0.04 | 8.08 ± 0.02 | 0.00188              | 0.62135  | 0.16615 |
| TC0200003203.mm.1 | <a href="#">Med22</a>    | mediator complex subunit 22                                     | 7.19 ± 0.01        | 7.26 ± 0.03  | 7.26 ± 0.02 | 7.19 ± 0.01 | 0.92156              | 0.69557  | 0.0014  |
| TC1100003687.mm.1 | <a href="#">Med24</a>    | mediator complex subunit 24                                     | 7.33 ± 0.01        | 7.28 ± 0.03  | 7.47 ± 0.03 | 7.32 ± 0.02 | 0.00211              | 0.00046  | 0.05405 |
| TC0500000489.mm.1 | <a href="#">Med28</a>    | mediator of RNA polymerase II transcription, subunit 28 homolog | 7.19 ± 0.02        | 7.12 ± 0.04  | 7.23 ± 0.02 | 7.06 ± 0.04 | 0.79725              | 0.00069  | 0.09551 |
| TC0500003722.mm.1 | <a href="#">Medag</a>    | mesenteric estrogen dependent adipogenesis                      | 8.48 ± 0.07        | 8.26 ± 0.03  | 8.63 ± 0.07 | 8.05 ± 0.19 | 0.95988              | 0.00256  | 0.07072 |
| TC1200000331.mm.1 | <a href="#">Meox2</a>    | mesenchyme homeobox 2                                           | 7.09 ± 0.1         | 6.83 ± 0.04  | 7.24 ± 0.06 | 6.89 ± 0.11 | 0.34792              | 0.00249  | 0.80225 |
| TC0500003462.mm.1 | <a href="#">Mepce</a>    | methylphosphate capping enzyme                                  | 7.46 ± 0.03        | 7.56 ± 0.01  | 7.49 ± 0.03 | 7.54 ± 0.01 | 0.63792              | 0.00336  | 0.22003 |
| TC1000001544.mm.1 | <a href="#">Mettl1</a>   | methyltransferase like 1                                        | 6.87 ± 0.02        | 6.81 ± 0.01  | 6.76 ± 0.03 | 6.76 ± 0.02 | 0.0074               | 0.34078  | 0.49148 |
| TC1200001868.mm.1 | <a href="#">Mettl21d</a> | methyltransferase like 21D                                      | 5.6 ± 0.04         | 5.72 ± 0.03  | 5.77 ± 0.04 | 5.6 ± 0.03  | 0.61631              | 0.31866  | 0.00173 |
| TC1000000356.mm.1 | <a href="#">Mettl24</a>  | methyltransferase like 24                                       | 6.82 ± 0.08        | 7.18 ± 0.04  | 7.15 ± 0.02 | 6.99 ± 0.04 | 0.29442              | 0.1071   | 0.00057 |
| TC1500001040.mm.1 | <a href="#">Mettl7a1</a> | methyltransferase like 7A1                                      | 9.35 ± 0.06        | 9.1 ± 0.06   | 9.08 ± 0.03 | 9.28 ± 0.06 | 0.42692              | 0.76796  | 0.00128 |
| TC1100000780.mm.1 | <a href="#">Mfap4</a>    | microfibrillar-associated protein 4                             | 9.85 ± 0.16        | 10.24 ± 0.1  | 10.03 ± 0.1 | 9.69 ± 0.11 | 0.21708              | 0.70195  | 0.00844 |

Supplemental Table I

| Probe Set ID      | Symbol                       | Annotations<br>Description                                     | Summary Statistics |              |              |             | 2 way ANOVA p-values |          |         |
|-------------------|------------------------------|----------------------------------------------------------------|--------------------|--------------|--------------|-------------|----------------------|----------|---------|
|                   |                              |                                                                | XY sh              | XY Or        | XX sh        | XX Or       | XY vs XX             | Sh vs Or | Intrxn  |
| TC0700003552.mm.1 | <a href="#">Mfge8</a>        | milk fat globule-EGF factor 8 protein                          | 10.32 ± 0.12       | 10.43 ± 0.05 | 10.58 ± 0.08 | 10.2 ± 0.05 | 0.68782              | 0.21537  | 0.0088  |
| TC1600000421.mm.1 | <a href="#">Mfi2</a>         | antigen p97 (melanoma associated) identified by monoclonal     | 5.64 ± 0.02        | 5.76 ± 0.01  | 5.76 ± 0.04  | 5.94 ± 0.09 | 0.00717              | 0.00879  | 0.65658 |
| TC1500001093.mm.1 | <a href="#">Mfsd5</a>        | major facilitator superfamily domain containing 5              | 7.87 ± 0.03        | 7.85 ± 0.02  | 7.74 ± 0.02  | 7.78 ± 0.03 | 0.00324              | 0.64389  | 0.26207 |
| TC1100000874.mm.1 | <a href="#">Mfsd6l</a>       | major facilitator superfamily domain containing 6-like         | 5.08 ± 0.05        | 5.52 ± 0.11  | 5.31 ± 0.04  | 5.31 ± 0.07 | 0.89717              | 0.00864  | 0.00824 |
| TC1200000563.mm.1 | <a href="#">Mgat2</a>        | mannoside acetylglucosaminyltransferase 2                      | 8.59 ± 0.06        | 8.49 ± 0.05  | 8.47 ± 0.03  | 8.25 ± 0.04 | 0.00655              | 0.01732  | 0.19907 |
| TC1100000941.mm.1 | <a href="#">Mgl2</a>         | macrophage galactose N-acetyl-galactosamine specific lectin    | 7.8 ± 0.05         | 7.47 ± 0.09  | 7.55 ± 0.03  | 7.34 ± 0.04 | 0.00618              | 0.00038  | 0.42842 |
| TC0600001639.mm.1 | <a href="#">Mgst1</a>        | microsomal glutathione S-transferase 1                         | 8.16 ± 0.1         | 7.69 ± 0.16  | 7.59 ± 0.15  | 8.04 ± 0.05 | 0.27793              | 0.79379  | 0.00144 |
| TC0100003725.mm.1 | <a href="#">Mia3</a>         | melanoma inhibitory activity 3                                 | 8.28 ± 0.04        | 8.09 ± 0.04  | 8.11 ± 0.01  | 7.95 ± 0.09 | 0.01773              | 0.00901  | 0.97202 |
| TC1900000465.mm.1 | <a href="#">Minpp1</a>       | multiple inositol polyphosphate histidine phosphatase 1        | 8.05 ± 0.02        | 7.99 ± 0.02  | 7.93 ± 0     | 7.87 ± 0.07 | 0.00994              | 0.18429  | 0.73787 |
| TC1900001429.mm.1 | <a href="#">Mir107</a>       | microRNA 107                                                   | 4.24 ± 0.09        | 4.79 ± 0.14  | 4.36 ± 0.09  | 4.72 ± 0.06 | 0.8801               | 0.0012   | 0.58109 |
| TC1200002238.mm.1 | <a href="#">Mir1190</a>      | microRNA 1190                                                  | 6.72 ± 0.03        | 6.84 ± 0.03  | 6.7 ± 0.06   | 6.93 ± 0.08 | 0.57239              | 0.00842  | 0.29473 |
| TC0300002985.mm.1 | <a href="#">Mir1895</a>      | microRNA 1895                                                  | 4.75 ± 0.03        | 4.87 ± 0.02  | 4.78 ± 0.05  | 4.93 ± 0.07 | 0.22236              | 0.00852  | 0.86644 |
| TC0600003113.mm.1 | <a href="#">Mir200c</a>      | microRNA 200c                                                  | 3.99 ± 0.07        | 4.35 ± 0.06  | 4.09 ± 0.05  | 4.38 ± 0.14 | 0.64091              | 0.0047   | 0.90838 |
| TC0800002576.mm.1 | <a href="#">Mir3074-2</a>    | microRNA 3074-2                                                | 5.76 ± 0.03        | 5.79 ± 0.02  | 5.73 ± 0.01  | 5.91 ± 0.02 | 0.05494              | 0.00039  | 0.0151  |
| TC0500000388.mm.1 | <a href="#">Mir3097</a>      | microRNA 3097                                                  | 7.32 ± 0.05        | 7.46 ± 0.08  | 7.29 ± 0.04  | 7.49 ± 0.05 | 0.90146              | 0.00623  | 0.79623 |
| TC0400003027.mm.1 | <a href="#">Mir31</a>        | microRNA 31                                                    | 4.5 ± 0.02         | 4.47 ± 0.06  | 4.64 ± 0.08  | 4.72 ± 0.07 | 0.00674              | 0.74397  | 0.25533 |
| TC0800002936.mm.1 | <a href="#">Mir3473d</a>     | microRNA 3473d                                                 | 5.7 ± 0.05         | 5.82 ± 0.04  | 5.6 ± 0.05   | 5.81 ± 0.05 | 0.20233              | 0.00512  | 0.31008 |
| TC0100002595.mm.1 | <a href="#">Mir375</a>       | microRNA 375                                                   | 6.09 ± 0.07        | 6.68 ± 0.11  | 6.35 ± 0.12  | 6.61 ± 0.19 | 0.64602              | 0.00799  | 0.31676 |
| TC0X00002311.mm.1 | <a href="#">Mir505</a>       | microRNA 505                                                   | 4.75 ± 0.03        | 4.86 ± 0.08  | 4.6 ± 0.09   | 4.84 ± 0.02 | 0.24826              | 0.00968  | 0.37075 |
| TC1200001876.mm.1 | <a href="#">Mir681</a>       | microRNA 681                                                   | 6.29 ± 0.08        | 6.62 ± 0.03  | 6.43 ± 0.06  | 6.65 ± 0.11 | 0.57603              | 0.00874  | 0.8149  |
| TC1700001393.mm.1 | <a href="#">Mir692-1</a>     | microRNA 692-1                                                 | 9.59 ± 0.05        | 9.25 ± 0.08  | 9.54 ± 0.11  | 9.41 ± 0.07 | 0.47589              | 0.00976  | 0.20743 |
| TC1200001172.mm.1 | <a href="#">Mir758</a>       | microRNA 758                                                   | 5.54 ± 0.03        | 5.79 ± 0.07  | 5.62 ± 0.07  | 6 ± 0.17    | 0.16967              | 0.00603  | 0.43429 |
| TC1300001941.mm.1 | <a href="#">Mirllet7d</a>    | microRNA let7d                                                 | 6.13 ± 0.07        | 6.08 ± 0.03  | 5.97 ± 0.1   | 5.71 ± 0.12 | 0.00953              | 0.10048  | 0.24962 |
| TC1800000953.mm.1 | <a href="#">Mkx</a>          | mohawk homeobox                                                | 5.07 ± 0.06        | 5.18 ± 0.01  | 5.48 ± 0.11  | 5.17 ± 0.02 | 0.00619              | 0.15215  | 0.0039  |
| TC1900000444.mm.1 | <a href="#">Mlana</a>        | melan-A                                                        | 4.68 ± 0.04        | 5.05 ± 0.05  | 4.91 ± 0.05  | 5.01 ± 0.02 | 0.05724              | 0.00012  | 0.00878 |
| TC1100001543.mm.1 | <a href="#">Mllt6</a>        | myeloid/lymphoid or mixed-lineage leukemia (trithorax homolog) | 8.19 ± 0.03        | 8.31 ± 0.01  | 8.42 ± 0.04  | 8.34 ± 0.02 | 0.00059              | 0.44549  | 0.00506 |
| TC1400000745.mm.1 | <a href="#">Mmp14</a>        | matrix metalloproteinase 14 (membrane-inserted)                | 8.99 ± 0.07        | 8.95 ± 0.09  | 9.25 ± 0.06  | 8.67 ± 0.16 | 0.88727              | 0.00778  | 0.01799 |
| TC0200002542.mm.1 | <a href="#">Mmp9</a>         | matrix metalloproteinase 9                                     | 7.3 ± 0.06         | 7.06 ± 0.07  | 7.47 ± 0.03  | 7.16 ± 0.07 | 0.04815              | 0.00045  | 0.61666 |
| TC0X00001932.mm.1 | <a href="#">mmu-mir-5617</a> | mmu-mir-5617                                                   | 6.93 ± 0.03        | 7.19 ± 0.02  | 7.06 ± 0.06  | 7.26 ± 0.11 | 0.18951              | 0.00514  | 0.87671 |
| TC0500000874.mm.1 | <a href="#">mmu-mir-6415</a> | mmu-mir-6415                                                   | 5.58 ± 0.06        | 5.86 ± 0.03  | 5.7 ± 0.05   | 5.65 ± 0.05 | 0.40418              | 0.02972  | 0.00447 |
| TC1000002452.mm.1 | <a href="#">mmu-mir-6907</a> | mmu-mir-6907                                                   | 6.15 ± 0.02        | 6.38 ± 0.06  | 6.09 ± 0.06  | 6.39 ± 0.06 | 0.4941               | 0.00015  | 0.3882  |
| TC1900000115.mm.1 | <a href="#">mmu-mir-6989</a> | mmu-mir-6989                                                   | 8.8 ± 0.06         | 9.2 ± 0.03   | 8.92 ± 0.07  | 9.08 ± 0.16 | 0.95941              | 0.00781  | 0.20812 |

Supplemental Table I

| Probe Set ID      | Symbol                       | Annotations<br>Description                               | Summary Statistics |              |              |              | 2 way ANOVA p-values |          |         |
|-------------------|------------------------------|----------------------------------------------------------|--------------------|--------------|--------------|--------------|----------------------|----------|---------|
|                   |                              |                                                          | XY sh              | XY Or        | XX sh        | XX Or        | XY vs XX             | Sh vs Or | Intrxn  |
| TC0900001443.mm.1 | <a href="#">mmu-mir-7089</a> | mmu-mir-7089                                             | 6.7 ± 0.06         | 6.92 ± 0.06  | 6.79 ± 0.03  | 6.97 ± 0.1   | 0.27997              | 0.00847  | 0.65272 |
| TC1000002711.mm.1 | <a href="#">mmu-mir-7211</a> | mmu-mir-7211                                             | 6.97 ± 0.05        | 7.27 ± 0.03  | 7.17 ± 0.04  | 7.28 ± 0.08  | 0.08907              | 0.00239  | 0.12866 |
| TC0200001439.mm.1 | <a href="#">mmu-mir-7221</a> | mmu-mir-7221                                             | 5.47 ± 0.06        | 5.74 ± 0.05  | 5.5 ± 0.07   | 5.8 ± 0.11   | 0.35339              | 0.00104  | 0.90686 |
| TC0100003889.mm.1 | <a href="#">Mnda</a>         | myeloid cell nuclear differentiation antigen             | 7.46 ± 0.17        | 6.72 ± 0.12  | 6.86 ± 0.06  | 6.57 ± 0.13  | 0.02932              | 0.00364  | 0.19305 |
| TC1100001050.mm.1 | <a href="#">Mnt</a>          | max binding protein                                      | 7.6 ± 0.04         | 7.7 ± 0.02   | 7.62 ± 0.02  | 7.73 ± 0.02  | 0.18337              | 0.00071  | 0.80078 |
| TC0700004550.mm.1 | <a href="#">Mob2</a>         | MOB kinase activator 2                                   | 8.39 ± 0.14        | 8.36 ± 0.05  | 8.74 ± 0.09  | 8.09 ± 0.1   | 0.51841              | 0.01077  | 0.0068  |
| TC0X00003038.mm.1 | <a href="#">Morf4l2</a>      | mortality factor 4 like 2                                | 8.27 ± 0.06        | 8.17 ± 0.05  | 8.05 ± 0.03  | 7.87 ± 0.09  | 0.00335              | 0.11227  | 0.31342 |
| TC0X00002470.mm.1 | <a href="#">Mpp1</a>         | membrane protein, palmitoylated                          | 7.93 ± 0.05        | 7.61 ± 0.06  | 7.66 ± 0.04  | 7.55 ± 0.1   | 0.03147              | 0.00638  | 0.1496  |
| TC0600000591.mm.1 | <a href="#">Mpp6</a>         | membrane protein, palmitoylated 6 (MAGUK p55 subfamily m | 8.28 ± 0.12        | 7.89 ± 0.08  | 8.23 ± 0.03  | 7.73 ± 0.08  | 0.46741              | 0.00065  | 0.3166  |
| TC0100001578.mm.1 | <a href="#">Mpz</a>          | myelin protein zero                                      | 7.94 ± 0.29        | 7.08 ± 0.21  | 6.84 ± 0.27  | 8.09 ± 0.26  | 0.82096              | 0.27897  | 0.00371 |
| TC0200000245.mm.1 | <a href="#">Mrc1</a>         | mannose receptor, C type 1                               | 9.49 ± 0.06        | 8.93 ± 0.1   | 9.39 ± 0.08  | 8.9 ± 0.13   | 0.58119              | 0.00011  | 0.86326 |
| TC0700002080.mm.1 | <a href="#">Mrpl23</a>       | mitochondrial ribosomal protein L23                      | 7.33 ± 0.03        | 7.47 ± 0.02  | 7.49 ± 0.01  | 7.51 ± 0.03  | 0.00731              | 0.03978  | 0.14248 |
| TC1400000744.mm.1 | <a href="#">Mrpl52</a>       | mitochondrial ribosomal protein L52                      | 7.45 ± 0.04        | 7.51 ± 0.03  | 7.61 ± 0.03  | 7.64 ± 0.06  | 0.00612              | 0.40686  | 0.85056 |
| TC1900000216.mm.1 | <a href="#">Ms4a4a</a>       | membrane-spanning 4-domains, subfamily A, member 4A      | 7.36 ± 0.29        | 6.38 ± 0.11  | 6.25 ± 0.08  | 6 ± 0.05     | 0.00548              | 0.01962  | 0.20444 |
| TC1900000226.mm.1 | <a href="#">Ms4a4d</a>       | membrane-spanning 4-domains, subfamily A, member 4D      | 7.87 ± 0.09        | 7.71 ± 0.05  | 7.85 ± 0.09  | 7.31 ± 0.18  | 0.10557              | 0.00866  | 0.07713 |
| TC1900000225.mm.1 | <a href="#">Ms4a6b</a>       | membrane-spanning 4-domains, subfamily A, member 6B      | 5.68 ± 0.09        | 5.35 ± 0.04  | 5.28 ± 0.1   | 5.12 ± 0.08  | 0.004                | 0.01742  | 0.45682 |
| TC1900000221.mm.1 | <a href="#">Ms4a6c</a>       | membrane-spanning 4-domains, subfamily A, member 6C      | 7.52 ± 0.13        | 6.93 ± 0.09  | 6.94 ± 0.07  | 6.5 ± 0.14   | 0.00174              | 0.00143  | 0.78008 |
| TC1900001137.mm.1 | <a href="#">Ms4a6d</a>       | membrane-spanning 4-domains, subfamily A, member 6D      | 7.51 ± 0.15        | 6.93 ± 0.07  | 6.99 ± 0.07  | 6.59 ± 0.04  | 0.00342              | 0.00121  | 0.79426 |
| TC1900001131.mm.1 | <a href="#">Ms4a7</a>        | membrane-spanning 4-domains, subfamily A, member 7       | 5.25 ± 0.08        | 5 ± 0.07     | 5.06 ± 0.06  | 4.82 ± 0.06  | 0.02077              | 0.00464  | 0.93778 |
| TC0800002102.mm.1 | <a href="#">Msr1</a>         | macrophage scavenger receptor 1                          | 6.15 ± 0.11        | 5.72 ± 0.07  | 5.85 ± 0.07  | 5.58 ± 0.07  | 0.0614               | 0.00315  | 0.67744 |
| TC0500002275.mm.1 | <a href="#">Msx1</a>         | homeobox, msh-like 1                                     | 5.68 ± 0.01        | 5.79 ± 0.03  | 5.88 ± 0.03  | 5.95 ± 0.11  | 0.00725              | 0.12391  | 0.73849 |
| TC0800001095.mm.1 | <a href="#">Mt1</a>          | metallothionein 1                                        | 11.02 ± 0.09       | 10.69 ± 0.07 | 10.64 ± 0.03 | 10.47 ± 0.04 | 0.00078              | 0.00276  | 0.31021 |
| TC0800001094.mm.1 | <a href="#">Mt2</a>          | metallothionein 2                                        | 10.38 ± 0.18       | 9.51 ± 0.1   | 9.52 ± 0.04  | 9 ± 0.14     | 0.00054              | 0.0005   | 0.41966 |
| TC0X00002267.mm.1 | <a href="#">Mtap7d3</a>      | MAP7 domain containing 3                                 | 5.96 ± 0.07        | 5.72 ± 0.1   | 6.23 ± 0.12  | 5.71 ± 0.14  | 0.21186              | 0.004    | 0.19035 |
| TC1000000015.mm.1 | <a href="#">Mthfd1l</a>      | methylenetetrahydrofolate dehydrogenase (NADP+ depende   | 6.19 ± 0.1         | 6.29 ± 0.05  | 5.8 ± 0.03   | 6.23 ± 0.04  | 0.01974              | 0.00066  | 0.09013 |
| TC0600002565.mm.1 | <a href="#">Mthfd2</a>       | methylenetetrahydrofolate dehydrogenase (NAD+ dependent  | 6.94 ± 0.14        | 6.43 ± 0.1   | 6.79 ± 0.08  | 6.28 ± 0.05  | 0.3201               | 0.00065  | 0.73416 |
| TC0400001924.mm.1 | <a href="#">Mthfr</a>        | 5,10-methylenetetrahydrofolate reductase                 | 6.89 ± 0.05        | 7.03 ± 0.01  | 7.14 ± 0.04  | 7 ± 0.02     | 0.00742              | 0.77105  | 0.00163 |
| TC0700004547.mm.1 | <a href="#">Muc6</a>         | mucin 6, gastric                                         | 4.86 ± 0.02        | 5 ± 0.03     | 4.92 ± 0.02  | 5.04 ± 0.08  | 0.29583              | 0.00992  | 0.81454 |
| TC0X00001367.mm.1 | <a href="#">Mum1l1</a>       | melanoma associated antigen (mutated) 1-like 1           | 6.17 ± 0.08        | 6.18 ± 0.05  | 6.23 ± 0.06  | 5.8 ± 0.1    | 0.07715              | 0.02822  | 0.00878 |
| TC1400000316.mm.1 | <a href="#">Mustn1</a>       | musculoskeletal, embryonic nuclear protein 1             | 9.57 ± 0.12        | 9.68 ± 0.04  | 9.93 ± 0.07  | 9.32 ± 0.17  | 0.89619              | 0.06036  | 0.00567 |
| TC0700004660.mm.1 | <a href="#">Mvp</a>          | major vault protein                                      | 8.01 ± 0.02        | 8.04 ± 0.02  | 8.11 ± 0.02  | 8.03 ± 0.01  | 0.03924              | 0.12812  | 0.00616 |
| TC0400002095.mm.1 | <a href="#">Mxra8</a>        | matrix-remodelling associated 8                          | 8.6 ± 0.1          | 8.82 ± 0.04  | 8.88 ± 0.07  | 8.6 ± 0.05   | 0.58057              | 0.8133   | 0.00525 |

Supplemental Table I

| Probe Set ID      | Symbol                  | Annotations<br>Description                                   | Summary Statistics |              |              |              | 2 way ANOVA p-values |          |         |
|-------------------|-------------------------|--------------------------------------------------------------|--------------------|--------------|--------------|--------------|----------------------|----------|---------|
|                   |                         |                                                              | XY sh              | XY Or        | XX sh        | XX Or        | XY vs XX             | Sh vs Or | Intrxn  |
| TC1000001840.mm.1 | <a href="#">Myb</a>     | myeloblastosis oncogene                                      | 4.34 ± 0.04        | 5 ± 0.25     | 4.47 ± 0.01  | 5.17 ± 0.3   | 0.45723              | 0.00295  | 0.86369 |
| TC0700002966.mm.1 | <a href="#">Mybpc2</a>  | myosin binding protein C, fast-type                          | 5.48 ± 0.02        | 5.72 ± 0.02  | 5.62 ± 0.01  | 5.64 ± 0.09  | 0.47185              | 0.00743  | 0.02102 |
| TC1100000880.mm.1 | <a href="#">Myh10</a>   | myosin, heavy polypeptide 10, non-muscle                     | 9.9 ± 0.16         | 10.32 ± 0.07 | 10.3 ± 0.08  | 9.98 ± 0.12  | 0.76694              | 0.64463  | 0.00809 |
| TC1000003145.mm.1 | <a href="#">Myl6</a>    | myosin, light polypeptide 6, alkali, smooth muscle and non-m | 11.58 ± 0.06       | 11.77 ± 0.05 | 11.79 ± 0.04 | 11.58 ± 0.06 | 0.58487              | 0.9023   | 0.00204 |
| TC0200002303.mm.1 | <a href="#">Mylk2</a>   | myosin, light polypeptide kinase 2, skeletal muscle          | 6.66 ± 0.12        | 7.07 ± 0.07  | 6.98 ± 0.05  | 6.73 ± 0.06  | 0.78739              | 0.43136  | 0.00329 |
| TC0100002308.mm.1 | <a href="#">Myo1b</a>   | myosin IB                                                    | 6.95 ± 0.16        | 6.36 ± 0.09  | 6.34 ± 0.08  | 6.56 ± 0.03  | 0.10649              | 0.13608  | 0.00335 |
| TC0900001009.mm.1 | <a href="#">Myo5a</a>   | myosin VA                                                    | 8.15 ± 0.18        | 7.63 ± 0.09  | 7.65 ± 0.11  | 8.01 ± 0.07  | 0.59984              | 0.47364  | 0.00392 |
| TC0100001481.mm.1 | <a href="#">Myoc</a>    | myocilin                                                     | 5.96 ± 0.14        | 6.32 ± 0.13  | 6.51 ± 0.09  | 6.59 ± 0.07  | 0.00603              | 0.13481  | 0.38586 |
| TC0500003685.mm.1 | <a href="#">N4bp2l1</a> | NEDD4 binding protein 2-like 1                               | 5.83 ± 0.06        | 5.73 ± 0.07  | 5.61 ± 0.05  | 5.88 ± 0.03  | 0.40992              | 0.22501  | 0.00343 |
| TC1100001638.mm.1 | <a href="#">Naglu</a>   | alpha-N-acetylglucosaminidase (Sanfilippo disease IIIB)      | 7.4 ± 0.05         | 7.55 ± 0.03  | 7.56 ± 0.04  | 7.43 ± 0.01  | 0.45966              | 0.61872  | 0.00105 |
| TC1600001155.mm.1 | <a href="#">Nagpa</a>   | N-acetylglucosamine-1-phosphodiester alpha-N-acetylglucos    | 7.45 ± 0.04        | 7.54 ± 0.02  | 7.6 ± 0.03   | 7.49 ± 0.03  | 0.10225              | 0.75153  | 0.00593 |
| TC1300002530.mm.1 | <a href="#">Naip2</a>   | NLR family, apoptosis inhibitory protein 2                   | 6.01 ± 0.02        | 5.9 ± 0.05   | 6.02 ± 0.02  | 5.87 ± 0.04  | 0.69301              | 0.00214  | 0.66281 |
| TC0700000219.mm.1 | <a href="#">Napa</a>    | N-ethylmaleimide sensitive fusion protein attachment protein | 8.14 ± 0.05        | 8.04 ± 0.03  | 8.03 ± 0.04  | 8.15 ± 0.02  | 0.68696              | 0.95107  | 0.00931 |
| TC0200004813.mm.1 | <a href="#">Napb</a>    | N-ethylmaleimide sensitive fusion protein attachment protein | 8.4 ± 0.76         | 6.89 ± 0.33  | 6.05 ± 0.15  | 8 ± 0.32     | 0.38205              | 0.48424  | 0.0089  |
| TC1100002062.mm.1 | <a href="#">Narf</a>    | nuclear prelamin A recognition factor                        | 7.43 ± 0.07        | 7.51 ± 0.04  | 7.24 ± 0.05  | 7.29 ± 0.03  | 0.00277              | 0.22238  | 0.68258 |
| TC0700000049.mm.1 | <a href="#">Nat14</a>   | N-acetyltransferase 14                                       | 6.67 ± 0.08        | 6.8 ± 0.03   | 6.87 ± 0.01  | 6.67 ± 0.06  | 0.29986              | 0.88357  | 0.00523 |
| TC1200000110.mm.1 | <a href="#">Nbas</a>    | neuroblastoma amplified sequence                             | 7.58 ± 0.04        | 7.44 ± 0.01  | 7.4 ± 0.04   | 7.21 ± 0.09  | 0.00251              | 0.01091  | 0.5358  |
| TC1500000871.mm.1 | <a href="#">Ncaph2</a>  | non-SMC condensin II complex, subunit H2                     | 7.71 ± 0.01        | 7.75 ± 0.01  | 7.74 ± 0.01  | 7.71 ± 0.01  | 0.99107              | 0.48539  | 0.00302 |
| TC0200000549.mm.1 | <a href="#">Ncs1</a>    | neuronal calcium sensor 1                                    | 7.7 ± 0.09         | 7.51 ± 0.02  | 7.7 ± 0.08   | 7.37 ± 0.07  | 0.71105              | 0.00915  | 0.16762 |
| TC0X00001893.mm.1 | <a href="#">Ndp</a>     | Norrie disease (pseudoglioma) (human)                        | 5.35 ± 0.06        | 5.61 ± 0.11  | 5.96 ± 0.08  | 5.6 ± 0.12   | 0.0095               | 0.41203  | 0.00755 |
| TC0200005006.mm.1 | <a href="#">Ndrp3</a>   | N-myc downstream regulated gene 3                            | 8.58 ± 0.1         | 8.44 ± 0.06  | 8.44 ± 0.07  | 8.72 ± 0.06  | 0.71885              | 0.69133  | 0.00643 |
| TC0300002879.mm.1 | <a href="#">Ndst3</a>   | N-deacetylase/N-sulfotransferase (heparan glucosaminyl) 3    | 4.71 ± 0.02        | 4.88 ± 0.05  | 4.62 ± 0.02  | 4.77 ± 0.04  | 0.02074              | 0.00028  | 0.6207  |
| TC1900000986.mm.1 | <a href="#">Neat1</a>   | nuclear paraspeckle assembly transcript 1 (non-protein codin | 8.25 ± 0.12        | 8.07 ± 0.05  | 7.85 ± 0.02  | 8.1 ± 0.04   | 0.0172               | 0.9242   | 0.0084  |
| TC0400002238.mm.1 | <a href="#">Necab1</a>  | N-terminal EF-hand calcium binding protein 1                 | 6.88 ± 0.77        | 5.38 ± 0.23  | 4.78 ± 0.23  | 6.68 ± 0.32  | 0.62973              | 0.50723  | 0.00929 |
| TC1400000965.mm.1 | <a href="#">Nefl</a>    | neurofilament, light polypeptide                             | 7.89 ± 0.83        | 6.14 ± 0.56  | 5.21 ± 0.18  | 7.66 ± 0.31  | 0.47916              | 0.4087   | 0.00568 |
| TC1400002297.mm.1 | <a href="#">Nefm</a>    | neurofilament, medium polypeptide                            | 5.93 ± 0.24        | 5.6 ± 0.12   | 5.2 ± 0.07   | 6.03 ± 0.12  | 0.52602              | 0.10759  | 0.00787 |
| TC0200000702.mm.1 | <a href="#">Nek6</a>    | NIMA (never in mitosis gene a)-related expressed kinase 6    | 7.47 ± 0.06        | 7.35 ± 0.03  | 7.5 ± 0.02   | 7.34 ± 0.06  | 0.88295              | 0.008    | 0.90375 |
| TC0200002705.mm.1 | <a href="#">Nelfcd</a>  | negative elongation factor complex member C/D, Th11          | 7.02 ± 0.02        | 6.95 ± 0.03  | 6.92 ± 0.02  | 7.02 ± 0.02  | 0.51656              | 0.74218  | 0.00263 |
| TC0100003805.mm.1 | <a href="#">Nenf</a>    | neuron derived neurotrophic factor                           | 8.45 ± 0.05        | 8.63 ± 0.03  | 8.66 ± 0.03  | 8.55 ± 0     | 0.05006              | 0.17441  | 0.00036 |
| TC0100000817.mm.1 | <a href="#">Neu2</a>    | neuraminidase 2                                              | 5.07 ± 0.03        | 5.24 ± 0.05  | 5.31 ± 0.02  | 5.27 ± 0.03  | 0.00415              | 0.13016  | 0.02308 |
| TC0700003806.mm.1 | <a href="#">Neu3</a>    | neuraminidase 3                                              | 6.75 ± 0.06        | 7.01 ± 0.04  | 6.92 ± 0.03  | 6.9 ± 0.02   | 0.339                | 0.00797  | 0.0028  |
| TC1300002013.mm.1 | <a href="#">Nfil3</a>   | nuclear factor, interleukin 3, regulated                     | 6.41 ± 0.1         | 6.69 ± 0.02  | 7.08 ± 0.04  | 6.64 ± 0.11  | 0.00643              | 0.16682  | 0.00182 |

Supplemental Table I

| Probe Set ID      | Symbol                   | Annotations<br>Description                                   | Summary Statistics |              |             |             | 2 way ANOVA p-values |         |         |
|-------------------|--------------------------|--------------------------------------------------------------|--------------------|--------------|-------------|-------------|----------------------|---------|---------|
|                   |                          |                                                              | XY sh              | XY Or        | XX sh       | XX Or       | XY vs XX Sh          | vs Or   | Intrxn  |
| TC1900000689.mm.1 | <a href="#">Nfkb2</a>    | nuclear factor of kappa light polypeptide gene enhancer in B | 7.19 ± 0.03        | 7.27 ± 0.01  | 7.31 ± 0.01 | 7.2 ± 0.04  | 0.53624              | 0.34018 | 0.00553 |
| TC1200001768.mm.1 | <a href="#">Nfkbia</a>   | nuclear factor of kappa light polypeptide gene enhancer in B | 8.87 ± 0.06        | 9 ± 0.08     | 8.64 ± 0.06 | 8.71 ± 0.05 | 0.00262              | 0.06876 | 0.40644 |
| TC1600001742.mm.1 | <a href="#">Nfkbiz</a>   | nuclear factor of kappa light polypeptide gene enhancer in B | 6.33 ± 0.05        | 6.49 ± 0.05  | 6.45 ± 0.04 | 6.28 ± 0.04 | 0.25874              | 0.74862 | 0.00544 |
| TC1300000087.mm.1 | <a href="#">Nid1</a>     | nidogen 1                                                    | 10.18 ± 0.06       | 9.67 ± 0.06  | 9.98 ± 0.04 | 9.57 ± 0.09 | 0.05638              | 1.2E-05 | 0.53045 |
| TC1300002747.mm.1 | <a href="#">Nim1</a>     | serine/threonine-protein kinase NIM1                         | 5.49 ± 0.02        | 5.56 ± 0.01  | 5.48 ± 0.02 | 5.54 ± 0.01 | 0.3376               | 0.00326 | 0.84034 |
| TC1100000053.mm.1 | <a href="#">Nipsnap1</a> | 4-nitrophenylphosphatase domain and non-neuronal SNAP25      | 6.99 ± 0.09        | 6.88 ± 0.03  | 6.88 ± 0.05 | 7.17 ± 0.02 | 0.17857              | 0.2091  | 0.00389 |
| TC0200005426.mm.1 | <a href="#">Nkain4</a>   | Na+/K+ transporting ATPase interacting 4                     | 6.77 ± 0.03        | 6.75 ± 0.01  | 6.95 ± 0.03 | 6.83 ± 0.02 | 6.2E-05              | 0.01136 | 0.0287  |
| TC1300002304.mm.1 | <a href="#">Nkd2</a>     | naked cuticle 2 homolog (Drosophila)                         | 6.23 ± 0.03        | 6.25 ± 0.02  | 6.4 ± 0.05  | 6.26 ± 0.01 | 0.00876              | 0.10368 | 0.01208 |
| TC1400000972.mm.1 | <a href="#">Nkx3-1</a>   | NK-3 transcription factor, locus 1 (Drosophila)              | 7.82 ± 0.11        | 7.51 ± 0.07  | 7.96 ± 0.08 | 7.41 ± 0.18 | 0.55703              | 0.00616 | 0.18441 |
| TC0700004481.mm.1 | <a href="#">Nkx6-2</a>   | NK6 homeobox 2                                               | 6.4 ± 0.06         | 6.65 ± 0.05  | 6.51 ± 0.05 | 6.7 ± 0.09  | 0.21019              | 0.0043  | 0.62523 |
| TC0700000351.mm.1 | <a href="#">Nlrp5</a>    | NLR family, pyrin domain containing 5                        | 4.97 ± 0.03        | 4.89 ± 0.03  | 5.09 ± 0.06 | 4.98 ± 0.01 | 0.00534              | 0.04588 | 0.4307  |
| TC0900002239.mm.1 | <a href="#">Nnmt</a>     | nicotinamide N-methyltransferase                             | 6.59 ± 0.04        | 6.29 ± 0.07  | 6.34 ± 0.02 | 6.13 ± 0.1  | 0.00591              | 0.00172 | 0.51897 |
| TC0800002878.mm.1 | <a href="#">Nob1</a>     | NIN1/RPN12 binding protein 1 homolog (S. cerevisiae)         | 7.01 ± 0.02        | 7.14 ± 0.02  | 7.1 ± 0.01  | 7.07 ± 0.01 | 0.68004              | 0.02157 | 0.00198 |
| TC0600002323.mm.1 | <a href="#">Nod1</a>     | nucleotide-binding oligomerization domain containing 1       | 7.72 ± 0.04        | 7.56 ± 0.03  | 7.66 ± 0.01 | 7.58 ± 0.04 | 0.44307              | 0.00196 | 0.21114 |
| TC0600001448.mm.1 | <a href="#">Nop2</a>     | NOP2 nucleolar protein                                       | 7.75 ± 0.03        | 7.72 ± 0     | 7.67 ± 0.01 | 7.7 ± 0.01  | 0.00793              | 0.42448 | 0.06595 |
| TC0200001972.mm.1 | <a href="#">Nop56</a>    | NOP56 ribonucleoprotein                                      | 6.83 ± 0.02        | 6.83 ± 0.02  | 6.74 ± 0.02 | 6.71 ± 0.05 | 0.00392              | 0.73173 | 0.43004 |
| TC1700000348.mm.1 | <a href="#">Noxo1</a>    | NADPH oxidase organizer 1                                    | 5.34 ± 0.03        | 5.57 ± 0.04  | 5.54 ± 0.03 | 5.6 ± 0.04  | 0.01159              | 0.00268 | 0.04889 |
| TC0100000282.mm.1 | <a href="#">Npas2</a>    | neuronal PAS domain protein 2                                | 6.98 ± 0.29        | 7.07 ± 0.13  | 9.14 ± 0.11 | 7.07 ± 0.08 | 0.00024              | 8.5E-05 | 0.00023 |
| TC1800000994.mm.1 | <a href="#">Npc1</a>     | Niemann Pick type C1                                         | 7.91 ± 0.02        | 7.87 ± 0.02  | 7.78 ± 0.05 | 7.82 ± 0.02 | 0.00895              | 0.92599 | 0.12739 |
| TC0100003280.mm.1 | <a href="#">Npl</a>      | N-acetylneuraminatase pyruvate lyase                         | 6.24 ± 0.04        | 6.09 ± 0.07  | 6.13 ± 0.03 | 5.96 ± 0.06 | 0.04512              | 0.00962 | 0.90146 |
| TC1100004204.mm.1 | <a href="#">Nploc4</a>   | nuclear protein localization 4 homolog (S. cerevisiae)       | 9.38 ± 0.04        | 9.24 ± 0.05  | 9.18 ± 0.04 | 9.29 ± 0.03 | 0.04341              | 0.56159 | 0.00494 |
| TC1900001587.mm.1 | <a href="#">Npm3</a>     | nucleoplasm 3                                                | 7.93 ± 0.07        | 8.1 ± 0.04   | 8.01 ± 0.02 | 7.86 ± 0.02 | 0.09886              | 0.99472 | 0.00694 |
| TC0500001756.mm.1 | <a href="#">Nptx2</a>    | neuronal pentraxin 2                                         | 6.51 ± 0.07        | 6.72 ± 0.05  | 6.54 ± 0.07 | 6.73 ± 0.05 | 0.66393              | 0.0074  | 0.78523 |
| TC1700001635.mm.1 | <a href="#">Npw</a>      | neuropeptide W                                               | 6.48 ± 0.02        | 6.73 ± 0.07  | 6.51 ± 0.06 | 6.73 ± 0.12 | 0.86263              | 0.00644 | 0.86794 |
| TC0600000588.mm.1 | <a href="#">Npy</a>      | neuropeptide Y                                               | 9.91 ± 0.71        | 8.11 ± 0.62  | 6.53 ± 0.47 | 9.86 ± 0.26 | 0.28618              | 0.1306  | 0.00118 |
| TC1100003688.mm.1 | <a href="#">Nr1d1</a>    | nuclear receptor subfamily 1, group D, member 1              | 10.12 ± 0.12       | 10.03 ± 0.07 | 8.71 ± 0.26 | 10.06 ± 0.1 | 0.00112              | 0.00081 | 0.00073 |
| TC1400001499.mm.1 | <a href="#">Nr1d2</a>    | nuclear receptor subfamily 1, group D, member 2              | 9.86 ± 0.13        | 10.03 ± 0.03 | 8.31 ± 0.19 | 9.82 ± 0.02 | 1.2E-05              | 4.4E-06 | 0.0002  |
| TC0700002970.mm.1 | <a href="#">Nr1h2</a>    | nuclear receptor subfamily 1, group H, member 2              | 7.8 ± 0.03         | 7.85 ± 0.03  | 7.97 ± 0.02 | 7.91 ± 0.02 | 0.00061              | 0.89516 | 0.03751 |
| TC0800000854.mm.1 | <a href="#">Nr3c2</a>    | nuclear receptor subfamily 3, group C, member 2              | 7.05 ± 0.08        | 7.35 ± 0.06  | 7.51 ± 0.06 | 7.42 ± 0.05 | 0.00289              | 0.22671 | 0.0208  |
| TC0400000529.mm.1 | <a href="#">Nr4a3</a>    | nuclear receptor subfamily 4, group A, member 3              | 7.15 ± 0.18        | 7.04 ± 0.1   | 6.57 ± 0.14 | 6.48 ± 0.18 | 0.00631              | 0.76239 | 0.77171 |
| TC0X00001532.mm.1 | <a href="#">n-R5s14</a>  | nuclear encoded rRNA 5S 14                                   | 4.43 ± 0.04        | 4.75 ± 0.05  | 4.51 ± 0.03 | 4.76 ± 0.06 | 0.32211              | 3.5E-05 | 0.41713 |
| TC0700003632.mm.1 | <a href="#">n-R5s154</a> | nuclear encoded rRNA 5S 154                                  | 4.11 ± 0.01        | 4.31 ± 0.09  | 4.03 ± 0.05 | 4.32 ± 0.09 | 0.5261               | 0.00197 | 0.47731 |

Supplemental Table I

| Probe Set ID      | Symbol                   | Annotations<br>Description                                   | Summary Statistics |              |              |             | 2 way ANOVA p-values |          |         |
|-------------------|--------------------------|--------------------------------------------------------------|--------------------|--------------|--------------|-------------|----------------------|----------|---------|
|                   |                          |                                                              | XY sh              | XY Or        | XX sh        | XX Or       | XY vs XX             | Sh vs Or | Intrxn  |
| TC0500001554.mm.1 | <a href="#">n-R5s178</a> | nuclear encoded rRNA 5S 178                                  | 5.18 ± 0.03        | 5.3 ± 0.03   | 5.24 ± 0.05  | 5.52 ± 0.05 | 0.00371              | 0.0003   | 0.07566 |
| TC1500000680.mm.1 | <a href="#">n-R5s40</a>  | nuclear encoded rRNA 5S 40                                   | 4.05 ± 0.05        | 4.14 ± 0.08  | 3.8 ± 0.09   | 3.91 ± 0.06 | 0.00671              | 0.12397  | 0.89941 |
| TC1200001736.mm.1 | <a href="#">n-R5s58</a>  | nuclear encoded rRNA 5S 58                                   | 4.46 ± 0.04        | 4.58 ± 0.05  | 4.67 ± 0.03  | 4.64 ± 0.04 | 0.00543              | 0.29925  | 0.08397 |
| TC0900000789.mm.1 | <a href="#">n-R5s84</a>  | nuclear encoded rRNA 5S 84                                   | 4.1 ± 0.07         | 4.2 ± 0.06   | 4.03 ± 0.06  | 4.36 ± 0.09 | 0.28026              | 0.00365  | 0.24322 |
| TC0900000852.mm.1 | <a href="#">n-R5s85</a>  | nuclear encoded rRNA 5S 85                                   | 4.47 ± 0.08        | 4.95 ± 0.02  | 4.64 ± 0.05  | 4.53 ± 0.15 | 0.12317              | 0.08677  | 0.00886 |
| TC0900003133.mm.1 | <a href="#">n-R5s90</a>  | nuclear encoded rRNA 5S 90                                   | 6.21 ± 0.03        | 6.15 ± 0.01  | 6.18 ± 0.03  | 6.35 ± 0.03 | 0.0113               | 0.07669  | 0.00077 |
| TC0900002332.mm.1 | <a href="#">Nrg4</a>     | neuregulin 4                                                 | 7.48 ± 0.17        | 7.2 ± 0.2    | 6.81 ± 0.21  | 7.49 ± 0.11 | 0.15981              | 0.5057   | 0.00866 |
| TC1700002336.mm.1 | <a href="#">Nrtn</a>     | neurturin                                                    | 7.11 ± 0.04        | 7.33 ± 0.05  | 7.36 ± 0.04  | 7.41 ± 0.08 | 0.00535              | 0.01627  | 0.09297 |
| TC0900001128.mm.1 | <a href="#">Nt5e</a>     | 5 nucleotidase, ecto                                         | 7.01 ± 0.09        | 6.74 ± 0.1   | 7.01 ± 0.09  | 6.65 ± 0.08 | 0.88372              | 0.00802  | 0.43213 |
| TC0600003155.mm.1 | <a href="#">Ntf3</a>     | neurotrophin 3                                               | 6.85 ± 0.15        | 7.33 ± 0.05  | 7.42 ± 0.07  | 6.91 ± 0.1  | 0.60543              | 0.77995  | 0.00065 |
| TC1100003013.mm.1 | <a href="#">Ntn1</a>     | netrin 1                                                     | 9.56 ± 0.12        | 9.8 ± 0.04   | 9.9 ± 0.08   | 9.56 ± 0.07 | 0.4945               | 0.69704  | 0.00487 |
| TC0700001684.mm.1 | <a href="#">Nucb2</a>    | nucleobindin 2                                               | 8.87 ± 0.09        | 8.73 ± 0.02  | 8.93 ± 0.06  | 8.5 ± 0.12  | 0.54239              | 0.00902  | 0.04589 |
| TC1200002445.mm.1 | <a href="#">Nudt14</a>   | nudix (nucleoside diphosphate linked moiety X)-type motif 14 | 5.74 ± 0.03        | 5.75 ± 0.04  | 5.84 ± 0.02  | 5.94 ± 0.07 | 0.00657              | 0.29191  | 0.20322 |
| TC0900002988.mm.1 | <a href="#">Nudt16</a>   | nudix (nucleoside diphosphate linked moiety X)-type motif 16 | 6.93 ± 0.03        | 7.04 ± 0.04  | 7.09 ± 0.02  | 7.02 ± 0.02 | 0.0268               | 0.38124  | 0.00652 |
| TC0600002722.mm.1 | <a href="#">Nup210</a>   | nucleoporin 210                                              | 5.57 ± 0.06        | 5.81 ± 0.02  | 5.69 ± 0.06  | 5.84 ± 0.06 | 0.30249              | 0.00708  | 0.54832 |
| TC0700004152.mm.1 | <a href="#">Nup35</a>    | nucleoporin 35                                               | 6.78 ± 0.02        | 6.58 ± 0.03  | 6.8 ± 0.09   | 6.72 ± 0.03 | 0.13686              | 0.00794  | 0.17504 |
| TC1500000797.mm.1 | <a href="#">Nup50</a>    | nucleoporin 50                                               | 8.67 ± 0.02        | 8.62 ± 0.04  | 8.4 ± 0.03   | 8.5 ± 0.06  | 0.00031              | 0.5259   | 0.1046  |
| TC1100003117.mm.1 | <a href="#">Nup88</a>    | nucleoporin 88                                               | 6.16 ± 0.02        | 6.19 ± 0.04  | 6.09 ± 0.02  | 6.07 ± 0.04 | 0.00749              | 0.86698  | 0.44511 |
| TC0800001097.mm.1 | <a href="#">Nup93</a>    | nucleoporin 93                                               | 6.74 ± 0.03        | 6.7 ± 0.02   | 6.69 ± 0.01  | 6.6 ± 0.02  | 0.00961              | 0.03103  | 0.17765 |
| TC1000000469.mm.1 | <a href="#">Nus1</a>     | nuclear undecaprenyl pyrophosphate synthase 1 homolog (S     | 9.1 ± 0.04         | 9.05 ± 0.06  | 8.92 ± 0.02  | 8.89 ± 0.06 | 0.00329              | 0.36899  | 0.8073  |
| TC0800000831.mm.1 | <a href="#">Nwd1</a>     | NACHT and WD repeat domain containing 1                      | 5.58 ± 0.03        | 5.7 ± 0.02   | 5.65 ± 0.02  | 5.79 ± 0.06 | 0.07032              | 0.00419  | 0.8717  |
| TC0600000067.mm.1 | <a href="#">Nxph1</a>    | neurexophilin 1                                              | 5.64 ± 0.03        | 5.86 ± 0.08  | 5.87 ± 0.03  | 5.74 ± 0.06 | 0.30983              | 0.39765  | 0.00602 |
| TC0X00001402.mm.1 | <a href="#">Nxt2</a>     | nuclear transport factor 2-like export factor 2              | 7.1 ± 0.05         | 7.17 ± 0.01  | 7.3 ± 0.04   | 7.13 ± 0.04 | 0.057                | 0.27912  | 0.00642 |
| TC0700004409.mm.1 | <a href="#">Oat</a>      | ornithine aminotransferase                                   | 10.02 ± 0.09       | 10.27 ± 0.04 | 10.15 ± 0.06 | 9.86 ± 0.12 | 0.18255              | 0.91776  | 0.00543 |
| TC1200000142.mm.1 | <a href="#">Odc1</a>     | ornithine decarboxylase, structural 1                        | 9.07 ± 0.07        | 8.93 ± 0.04  | 8.82 ± 0.03  | 8.65 ± 0.07 | 0.00076              | 0.03188  | 0.58968 |
| TC1500000288.mm.1 | <a href="#">Odf1</a>     | outer dense fiber of sperm tails 1                           | 4.48 ± 0.06        | 4.75 ± 0.04  | 4.6 ± 0.02   | 4.55 ± 0.03 | 0.27077              | 0.02639  | 0.00412 |
| TC0300002629.mm.1 | <a href="#">Olfml3</a>   | olfactomedin-like 3                                          | 6.39 ± 0.04        | 6.29 ± 0.04  | 6.46 ± 0.03  | 6.31 ± 0.02 | 0.11173              | 0.00721  | 0.27656 |
| TC1100000517.mm.1 | <a href="#">Olf1381</a>  | olfactory receptor 1381                                      | 5.54 ± 0.02        | 5.82 ± 0.05  | 5.74 ± 0.02  | 5.67 ± 0.1  | 0.57334              | 0.07267  | 0.00488 |
| TC1900001145.mm.1 | <a href="#">Olf1417</a>  | olfactory receptor 1417                                      | 4.82 ± 0.02        | 5.11 ± 0.15  | 4.75 ± 0.04  | 5 ± 0.09    | 0.3289               | 0.00614  | 0.73848 |
| TC0800000811.mm.1 | <a href="#">Olf1373</a>  | olfactory receptor 373                                       | 4.6 ± 0.06         | 4.95 ± 0.09  | 4.67 ± 0.1   | 4.93 ± 0.09 | 0.99197              | 0.00611  | 0.83733 |
| TC0100001636.mm.1 | <a href="#">Olf1433</a>  | olfactory receptor 433                                       | 4.11 ± 0.06        | 4.33 ± 0.06  | 4.16 ± 0.04  | 4.39 ± 0.07 | 0.50014              | 0.00304  | 0.83735 |
| TC0700002005.mm.1 | <a href="#">Olf1523</a>  | olfactory receptor 523                                       | 5.37 ± 0.04        | 5.47 ± 0.05  | 5.6 ± 0.06   | 5.64 ± 0.08 | 0.00533              | 0.32053  | 0.69971 |



Supplemental Table I

| Probe Set ID      | Symbol                  | Annotations<br>Description                                     | Summary Statistics |             |             |             | 2 way ANOVA p-values |          |         |
|-------------------|-------------------------|----------------------------------------------------------------|--------------------|-------------|-------------|-------------|----------------------|----------|---------|
|                   |                         |                                                                | XY sh              | XY Or       | XX sh       | XX Or       | XY vs XX             | Sh vs Or | Intrxn  |
| TC0700001510.mm.1 | <a href="#">Olf632</a>  | olfactory receptor 632                                         | 5.14 ± 0.06        | 5.55 ± 0.06 | 5.36 ± 0.03 | 5.24 ± 0.14 | 0.64765              | 0.09664  | 0.0059  |
| TC0700001532.mm.1 | <a href="#">Olf661</a>  | olfactory receptor 661                                         | 4.1 ± 0.02         | 4.22 ± 0.06 | 4.14 ± 0.01 | 4.22 ± 0.02 | 0.42388              | 0.00974  | 0.51581 |
| TC0700003957.mm.1 | <a href="#">Olf666</a>  | olfactory receptor 666                                         | 4.16 ± 0.07        | 4.4 ± 0.1   | 4.12 ± 0.01 | 4.39 ± 0.09 | 0.57322              | 0.00681  | 0.71676 |
| TC0700003972.mm.1 | <a href="#">Olf686</a>  | olfactory receptor 686                                         | 5.17 ± 0.05        | 5.12 ± 0.05 | 5.24 ± 0.03 | 5.29 ± 0.04 | 0.00851              | 0.69952  | 0.44129 |
| TC0X00002689.mm.1 | <a href="#">Ophn1</a>   | oligophrenin 1                                                 | 6.73 ± 0.03        | 6.49 ± 0.07 | 6.61 ± 0.03 | 6.56 ± 0.05 | 0.40399              | 0.00372  | 0.0337  |
| TC0100003098.mm.1 | <a href="#">Optc</a>    | opticin                                                        | 6.18 ± 0.08        | 6.4 ± 0.05  | 6.37 ± 0.09 | 6.16 ± 0.05 | 0.90244              | 0.73686  | 0.00794 |
| TC1000003097.mm.1 | <a href="#">Os9</a>     | amplified in osteosarcoma                                      | 9.04 ± 0.03        | 8.93 ± 0.02 | 8.97 ± 0.02 | 8.89 ± 0.03 | 0.1702               | 0.00816  | 0.87725 |
| TC1900000237.mm.1 | <a href="#">Osbp</a>    | oxysterol binding protein                                      | 9.1 ± 0.03         | 9.17 ± 0.02 | 9.05 ± 0.04 | 8.97 ± 0.06 | 0.00731              | 0.88237  | 0.06112 |
| TC1600000464.mm.1 | <a href="#">Osbpl11</a> | oxysterol binding protein-like 11                              | 8.33 ± 0.03        | 8.22 ± 0.1  | 7.99 ± 0.09 | 8.19 ± 0.01 | 0.00917              | 0.61458  | 0.02495 |
| TC0600002250.mm.1 | <a href="#">Osbpl3</a>  | oxysterol binding protein-like 3                               | 7.58 ± 0.1         | 7.76 ± 0.05 | 7.74 ± 0.08 | 7.39 ± 0.09 | 0.33073              | 0.47228  | 0.0045  |
| TC1500001167.mm.1 | <a href="#">Osmr</a>    | oncostatin M receptor                                          | 8.69 ± 0.13        | 8.39 ± 0.06 | 8.5 ± 0.04  | 8.11 ± 0.1  | 0.05151              | 0.00562  | 0.4835  |
| TC0300002944.mm.1 | <a href="#">Ostc</a>    | oligosaccharyltransferase complex subunit                      | 8.88 ± 0.06        | 8.79 ± 0.05 | 8.81 ± 0.05 | 8.36 ± 0.14 | 0.01539              | 0.00936  | 0.02476 |
| TC0200000316.mm.1 | <a href="#">Otud1</a>   | OTU domain containing 1                                        | 7.84 ± 0.04        | 8.11 ± 0.08 | 8.2 ± 0.08  | 8 ± 0.05    | 0.06305              | 0.56899  | 0.0028  |
| TC0300000491.mm.1 | <a href="#">P2ry1</a>   | purinergic receptor P2Y, G-protein coupled 1                   | 6.38 ± 0.09        | 6.06 ± 0.1  | 6.38 ± 0.08 | 6.1 ± 0.05  | 0.88922              | 0.00125  | 0.52699 |
| TC0300002054.mm.1 | <a href="#">P2ry12</a>  | purinergic receptor P2Y, G-protein coupled 12                  | 5.93 ± 0.09        | 5.59 ± 0.05 | 6.04 ± 0.17 | 5.65 ± 0.1  | 0.43569              | 0.00464  | 0.7983  |
| TC0700003829.mm.1 | <a href="#">P2ry6</a>   | pyrimidinergic receptor P2Y, G-protein coupled, 6              | 7.93 ± 0.07        | 7.75 ± 0.04 | 7.95 ± 0.1  | 7.55 ± 0.08 | 0.37097              | 0.00319  | 0.09967 |
| TC1000000531.mm.1 | <a href="#">P4ha1</a>   | procollagen-proline, 2-oxoglutarate 4-dioxygenase (proline 4-  | 9.32 ± 0.22        | 9.02 ± 0.13 | 8.82 ± 0.07 | 8.51 ± 0.02 | 0.00968              | 0.12942  | 0.67289 |
| TC0700004225.mm.1 | <a href="#">Palb2</a>   | partner and localizer of BRCA2                                 | 4.57 ± 0.03        | 4.64 ± 0    | 4.65 ± 0    | 4.71 ± 0.03 | 0.00817              | 0.01541  | 0.82791 |
| TC0800002300.mm.1 | <a href="#">Palld</a>   | palladin, cytoskeletal associated protein                      | 6.99 ± 0.06        | 6.97 ± 0.01 | 7.31 ± 0.08 | 6.79 ± 0.06 | 0.19474              | 0.00061  | 0.00061 |
| TC0300002815.mm.1 | <a href="#">Palmd</a>   | palmdelphin                                                    | 8.25 ± 0.16        | 7.79 ± 0.1  | 7.69 ± 0.17 | 8.18 ± 0.04 | 0.41491              | 0.89052  | 0.00267 |
| TC0200001523.mm.1 | <a href="#">Pamr1</a>   | peptidase domain containing associated with muscle regener     | 7.31 ± 0.09        | 7.65 ± 0.05 | 7.47 ± 0.05 | 7.37 ± 0.05 | 0.65702              | 0.04993  | 0.00325 |
| TC1100000383.mm.1 | <a href="#">Pank3</a>   | pantothenate kinase 3                                          | 10.09 ± 0.15       | 9.63 ± 0.16 | 9.35 ± 0.13 | 9.83 ± 0.1  | 0.05648              | 0.95231  | 0.00348 |
| TC1900000467.mm.1 | <a href="#">Papss2</a>  | 3-phosphoadenosine 5-phosphosulfate synthase 2                 | 9.16 ± 0.09        | 8.87 ± 0.04 | 9.1 ± 0.06  | 8.77 ± 0.11 | 0.54784              | 0.00515  | 0.57667 |
| TC0900000750.mm.1 | <a href="#">Parp6</a>   | poly (ADP-ribose) polymerase family, member 6                  | 7.44 ± 0.11        | 7.21 ± 0.07 | 7.07 ± 0.09 | 7.41 ± 0.04 | 0.1857               | 0.75803  | 0.00304 |
| TC1500000787.mm.1 | <a href="#">Parvg</a>   | parvin, gamma                                                  | 5.74 ± 0.05        | 6 ± 0.01    | 5.83 ± 0.03 | 6.05 ± 0.07 | 0.2226               | 0.00027  | 0.84405 |
| TC1100000007.mm.1 | <a href="#">Patz1</a>   | POZ (BTB) and AT hook containing zinc finger 1                 | 5.89 ± 0.03        | 6 ± 0.02    | 5.93 ± 0.02 | 5.94 ± 0.01 | 0.83938              | 0.00977  | 0.01923 |
| TC1000001270.mm.1 | <a href="#">Pawr</a>    | PRKC, apoptosis, WT1, regulator                                | 8.6 ± 0.18         | 8.95 ± 0.06 | 9.1 ± 0.09  | 8.65 ± 0.07 | 0.39068              | 0.7408   | 0.00532 |
| TC0200002184.mm.1 | <a href="#">Pax1</a>    | paired box gene 1                                              | 6.52 ± 0.06        | 6.7 ± 0.02  | 6.82 ± 0.05 | 6.62 ± 0.05 | 0.03021              | 0.96329  | 0.00133 |
| TC0400002562.mm.1 | <a href="#">Pax5</a>    | paired box gene 5                                              | 5.56 ± 0.06        | 5.93 ± 0.06 | 5.81 ± 0.1  | 6 ± 0.07    | 0.08295              | 0.00438  | 0.39252 |
| TC0X00001054.mm.1 | <a href="#">Pbdc1</a>   | polysaccharide biosynthesis domain containing 1                | 5.54 ± 0.04        | 5.58 ± 0.07 | 5.88 ± 0.04 | 5.6 ± 0.03  | 0.00198              | 0.01317  | 0.00625 |
| TC1000000596.mm.1 | <a href="#">Pbld1</a>   | phenazine biosynthesis-like protein domain containing 1        | 5.16 ± 0.03        | 5.24 ± 0.01 | 5.15 ± 0.05 | 5.33 ± 0.05 | 0.37668              | 0.00954  | 0.21597 |
| TC0300000765.mm.1 | <a href="#">Pbxip1</a>  | pre B cell leukemia transcription factor interacting protein 1 | 9.36 ± 0.16        | 9.71 ± 0.08 | 9.72 ± 0.11 | 9.33 ± 0.09 | 0.91628              | 1        | 0.00655 |

Supplemental Table I

| Probe Set ID      | Symbol                  | Annotations<br>Description                                 | Summary Statistics |              |              |              | 2 way ANOVA p-values |          |         |
|-------------------|-------------------------|------------------------------------------------------------|--------------------|--------------|--------------|--------------|----------------------|----------|---------|
|                   |                         |                                                            | XY sh              | XY Or        | XX sh        | XX Or        | XY vs XX             | Sh vs Or | Intrxn  |
| TC0X00001178.mm.1 | <a href="#">Pcdh11x</a> | protocadherin 11 X-linked                                  | 5.16 ± 0.02        | 5.11 ± 0.03  | 5.28 ± 0.06  | 5.05 ± 0.05  | 0.46108              | 0.00797  | 0.03764 |
| TC1800000374.mm.1 | <a href="#">Pcdhb17</a> | protocadherin beta 17                                      | 6.41 ± 0.08        | 6.64 ± 0.05  | 6.74 ± 0.06  | 6.4 ± 0.12   | 0.55381              | 0.50882  | 0.00302 |
| TC1800000378.mm.1 | <a href="#">Pcdhb21</a> | protocadherin beta 21                                      | 5.22 ± 0.06        | 5.24 ± 0.03  | 5.28 ± 0.04  | 4.96 ± 0.04  | 0.02625              | 0.00513  | 0.00555 |
| TC0200002538.mm.1 | <a href="#">Pcif1</a>   | PDX1 C-terminal inhibiting factor 1                        | 7.58 ± 0.03        | 7.68 ± 0.02  | 7.79 ± 0.04  | 7.66 ± 0.01  | 0.00759              | 0.64572  | 0.00182 |
| TC0200002683.mm.1 | <a href="#">Pck1</a>    | phosphoenolpyruvate carboxykinase 1, cytosolic             | 10.86 ± 0.13       | 10.6 ± 0.2   | 9.86 ± 0.33  | 10.95 ± 0.05 | 0.08485              | 0.08466  | 0.0032  |
| TC1000002400.mm.1 | <a href="#">Pcnt</a>    | pericentrin (kendrin)                                      | 7.36 ± 0.05        | 7.48 ± 0.02  | 7.48 ± 0.03  | 7.38 ± 0.03  | 0.57741              | 0.586    | 0.00558 |
| TC0500003738.mm.1 | <a href="#">Pcolce</a>  | procollagen C-endopeptidase enhancer protein               | 8.29 ± 0.07        | 8.07 ± 0.04  | 8.24 ± 0.05  | 7.96 ± 0.03  | 0.37645              | 0.00116  | 0.24041 |
| TC1600002175.mm.1 | <a href="#">Pcp4</a>    | Purkinje cell protein 4                                    | 6.68 ± 0.09        | 6.72 ± 0.08  | 7.36 ± 0.16  | 6.76 ± 0.09  | 0.00574              | 0.01376  | 0.0129  |
| TC1900001219.mm.1 | <a href="#">Pcsk5</a>   | proprotein convertase subtilisin/kexin type 5              | 7.1 ± 0.07         | 7.31 ± 0.04  | 7.28 ± 0.03  | 7.06 ± 0.03  | 0.55417              | 0.91313  | 0.00097 |
| TC0900000839.mm.1 | <a href="#">Pdcd7</a>   | programmed cell death 7                                    | 6.48 ± 0.04        | 6.6 ± 0.02   | 6.7 ± 0.05   | 6.55 ± 0.03  | 0.04585              | 0.61686  | 0.00339 |
| TC0700004536.mm.1 | <a href="#">Pddc1</a>   | Parkinson disease 7 domain containing 1                    | 6.84 ± 0.02        | 6.82 ± 0.03  | 6.96 ± 0.02  | 6.88 ± 0.01  | 0.00149              | 0.02498  | 0.30345 |
| TC0700001669.mm.1 | <a href="#">Pde3b</a>   | phosphodiesterase 3B, cGMP-inhibited                       | 9.52 ± 0.13        | 9.09 ± 0.19  | 8.78 ± 0.19  | 9.36 ± 0.05  | 0.0824               | 0.82562  | 0.00288 |
| TC0500003482.mm.1 | <a href="#">Pdgfa</a>   | platelet derived growth factor, alpha                      | 8.13 ± 0.07        | 8.25 ± 0.04  | 8.24 ± 0.04  | 8.09 ± 0.03  | 0.99889              | 0.88148  | 0.00862 |
| TC0900000035.mm.1 | <a href="#">Pdgfd</a>   | platelet-derived growth factor, D polypeptide              | 9.65 ± 0.18        | 10.06 ± 0.08 | 10.08 ± 0.07 | 9.62 ± 0.14  | 0.99456              | 0.86929  | 0.0067  |
| TC0500000709.mm.1 | <a href="#">Pdgfra</a>  | platelet derived growth factor receptor, alpha polypeptide | 9.36 ± 0.07        | 9.21 ± 0.06  | 9.76 ± 0.08  | 9.09 ± 0.17  | 0.21264              | 0.0015   | 0.0279  |
| TC0200001812.mm.1 | <a href="#">Pdia3</a>   | protein disulfide isomerase associated 3                   | 10.99 ± 0.08       | 10.79 ± 0.04 | 10.87 ± 0.05 | 10.56 ± 0.09 | 0.05453              | 0.00599  | 0.21291 |
| TC0600002212.mm.1 | <a href="#">Pdia4</a>   | protein disulfide isomerase associated 4                   | 10.08 ± 0.11       | 9.76 ± 0.05  | 9.84 ± 0.07  | 9.37 ± 0.09  | 0.00773              | 0.00145  | 0.23192 |
| TC1600001548.mm.1 | <a href="#">Pdia5</a>   | protein disulfide isomerase associated 5                   | 7.75 ± 0.07        | 7.86 ± 0.05  | 7.9 ± 0.04   | 7.62 ± 0.06  | 0.5274               | 0.2414   | 0.00632 |
| TC1200000139.mm.1 | <a href="#">Pdia6</a>   | protein disulfide isomerase associated 6                   | 10.26 ± 0.08       | 9.99 ± 0.04  | 10.03 ± 0.06 | 9.69 ± 0.04  | 0.00158              | 0.00057  | 0.33204 |
| TC1900001484.mm.1 | <a href="#">Pdlim1</a>  | PDZ and LIM domain 1 (elfin)                               | 8.71 ± 0.16        | 8.94 ± 0.07  | 8.99 ± 0.08  | 8.53 ± 0.11  | 0.69679              | 0.41878  | 0.00918 |
| TC1400002333.mm.1 | <a href="#">Pdlim2</a>  | PDZ and LIM domain 2                                       | 7.01 ± 0.05        | 7.08 ± 0.01  | 7.23 ± 0.03  | 7.1 ± 0.01   | 0.00162              | 0.67046  | 0.00489 |
| TC1100002755.mm.1 | <a href="#">Pdlim4</a>  | PDZ and LIM domain 4                                       | 7.36 ± 0.04        | 7.48 ± 0.04  | 7.58 ± 0.04  | 7.45 ± 0.05  | 0.03468              | 0.9164   | 0.00941 |
| TC1000002453.mm.1 | <a href="#">Pdxk</a>    | pyridoxal (pyridoxine, vitamin B6) kinase                  | 7.88 ± 0.05        | 8.05 ± 0.05  | 7.87 ± 0.05  | 8.08 ± 0.05  | 0.86228              | 0.00664  | 0.40631 |
| TC0X00002435.mm.1 | <a href="#">Pdzd4</a>   | PDZ domain containing 4                                    | 6.18 ± 0.03        | 6.28 ± 0.03  | 6.27 ± 0.03  | 6.21 ± 0.01  | 0.50107              | 0.29984  | 0.00314 |
| TC1500000907.mm.1 | <a href="#">Pdzm4</a>   | PDZ domain containing RING finger 4                        | 5.43 ± 0.05        | 5.66 ± 0.03  | 5.76 ± 0.04  | 5.7 ± 0.07   | 0.00351              | 0.14865  | 0.01269 |
| TC0400002139.mm.1 | <a href="#">Penk</a>    | preproenkephalin                                           | 8.24 ± 0.11        | 7.39 ± 0.08  | 7.85 ± 0.03  | 7.48 ± 0.11  | 0.16689              | 2.2E-05  | 0.02878 |
| TC0700000647.mm.1 | <a href="#">Pepd</a>    | peptidase D                                                | 7.44 ± 0.05        | 7.26 ± 0.07  | 7.22 ± 0.04  | 7.34 ± 0.02  | 0.10541              | 0.34533  | 0.00529 |
| TC1100000900.mm.1 | <a href="#">Per1</a>    | period circadian clock 1                                   | 7.94 ± 0.12        | 8.38 ± 0.11  | 7.33 ± 0.09  | 8.14 ± 0.14  | 0.00603              | 6.5E-05  | 0.23696 |
| TC0100002801.mm.1 | <a href="#">Per2</a>    | period circadian clock 2                                   | 7.81 ± 0.13        | 8.39 ± 0.15  | 6.96 ± 0.06  | 7.92 ± 0.07  | 0.00017              | 6.8E-06  | 0.25702 |
| TC0400004074.mm.1 | <a href="#">Per3</a>    | period circadian clock 3                                   | 6.71 ± 0.09        | 6.95 ± 0.09  | 5.84 ± 0.05  | 6.86 ± 0.02  | 2.7E-05              | 6.8E-07  | 0.00022 |
| TC0500000843.mm.1 | <a href="#">Pf4</a>     | platelet factor 4                                          | 7.78 ± 0.04        | 7.47 ± 0.06  | 7.99 ± 0.1   | 7.6 ± 0.1    | 0.04862              | 0.0005   | 0.64598 |
| TC0X00001502.mm.1 | <a href="#">Pfkfb1</a>  | 6-phosphofructo-2-kinase/fructose-2,6-biphosphatase 1      | 6.3 ± 0.1          | 5.92 ± 0.12  | 5.82 ± 0.12  | 6.24 ± 0.03  | 0.29051              | 0.91558  | 0.001   |



Supplemental Table I

| Probe Set ID      | Symbol                  | Annotations<br>Description                                      | Summary Statistics |              |              |             | 2 way ANOVA p-values |          |         |
|-------------------|-------------------------|-----------------------------------------------------------------|--------------------|--------------|--------------|-------------|----------------------|----------|---------|
|                   |                         |                                                                 | XY sh              | XY Or        | XX sh        | XX Or       | XY vs XX             | Sh vs Or | Intrxn  |
| TC0200002961.mm.1 | <a href="#">Pfkfb3</a>  | 6-phosphofructo-2-kinase/fructose-2,6-biphosphatase 3           | 8.26 ± 0.15        | 8.26 ± 0.08  | 7.71 ± 0.14  | 8.42 ± 0.09 | 0.06034              | 0.04134  | 0.00544 |
| TC1300001395.mm.1 | <a href="#">Pfkp</a>    | phosphofructokinase, platelet                                   | 7.89 ± 0.07        | 7.65 ± 0.05  | 7.63 ± 0.04  | 7.72 ± 0.05 | 0.0888               | 0.1403   | 0.00738 |
| TC1200000032.mm.1 | <a href="#">Pfn4</a>    | profilin family, member 4                                       | 4.32 ± 0.03        | 4.34 ± 0.06  | 4.52 ± 0.04  | 4.5 ± 0.05  | 0.00143              | 0.98717  | 0.70652 |
| TC1700001846.mm.1 | <a href="#">Pglyrp2</a> | peptidoglycan recognition protein 2                             | 4.56 ± 0.04        | 4.76 ± 0.06  | 4.68 ± 0.02  | 4.86 ± 0.06 | 0.05791              | 0.00249  | 0.89251 |
| TC0900002779.mm.1 | <a href="#">Pgm3</a>    | phosphoglucomutase 3                                            | 6.75 ± 0.08        | 6.52 ± 0.09  | 6.75 ± 0.05  | 6.36 ± 0.08 | 0.45813              | 0.00238  | 0.24223 |
| TC1900001286.mm.1 | <a href="#">Pgm5</a>    | phosphoglucomutase 5                                            | 10.24 ± 0.16       | 10.52 ± 0.07 | 10.67 ± 0.11 | 10.15 ± 0.1 | 0.72981              | 0.41285  | 0.00564 |
| TC1700000426.mm.1 | <a href="#">Phf1</a>    | PHD finger protein 1                                            | 7.93 ± 0.02        | 8.03 ± 0.02  | 8.11 ± 0.02  | 8.13 ± 0.03 | 4.1E-05              | 0.02076  | 0.12694 |
| TC0200003354.mm.1 | <a href="#">Phf19</a>   | PHD finger protein 19                                           | 5.81 ± 0.03        | 5.99 ± 0.04  | 5.86 ± 0.01  | 5.87 ± 0.04 | 0.41193              | 0.00712  | 0.01188 |
| TC1100000935.mm.1 | <a href="#">Phf23</a>   | PHD finger protein 23                                           | 7.36 ± 0.01        | 7.48 ± 0.03  | 7.41 ± 0.03  | 7.45 ± 0.04 | 0.74338              | 0.00901  | 0.11283 |
| TC1000001301.mm.1 | <a href="#">Phlda1</a>  | pleckstrin homology-like domain, family A, member 1             | 7.37 ± 0.07        | 7.04 ± 0.09  | 7.47 ± 0.11  | 6.99 ± 0.08 | 0.65605              | 0.0005   | 0.32879 |
| TC0100000112.mm.1 | <a href="#">Pi15</a>    | peptidase inhibitor 15                                          | 10.13 ± 0.13       | 10.38 ± 0.05 | 10.48 ± 0.12 | 9.73 ± 0.2  | 0.32345              | 0.10298  | 0.00246 |
| TC1700000502.mm.1 | <a href="#">Pi16</a>    | peptidase inhibitor 16                                          | 8.35 ± 0.09        | 8.25 ± 0.06  | 8.61 ± 0.07  | 8.19 ± 0.04 | 0.15648              | 0.00359  | 0.03699 |
| TC0300000956.mm.1 | <a href="#">Pias3</a>   | protein inhibitor of activated STAT 3                           | 7.15 ± 0.03        | 7.22 ± 0.02  | 7.26 ± 0.02  | 7.19 ± 0.01 | 0.08516              | 0.85793  | 0.00695 |
| TC0100002690.mm.1 | <a href="#">Pid1</a>    | phosphotyrosine interaction domain containing 1                 | 6.41 ± 0.02        | 6.34 ± 0.02  | 6.49 ± 0.02  | 6.28 ± 0.04 | 0.653                | 0.00011  | 0.02515 |
| TC1600002118.mm.1 | <a href="#">Pigp</a>    | phosphatidylinositol glycan anchor biosynthesis, class P        | 7.15 ± 0.01        | 7.25 ± 0.01  | 7.24 ± 0.01  | 7.26 ± 0.02 | 0.00339              | 0.00159  | 0.01379 |
| TC0400003711.mm.1 | <a href="#">Pigv</a>    | phosphatidylinositol glycan anchor biosynthesis, class V        | 6.72 ± 0.02        | 6.88 ± 0.03  | 6.89 ± 0.04  | 6.8 ± 0.01  | 0.17328              | 0.45156  | 0.00064 |
| TC1300002553.mm.1 | <a href="#">Pik3r1</a>  | phosphatidylinositol 3-kinase, regulatory subunit, polypeptide  | 10.06 ± 0.05       | 9.81 ± 0.09  | 10.15 ± 0.06 | 9.66 ± 0.15 | 0.90452              | 0.00194  | 0.16602 |
| TC0400001250.mm.1 | <a href="#">Pik3r3</a>  | phosphatidylinositol 3 kinase, regulatory subunit, polypeptide  | 6.98 ± 0.04        | 6.81 ± 0.07  | 6.94 ± 0.08  | 6.6 ± 0.14  | 0.14666              | 0.00981  | 0.31662 |
| TC0700004634.mm.1 | <a href="#">Pira2</a>   | paired-Ig-like receptor A2                                      | 6.35 ± 0.05        | 6.23 ± 0.08  | 6.26 ± 0.03  | 6.03 ± 0.05 | 0.01516              | 0.00447  | 0.39421 |
| TC0700000030.mm.1 | <a href="#">Pira6</a>   | paired-Ig-like receptor A6                                      | 6.56 ± 0.03        | 6.39 ± 0.1   | 6.47 ± 0.04  | 6.24 ± 0.06 | 0.08071              | 0.00642  | 0.53527 |
| TC1100000845.mm.1 | <a href="#">Pirt</a>    | phosphoinositide-interacting regulator of transient receptor pc | 7.16 ± 0.77        | 5.77 ± 0.44  | 4.87 ± 0.09  | 7.15 ± 0.31 | 0.55963              | 0.29026  | 0.00664 |
| TC1100003948.mm.1 | <a href="#">Pitpnc1</a> | phosphatidylinositol transfer protein, cytoplasmic 1            | 6.83 ± 0.11        | 6.55 ± 0.05  | 6.43 ± 0.11  | 6.71 ± 0.03 | 0.14889              | 0.90019  | 0.00552 |
| TC1100003137.mm.1 | <a href="#">Pitpnm3</a> | PITPNM family member 3                                          | 6.57 ± 0.03        | 6.74 ± 0.03  | 6.79 ± 0.05  | 6.69 ± 0.01 | 0.02705              | 0.32435  | 0.00144 |
| TC1400002337.mm.1 | <a href="#">Piwil2</a>  | piwi-like RNA-mediated gene silencing 2                         | 5.07 ± 0.02        | 5.21 ± 0.04  | 5.13 ± 0.02  | 5.19 ± 0.04 | 0.37909              | 0.00314  | 0.11393 |
| TC1700001236.mm.1 | <a href="#">Pkdcc</a>   | protein kinase domain containing, cytoplasmic                   | 8.37 ± 0.11        | 8.53 ± 0.04  | 8.95 ± 0.11  | 8.31 ± 0.08 | 0.06495              | 0.02613  | 0.00069 |
| TC1600001604.mm.1 | <a href="#">Pla1a</a>   | phospholipase A1 member A                                       | 6.5 ± 0.07         | 6.24 ± 0.05  | 6.41 ± 0.07  | 6.27 ± 0.08 | 0.5331               | 0.00703  | 0.27008 |
| TC0400001733.mm.1 | <a href="#">Pla2g2d</a> | phospholipase A2, group IID                                     | 6.9 ± 0.09         | 6.95 ± 0.05  | 7.29 ± 0.06  | 7.31 ± 0.11 | 0.00105              | 0.84769  | 0.9119  |
| TC1700000835.mm.1 | <a href="#">Pla2g7</a>  | phospholipase A2, group VII (platelet-activating factor acetyl  | 7.82 ± 0.13        | 7.54 ± 0.16  | 7.4 ± 0.15   | 7.94 ± 0.13 | 0.60095              | 0.65282  | 0.00537 |
| TC1400001604.mm.1 | <a href="#">Plac9a</a>  | placenta specific 9a                                            | 9.74 ± 0.07        | 9.75 ± 0.04  | 9.98 ± 0.06  | 9.66 ± 0.06 | 0.11121              | 0.05442  | 0.00668 |
| TC1400001612.mm.1 | <a href="#">Plac9b</a>  | placenta specific 9b                                            | 9.24 ± 0.08        | 9.22 ± 0.04  | 9.49 ± 0.05  | 9.11 ± 0.08 | 0.1422               | 0.02273  | 0.00818 |
| TC1400000176.mm.1 | <a href="#">Plau</a>    | plasminogen activator, urokinase                                | 7.23 ± 0.08        | 6.81 ± 0.1   | 7.04 ± 0.05  | 6.69 ± 0.06 | 0.07178              | 0.00023  | 0.66668 |
| TC0200004418.mm.1 | <a href="#">Plcb2</a>   | phospholipase C, beta 2                                         | 5.39 ± 0.05        | 5.57 ± 0.02  | 5.48 ± 0.03  | 5.59 ± 0.05 | 0.25321              | 0.00483  | 0.51237 |

Supplemental Table I

| Probe Set ID      | Symbol                  | Annotations<br>Description                                   | Summary Statistics |              |              |              | 2 way ANOVA p-values |          |         |
|-------------------|-------------------------|--------------------------------------------------------------|--------------------|--------------|--------------|--------------|----------------------|----------|---------|
|                   |                         |                                                              | XY sh              | XY Or        | XX sh        | XX Or        | XY vs XX             | Sh vs Or | Intrxn  |
| TC0800001903.mm.1 | <a href="#">Plekha2</a> | pleckstrin homology domain-containing, family A (phosphoino  | 7.77 ± 0.05        | 7.85 ± 0.02  | 8.02 ± 0.05  | 7.71 ± 0.1   | 0.30262              | 0.12848  | 0.00554 |
| TC0700003823.mm.1 | <a href="#">Plekhb1</a> | pleckstrin homology domain containing, family B (evectins) m | 8.19 ± 0.19        | 7.73 ± 0.11  | 7.77 ± 0.07  | 8.37 ± 0.15  | 0.30401              | 0.42348  | 0.00731 |
| TC1200000682.mm.1 | <a href="#">Plekkg3</a> | pleckstrin homology domain containing, family G (with RhoGe  | 8.22 ± 0.16        | 8.5 ± 0.08   | 8.66 ± 0.09  | 8.14 ± 0.09  | 0.68858              | 0.35163  | 0.00473 |
| TC0400003888.mm.1 | <a href="#">Plekhn2</a> | pleckstrin homology domain containing, family M (with RUN c  | 7.71 ± 0.05        | 7.76 ± 0     | 7.87 ± 0.03  | 7.66 ± 0.05  | 0.44002              | 0.10493  | 0.0053  |
| TC0400004173.mm.1 | <a href="#">Plekhn1</a> | pleckstrin homology domain containing, family N member 1     | 5.26 ± 0.04        | 5.5 ± 0.03   | 5.37 ± 0.03  | 5.41 ± 0.05  | 0.72527              | 0.00314  | 0.01915 |
| TC0400004004.mm.1 | <a href="#">Plod1</a>   | procollagen-lysine, 2-oxoglutarate 5-dioxygenase 1           | 8.56 ± 0.05        | 8.35 ± 0.05  | 8.34 ± 0.02  | 8.21 ± 0.04  | 0.00244              | 0.00555  | 0.63825 |
| TC0X00001338.mm.1 | <a href="#">Plp1</a>    | proteolipid protein (myelin) 1                               | 8.51 ± 0.37        | 7.52 ± 0.15  | 7.37 ± 0.11  | 8.21 ± 0.19  | 0.65334              | 0.90188  | 0.008   |
| TC1500001934.mm.1 | <a href="#">Pmm1</a>    | phosphomannomutase 1                                         | 7.48 ± 0.09        | 7.44 ± 0.06  | 7.3 ± 0.05   | 7.64 ± 0.05  | 0.87065              | 0.09835  | 0.00729 |
| TC0X00002431.mm.1 | <a href="#">Pnck</a>    | pregnancy upregulated non-ubiquitously expressed CaM kin     | 7.57 ± 0.06        | 7.81 ± 0.05  | 7.84 ± 0.05  | 7.7 ± 0.02   | 0.07922              | 0.22648  | 0.00122 |
| TC1400000574.mm.1 | <a href="#">Pnp</a>     | purine-nucleoside phosphorylase                              | 8.23 ± 0.06        | 7.98 ± 0.07  | 7.81 ± 0.03  | 8.03 ± 0.03  | 0.00267              | 0.64974  | 0.00037 |
| TC1400000575.mm.1 | <a href="#">Pnp2</a>    | purine-nucleoside phosphorylase 2                            | 8.49 ± 0.05        | 8.28 ± 0.06  | 8.1 ± 0.06   | 8.32 ± 0.03  | 0.00483              | 0.99929  | 0.00117 |
| TC0700002053.mm.1 | <a href="#">Pnpla2</a>  | patatin-like phospholipase domain containing 2               | 10.96 ± 0.14       | 10.59 ± 0.17 | 10.28 ± 0.24 | 11.07 ± 0.06 | 0.35087              | 0.38702  | 0.00205 |
| TC0800000011.mm.1 | <a href="#">Pnpla6</a>  | patatin-like phospholipase domain containing 6               | 7.14 ± 0.05        | 6.98 ± 0.02  | 6.95 ± 0.04  | 7.07 ± 0.02  | 0.26183              | 0.61356  | 0.00382 |
| TC0400002373.mm.1 | <a href="#">Pnrc1</a>   | proline-rich nuclear receptor coactivator 1                  | 8.17 ± 0.05        | 8.38 ± 0.05  | 8.49 ± 0.03  | 8.34 ± 0.02  | 0.00347              | 0.41314  | 0.00039 |
| TC1000001203.mm.1 | <a href="#">Poc1b</a>   | POC1 centriolar protein homolog B (Chlamydomonas)            | 7.29 ± 0.04        | 7.38 ± 0.01  | 7.52 ± 0.04  | 7.3 ± 0.07   | 0.10703              | 0.15262  | 0.00439 |
| TC0400004216.mm.1 | <a href="#">Podn</a>    | podocan                                                      | 9.2 ± 0.06         | 8.95 ± 0.07  | 9.33 ± 0.06  | 8.82 ± 0.1   | 0.85862              | 0.00032  | 0.06152 |
| TC1100002155.mm.1 | <a href="#">Pold2</a>   | polymerase (DNA directed), delta 2, regulatory subunit       | 7.49 ± 0.02        | 7.61 ± 0.01  | 7.68 ± 0.03  | 7.66 ± 0.03  | 0.00069              | 0.11333  | 0.0399  |
| TC1900000036.mm.1 | <a href="#">Pold4</a>   | polymerase (DNA-directed), delta 4                           | 7.73 ± 0.05        | 7.91 ± 0.03  | 8.15 ± 0.07  | 7.97 ± 0.02  | 0.0003               | 0.78661  | 0.0033  |
| TC0600000839.mm.1 | <a href="#">Polr1a</a>  | polymerase (RNA) I polypeptide A                             | 7.02 ± 0.03        | 6.9 ± 0.04   | 7.01 ± 0.03  | 6.84 ± 0.05  | 0.25843              | 0.00192  | 0.66242 |
| TC1000002488.mm.1 | <a href="#">Polr2e</a>  | polymerase (RNA) II (DNA directed) polypeptide E             | 7.41 ± 0.03        | 7.42 ± 0.02  | 7.49 ± 0.03  | 7.58 ± 0.03  | 0.00328              | 0.20315  | 0.11538 |
| TC1500000667.mm.1 | <a href="#">Polr2f</a>  | polymerase (RNA) II (DNA directed) polypeptide F             | 8.98 ± 0.03        | 9.02 ± 0.01  | 9.15 ± 0.06  | 9.09 ± 0.03  | 0.00547              | 0.71198  | 0.22767 |
| TC0700004542.mm.1 | <a href="#">Polr2l</a>  | polymerase (RNA) II (DNA directed) polypeptide L             | 6.8 ± 0.03         | 6.8 ± 0.05   | 6.62 ± 0.05  | 6.75 ± 0.03  | 0.00784              | 0.18358  | 0.07336 |
| TC0600001805.mm.1 | <a href="#">Pon1</a>    | paraoxonase 1                                                | 8.69 ± 0.16        | 7.16 ± 0.23  | 7.85 ± 0.16  | 7.41 ± 0.1   | 0.08124              | 4.8E-05  | 0.00498 |
| TC0700002880.mm.1 | <a href="#">Pop4</a>    | processing of precursor 4, ribonuclease P/MRP family, (S. ce | 8.18 ± 0.06        | 8.02 ± 0.04  | 7.94 ± 0.04  | 7.86 ± 0.1   | 0.00591              | 0.05664  | 0.48991 |
| TC0500001584.mm.1 | <a href="#">Por</a>     | P450 (cytochrome) oxidoreductase                             | 9.09 ± 0.04        | 8.94 ± 0.09  | 8.48 ± 0.07  | 8.94 ± 0.03  | 0.00022              | 0.02647  | 0.00021 |
| TC0900000615.mm.1 | <a href="#">Pou2af1</a> | POU domain, class 2, associating factor 1                    | 5.62 ± 0.05        | 5.97 ± 0.1   | 5.89 ± 0.1   | 6.19 ± 0.1   | 0.01728              | 0.00279  | 0.87828 |
| TC1000000571.mm.1 | <a href="#">Ppa1</a>    | pyrophosphatase (inorganic) 1                                | 9.05 ± 0.19        | 8.36 ± 0.16  | 8.16 ± 0.13  | 8.6 ± 0.05   | 0.04446              | 0.37371  | 0.00229 |
| TC1300001270.mm.1 | <a href="#">Ppap2a</a>  | phosphatidic acid phosphatase type 2A                        | 9.71 ± 0.1         | 9.48 ± 0.09  | 9.64 ± 0.06  | 9.13 ± 0.14  | 0.09858              | 0.0048   | 0.1116  |
| TC0400001091.mm.1 | <a href="#">Ppap2b</a>  | phosphatidic acid phosphatase type 2B                        | 10.51 ± 0.07       | 10.14 ± 0.05 | 10.56 ± 0.05 | 9.98 ± 0.14  | 0.57717              | 8.1E-05  | 0.15833 |
| TC1800001338.mm.1 | <a href="#">Ppic</a>    | peptidylprolyl isomerase C                                   | 9.29 ± 0.09        | 9.21 ± 0.08  | 9.04 ± 0.04  | 8.74 ± 0.12  | 0.0023               | 0.07059  | 0.18438 |
| TC1700001781.mm.1 | <a href="#">Ppil1</a>   | peptidylprolyl isomerase (cyclophilin)-like 1                | 7.09 ± 0.03        | 7.21 ± 0.01  | 7.2 ± 0.01   | 7.17 ± 0.01  | 0.24179              | 0.10196  | 0.00562 |
| TC1600001154.mm.1 | <a href="#">Ppl</a>     | periplakin                                                   | 7.71 ± 0.05        | 7.58 ± 0.03  | 7.53 ± 0.06  | 7.39 ± 0.05  | 0.00822              | 0.04757  | 0.57435 |

Supplemental Table I

| Probe Set ID      | Symbol                  | Annotations<br>Description                                  | Summary Statistics |              |             |             | 2 way ANOVA p-values |          |         |
|-------------------|-------------------------|-------------------------------------------------------------|--------------------|--------------|-------------|-------------|----------------------|----------|---------|
|                   |                         |                                                             | XY sh              | XY Or        | XX sh       | XX Or       | XY vs XX             | Sh vs Or | Intrxn  |
| TC0900003003.mm.1 | <a href="#">Ppm1m</a>   | protein phosphatase 1M                                      | 8.33 ± 0.07        | 8.21 ± 0.06  | 8.22 ± 0.04 | 8.39 ± 0.02 | 0.94093              | 0.84459  | 0.00813 |
| TC0700003818.mm.1 | <a href="#">Ppme1</a>   | protein phosphatase methylesterase 1                        | 8.65 ± 0.08        | 8.53 ± 0.05  | 8.3 ± 0.04  | 8.22 ± 0.09 | 0.00084              | 0.30422  | 0.86568 |
| TC1700001075.mm.1 | <a href="#">Ppp4r1</a>  | protein phosphatase 4, regulatory subunit 1                 | 7.96 ± 0.05        | 7.97 ± 0.03  | 7.9 ± 0.02  | 7.83 ± 0.03 | 0.00874              | 0.25808  | 0.48212 |
| TC0X00003239.mm.1 | <a href="#">Prdx4</a>   | peroxiredoxin 4                                             | 8.33 ± 0.07        | 8.5 ± 0.05   | 8.49 ± 0.05 | 8.24 ± 0.1  | 0.6167               | 0.76626  | 0.00835 |
| TC0100000055.mm.1 | <a href="#">Prex2</a>   | phosphatidylinositol-3,4,5-trisphosphate-dependent Rac exch | 8.39 ± 0.08        | 8.28 ± 0.08  | 8.09 ± 0.1  | 8.42 ± 0.06 | 0.22304              | 0.32476  | 0.0093  |
| TC1200001602.mm.1 | <a href="#">Prkar2b</a> | protein kinase, cAMP dependent regulatory, type II beta     | 10.45 ± 0.18       | 10.17 ± 0.26 | 9.54 ± 0.36 | 10.76 ± 0.1 | 0.33548              | 0.12489  | 0.00446 |
| TC1400001659.mm.1 | <a href="#">Prkcd</a>   | protein kinase C, delta                                     | 8.01 ± 0.09        | 7.98 ± 0.03  | 8.26 ± 0.08 | 7.73 ± 0.1  | 0.93854              | 0.00532  | 0.00732 |
| TC0700003978.mm.1 | <a href="#">Prkcdbp</a> | protein kinase C, delta binding protein                     | 9.33 ± 0.11        | 9.38 ± 0.01  | 9.53 ± 0.06 | 9.03 ± 0.06 | 0.53149              | 0.02275  | 0.0019  |
| TC0200000211.mm.1 | <a href="#">Prkcg</a>   | protein kinase C, theta                                     | 5.84 ± 0.06        | 5.98 ± 0.05  | 5.74 ± 0.05 | 5.97 ± 0.08 | 0.39103              | 0.00971  | 0.43274 |
| TC0900000210.mm.1 | <a href="#">Prkcsh</a>  | protein kinase C substrate 80K-H                            | 8.38 ± 0.03        | 8.32 ± 0.03  | 8.28 ± 0.02 | 8.19 ± 0.01 | 0.00036              | 0.01827  | 0.44656 |
| TC0500002814.mm.1 | <a href="#">Prkg2</a>   | protein kinase, cGMP-dependent, type II                     | 5.91 ± 0.07        | 5.59 ± 0.05  | 6.17 ± 0.1  | 5.61 ± 0.08 | 0.04809              | 6.1E-05  | 0.07538 |
| TC0100000883.mm.1 | <a href="#">Prlh</a>    | prolactin releasing hormone                                 | 7.16 ± 0.03        | 7.56 ± 0.08  | 7.3 ± 0.11  | 7.52 ± 0.18 | 0.56513              | 0.00861  | 0.36021 |
| TC1600001201.mm.1 | <a href="#">Prm2</a>    | protamine 2                                                 | 6.11 ± 0.03        | 6.37 ± 0.06  | 6.15 ± 0.03 | 6.28 ± 0.11 | 0.73756              | 0.0074   | 0.27867 |
| TC0700002980.mm.1 | <a href="#">Prmt1</a>   | protein arginine N-methyltransferase 1                      | 8.19 ± 0.02        | 8.25 ± 0.01  | 8.26 ± 0.02 | 8.18 ± 0.03 | 0.84614              | 0.90418  | 0.00674 |
| TC0200002026.mm.1 | <a href="#">Prnp</a>    | prion protein                                               | 6.78 ± 0.05        | 6.72 ± 0.03  | 6.58 ± 0.02 | 6.66 ± 0.04 | 0.00273              | 0.86302  | 0.04261 |
| TC1800001177.mm.1 | <a href="#">Prob1</a>   | proline rich basic protein 1                                | 5.63 ± 0.04        | 5.82 ± 0.07  | 5.9 ± 0.03  | 5.73 ± 0.04 | 0.06624              | 0.81979  | 0.00133 |
| TC0X00001382.mm.1 | <a href="#">Prps1</a>   | phosphoribosyl pyrophosphate synthetase 1                   | 9.08 ± 0.09        | 8.57 ± 0.08  | 8.51 ± 0.02 | 8.5 ± 0.1   | 0.00226              | 0.0089   | 0.01183 |
| TC1500001101.mm.1 | <a href="#">Prr13</a>   | proline rich 13                                             | 6.8 ± 0.07         | 6.43 ± 0.07  | 6.71 ± 0.04 | 6.49 ± 0.04 | 0.9968               | 0.00066  | 0.37822 |
| TC1700000090.mm.1 | <a href="#">Prr18</a>   | proline rich region 18                                      | 5.21 ± 0.03        | 5.42 ± 0.02  | 5.36 ± 0.05 | 5.48 ± 0.07 | 0.04238              | 0.00366  | 0.46149 |
| TC0200004204.mm.1 | <a href="#">Prr5l</a>   | proline rich 5 like                                         | 6.14 ± 0.02        | 6.21 ± 0     | 6.3 ± 0.02  | 6.21 ± 0.02 | 0.00085              | 0.47861  | 0.00094 |
| TC1300001573.mm.1 | <a href="#">Prss16</a>  | protease, serine, 16 (thymus)                               | 4.61 ± 0.03        | 4.8 ± 0.02   | 4.69 ± 0.03 | 4.86 ± 0.07 | 0.1633               | 0.00141  | 0.93039 |
| TC0900000980.mm.1 | <a href="#">Prtg</a>    | protogenin homolog (Gallus gallus)                          | 4.72 ± 0.01        | 4.78 ± 0     | 4.78 ± 0    | 4.83 ± 0.03 | 0.00582              | 0.00513  | 0.75532 |
| TC0700000461.mm.1 | <a href="#">Prx</a>     | periaxin                                                    | 6.57 ± 0.02        | 6.69 ± 0.04  | 6.64 ± 0.02 | 6.76 ± 0.06 | 0.07051              | 0.0036   | 0.81812 |
| TC0200000383.mm.1 | <a href="#">Psd4</a>    | pleckstrin and Sec7 domain containing 4                     | 5.57 ± 0.04        | 5.75 ± 0.02  | 5.65 ± 0.05 | 5.75 ± 0.04 | 0.49257              | 0.00465  | 0.38975 |
| TC1100001777.mm.1 | <a href="#">Psmc5</a>   | protease (prosome, macropain) 26S subunit, ATPase 5         | 8.41 ± 0.04        | 8.34 ± 0.07  | 8.2 ± 0.03  | 8.22 ± 0.04 | 0.00397              | 0.58086  | 0.36379 |
| TC1600000286.mm.1 | <a href="#">Psmc2</a>   | proteasome (prosome, macropain) 26S subunit, non-ATPase     | 9.41 ± 0.03        | 9.27 ± 0.06  | 9.21 ± 0.03 | 9.22 ± 0.03 | 0.00567              | 0.10982  | 0.06193 |
| TC0400001593.mm.1 | <a href="#">Ptafr</a>   | platelet-activating factor receptor                         | 7.35 ± 0.11        | 7.08 ± 0.04  | 7.35 ± 0.03 | 6.99 ± 0.07 | 0.71742              | 0.00168  | 0.46908 |
| TC1700002190.mm.1 | <a href="#">Ptcra</a>   | pre T cell antigen receptor alpha                           | 6.09 ± 0.02        | 6.28 ± 0.04  | 6.18 ± 0.04 | 6.23 ± 0.05 | 0.71468              | 0.00835  | 0.12512 |
| TC1900000471.mm.1 | <a href="#">Pten</a>    | phosphatase and tensin homolog                              | 9.92 ± 0.04        | 9.75 ± 0.02  | 9.69 ± 0.02 | 9.64 ± 0.06 | 0.00188              | 0.02583  | 0.21579 |
| TC0200000228.mm.1 | <a href="#">Pter</a>    | phosphotriesterase related                                  | 7.01 ± 0.02        | 6.92 ± 0.04  | 7.09 ± 0.04 | 6.94 ± 0.03 | 0.20484              | 0.00127  | 0.48427 |
| TC1400000477.mm.1 | <a href="#">Ptger2</a>  | prostaglandin E receptor 2 (subtype EP2)                    | 4.08 ± 0.04        | 4.24 ± 0.04  | 4.13 ± 0    | 4.08 ± 0.04 | 0.21707              | 0.08213  | 0.00394 |
| TC0300002595.mm.1 | <a href="#">Ptgfrn</a>  | prostaglandin F2 receptor negative regulator                | 8.83 ± 0.06        | 8.79 ± 0.02  | 8.96 ± 0.08 | 8.54 ± 0.08 | 0.45755              | 0.00503  | 0.00602 |

Supplemental Table I

| Probe Set ID      | Symbol                     | Annotations<br>Description                                      | Summary Statistics |             |             |             | 2 way ANOVA p-values |          |         |
|-------------------|----------------------------|-----------------------------------------------------------------|--------------------|-------------|-------------|-------------|----------------------|----------|---------|
|                   |                            |                                                                 | XY sh              | XY Or       | XX sh       | XX Or       | XY vs XX             | Sh vs Or | Intrxn  |
| TC0400002744.mm.1 | <a href="#">Ptgr1</a>      | prostaglandin reductase 1                                       | 6.53 ± 0.03        | 6.45 ± 0.03 | 6.48 ± 0.03 | 6.3 ± 0.05  | 0.01685              | 0.00245  | 0.0731  |
| TC0900003116.mm.1 | <a href="#">Pth1r</a>      | parathyroid hormone 1 receptor                                  | 7.28 ± 0.04        | 7.28 ± 0.04 | 7.45 ± 0.02 | 7.39 ± 0.06 | 0.00913              | 0.45759  | 0.56782 |
| TC0200002990.mm.1 | <a href="#">Ptpla</a>      | protein tyrosine phosphatase-like (proline instead of catalytic | 8.02 ± 0.07        | 8.19 ± 0.04 | 8.04 ± 0.01 | 7.88 ± 0.06 | 0.02733              | 0.8983   | 0.00839 |
| TC1600000489.mm.1 | <a href="#">Ptplb</a>      | protein tyrosine phosphatase-like (proline instead of catalytic | 9.8 ± 0.15         | 9.31 ± 0.17 | 9.34 ± 0.17 | 9.86 ± 0.09 | 0.9446               | 0.77427  | 0.0029  |
| TC0300001064.mm.1 | <a href="#">Ptgn22</a>     | protein tyrosine phosphatase, non-receptor type 22 (lymphoid    | 4.88 ± 0.03        | 5 ± 0.02    | 4.79 ± 0.04 | 4.74 ± 0.12 | 0.00844              | 0.67344  | 0.28253 |
| TC0100001244.mm.1 | <a href="#">Ptgn7</a>      | protein tyrosine phosphatase, non-receptor type 7               | 5.87 ± 0.05        | 6.1 ± 0.05  | 5.98 ± 0.03 | 6.13 ± 0.07 | 0.19114              | 0.00252  | 0.4313  |
| TC0600000193.mm.1 | <a href="#">Ptprz1</a>     | protein tyrosine phosphatase, receptor type Z, polypeptide 1    | 8.94 ± 0.2         | 9.39 ± 0.08 | 9.32 ± 0.08 | 8.86 ± 0.16 | 0.74513              | 0.88293  | 0.00813 |
| TC1300001789.mm.1 | <a href="#">Pxdc1</a>      | PX domain containing 1                                          | 7.86 ± 0.11        | 8.19 ± 0.05 | 8.15 ± 0.08 | 7.87 ± 0.09 | 0.92988              | 0.7667   | 0.00483 |
| TC1200000253.mm.1 | <a href="#">Pxdn</a>       | peroxidasin homolog (Drosophila)                                | 8.59 ± 0.03        | 8.27 ± 0.05 | 8.29 ± 0.04 | 8.2 ± 0.04  | 0.0002               | 7.3E-05  | 0.00439 |
| TC1900000117.mm.1 | <a href="#">Pygm</a>       | muscle glycogen phosphorylase                                   | 8.64 ± 0.14        | 8.95 ± 0.05 | 9.12 ± 0.11 | 8.67 ± 0.12 | 0.38485              | 0.53915  | 0.00538 |
| TC1400002325.mm.1 | <a href="#">R3hcc1</a>     | R3H domain and coiled-coil containing 1                         | 6.98 ± 0.02        | 7.04 ± 0.01 | 7.14 ± 0.05 | 7.08 ± 0.03 | 0.00235              | 0.8835   | 0.05406 |
| TC0100001129.mm.1 | <a href="#">R3hdm1</a>     | R3H domain containing 1                                         | 8.17 ± 0.03        | 8.01 ± 0.01 | 8.01 ± 0.03 | 7.98 ± 0.04 | 0.00477              | 0.00661  | 0.04472 |
| TC1700001686.mm.1 | <a href="#">Rab11fip3</a>  | RAB11 family interacting protein 3 (class II)                   | 7.72 ± 0.04        | 7.82 ± 0.03 | 7.82 ± 0.04 | 7.67 ± 0.04 | 0.84016              | 0.67574  | 0.00267 |
| TC0600002610.mm.1 | <a href="#">Rab11fip5</a>  | RAB11 family interacting protein 5 (class I)                    | 7.85 ± 0.03        | 7.76 ± 0.03 | 7.92 ± 0.02 | 7.81 ± 0.01 | 0.00914              | 0.0014   | 0.41953 |
| TC0300000360.mm.1 | <a href="#">Rab33b</a>     | RAB33B, member of RAS oncogene family                           | 7.85 ± 0.05        | 7.94 ± 0.06 | 7.95 ± 0.04 | 7.73 ± 0.04 | 0.26921              | 0.21573  | 0.00745 |
| TC0100001779.mm.1 | <a href="#">Rab3gap2</a>   | RAB3 GTPase activating protein subunit 2                        | 8.23 ± 0.05        | 8.05 ± 0.03 | 7.86 ± 0.05 | 7.87 ± 0.08 | 0.00049              | 0.25428  | 0.17052 |
| TC1900000184.mm.1 | <a href="#">Rab3il1</a>    | RAB3A interacting protein (rabin3)-like 1                       | 6.76 ± 0.01        | 6.77 ± 0.01 | 6.86 ± 0.02 | 6.77 ± 0.02 | 0.00776              | 0.06428  | 0.00471 |
| TC1500002059.mm.1 | <a href="#">Rabl2</a>      | RAB, member of RAS oncogene family-like 2                       | 6.66 ± 0.03        | 6.57 ± 0.01 | 6.59 ± 0.03 | 6.49 ± 0.02 | 0.02798              | 0.00854  | 0.4537  |
| TC0100000886.mm.1 | <a href="#">Ramp1</a>      | receptor (calcitonin) activity modifying protein 1              | 6.86 ± 0.11        | 7.03 ± 0.07 | 7.11 ± 0.08 | 6.72 ± 0.12 | 0.86246              | 0.36822  | 0.00947 |
| TC1500002289.mm.1 | <a href="#">Rarg</a>       | retinoic acid receptor, gamma                                   | 7.4 ± 0.03         | 7.49 ± 0.02 | 7.52 ± 0.02 | 7.45 ± 0    | 0.06801              | 0.41885  | 0.00433 |
| TC1700001844.mm.1 | <a href="#">Rasal3</a>     | RAS protein activator like 3                                    | 5.46 ± 0.04        | 5.72 ± 0.04 | 5.55 ± 0.06 | 5.75 ± 0.07 | 0.38596              | 0.00062  | 0.69137 |
| TC0800000847.mm.1 | <a href="#">Rasd2</a>      | RASD family, member 2                                           | 5.52 ± 0.03        | 5.75 ± 0.03 | 5.51 ± 0.06 | 5.81 ± 0.05 | 0.38315              | 2.9E-05  | 0.63594 |
| TC0200004396.mm.1 | <a href="#">Rasgrp1</a>    | RAS guanyl releasing protein 1                                  | 5.65 ± 0.06        | 6.06 ± 0.11 | 5.76 ± 0.11 | 6.06 ± 0.16 | 0.6724               | 0.00747  | 0.70176 |
| TC0500001796.mm.1 | <a href="#">Rasl1a</a>     | RAS-like, family 11, member A                                   | 6.79 ± 0.06        | 6.96 ± 0.02 | 7.38 ± 0.05 | 6.8 ± 0.05  | 0.00177              | 0.00151  | 1E-05   |
| TC0500000699.mm.1 | <a href="#">Rasl1b</a>     | RAS-like, family 11, member B                                   | 7.52 ± 0.12        | 7.79 ± 0.07 | 8.15 ± 0.13 | 7.38 ± 0.09 | 0.38767              | 0.02854  | 0.00044 |
| TC1000003047.mm.1 | <a href="#">Rassf3</a>     | Ras association (RalGDS/AF-6) domain family member 3            | 9.5 ± 0.12         | 9.67 ± 0.07 | 9.98 ± 0.09 | 9.47 ± 0.09 | 0.17307              | 0.11577  | 0.00373 |
| TC0600002978.mm.1 | <a href="#">Rassf4</a>     | Ras association (RalGDS/AF-6) domain family member 4            | 7.36 ± 0.04        | 7.17 ± 0.07 | 7.09 ± 0.05 | 6.98 ± 0.07 | 0.00279              | 0.036    | 0.67484 |
| TC0600001722.mm.1 | <a href="#">Rassf8</a>     | Ras association (RalGDS/AF-6) domain family (N-terminal) m      | 7.97 ± 0.07        | 8.13 ± 0.05 | 8.13 ± 0.04 | 7.91 ± 0.06 | 0.70906              | 0.77975  | 0.00367 |
| TC0400001024.mm.1 | <a href="#">Raver2</a>     | ribonucleoprotein, PTB-binding 2                                | 6.22 ± 0.03        | 6.12 ± 0.03 | 6.43 ± 0.11 | 6.11 ± 0.03 | 0.10795              | 0.00301  | 0.06795 |
| TC0200004894.mm.1 | <a href="#">Rbck1</a>      | RanBP-type and C3HC4-type zinc finger containing 1              | 7.23 ± 0.02        | 7.29 ± 0    | 7.34 ± 0.02 | 7.31 ± 0.02 | 0.0068               | 0.55972  | 0.02974 |
| TSUnmapped000000: | <a href="#">Rbm14-rbm4</a> | Rbm14-Rbm4 readthrough (Rbm14-rbm4), transcript variant         | 7.43 ± 0.02        | 7.55 ± 0.04 | 7.31 ± 0.04 | 7.3 ± 0.06  | 0.00039              | 0.21866  | 0.13599 |
| TC0300000953.mm.1 | <a href="#">Rbm8a</a>      | RNA binding motif protein 8a                                    | 8.77 ± 0.04        | 8.94 ± 0.06 | 8.8 ± 0.04  | 8.71 ± 0.05 | 0.10057              | 0.31391  | 0.00955 |

Supplemental Table I

| Probe Set ID      | Symbol                        | Annotations<br>Description                                        | Summary Statistics |              |              |              | 2 way ANOVA p-values |          |         |
|-------------------|-------------------------------|-------------------------------------------------------------------|--------------------|--------------|--------------|--------------|----------------------|----------|---------|
|                   |                               |                                                                   | XY sh              | XY Or        | XX sh        | XX Or        | XY vs XX             | Sh vs Or | Intrxn  |
| TC0200003607.mm.1 | <a href="#">Rbms1</a>         | RNA binding motif, single stranded interacting protein 1          | 7.85 ± 0.01        | 7.75 ± 0.04  | 7.87 ± 0.02  | 7.76 ± 0.05  | 0.68454              | 0.00627  | 0.9609  |
| TC0900001232.mm.1 | <a href="#">Rbp1</a>          | retinol binding protein 1, cellular                               | 11.04 ± 0.12       | 11.33 ± 0.05 | 11.39 ± 0.08 | 11.06 ± 0.08 | 0.44827              | 0.92097  | 0.00271 |
| TC1700000839.mm.1 | <a href="#">Rcan2</a>         | regulator of calcineurin 2                                        | 8.95 ± 0.16        | 9.22 ± 0.07  | 9.32 ± 0.08  | 8.93 ± 0.08  | 0.59677              | 0.73166  | 0.00799 |
| TC0900000678.mm.1 | <a href="#">Rcn2</a>          | reticulocalbin 2                                                  | 7.77 ± 0.07        | 7.94 ± 0.03  | 7.97 ± 0.05  | 7.63 ± 0.1   | 0.61905              | 0.43062  | 0.00211 |
| TC1100001664.mm.1 | <a href="#">Rdm1</a>          | RAD52 motif 1                                                     | 6.94 ± 0.04        | 7.11 ± 0.03  | 7.27 ± 0.02  | 7.19 ± 0.02  | 1.5E-05              | 0.20837  | 0.00155 |
| TC0700002491.mm.1 | <a href="#">Relb</a>          | avian reticuloendotheliosis viral (v-rel) oncogene related B      | 6.8 ± 0.03         | 6.89 ± 0.01  | 6.97 ± 0.03  | 6.91 ± 0.03  | 0.00525              | 0.70424  | 0.0252  |
| TC0X00003301.mm.1 | <a href="#">Reps2</a>         | RALBP1 associated Eps domain containing protein 2                 | 7.34 ± 0.15        | 6.68 ± 0.06  | 7.17 ± 0.03  | 6.94 ± 0.08  | 0.4415               | 0.00165  | 0.10242 |
| TC0600000854.mm.1 | <a href="#">Retsat</a>        | retinol saturase (all trans retinol 13,14 reductase)              | 7.94 ± 0.21        | 7.77 ± 0.17  | 7.58 ± 0.2   | 8.36 ± 0.09  | 0.95254              | 0.27405  | 0.00743 |
| TC0200003206.mm.1 | <a href="#">Rexo4</a>         | REX4, RNA exonuclease 4 homolog (S. cerevisiae)                   | 6.87 ± 0.02        | 6.99 ± 0.03  | 6.91 ± 0.02  | 6.87 ± 0.02  | 0.15876              | 0.06665  | 0.00316 |
| TC0100002356.mm.1 | <a href="#">Rftn2</a>         | raftlin family member 2                                           | 7.7 ± 0.14         | 7.86 ± 0.04  | 8.28 ± 0.08  | 7.76 ± 0.09  | 0.03987              | 0.10758  | 0.00628 |
| TC0100003264.mm.1 | <a href="#">Rgl1</a>          | ral guanine nucleotide dissociation stimulator,-like 1            | 8.05 ± 0.04        | 7.89 ± 0.04  | 8 ± 0.04     | 7.92 ± 0.05  | 0.72029              | 0.00847  | 0.3262  |
| TC0100003604.mm.1 | <a href="#">Rgs7</a>          | regulator of G protein signaling 7                                | 7.77 ± 0.13        | 7.65 ± 0.05  | 7.26 ± 0.12  | 7.8 ± 0.08   | 0.07964              | 0.09917  | 0.00569 |
| TC1100002471.mm.1 | <a href="#">Rhbd1</a>         | rhomoid family 1 (Drosophila)                                     | 7.48 ± 0.03        | 7.59 ± 0.02  | 7.56 ± 0.02  | 7.5 ± 0.02   | 0.8722               | 0.20095  | 0.00181 |
| TC1100004122.mm.1 | <a href="#">Rhbd2</a>         | rhomoid 5 homolog 2 (Drosophila)                                  | 6.95 ± 0.03        | 7.08 ± 0.01  | 7.03 ± 0     | 7.01 ± 0.02  | 0.9362               | 0.05636  | 0.00704 |
| TC1000000656.mm.1 | <a href="#">Rhobtb1</a>       | Rho-related BTB domain containing 1                               | 7.59 ± 0.12        | 8.17 ± 0.11  | 7.67 ± 0.05  | 7.77 ± 0.04  | 0.19228              | 0.00218  | 0.0185  |
| TC0500003225.mm.1 | <a href="#">Rhof</a>          | ras homolog gene family, member f                                 | 5.41 ± 0.05        | 5.54 ± 0.04  | 5.44 ± 0.04  | 5.57 ± 0.05  | 0.42817              | 0.00586  | 0.85019 |
| TC0500000627.mm.1 | <a href="#">RhoH</a>          | ras homolog gene family, member H                                 | 4.8 ± 0.02         | 5.04 ± 0.07  | 4.81 ± 0.04  | 5.05 ± 0.06  | 0.86074              | 0.00045  | 0.9238  |
| TC0X00003424.mm.1 | <a href="#">Rhox3h</a>        | reproductive homeobox 3H                                          | 4.49 ± 0.03        | 4.67 ± 0.03  | 4.64 ± 0.03  | 4.58 ± 0.03  | 0.29658              | 0.03715  | 0.00067 |
| TC1200001142.mm.1 | <a href="#">Rian</a>          | RNA imprinted and accumulated in nucleus                          | 5.78 ± 0.1         | 5.39 ± 0.01  | 5.32 ± 0.06  | 5.32 ± 0.04  | 0.00662              | 0.05148  | 0.04373 |
| TC0200002166.mm.1 | <a href="#">Rin2</a>          | Ras and Rab interactor 2                                          | 7.46 ± 0.1         | 7.54 ± 0.04  | 7.88 ± 0.05  | 7.42 ± 0.09  | 0.08676              | 0.04147  | 0.00567 |
| TC0800001226.mm.1 | <a href="#">Rltpr</a>         | RGD motif, leucine rich repeats, tropomodulin domain and pro      | 5.84 ± 0.04        | 5.96 ± 0.04  | 5.87 ± 0.05  | 6.09 ± 0.08  | 0.14907              | 0.0053   | 0.33072 |
| TC1100002695.mm.1 | <a href="#">Rmnd5b</a>        | required for meiotic nuclear division 5 homolog B (S. cerevisiae) | 7.15 ± 0.02        | 7.21 ± 0     | 7.26 ± 0.02  | 7.2 ± 0.02   | 0.03966              | 0.66448  | 0.0097  |
| TC0200003512.mm.1 | <a href="#">Rnd3</a>          | Rho family GTPase 3                                               | 9.56 ± 0.12        | 9.61 ± 0.11  | 10.27 ± 0.16 | 9.44 ± 0.16  | 0.0816               | 0.01072  | 0.00757 |
| TC1700001639.mm.1 | <a href="#">Rnf151</a>        | ring finger protein 151                                           | 4.27 ± 0.03        | 4.51 ± 0.02  | 4.46 ± 0.07  | 4.58 ± 0.09  | 0.04423              | 0.00953  | 0.37057 |
| TC0100002887.mm.1 | <a href="#">Rnf152</a>        | ring finger protein 152                                           | 6.43 ± 0.13        | 6.41 ± 0.08  | 6.27 ± 0.09  | 6.78 ± 0.07  | 0.58209              | 0.07604  | 0.00982 |
| TC0400002788.mm.1 | <a href="#">Rnf183</a>        | ring finger protein 183                                           | 5.26 ± 0.03        | 5.41 ± 0.03  | 5.32 ± 0.01  | 5.39 ± 0.04  | 0.5                  | 0.0025   | 0.1553  |
| TC1100001315.mm.1 | <a href="#">Rnft1</a>         | ring finger protein, transmembrane 1                              | 8.45 ± 0.11        | 8.35 ± 0.07  | 8.74 ± 0.04  | 8.24 ± 0.13  | 0.38985              | 0.00676  | 0.0574  |
| TC0700004522.mm.1 | <a href="#">Rnh1</a>          | ribonuclease/angiogenin inhibitor 1                               | 8.38 ± 0.01        | 8.35 ± 0.02  | 8.48 ± 0.03  | 8.31 ± 0.03  | 0.17041              | 0.00305  | 0.00992 |
| TC0100003124.mm.1 | <a href="#">Rnpep</a>         | arginyl aminopeptidase (aminopeptidase B)                         | 7.63 ± 0.04        | 7.48 ± 0.03  | 7.63 ± 0.02  | 7.53 ± 0.04  | 0.79866              | 0.00194  | 0.33256 |
| TSUnmapped000000  | <a href="#">Rora</a>          | RAR-related orphan receptor alpha (Rora), transcript variant 1    | 8.54 ± 0.09        | 8.74 ± 0.03  | 8.68 ± 0.1   | 8.28 ± 0.11  | 0.10842              | 0.3338   | 0.00372 |
| TC0800003058.mm.1 | <a href="#">RP24-286J21.5</a> | novel transcript                                                  | 4.71 ± 0.05        | 5.02 ± 0.05  | 4.86 ± 0.08  | 4.93 ± 0.05  | 0.52838              | 0.00449  | 0.04326 |
| TC0400003779.mm.1 | <a href="#">Rpl11</a>         | ribosomal protein L11                                             | 6.67 ± 0.01        | 6.73 ± 0.01  | 6.72 ± 0.01  | 6.78 ± 0.03  | 0.02174              | 0.00461  | 0.95367 |



Supplemental Table I

| Probe Set ID       | Symbol                  | Annotations<br>Description                           | Summary Statistics |              |              |              | 2 way ANOVA p-values |          |         |
|--------------------|-------------------------|------------------------------------------------------|--------------------|--------------|--------------|--------------|----------------------|----------|---------|
|                    |                         |                                                      | XY sh              | XY Or        | XX sh        | XX Or        | XY vs XX             | Sh vs Or | Intrxn  |
| TC0800001508.mm.1  | <a href="#">Rpl13</a>   | ribosomal protein L13                                | 8.05 ± 0.04        | 8.18 ± 0.01  | 8.23 ± 0.02  | 8.15 ± 0.04  | 0.02467              | 0.39474  | 0.00451 |
| TC0800002412.mm.1  | <a href="#">Rpl18a</a>  | ribosomal protein L18A                               | 11.08 ± 0.02       | 11.22 ± 0.03 | 11.27 ± 0.03 | 11.25 ± 0.04 | 0.00313              | 0.0544   | 0.01541 |
| TC1600000460.mm.1  | <a href="#">Rpl35a</a>  | ribosomal protein L35A                               | 6.41 ± 0.02        | 6.48 ± 0.02  | 6.53 ± 0.02  | 6.45 ± 0.04  | 0.07029              | 0.95736  | 0.00875 |
| TC1700001012.mm.1  | <a href="#">Rpl36</a>   | ribosomal protein L36                                | 9.21 ± 0.03        | 9.29 ± 0.04  | 9.42 ± 0.05  | 9.44 ± 0.06  | 0.00163              | 0.39302  | 0.52474 |
| TC0100000609.mm.1  | <a href="#">Rpl37a</a>  | ribosomal protein L37a                               | 8.52 ± 0.03        | 8.69 ± 0.06  | 8.74 ± 0.03  | 8.62 ± 0.06  | 0.0837               | 0.58488  | 0.00486 |
| TC1100001874.mm.1  | <a href="#">Rpl38</a>   | ribosomal protein L38                                | 9.78 ± 0.02        | 9.92 ± 0.02  | 9.92 ± 0.03  | 9.99 ± 0.03  | 0.00134              | 0.0015   | 0.13947 |
| TC0900002450.mm.1  | <a href="#">Rplp1</a>   | ribosomal protein, large, P1                         | 11.21 ± 0.03       | 11.27 ± 0.04 | 11.43 ± 0.06 | 11.35 ± 0.06 | 0.00464              | 0.9317   | 0.1369  |
| TC0700002052.mm.1  | <a href="#">Rplp2</a>   | ribosomal protein, large P2                          | 7.05 ± 0.04        | 7.16 ± 0.02  | 7.19 ± 0.01  | 7.27 ± 0.05  | 0.00559              | 0.03792  | 0.88943 |
| TC0600001027.mm.1  | <a href="#">Rpn1</a>    | ribophorin I                                         | 10.2 ± 0.07        | 10.04 ± 0.03 | 10.07 ± 0.04 | 9.78 ± 0.07  | 0.01088              | 0.00371  | 0.16098 |
| TC0200002844.mm.1  | <a href="#">Rpp38</a>   | ribonuclease P/MRP 38 subunit                        | 8.57 ± 0.02        | 8.71 ± 0.02  | 8.61 ± 0.03  | 8.7 ± 0.06   | 0.55251              | 0.00497  | 0.45769 |
| TC1700001742.mm.1  | <a href="#">Rps10</a>   | ribosomal protein S10                                | 7.41 ± 0.02        | 7.48 ± 0.04  | 7.54 ± 0.02  | 7.53 ± 0.02  | 0.00394              | 0.16176  | 0.11332 |
| TC0800000440.mm.1  | <a href="#">Rps12l2</a> | ribosomal protein S12-like 2                         | 10.83 ± 0.04       | 10.91 ± 0.04 | 10.93 ± 0.01 | 10.78 ± 0.06 | 0.87989              | 0.51471  | 0.00958 |
| TC1800000616.mm.1  | <a href="#">Rps14</a>   | ribosomal protein S14                                | 6.14 ± 0.02        | 6.28 ± 0.04  | 6.38 ± 0.02  | 6.32 ± 0.04  | 0.00012              | 0.13024  | 0.00219 |
| TC0700000495.mm.1  | <a href="#">Rps16</a>   | ribosomal protein S16                                | 8.33 ± 0.04        | 8.46 ± 0.03  | 8.5 ± 0.01   | 8.4 ± 0.05   | 0.09083              | 0.56326  | 0.00692 |
| TC0700000401.mm.1  | <a href="#">Rps19</a>   | ribosomal protein S19                                | 6.99 ± 0.03        | 7.07 ± 0.01  | 7.08 ± 0.01  | 7.14 ± 0.03  | 0.00428              | 0.00946  | 0.55785 |
| TC1700000349.mm.1  | <a href="#">Rps2</a>    | ribosomal protein S2                                 | 6.96 ± 0.02        | 7.04 ± 0.01  | 7.05 ± 0.01  | 7.07 ± 0.02  | 0.00073              | 0.00859  | 0.06896 |
| TC0200002785.mm.1  | <a href="#">Rps21</a>   | ribosomal protein S21                                | 8.15 ± 0.03        | 8.31 ± 0.04  | 8.31 ± 0.01  | 8.23 ± 0.04  | 0.18304              | 0.23415  | 0.00203 |
| TC07000003798.mm.1 | <a href="#">Rps3</a>    | ribosomal protein S3                                 | 7.19 ± 0.03        | 7.32 ± 0.02  | 7.36 ± 0.01  | 7.28 ± 0.04  | 0.02009              | 0.33567  | 0.00104 |
| TC0700000151.mm.1  | <a href="#">Rps5</a>    | ribosomal protein S5                                 | 8.38 ± 0.03        | 8.53 ± 0.04  | 8.61 ± 0.01  | 8.58 ± 0.01  | 7.8E-05              | 0.02708  | 0.003   |
| TC0400003362.mm.1  | <a href="#">Rps8</a>    | ribosomal protein S8                                 | 7.67 ± 0.03        | 7.77 ± 0.02  | 7.76 ± 0.02  | 7.65 ± 0.06  | 0.71505              | 0.98256  | 0.00746 |
| TC0800002807.mm.1  | <a href="#">Rrad</a>    | Ras-related associated with diabetes                 | 8.4 ± 0.27         | 9.06 ± 0.21  | 9.31 ± 0.14  | 8.59 ± 0.04  | 0.40207              | 0.71347  | 0.00669 |
| TC07000004132.mm.1 | <a href="#">Rras2</a>   | related RAS viral (r-ras) oncogene homolog 2         | 7.79 ± 0.04        | 7.9 ± 0.06   | 7.76 ± 0.03  | 7.71 ± 0.03  | 0.00942              | 0.65281  | 0.07457 |
| TC1700000550.mm.1  | <a href="#">Rrp1b</a>   | ribosomal RNA processing 1 homolog B (S. cerevisiae) | 6.04 ± 0.03        | 6.17 ± 0.03  | 6.12 ± 0.02  | 6.03 ± 0.03  | 0.24079              | 0.44725  | 0.00208 |
| TC1100003566.mm.1  | <a href="#">Rsad1</a>   | radical S-adenosyl methionine domain containing 1    | 6.83 ± 0.01        | 6.94 ± 0.03  | 6.67 ± 0.04  | 6.94 ± 0.08  | 0.11939              | 0.00108  | 0.12048 |
| TC0400001433.mm.1  | <a href="#">Rspo1</a>   | R-spondin homolog (Xenopus laevis)                   | 7.5 ± 0.03         | 7.44 ± 0.07  | 7.75 ± 0.06  | 7.56 ± 0.07  | 0.00441              | 0.05049  | 0.21089 |
| TC1500001457.mm.1  | <a href="#">Rspo2</a>   | R-spondin 2 homolog (Xenopus laevis)                 | 4.84 ± 0.02        | 4.76 ± 0.04  | 5.1 ± 0.04   | 4.81 ± 0.05  | 0.00119              | 0.00015  | 0.01746 |
| TC1200001902.mm.1  | <a href="#">Rtn1</a>    | reticulum 1                                          | 7.41 ± 0.27        | 7.02 ± 0.2   | 6.66 ± 0.06  | 7.58 ± 0.09  | 0.81423              | 0.12646  | 0.00786 |
| TC1100001063.mm.1  | <a href="#">Rtn4rl1</a> | reticulum 4 receptor-like 1                          | 6.97 ± 0.04        | 6.83 ± 0.05  | 7.36 ± 0.09  | 7.02 ± 0.02  | 0.00018              | 0.00089  | 0.10005 |
| TC0400000435.mm.1  | <a href="#">Rusc2</a>   | RUN and SH3 domain containing 2                      | 7.4 ± 0.06         | 7.61 ± 0.05  | 7.52 ± 0.05  | 7.42 ± 0.03  | 0.79209              | 0.2083   | 0.00568 |
| TC0100001554.mm.1  | <a href="#">Rxrg</a>    | retinoid X receptor gamma                            | 6.63 ± 0.1         | 6.6 ± 0.06   | 6.44 ± 0.11  | 6.88 ± 0.05  | 0.94265              | 0.08153  | 0.00802 |
| TC0300000853.mm.1  | <a href="#">S100a10</a> | S100 calcium binding protein A10 (calpactin)         | 6.81 ± 0.06        | 6.47 ± 0.07  | 6.5 ± 0.03   | 6.42 ± 0.04  | 0.00618              | 0.00219  | 0.03871 |
| TC0300000806.mm.1  | <a href="#">S100a3</a>  | S100 calcium binding protein A3                      | 4.92 ± 0.04        | 5.2 ± 0.07   | 5.11 ± 0.04  | 5.23 ± 0.09  | 0.06844              | 0.00394  | 0.16397 |



Supplemental Table I

| Probe Set ID      | Symbol                    | Annotations<br>Description                                       | Summary Statistics |             |              |              | 2 way ANOVA p-values |          |         |
|-------------------|---------------------------|------------------------------------------------------------------|--------------------|-------------|--------------|--------------|----------------------|----------|---------|
|                   |                           |                                                                  | XY sh              | XY Or       | XX sh        | XX Or        | XY vs XX             | Sh vs Or | Intrxn  |
| TC0300000807.mm.1 | <a href="#">S100a4</a>    | S100 calcium binding protein A4                                  | 6.55 ± 0.1         | 6.88 ± 0.1  | 6.74 ± 0.06  | 6.47 ± 0.05  | 0.26961              | 0.64777  | 0.00323 |
| TC0300000810.mm.1 | <a href="#">S100a7a</a>   | S100 calcium binding protein A7A                                 | 5.51 ± 0.08        | 5.85 ± 0.05 | 5.78 ± 0.08  | 5.54 ± 0.11  | 0.83673              | 0.49781  | 0.00289 |
| TC0900001864.mm.1 | <a href="#">S1pr5</a>     | sphingosine-1-phosphate receptor 5                               | 5.43 ± 0.03        | 5.65 ± 0.07 | 5.7 ± 0.08   | 5.78 ± 0.07  | 0.00605              | 0.02457  | 0.24392 |
| TC1400000507.mm.1 | <a href="#">Samd4</a>     | sterile alpha motif domain containing 4                          | 8.76 ± 0.13        | 9.03 ± 0.06 | 9.06 ± 0.07  | 8.64 ± 0.1   | 0.81241              | 0.61147  | 0.00278 |
| TC1000000572.mm.1 | <a href="#">Sar1a</a>     | SAR1 gene homolog A ( <i>S. cerevisiae</i> )                     | 10.75 ± 0.04       | 10.7 ± 0.06 | 10.61 ± 0.02 | 10.49 ± 0.06 | 0.00579              | 0.14872  | 0.3741  |
| TC0200003214.mm.1 | <a href="#">Sardh</a>     | sarcosine dehydrogenase                                          | 7.13 ± 0.02        | 7.21 ± 0.01 | 7.17 ± 0.01  | 7.15 ± 0.01  | 0.63855              | 0.01801  | 0.00173 |
| TC1900000961.mm.1 | <a href="#">Sart1</a>     | squamous cell carcinoma antigen recognized by T cells 1          | 7.32 ± 0.02        | 7.36 ± 0.01 | 7.36 ± 0.01  | 7.32 ± 0.01  | 0.8221               | 0.52812  | 0.00303 |
| TC1000001716.mm.1 | <a href="#">Sash1</a>     | SAM and SH3 domain containing 1                                  | 8.75 ± 0.04        | 8.73 ± 0.07 | 9.03 ± 0.05  | 8.6 ± 0.1    | 0.33915              | 0.00588  | 0.01087 |
| TC0X00000427.mm.1 | <a href="#">Sash3</a>     | SAM and SH3 domain containing 3                                  | 6.22 ± 0.01        | 6.43 ± 0.04 | 6.33 ± 0.06  | 6.47 ± 0.06  | 0.09715              | 0.00126  | 0.38303 |
| TC1400000938.mm.1 | <a href="#">Scara5</a>    | scavenger receptor class A, member 5 (putative)                  | 8.61 ± 0.08        | 8.31 ± 0.01 | 8.69 ± 0.05  | 8.19 ± 0.08  | 0.99175              | 4.3E-05  | 0.07725 |
| TC0500003271.mm.1 | <a href="#">Scarb1</a>    | scavenger receptor class B, member 1                             | 7.88 ± 0.13        | 7.56 ± 0.09 | 7.54 ± 0.09  | 7.84 ± 0.03  | 0.71455              | 0.90091  | 0.0071  |
| TC1600000225.mm.1 | <a href="#">Scarf2</a>    | scavenger receptor class F, member 2                             | 7.78 ± 0.09        | 8.02 ± 0.06 | 8.11 ± 0.05  | 7.91 ± 0.03  | 0.0872               | 0.68069  | 0.00358 |
| TC1000000388.mm.1 | <a href="#">Scml4</a>     | sex comb on midleg-like 4 ( <i>Drosophila</i> )                  | 5.38 ± 0.02        | 5.45 ± 0.02 | 5.39 ± 0.03  | 5.46 ± 0.02  | 0.62629              | 0.00593  | 0.98358 |
| TC0400003234.mm.1 | <a href="#">Scp2</a>      | sterol carrier protein 2, liver                                  | 8.97 ± 0.12        | 8.67 ± 0.15 | 8.52 ± 0.14  | 9.01 ± 0.04  | 0.41052              | 0.66359  | 0.00288 |
| TC1700000471.mm.1 | <a href="#">Scube3</a>    | signal peptide, CUB domain, EGF-like 3                           | 9.28 ± 0.22        | 9.79 ± 0.09 | 9.69 ± 0.1   | 9.25 ± 0.1   | 0.76246              | 0.74192  | 0.0079  |
| TC1200000069.mm.1 | <a href="#">Sdc1</a>      | syndecan 1                                                       | 7.3 ± 0.02         | 7.35 ± 0.02 | 7.53 ± 0.06  | 7.33 ± 0.04  | 0.01144              | 0.04348  | 0.00474 |
| TC0500001337.mm.1 | <a href="#">Sds</a>       | serine dehydratase                                               | 5.17 ± 0.04        | 5.44 ± 0.02 | 5.33 ± 0.01  | 5.41 ± 0.08  | 0.321                | 0.00388  | 0.09549 |
| TC0700003016.mm.1 | <a href="#">Sec1</a>      | secretory blood group 1                                          | 5.57 ± 0.03        | 5.69 ± 0.04 | 5.75 ± 0.03  | 5.79 ± 0.08  | 0.00564              | 0.04899  | 0.29143 |
| TC1800000682.mm.1 | <a href="#">Sec11c</a>    | SEC11 homolog C ( <i>S. cerevisiae</i> )                         | 6.9 ± 0.02         | 6.84 ± 0.04 | 6.95 ± 0.02  | 6.86 ± 0.03  | 0.48518              | 0.00954  | 0.76184 |
| TC1100000033.mm.1 | <a href="#">Sec14l3</a>   | SEC14-like 3 ( <i>S. cerevisiae</i> )                            | 4.65 ± 0.02        | 4.72 ± 0.01 | 4.69 ± 0.01  | 4.83 ± 0.07  | 0.04916              | 0.00894  | 0.39667 |
| TC0200002150.mm.1 | <a href="#">Sec23b</a>    | SEC23B ( <i>S. cerevisiae</i> )                                  | 8 ± 0.05           | 7.84 ± 0.05 | 7.78 ± 0.04  | 7.7 ± 0.06   | 0.00798              | 0.06745  | 0.6183  |
| TC0100001495.mm.1 | <a href="#">Sele</a>      | selectin, endothelial cell                                       | 4.52 ± 0.02        | 4.72 ± 0.07 | 4.36 ± 0.06  | 4.41 ± 0.05  | 0.00053              | 0.03149  | 0.15039 |
| TC1100000015.mm.1 | <a href="#">Selm</a>      | selenoprotein M                                                  | 8.03 ± 0.06        | 8.05 ± 0.04 | 8.23 ± 0.05  | 8.11 ± 0.02  | 0.00509              | 0.63576  | 0.0669  |
| TC0500000131.mm.1 | <a href="#">Sema3c</a>    | sema domain, immunoglobulin domain (Ig), short basic doma        | 9.5 ± 0.14         | 9.76 ± 0.06 | 9.79 ± 0.09  | 9.4 ± 0.11   | 0.97167              | 0.74682  | 0.00833 |
| TC1400000325.mm.1 | <a href="#">Sema3g</a>    | sema domain, immunoglobulin domain (Ig), short basic doma        | 6.93 ± 0.05        | 6.79 ± 0.02 | 6.75 ± 0.06  | 6.88 ± 0.04  | 0.21299              | 0.65248  | 0.00516 |
| TC1500000002.mm.1 | <a href="#">Sepp1</a>     | selenoprotein P, plasma, 1                                       | 7.65 ± 0.04        | 7.47 ± 0.02 | 7.7 ± 0.03   | 7.51 ± 0.09  | 0.31092              | 0.00354  | 0.87578 |
| TC0700004318.mm.1 | <a href="#">Sept1</a>     | septin 1                                                         | 5.83 ± 0.05        | 6.17 ± 0.02 | 5.97 ± 0.05  | 6.17 ± 0.07  | 0.28312              | 0.00029  | 0.33887 |
| TC0400003629.mm.1 | <a href="#">Serinc2</a>   | serine incorporator 2                                            | 6.65 ± 0.04        | 6.79 ± 0.03 | 6.92 ± 0.04  | 6.93 ± 0.12  | 0.0068               | 0.2761   | 0.3259  |
| TC1200002288.mm.1 | <a href="#">Serpina12</a> | serine (or cysteine) peptidase inhibitor, clade A (alpha-1 antip | 4.51 ± 0.02        | 4.7 ± 0.06  | 4.52 ± 0.03  | 4.72 ± 0.1   | 0.93176              | 0.00521  | 0.88654 |
| TC1200002289.mm.1 | <a href="#">Serpina3c</a> | serine (or cysteine) peptidase inhibitor, clade A, member 3C     | 7.81 ± 0.21        | 6.69 ± 0.14 | 6.92 ± 0.09  | 6.61 ± 0.29  | 0.03586              | 0.00394  | 0.07828 |
| TC1200001044.mm.1 | <a href="#">Serpina3k</a> | serine (or cysteine) peptidase inhibitor, clade A, member 3K     | 6.19 ± 0.26        | 5.24 ± 0.22 | 5.4 ± 0.01   | 5.02 ± 0.13  | 0.04488              | 0.0097   | 0.29062 |
| TC1200001047.mm.1 | <a href="#">Serpina3n</a> | serine (or cysteine) peptidase inhibitor, clade A, member 3N     | 9.52 ± 0.18        | 8.29 ± 0.23 | 8.96 ± 0.09  | 7.7 ± 0.19   | 0.01186              | 1.8E-05  | 0.73697 |

Supplemental Table I

| Probe Set ID      | Symbol                   | Annotations<br>Description                                            | Summary Statistics |              |              |             | 2 way ANOVA p-values |          |         |
|-------------------|--------------------------|-----------------------------------------------------------------------|--------------------|--------------|--------------|-------------|----------------------|----------|---------|
|                   |                          |                                                                       | XY sh              | XY Or        | XX sh        | XX Or       | XY vs XX             | Sh vs Or | Intrxn  |
| TC0100001031.mm.1 | <a href="#">Serpnb8</a>  | serine (or cysteine) peptidase inhibitor, clade B, member 8           | 6.47 ± 0.07        | 6.3 ± 0.06   | 6.24 ± 0.06  | 6.06 ± 0.07 | 0.00566              | 0.03064  | 0.72383 |
| TC1300000364.mm.1 | <a href="#">Serpnb9</a>  | serine (or cysteine) peptidase inhibitor, clade B, member 9           | 7.98 ± 0.07        | 8.11 ± 0.04  | 8.33 ± 0.09  | 7.92 ± 0.12 | 0.28998              | 0.16656  | 0.00507 |
| TC1300000365.mm.1 | <a href="#">Serpnb9b</a> | serine (or cysteine) peptidase inhibitor, clade B, member 9b          | 4.52 ± 0.04        | 4.65 ± 0.04  | 4.68 ± 0.03  | 4.56 ± 0.03 | 0.3068               | 0.81264  | 0.00347 |
| TC0100002645.mm.1 | <a href="#">Serpine2</a> | serine (or cysteine) peptidase inhibitor, clade E, member 2           | 11.05 ± 0.16       | 11.37 ± 0.07 | 11.34 ± 0.08 | 10.98 ± 0.1 | 0.74655              | 0.99362  | 0.00884 |
| TC0200003880.mm.1 | <a href="#">Serpinq1</a> | serine (or cysteine) peptidase inhibitor, clade G, member 1           | 11.63 ± 0.06       | 11.49 ± 0.02 | 11.72 ± 0.05 | 11.38 ± 0.1 | 0.8424               | 0.00546  | 0.07693 |
| TC0700003797.mm.1 | <a href="#">Serpinh1</a> | serine (or cysteine) peptidase inhibitor, clade H, member 1           | 8.55 ± 0.09        | 8.47 ± 0.05  | 8.54 ± 0.07  | 8.11 ± 0.05 | 0.03006              | 0.00512  | 0.01516 |
| TC0700000460.mm.1 | <a href="#">Sertad1</a>  | SERTA domain containing 1                                             | 6.93 ± 0.02        | 7.18 ± 0.03  | 7.1 ± 0.03   | 7.14 ± 0.08 | 0.18248              | 0.00531  | 0.03052 |
| TC0100003830.mm.1 | <a href="#">Sertad4</a>  | SERTA domain containing 4                                             | 6.36 ± 0.04        | 6.44 ± 0.01  | 6.61 ± 0.07  | 6.42 ± 0.02 | 0.00731              | 0.40252  | 0.00316 |
| TC1800001640.mm.1 | <a href="#">Setbp1</a>   | SET binding protein 1                                                 | 8.54 ± 0.14        | 8.87 ± 0.07  | 8.85 ± 0.08  | 8.57 ± 0.08 | 0.87307              | 0.72238  | 0.00965 |
| TC0800002927.mm.1 | <a href="#">Sf3b3</a>    | splicing factor 3b, subunit 3                                         | 8.34 ± 0.05        | 8.32 ± 0.03  | 8.24 ± 0.02  | 8.07 ± 0.09 | 0.00946              | 0.11435  | 0.16125 |
| TC0400001477.mm.1 | <a href="#">Sfpq</a>     | splicing factor proline/glutamine rich (polypyrimidine tract binding) | 7.05 ± 0.05        | 7.04 ± 0.07  | 6.81 ± 0.04  | 6.88 ± 0.09 | 0.00661              | 0.68554  | 0.56358 |
| TC1300000623.mm.1 | <a href="#">Sfxn1</a>    | sideroflexin 1                                                        | 9.12 ± 0.09        | 8.78 ± 0.12  | 8.85 ± 0.1   | 9.07 ± 0.02 | 0.7708               | 0.34064  | 0.00456 |
| TC1000000171.mm.1 | <a href="#">Sgk1</a>     | serum/glucocorticoid regulated kinase 1                               | 6.99 ± 0.09        | 7.11 ± 0.06  | 6.76 ± 0.02  | 6.83 ± 0.06 | 0.00295              | 0.13687  | 0.62751 |
| TC0300002959.mm.1 | <a href="#">Sgms2</a>    | sphingomyelin synthase 2                                              | 8.42 ± 0.13        | 8.35 ± 0.04  | 8.2 ± 0.06   | 7.89 ± 0.07 | 0.00639              | 0.14516  | 0.07381 |
| TC0900001099.mm.1 | <a href="#">Sh3bgrl2</a> | SH3 domain binding glutamic acid-rich protein like 2                  | 6.67 ± 0.15        | 6.26 ± 0.12  | 6.25 ± 0.12  | 6.63 ± 0.06 | 0.80443              | 0.84889  | 0.00647 |
| TC1500002333.mm.1 | <a href="#">Sh3bp1</a>   | SH3-domain binding protein 1                                          | 6.53 ± 0.03        | 6.64 ± 0.05  | 6.71 ± 0.04  | 6.61 ± 0.02 | 0.0421               | 0.70965  | 0.00715 |
| TC0400003529.mm.1 | <a href="#">Sh3d21</a>   | SH3 domain containing 21                                              | 6.51 ± 0.05        | 6.68 ± 0.03  | 6.57 ± 0.02  | 6.59 ± 0.04 | 0.97459              | 0.00903  | 0.03237 |
| TC1100000341.mm.1 | <a href="#">Sh3pxd2b</a> | SH3 and PX domains 2B                                                 | 7.63 ± 0.04        | 7.65 ± 0.02  | 7.77 ± 0.06  | 7.42 ± 0.06 | 0.53208              | 0.0083   | 0.0014  |
| TC0600001821.mm.1 | <a href="#">Shfm1</a>    | split hand/foot malformation (ectrodactyly) type 1                    | 8.29 ± 0.03        | 8.32 ± 0.04  | 8.21 ± 0.03  | 8.17 ± 0.03 | 0.00309              | 0.58734  | 0.52189 |
| TC1100001018.mm.1 | <a href="#">Shpk</a>     | sedoheptulokinase                                                     | 6.19 ± 0.1         | 5.97 ± 0.03  | 5.9 ± 0.07   | 6.19 ± 0.07 | 0.79192              | 0.53454  | 0.00778 |
| TC1600001642.mm.1 | <a href="#">Sidt1</a>    | SID1 transmembrane family, member 1                                   | 4.45 ± 0.01        | 4.56 ± 0.02  | 4.42 ± 0.05  | 4.56 ± 0.04 | 0.50692              | 0.00303  | 0.62853 |
| TC0700004519.mm.1 | <a href="#">Sigirr</a>   | single immunoglobulin and toll-interleukin 1 receptor (TIR) domain    | 6.03 ± 0.02        | 6.15 ± 0.02  | 6.1 ± 0.02   | 6.18 ± 0.05 | 0.14581              | 0.0044   | 0.57772 |
| TC0700000757.mm.1 | <a href="#">Siglecg</a>  | sialic acid binding Ig-like lectin G                                  | 5.13 ± 0.03        | 5.36 ± 0.03  | 5.25 ± 0.03  | 5.42 ± 0.1  | 0.20713              | 0.00726  | 0.80845 |
| TC1700001827.mm.1 | <a href="#">Sik1</a>     | salt inducible kinase 1                                               | 7.58 ± 0.06        | 7.92 ± 0.02  | 7.49 ± 0.1   | 8.06 ± 0.2  | 0.94373              | 0.00152  | 0.25936 |
| TC0700000511.mm.1 | <a href="#">Sirt2</a>    | sirtuin 2 (silent mating type information regulation 2, homolog 2)    | 9.41 ± 0.02        | 9.42 ± 0.02  | 9.49 ± 0.01  | 9.46 ± 0.02 | 0.00706              | 0.67307  | 0.17851 |
| TC1200001913.mm.1 | <a href="#">Six4</a>     | sine oculis-related homeobox 4                                        | 6.13 ± 0.05        | 6.28 ± 0.05  | 6.34 ± 0.01  | 6.2 ± 0.02  | 0.06948              | 0.7783   | 0.00175 |
| TC0700000287.mm.1 | <a href="#">Six5</a>     | sine oculis-related homeobox 5                                        | 7.35 ± 0.01        | 7.45 ± 0.04  | 7.51 ± 0.05  | 7.41 ± 0.02 | 0.09919              | 0.94844  | 0.0096  |
| TC0200005003.mm.1 | <a href="#">Sla2</a>     | Src-like-adaptor 2                                                    | 5.74 ± 0.04        | 6.07 ± 0.05  | 5.83 ± 0.07  | 6.02 ± 0.07 | 0.67039              | 0.00051  | 0.25226 |
| TC1400001189.mm.1 | <a href="#">Slain1</a>   | SLAIN motif family, member 1                                          | 4.68 ± 0.05        | 4.81 ± 0.02  | 4.7 ± 0.05   | 4.83 ± 0.03 | 0.503                | 0.00532  | 0.7703  |
| TC1800000583.mm.1 | <a href="#">Slc12a2</a>  | solute carrier family 12, member 2                                    | 7.61 ± 0.11        | 7.21 ± 0.1   | 6.95 ± 0.07  | 7.37 ± 0.09 | 0.0188               | 0.96192  | 0.00094 |
| TC1100001895.mm.1 | <a href="#">Slc16a5</a>  | solute carrier family 16 (monocarboxylic acid transporters), member 5 | 5.06 ± 0.02        | 5.35 ± 0.06  | 5.19 ± 0.04  | 5.35 ± 0.08 | 0.25191              | 0.00067  | 0.21226 |
| TC1000000674.mm.1 | <a href="#">Slc16a9</a>  | solute carrier family 16 (monocarboxylic acid transporters), member 9 | 6.97 ± 0.01        | 6.81 ± 0.03  | 7.13 ± 0.04  | 6.74 ± 0.08 | 0.34036              | 2.5E-05  | 0.01423 |

Supplemental Table I

| Probe Set ID      | Symbol                   | Annotations<br>Description                                       | Summary Statistics |              |              |             | 2 way ANOVA p-values |          |         |
|-------------------|--------------------------|------------------------------------------------------------------|--------------------|--------------|--------------|-------------|----------------------|----------|---------|
|                   |                          |                                                                  | XY sh              | XY Or        | XX sh        | XX Or       | XY vs XX             | Sh vs Or | Intrxn  |
| TC1000002658.mm.1 | <a href="#">Slc17a8</a>  | solute carrier family 17 (sodium-dependent inorganic phospho     | 4.84 ± 0.02        | 5.05 ± 0.06  | 4.94 ± 0.05  | 5.07 ± 0.09 | 0.26536              | 0.00834  | 0.46226 |
| TC1900000850.mm.1 | <a href="#">Slc18a2</a>  | solute carrier family 18 (vesicular monoamine), member 2         | 8.56 ± 0.83        | 6.92 ± 0.39  | 5.85 ± 0.2   | 8.16 ± 0.31 | 0.3282               | 0.38823  | 0.00652 |
| TC0700000236.mm.1 | <a href="#">Slc1a5</a>   | solute carrier family 1 (neutral amino acid transporter), memb   | 9.51 ± 0.09        | 9.02 ± 0.1   | 9.03 ± 0.07  | 9.19 ± 0.07 | 0.05501              | 0.04318  | 0.00125 |
| TC0200001951.mm.1 | <a href="#">Slc20a1</a>  | solute carrier family 20, member 1                               | 6.47 ± 0.04        | 6.34 ± 0.02  | 6.27 ± 0.03  | 6.35 ± 0.01 | 0.00748              | 0.47111  | 0.00615 |
| TC1700000124.mm.1 | <a href="#">Slc22a2</a>  | solute carrier family 22 (organic cation transporter), member 2  | 6.18 ± 0.05        | 6 ± 0.01     | 5.93 ± 0.04  | 5.76 ± 0.1  | 0.00261              | 0.01995  | 0.87489 |
| TC1300001784.mm.1 | <a href="#">Slc22a23</a> | solute carrier family 22, member 23                              | 7.28 ± 0.11        | 7.01 ± 0.12  | 7.03 ± 0.14  | 7.4 ± 0.1   | 0.77473              | 0.95031  | 0.00905 |
| TC1100002754.mm.1 | <a href="#">Slc22a4</a>  | solute carrier family 22 (organic cation transporter), member 4  | 6.7 ± 0.05         | 6.3 ± 0.06   | 6.56 ± 0.02  | 6.37 ± 0.06 | 0.4187               | 5.1E-05  | 0.04522 |
| TC1100002748.mm.1 | <a href="#">Slc22a5</a>  | solute carrier family 22 (organic cation transporter), member 5  | 7.58 ± 0.07        | 7.41 ± 0.1   | 7.36 ± 0.06  | 7.61 ± 0.04 | 0.60146              | 0.89424  | 0.00529 |
| TC0800001867.mm.1 | <a href="#">Slc25a15</a> | solute carrier family 25 (mitochondrial carrier ornithine transp | 6.78 ± 0.05        | 6.61 ± 0.06  | 6.61 ± 0.07  | 6.78 ± 0.04 | 0.7335               | 0.83169  | 0.00472 |
| TC0400004050.mm.1 | <a href="#">Slc25a33</a> | solute carrier family 25, member 33                              | 6.38 ± 0.14        | 6.3 ± 0.08   | 5.84 ± 0.1   | 6.46 ± 0.11 | 0.10394              | 0.04624  | 0.00725 |
| TC0800000796.mm.1 | <a href="#">Slc27a1</a>  | solute carrier family 27 (fatty acid transporter), member 1      | 9.22 ± 0.14        | 9.03 ± 0.18  | 8.57 ± 0.16  | 9.5 ± 0.09  | 0.3779               | 0.04201  | 0.00127 |
| TC0200001898.mm.1 | <a href="#">Slc27a2</a>  | solute carrier family 27 (fatty acid transporter), member 2      | 7.87 ± 0.34        | 6.88 ± 0.19  | 6.08 ± 0.3   | 7.57 ± 0.29 | 0.07087              | 0.48984  | 0.0009  |
| TC0200002549.mm.1 | <a href="#">Slc2a10</a>  | solute carrier family 2 (facilitated glucose transporter), memb  | 7.54 ± 0.06        | 7.67 ± 0.03  | 7.69 ± 0.05  | 7.52 ± 0.02 | 0.65917              | 0.98973  | 0.00503 |
| TC0100001859.mm.1 | <a href="#">Slc30a1</a>  | solute carrier family 30 (zinc transporter), member 1            | 7.58 ± 0.03        | 7.62 ± 0.05  | 7.44 ± 0.03  | 7.51 ± 0.04 | 0.00548              | 0.08748  | 0.764   |
| TC0400000698.mm.1 | <a href="#">Slc31a1</a>  | solute carrier family 31, member 1                               | 7.62 ± 0.35        | 6.86 ± 0.16  | 6.53 ± 0.07  | 7.36 ± 0.15 | 0.31324              | 0.72388  | 0.00806 |
| TC1100001460.mm.1 | <a href="#">Slc35b1</a>  | solute carrier family 35, member B1                              | 8.36 ± 0.03        | 8.32 ± 0.02  | 8.34 ± 0.06  | 8.11 ± 0.06 | 0.01927              | 0.00827  | 0.06343 |
| TC1100002777.mm.1 | <a href="#">Slc36a2</a>  | solute carrier family 36 (proton/amino acid symporter), memb     | 8.31 ± 0.25        | 8.2 ± 0.2    | 7.69 ± 0.33  | 8.97 ± 0.08 | 0.86782              | 0.07373  | 0.0045  |
| TC1700002811.mm.1 | <a href="#">Slc39a7</a>  | solute carrier family 39 (zinc transporter), member 7            | 8.52 ± 0.03        | 8.44 ± 0.02  | 8.52 ± 0.03  | 8.4 ± 0.03  | 0.57393              | 0.00872  | 0.38947 |
| TC1900001066.mm.1 | <a href="#">Slc3a2</a>   | solute carrier family 3 (activators of dibasic and neutral amin  | 8.82 ± 0.04        | 8.69 ± 0.01  | 8.64 ± 0.02  | 8.75 ± 0.02 | 0.15667              | 0.81346  | 0.0046  |
| TC0200001226.mm.1 | <a href="#">Slc43a3</a>  | solute carrier family 43, member 3                               | 10.5 ± 0.11        | 10.03 ± 0.05 | 10.38 ± 0.05 | 9.79 ± 0.09 | 0.14583              | 7.8E-05  | 0.24866 |
| TC1500001698.mm.1 | <a href="#">Slc45a4</a>  | solute carrier family 45, member 4                               | 6.92 ± 0.01        | 6.93 ± 0.02  | 7.03 ± 0.01  | 6.93 ± 0.01 | 0.0035               | 0.00707  | 0.00298 |
| TC0100000665.mm.1 | <a href="#">Slc4a3</a>   | solute carrier family 4 (anion exchanger), member 3              | 7.28 ± 0.04        | 7.4 ± 0.03   | 7.47 ± 0.05  | 7.33 ± 0.02 | 0.11205              | 0.89319  | 0.00267 |
| TC0500000819.mm.1 | <a href="#">Slc4a4</a>   | solute carrier family 4 (anion exchanger), member 4              | 8.6 ± 0.2          | 8.27 ± 0.18  | 7.7 ± 0.21   | 8.83 ± 0.2  | 0.25583              | 0.12649  | 0.00179 |
| TC0500002170.mm.1 | <a href="#">Slc5a6</a>   | solute carrier family 5 (sodium-dependent vitamin transporter)   | 7.27 ± 0.13        | 6.92 ± 0.06  | 6.66 ± 0.05  | 6.9 ± 0.03  | 0.00745              | 0.86467  | 0.01098 |
| TC0400003285.mm.1 | <a href="#">Slc5a9</a>   | solute carrier family 5 (sodium/glucose cotransporter), memb     | 4.32 ± 0.01        | 4.46 ± 0.04  | 4.32 ± 0.03  | 4.45 ± 0.07 | 0.97923              | 0.00519  | 0.89744 |
| TC0800001080.mm.1 | <a href="#">Slc6a2</a>   | solute carrier family 6 (neurotransmitter transporter, noradren  | 9.34 ± 0.81        | 7.7 ± 0.57   | 6.67 ± 0.2   | 9.35 ± 0.32 | 0.54562              | 0.28027  | 0.0044  |
| TC1800001410.mm.1 | <a href="#">Slc6a7</a>   | solute carrier family 6 (neurotransmitter transporter, L-proline | 6 ± 0.02           | 6.34 ± 0.03  | 6.11 ± 0.04  | 6.23 ± 0.07 | 0.91354              | 0.00011  | 0.02052 |
| TC0700000655.mm.1 | <a href="#">Slc7a10</a>  | solute carrier family 7 (cationic amino acid transporter, y+ sys | 7.08 ± 0.08        | 7 ± 0.06     | 6.73 ± 0.03  | 7.15 ± 0.07 | 0.13705              | 0.02192  | 0.00196 |
| TC0700000221.mm.1 | <a href="#">Slc8a2</a>   | solute carrier family 8 (sodium/calcium exchanger), member 2     | 6.71 ± 0.11        | 7.04 ± 0.06  | 6.99 ± 0.08  | 6.8 ± 0.06  | 0.80625              | 0.41635  | 0.00957 |
| TC1700001634.mm.1 | <a href="#">Slc9a3r2</a> | solute carrier family 9 (sodium/hydrogen exchanger), membe       | 8.66 ± 0.05        | 8.46 ± 0.02  | 8.34 ± 0.05  | 8.41 ± 0.01 | 0.00062              | 0.24876  | 0.00895 |
| TC0700003804.mm.1 | <a href="#">Slc02b1</a>  | solute carrier organic anion transporter family, member 2b1      | 8.52 ± 0.09        | 8.15 ± 0.05  | 8.43 ± 0.02  | 8.13 ± 0.07 | 0.71269              | 0.00068  | 0.99044 |
| TC0800002518.mm.1 | <a href="#">Smad1</a>    | SMAD family member 1                                             | 7.68 ± 0.03        | 7.84 ± 0.03  | 7.75 ± 0.02  | 7.73 ± 0.02 | 0.48998              | 0.01468  | 0.00358 |

Supplemental Table I

| Probe Set ID      | Symbol                     | Annotations<br>Description                                   | Summary Statistics |              |              |              | 2 way ANOVA p-values |          |         |
|-------------------|----------------------------|--------------------------------------------------------------|--------------------|--------------|--------------|--------------|----------------------|----------|---------|
|                   |                            |                                                              | XY sh              | XY Or        | XX sh        | XX Or        | XY vs XX             | Sh vs Or | Intrxn  |
| TC1300001136.mm.1 | <a href="#">Smn1</a>       | survival motor neuron 1                                      | 6.91 ± 0.02        | 7 ± 0.01     | 7.01 ± 0.02  | 6.97 ± 0.01  | 0.15022              | 0.40585  | 0.00633 |
| TC1200000751.mm.1 | <a href="#">Smoc1</a>      | SPARC related modular calcium binding 1                      | 9.52 ± 0.15        | 9.83 ± 0.08  | 9.78 ± 0.08  | 9.32 ± 0.12  | 0.33273              | 0.57875  | 0.00717 |
| TC0200002077.mm.1 | <a href="#">Snap25</a>     | synaptosomal-associated protein 25                           | 9.51 ± 0.87        | 7.84 ± 0.59  | 6.11 ± 0.46  | 9.53 ± 0.31  | 0.30659              | 0.12907  | 0.00283 |
| TC0900000816.mm.1 | <a href="#">Snapc5</a>     | small nuclear RNA activating complex, polypeptide 5          | 7.13 ± 0.05        | 7.01 ± 0.1   | 7.21 ± 0.05  | 6.92 ± 0.08  | 0.65463              | 0.00717  | 0.40048 |
| TC0600000215.mm.1 | <a href="#">Snd1</a>       | staphylococcal nuclease and tudor domain containing 1        | 8.41 ± 0.02        | 8.37 ± 0     | 8.37 ± 0.02  | 8.27 ± 0.01  | 0.00082              | 0.0015   | 0.0282  |
| TC1800000310.mm.1 | <a href="#">Snhg4</a>      | small nucleolar RNA host gene 4 (non-protein coding)         | 4.52 ± 0.02        | 4.52 ± 0.03  | 4.56 ± 0.01  | 4.6 ± 0.02   | 0.00866              | 0.29341  | 0.54732 |
| TC0400002711.mm.1 | <a href="#">SNORA43</a>    | Small nucleolar RNA SNORA43                                  | 6.69 ± 0.05        | 6.92 ± 0.07  | 6.78 ± 0.02  | 6.86 ± 0.02  | 0.95161              | 0.00705  | 0.21641 |
| TC1100001783.mm.1 | <a href="#">Snord104</a>   | small nucleolar RNA, C/D box 104                             | 9.99 ± 0.05        | 10.23 ± 0.07 | 10.33 ± 0.07 | 10.11 ± 0.09 | 0.12619              | 0.8834   | 0.00543 |
| TC0700003300.mm.1 | <a href="#">Snord116</a>   | small nucleolar RNA, C/D box 116                             | 8.2 ± 0.92         | 6.54 ± 0.46  | 5.73 ± 0.19  | 8.12 ± 0.28  | 0.62156              | 0.43793  | 0.00906 |
| TC0700003329.mm.1 | <a href="#">Snord116l2</a> | small nucleolar RNA, C/D box 116-like 2                      | 8.15 ± 0.92        | 6.41 ± 0.51  | 5.46 ± 0.27  | 8.11 ± 0.29  | 0.56595              | 0.37983  | 0.00606 |
| TC0900000458.mm.1 | <a href="#">Snord14e</a>   | small nucleolar RNA, C/D box 14E                             | 10.29 ± 0.05       | 10.28 ± 0.07 | 10 ± 0.04    | 10.07 ± 0.03 | 0.00056              | 0.37371  | 0.61989 |
| TC0900001635.mm.1 | <a href="#">Snrk</a>       | SNF related kinase                                           | 8.64 ± 0.05        | 8.74 ± 0.09  | 8.39 ± 0.08  | 8.85 ± 0.09  | 0.21037              | 0.00421  | 0.01667 |
| TC1100000333.mm.1 | <a href="#">Snrnp25</a>    | small nuclear ribonucleoprotein 25 (U11/U12)                 | 6.03 ± 0.03        | 6.1 ± 0.01   | 6.1 ± 0.03   | 6.18 ± 0.03  | 0.00917              | 0.00917  | 0.87729 |
| TC1200001583.mm.1 | <a href="#">Sntg2</a>      | syntrophin, gamma 2                                          | 6.69 ± 0.13        | 7.01 ± 0.04  | 7.1 ± 0.06   | 6.84 ± 0.08  | 0.22653              | 0.74723  | 0.00771 |
| TC0600000609.mm.1 | <a href="#">Snx10</a>      | sorting nexin 10                                             | 7.97 ± 0.14        | 7.64 ± 0.12  | 7.4 ± 0.18   | 7.98 ± 0.09  | 0.27595              | 0.59461  | 0.00274 |
| TC1300002697.mm.1 | <a href="#">Snx18</a>      | sorting nexin 18                                             | 8.69 ± 0.1         | 8.9 ± 0.03   | 9.19 ± 0.07  | 8.72 ± 0.11  | 0.10616              | 0.10897  | 0.00221 |
| TC1000000382.mm.1 | <a href="#">Snx3</a>       | sorting nexin 3                                              | 9.4 ± 0.02         | 9.35 ± 0.01  | 9.37 ± 0.02  | 9.29 ± 0.02  | 0.04362              | 0.0037   | 0.48953 |
| TC0200005011.mm.1 | <a href="#">Soga1</a>      | suppressor of glucose, autophagy associated 1                | 7.86 ± 0.05        | 7.94 ± 0.03  | 8 ± 0.03     | 7.86 ± 0.02  | 0.30065              | 0.51836  | 0.00601 |
| TC1900001485.mm.1 | <a href="#">Sorbs1</a>     | sorbin and SH3 domain containing 1                           | 8.76 ± 0.11        | 8.56 ± 0.07  | 8.34 ± 0.11  | 8.74 ± 0.01  | 0.10385              | 0.51032  | 0.00256 |
| TC1100003630.mm.1 | <a href="#">Sp2</a>        | Sp2 transcription factor                                     | 7.11 ± 0.02        | 7.21 ± 0.02  | 7.21 ± 0.02  | 7.17 ± 0.02  | 0.27323              | 0.2108   | 0.00584 |
| TC1100002783.mm.1 | <a href="#">Sparc</a>      | secreted acidic cysteine rich glycoprotein                   | 12.38 ± 0.05       | 12.23 ± 0.03 | 12.15 ± 0.02 | 11.87 ± 0.06 | 7E-05                | 0.00121  | 0.0704  |
| TC1200000967.mm.1 | <a href="#">Spata7</a>     | spermatogenesis associated 7                                 | 5.03 ± 0.02        | 4.95 ± 0.03  | 5.02 ± 0.03  | 4.93 ± 0.02  | 0.69638              | 0.00531  | 0.69638 |
| TC0100000424.mm.1 | <a href="#">Spats2l</a>    | spermatogenesis associated, serine-rich 2-like               | 7.05 ± 0.09        | 7.47 ± 0.06  | 7.26 ± 0.02  | 7.19 ± 0.05  | 0.6317               | 0.02674  | 0.00353 |
| TC1100000789.mm.1 | <a href="#">Specc1</a>     | sperm antigen with calponin homology and coiled-coil domain  | 7.12 ± 0.07        | 7.28 ± 0.05  | 7.31 ± 0.07  | 7.11 ± 0.02  | 0.59641              | 0.95317  | 0.00557 |
| TC0300000416.mm.1 | <a href="#">Spg20</a>      | spastic paraplegia 20, spartin (Troyer syndrome) homolog (hu | 7.71 ± 0.05        | 7.8 ± 0.03   | 7.77 ± 0.03  | 7.63 ± 0.04  | 0.34727              | 0.84799  | 0.00787 |
| TC0700002967.mm.1 | <a href="#">SpiB</a>       | Spi-B transcription factor (Spi-1/PU.1 related)              | 5.11 ± 0.1         | 5.66 ± 0.07  | 5.58 ± 0.1   | 5.74 ± 0.1   | 0.03005              | 0.00582  | 0.13784 |
| TC0X00002659.mm.1 | <a href="#">Spin4</a>      | spindlin family, member 4                                    | 6.2 ± 0.05         | 6.33 ± 0.08  | 6.27 ± 0.05  | 6.05 ± 0.05  | 0.13525              | 0.56418  | 0.00651 |
| TC0700002720.mm.1 | <a href="#">Spint2</a>     | serine protease inhibitor, Kunitz type 2                     | 7.35 ± 0.11        | 7.7 ± 0.03   | 7.66 ± 0.07  | 7.4 ± 0.06   | 0.81627              | 0.453    | 0.00153 |
| TC1800001507.mm.1 | <a href="#">Spire1</a>     | spire homolog 1 (Drosophila)                                 | 7.81 ± 0.05        | 7.73 ± 0.01  | 7.61 ± 0.05  | 7.66 ± 0.05  | 0.00864              | 0.56097  | 0.13322 |
| TC0700004313.mm.1 | <a href="#">Spn</a>        | sialophorin                                                  | 5.34 ± 0.03        | 5.57 ± 0.05  | 5.42 ± 0.05  | 5.52 ± 0.04  | 0.78395              | 0.00172  | 0.16438 |
| TC0700001668.mm.1 | <a href="#">Spon1</a>      | spondin 1, (f-spondin) extracellular matrix protein          | 7.47 ± 0.09        | 7.2 ± 0.07   | 7.41 ± 0.06  | 7.13 ± 0.06  | 0.64473              | 0.00652  | 0.67341 |
| TC0600002605.mm.1 | <a href="#">Spr</a>        | sepiapterin reductase                                        | 7.92 ± 0.02        | 8.02 ± 0.03  | 8.07 ± 0.02  | 8 ± 0        | 0.01074              | 0.53578  | 0.00325 |

Supplemental Table I

| Probe Set ID      | Symbol                     | Annotations<br>Description                                                        | Summary Statistics |              |              |              | 2 way ANOVA p-values |          |         |
|-------------------|----------------------------|-----------------------------------------------------------------------------------|--------------------|--------------|--------------|--------------|----------------------|----------|---------|
|                   |                            |                                                                                   | XY sh              | XY Or        | XX sh        | XX Or        | XY vs XX             | Sh vs Or | Intrxn  |
| TC0300000828.mm.1 | <a href="#">Spr2h</a>      | small proline-rich protein 2H                                                     | 4.36 ± 0.03        | 4.45 ± 0.03  | 4.38 ± 0.05  | 4.54 ± 0.06  | 0.19912              | 0.0092   | 0.43302 |
| TC0300000288.mm.1 | <a href="#">Spry1</a>      | sprouty homolog 1 (Drosophila)                                                    | 7.32 ± 0.02        | 7.47 ± 0.03  | 7.68 ± 0.03  | 7.45 ± 0.01  | 2.4E-05              | 0.09473  | 6.6E-06 |
| TC1200001747.mm.1 | <a href="#">Sptssa</a>     | serine palmitoyltransferase, small subunit A                                      | 8.6 ± 0.04         | 8.75 ± 0.08  | 8.78 ± 0.01  | 8.6 ± 0.03   | 0.71036              | 0.8352   | 0.00571 |
| TC0200001859.mm.1 | <a href="#">Sqrld</a>      | sulfide quinone reductase-like (yeast)                                            | 7.67 ± 0.05        | 7.47 ± 0.05  | 7.6 ± 0.03   | 7.55 ± 0.04  | 0.75111              | 0.00596  | 0.06017 |
| TC1100002664.mm.1 | <a href="#">Sqstm1</a>     | sequestosome 1                                                                    | 9.14 ± 0.06        | 8.99 ± 0.01  | 8.94 ± 0.03  | 8.9 ± 0.05   | 0.00916              | 0.11069  | 0.34519 |
| TC0100003058.mm.1 | <a href="#">Srgap2</a>     | SLIT-ROBO Rho GTPase activating protein 2                                         | 7.49 ± 0.04        | 7.34 ± 0.03  | 7.47 ± 0.03  | 7.32 ± 0.07  | 0.81284              | 0.00744  | 0.83093 |
| TC0400001934.mm.1 | <a href="#">Srm</a>        | spermidine synthase                                                               | 8.02 ± 0.03        | 7.96 ± 0.02  | 7.84 ± 0.05  | 7.84 ± 0.04  | 0.00202              | 0.6626   | 0.62941 |
| TC1200000458.mm.1 | <a href="#">Srp54a</a>     | signal recognition particle 54A                                                   | 10.51 ± 0.05       | 10.49 ± 0.06 | 10.32 ± 0.06 | 10.21 ± 0.08 | 0.00361              | 0.38715  | 0.35572 |
| TC1200000460.mm.1 | <a href="#">Srp54b</a>     | signal recognition particle 54B                                                   | 10.56 ± 0.05       | 10.55 ± 0.06 | 10.38 ± 0.06 | 10.29 ± 0.07 | 0.00326              | 0.47862  | 0.38379 |
| TC1200000462.mm.1 | <a href="#">Srp54c</a>     | signal recognition particle 54C                                                   | 10.19 ± 0.05       | 10.17 ± 0.06 | 10.03 ± 0.07 | 9.9 ± 0.08   | 0.00545              | 0.31892  | 0.33314 |
| TC0500000734.mm.1 | <a href="#">Srp72</a>      | signal recognition particle 72                                                    | 9.06 ± 0.03        | 8.92 ± 0.03  | 8.83 ± 0.02  | 8.82 ± 0.09  | 0.00782              | 0.22896  | 0.32766 |
| TC0X00003417.mm.1 | <a href="#">SrpX</a>       | sushi-repeat-containing protein                                                   | 8.38 ± 0.12        | 7.53 ± 0.04  | 8.04 ± 0.09  | 7.27 ± 0.17  | 0.05537              | 2.1E-05  | 0.92198 |
| TC0500003439.mm.1 | <a href="#">Srrt</a>       | serrate RNA effector molecule homolog (Arabidopsis)                               | 7.84 ± 0.02        | 7.82 ± 0.03  | 7.74 ± 0.02  | 7.69 ± 0.05  | 0.00635              | 0.40833  | 0.61416 |
| TC0Y00000240.mm.1 | <a href="#">Sry</a>        | sex determining region of Chr Y                                                   | 7.16 ± 0.05        | 7.46 ± 0.05  | 7.87 ± 0.12  | 7.91 ± 0.1   | 1.1E-05              | 0.07554  | 0.15941 |
| TC1900000913.mm.1 | <a href="#">Ssh3</a>       | slingshot homolog 3 (Drosophila)                                                  | 7.57 ± 0.08        | 7.68 ± 0.05  | 7.84 ± 0.05  | 7.61 ± 0.03  | 0.08591              | 0.47396  | 0.00975 |
| TC1500001920.mm.1 | <a href="#">St13</a>       | suppression of tumorigenicity 13                                                  | 9.7 ± 0.05         | 9.59 ± 0.06  | 9.47 ± 0.05  | 9.48 ± 0.05  | 0.00637              | 0.38042  | 0.27618 |
| TC0700004076.mm.1 | <a href="#">St5</a>        | suppression of tumorigenicity 5                                                   | 8.93 ± 0.14        | 9.11 ± 0.05  | 9.32 ± 0.08  | 8.77 ± 0.14  | 0.68608              | 0.17138  | 0.00577 |
| TC1100004124.mm.1 | <a href="#">St6galnac2</a> | ST6 (alpha-N-acetyl-neuraminyl-2,3-beta-galactosyl-1,3)-N-acetylglucosaminidase 2 | 6.71 ± 0.01        | 6.58 ± 0.04  | 6.74 ± 0.04  | 6.63 ± 0.03  | 0.17746              | 0.00199  | 0.80278 |
| TC1400001671.mm.1 | <a href="#">Stab1</a>      | stabilin 1                                                                        | 8.01 ± 0.05        | 7.87 ± 0.03  | 7.99 ± 0.03  | 7.81 ± 0.04  | 0.51809              | 0.00416  | 0.47378 |
| TC0X00000933.mm.1 | <a href="#">Stard8</a>     | START domain containing 8                                                         | 6.91 ± 0.01        | 6.82 ± 0.04  | 6.92 ± 0.02  | 6.86 ± 0.01  | 0.17809              | 0.00636  | 0.64503 |
| TC1100003790.mm.1 | <a href="#">Stat3</a>      | signal transducer and activator of transcription 3                                | 8.73 ± 0.06        | 8.58 ± 0.03  | 8.56 ± 0.02  | 8.43 ± 0.01  | 0.00376              | 0.00884  | 0.76592 |
| TC1100002457.mm.1 | <a href="#">Stc2</a>       | stanniocalcin 2                                                                   | 5.51 ± 0.01        | 5.62 ± 0.04  | 5.52 ± 0     | 5.49 ± 0.02  | 0.02732              | 0.0409   | 0.00301 |
| TC0500001912.mm.1 | <a href="#">Steap2</a>     | six transmembrane epithelial antigen of prostate 2                                | 5.76 ± 0.04        | 5.75 ± 0.01  | 5.89 ± 0.04  | 5.69 ± 0.05  | 0.18265              | 0.05038  | 0.00875 |
| TC0500000043.mm.1 | <a href="#">Steap4</a>     | STEAP family member 4                                                             | 10.05 ± 0.06       | 9.43 ± 0.12  | 9.78 ± 0.04  | 9.22 ± 0.16  | 0.04134              | 7.5E-05  | 0.8678  |
| TC1900001031.mm.1 | <a href="#">Stip1</a>      | stress-induced phosphoprotein 1                                                   | 9.9 ± 0.13         | 9.72 ± 0.13  | 9.5 ± 0.07   | 9.39 ± 0.04  | 0.00831              | 0.32526  | 0.96223 |
| TC0500002274.mm.1 | <a href="#">Stk32b</a>     | serine/threonine kinase 32B                                                       | 6.39 ± 0.08        | 6.52 ± 0.01  | 6.67 ± 0.05  | 6.55 ± 0.02  | 0.00825              | 0.67283  | 0.01995 |
| TC0300000043.mm.1 | <a href="#">Stmn2</a>      | stathmin-like 2                                                                   | 10 ± 0.59          | 8.83 ± 0.26  | 8.36 ± 0.06  | 9.91 ± 0.21  | 0.68878              | 0.43839  | 0.00772 |
| TC1100004227.mm.1 | <a href="#">Stra13</a>     | stimulated by retinoic acid 13                                                    | 8.53 ± 0.04        | 8.66 ± 0.03  | 8.74 ± 0.05  | 8.75 ± 0.05  | 0.00424              | 0.15143  | 0.31507 |
| TSUnmapped000000! | <a href="#">Sts</a>        | steroid sulfatase                                                                 | 8.09 ± 0.01        | 8.19 ± 0.02  | 8.23 ± 0.02  | 8.24 ± 0.05  | 0.00823              | 0.06725  | 0.16498 |
| TC0900003182.mm.1 | <a href="#">Stt3b</a>      | STT3, subunit of the oligosaccharyltransferase complex, homolog 3                 | 10.38 ± 0.06       | 10.27 ± 0.07 | 10.18 ± 0.02 | 10.11 ± 0.05 | 0.0046               | 0.09828  | 0.63426 |
| TC1000001761.mm.1 | <a href="#">Stx11</a>      | syntaxin 11                                                                       | 6.13 ± 0.06        | 6.33 ± 0.03  | 6.4 ± 0.04   | 6.27 ± 0.05  | 0.07098              | 0.64583  | 0.00731 |
| TC0200005164.mm.1 | <a href="#">Sulf2</a>      | sulfatase 2                                                                       | 9.91 ± 0.04        | 9.65 ± 0.03  | 9.81 ± 0.03  | 9.48 ± 0.07  | 0.02383              | 4.4E-05  | 0.28428 |



Supplemental Table I

| Probe Set ID      | Symbol                   | Annotations<br>Description                                            | Summary Statistics |             |             |             | 2 way ANOVA p-values |          |         |
|-------------------|--------------------------|-----------------------------------------------------------------------|--------------------|-------------|-------------|-------------|----------------------|----------|---------|
|                   |                          |                                                                       | XY sh              | XY Or       | XX sh       | XX Or       | XY vs XX             | Sh vs Or | Intrxn  |
| TC0700004291.mm.1 | <a href="#">Sult1a1</a>  | sulfotransferase family 1A, phenol-preferring, member 1               | 8.86 ± 0.11        | 8.67 ± 0.07 | 8.48 ± 0.06 | 8.38 ± 0.13 | 0.00813              | 0.24232  | 0.86279 |
| TC0500002700.mm.1 | <a href="#">Sult1e1</a>  | sulfotransferase family 1E, member 1                                  | 5.99 ± 0.27        | 3.31 ± 0.06 | 5.6 ± 0.34  | 3.27 ± 0.08 | 0.40277              | 8.4E-08  | 0.49178 |
| TC0800003091.mm.1 | <a href="#">Sult5a1</a>  | sulfotransferase family 5A, member 1                                  | 6.27 ± 0.04        | 5.77 ± 0.06 | 6.51 ± 0.04 | 5.91 ± 0.05 | 0.00066              | 3.4E-08  | 0.20653 |
| TC1000003158.mm.1 | <a href="#">Suox</a>     | sulfite oxidase                                                       | 8.12 ± 0.08        | 8 ± 0.07    | 8.02 ± 0.07 | 8.26 ± 0.03 | 0.45386              | 0.64783  | 0.00842 |
| TC0200003205.mm.1 | <a href="#">Surf4</a>    | surfeit gene 4                                                        | 9.83 ± 0.01        | 9.81 ± 0.02 | 9.76 ± 0.02 | 9.7 ± 0.02  | 0.00084              | 0.07835  | 0.17565 |
| TC0400002733.mm.1 | <a href="#">Svep1</a>    | sushi, von Willebrand factor type A, EGF and pentraxin domain         | 8.4 ± 0.06         | 8.17 ± 0.04 | 8.27 ± 0.08 | 7.93 ± 0.05 | 0.01563              | 0.00056  | 0.26428 |
| TC0800000968.mm.1 | <a href="#">Syce2</a>    | synaptonemal complex central element protein 2                        | 6.28 ± 0.03        | 6.38 ± 0.02 | 6.33 ± 0.02 | 6.4 ± 0.03  | 0.25458              | 0.00578  | 0.58096 |
| TC1000002458.mm.1 | <a href="#">Syde1</a>    | synapse defective 1, Rho GTPase, homolog 1 (C. elegans)               | 8.16 ± 0.09        | 8.32 ± 0.03 | 8.39 ± 0.03 | 8.18 ± 0.06 | 0.44086              | 0.76083  | 0.00957 |
| TC0600001275.mm.1 | <a href="#">Syn2</a>     | synapsin II                                                           | 8.27 ± 0.55        | 7.3 ± 0.29  | 6.6 ± 0.1   | 8.19 ± 0.2  | 0.45598              | 0.28641  | 0.00763 |
| TC1000002828.mm.1 | <a href="#">Syt1</a>     | synaptotagmin I                                                       | 8.73 ± 0.83        | 7.19 ± 0.56 | 5.75 ± 0.28 | 8.61 ± 0.35 | 0.30753              | 0.21432  | 0.00468 |
| TC1400000372.mm.1 | <a href="#">Syt15</a>    | synaptotagmin XV                                                      | 7.67 ± 0.12        | 8.02 ± 0.1  | 8.27 ± 0.11 | 7.9 ± 0.06  | 0.03775              | 0.99963  | 0.00443 |
| TC1800001111.mm.1 | <a href="#">Syt4</a>     | synaptotagmin IV                                                      | 8.17 ± 0.79        | 6.72 ± 0.51 | 5.6 ± 0.13  | 7.98 ± 0.28 | 0.38229              | 0.28029  | 0.00717 |
| TC0700001280.mm.1 | <a href="#">Syt2</a>     | synaptotagmin-like 2                                                  | 5.65 ± 0.04        | 5.53 ± 0.06 | 5.87 ± 0.06 | 5.54 ± 0.08 | 0.06073              | 0.00404  | 0.09691 |
| TC0X00000122.mm.1 | <a href="#">Syt5</a>     | synaptotagmin-like 5                                                  | 8.15 ± 0.22        | 8.04 ± 0.06 | 8.97 ± 0.15 | 7.58 ± 0.34 | 0.36236              | 0.00603  | 0.00895 |
| TC1000000199.mm.1 | <a href="#">Taar7b</a>   | trace amine-associated receptor 7B                                    | 4.36 ± 0.06        | 4.75 ± 0.06 | 4.68 ± 0.04 | 4.66 ± 0.04 | 0.14883              | 0.01114  | 0.00555 |
| TC0200002937.mm.1 | <a href="#">Taf3</a>     | TAF3 RNA polymerase II, TATA box binding protein (TBP)-associated     | 6.98 ± 0.04        | 7.11 ± 0.02 | 7.12 ± 0.03 | 7.05 ± 0.02 | 0.16657              | 0.26862  | 0.00443 |
| TC1800000124.mm.1 | <a href="#">Taf4b</a>    | TAF4B RNA polymerase II, TATA box binding protein (TBP)-associated    | 6.15 ± 0.02        | 5.94 ± 0.06 | 5.96 ± 0.04 | 6.03 ± 0.03 | 0.26289              | 0.15143  | 0.00455 |
| TC0500000591.mm.1 | <a href="#">Tbc1d1</a>   | TBC1 domain family, member 1                                          | 7.84 ± 0.08        | 7.95 ± 0.04 | 8.01 ± 0.06 | 7.71 ± 0.09 | 0.79718              | 0.27711  | 0.00964 |
| TC1900000907.mm.1 | <a href="#">Tbc1d10c</a> | TBC1 domain family, member 10c                                        | 5.66 ± 0.02        | 5.88 ± 0.02 | 5.76 ± 0.03 | 5.96 ± 0.1  | 0.08207              | 0.00099  | 0.75002 |
| TC1000002894.mm.1 | <a href="#">Tbc1d15</a>  | TBC1 domain family, member 15                                         | 7.52 ± 0.04        | 7.49 ± 0.05 | 7.39 ± 0.02 | 7.36 ± 0.05 | 0.00906              | 0.66213  | 0.93662 |
| TC0500001576.mm.1 | <a href="#">Tbl2</a>     | transducin (beta)-like 2                                              | 7.7 ± 0.02         | 7.66 ± 0.02 | 7.58 ± 0.04 | 7.57 ± 0.05 | 0.00561              | 0.48467  | 0.62672 |
| TC0300000990.mm.1 | <a href="#">Tbx15</a>    | T-box 15                                                              | 5.19 ± 0.03        | 5.36 ± 0.04 | 5.38 ± 0.04 | 5.3 ± 0.03  | 0.08204              | 0.22153  | 0.00414 |
| TC1000000894.mm.1 | <a href="#">Tbxa2r</a>   | thromboxane A2 receptor                                               | 6.71 ± 0.05        | 6.94 ± 0.05 | 6.97 ± 0.06 | 6.84 ± 0.03 | 0.13653              | 0.40866  | 0.00375 |
| TC1100001566.mm.1 | <a href="#">Tcap</a>     | titin-cap                                                             | 7.68 ± 0.14        | 8.09 ± 0.07 | 7.2 ± 0.08  | 7.88 ± 0.09 | 0.01415              | 8E-05    | 0.42007 |
| TC0X00003007.mm.1 | <a href="#">Tceal6</a>   | transcription elongation factor A (SII)-like 6                        | 7.86 ± 0.13        | 8.08 ± 0.06 | 8.23 ± 0.12 | 7.76 ± 0.14 | 0.68362              | 0.39791  | 0.00918 |
| TC0X00003021.mm.1 | <a href="#">Tceal8</a>   | transcription elongation factor A (SII)-like 8                        | 7.66 ± 0.04        | 7.7 ± 0.02  | 7.66 ± 0.01 | 7.55 ± 0.03 | 0.07631              | 0.46932  | 0.00923 |
| TC0400003216.mm.1 | <a href="#">Tceanc2</a>  | transcription elongation factor A (SII) N-terminal and central domain | 7.02 ± 0.02        | 7.04 ± 0.01 | 7.11 ± 0.01 | 7.04 ± 0.01 | 0.00311              | 0.36485  | 0.00492 |
| TC1700001969.mm.1 | <a href="#">Tcf19</a>    | transcription factor 19                                               | 6.03 ± 0.05        | 6.14 ± 0.02 | 6.22 ± 0.03 | 6.17 ± 0.04 | 0.00742              | 0.31447  | 0.02635 |
| TC1100002715.mm.1 | <a href="#">Tcf7</a>     | transcription factor 7, T cell specific                               | 5.69 ± 0.05        | 6.41 ± 0.29 | 5.65 ± 0.08 | 6.33 ± 0.26 | 0.69674              | 0.00319  | 0.97754 |
| TC1800001409.mm.1 | <a href="#">Tcof1</a>    | Treacher Collins Franceschetti syndrome 1, homolog                    | 7.02 ± 0.03        | 7.12 ± 0    | 7.17 ± 0.02 | 7.14 ± 0.02 | 0.0024               | 0.12964  | 0.02373 |
| TC1300001519.mm.1 | <a href="#">Tcrg-C2</a>  | T-cell receptor gamma, constant 2                                     | 4.3 ± 0.04         | 4.5 ± 0.05  | 4.6 ± 0.06  | 4.58 ± 0.08 | 0.00773              | 0.18894  | 0.10402 |
| TC1300000140.mm.1 | <a href="#">Tcrg-V6</a>  | T cell receptor gamma, variable 6                                     | 4.5 ± 0.03         | 4.61 ± 0.04 | 4.83 ± 0.04 | 4.85 ± 0.04 | 7.2E-06              | 0.16936  | 0.28673 |



Supplemental Table I

| Probe Set ID      | Symbol                  | Annotations<br>Description                                   | Summary Statistics |              |              |              | 2 way ANOVA p-values |          |         |
|-------------------|-------------------------|--------------------------------------------------------------|--------------------|--------------|--------------|--------------|----------------------|----------|---------|
|                   |                         |                                                              | XY sh              | XY Or        | XX sh        | XX Or        | XY vs XX             | Sh vs Or | Intrxn  |
| TC0900003058.mm.1 | <a href="#">Tcta</a>    | T cell leukemia translocation altered gene                   | 7.47 ± 0.03        | 7.35 ± 0.02  | 7.48 ± 0.03  | 7.38 ± 0.04  | 0.35825              | 0.00573  | 0.96842 |
| TC0300002218.mm.1 | <a href="#">Tdo2</a>    | tryptophan 2,3-dioxygenase                                   | 5.29 ± 0.27        | 3.91 ± 0.18  | 4.44 ± 0.11  | 3.86 ± 0.06  | 0.09387              | 0.00053  | 0.1472  |
| TC0100003316.mm.1 | <a href="#">Tdrd5</a>   | tudor domain containing 5                                    | 4.11 ± 0.03        | 4.25 ± 0.05  | 4.14 ± 0.03  | 4.27 ± 0.06  | 0.52433              | 0.00613  | 0.8388  |
| TC0700001651.mm.1 | <a href="#">Tead1</a>   | TEA domain family member 1                                   | 8.08 ± 0.07        | 7.92 ± 0.03  | 8.04 ± 0.07  | 7.76 ± 0.06  | 0.23678              | 0.00767  | 0.19207 |
| TC1500000731.mm.1 | <a href="#">Tef</a>     | thyrotroph embryonic factor                                  | 7.12 ± 0.07        | 7.33 ± 0.07  | 6.36 ± 0.05  | 7.23 ± 0.05  | 3.9E-05              | 8E-07    | 0.00048 |
| TC1000001661.mm.1 | <a href="#">Tespa1</a>  | thymocyte expressed, positive selection associated 1         | 3.97 ± 0.07        | 4.36 ± 0.08  | 4.09 ± 0.05  | 4.32 ± 0.13  | 0.83089              | 0.00472  | 0.53105 |
| TC1100003928.mm.1 | <a href="#">Tex2</a>    | testis expressed gene 2                                      | 8.23 ± 0.05        | 8.02 ± 0.04  | 7.99 ± 0.04  | 8.11 ± 0.04  | 0.07641              | 0.23951  | 0.00178 |
| TC0800000126.mm.1 | <a href="#">Tfdp1</a>   | transcription factor Dp 1                                    | 8.44 ± 0.03        | 8.41 ± 0.04  | 8.34 ± 0.01  | 8.3 ± 0.04   | 0.00492              | 0.28548  | 0.94556 |
| TC0600001890.mm.1 | <a href="#">Tfec</a>    | transcription factor EC                                      | 4.73 ± 0.04        | 4.59 ± 0.03  | 4.7 ± 0.05   | 4.43 ± 0.04  | 0.049                | 0.00028  | 0.10123 |
| TC1500000488.mm.1 | <a href="#">Tg</a>      | thyroglobulin                                                | 5.5 ± 0.04         | 5.62 ± 0.03  | 5.83 ± 0.06  | 5.63 ± 0.01  | 0.00133              | 0.20979  | 0.0016  |
| TC1200002103.mm.1 | <a href="#">Tgfb3</a>   | transforming growth factor, beta 3                           | 10.22 ± 0.12       | 10.13 ± 0.05 | 10.47 ± 0.12 | 9.7 ± 0.14   | 0.63405              | 0.00368  | 0.00584 |
| TC0700004575.mm.1 | <a href="#">Th</a>      | tyrosine hydroxylase                                         | 9.43 ± 0.87        | 7.72 ± 0.5   | 6.5 ± 0.3    | 9.23 ± 0.31  | 0.38218              | 0.29112  | 0.00498 |
| TC0400004083.mm.1 | <a href="#">Thap3</a>   | THAP domain containing, apoptosis associated protein 3       | 6.51 ± 0.02        | 6.64 ± 0     | 6.66 ± 0.03  | 6.66 ± 0.04  | 0.00273              | 0.01414  | 0.02562 |
| TC0200001729.mm.1 | <a href="#">Thbs1</a>   | thrombospondin 1                                             | 9.06 ± 0.04        | 8.9 ± 0.14   | 9.06 ± 0.04  | 8.4 ± 0.11   | 0.01657              | 0.00042  | 0.01006 |
| TC1700001484.mm.1 | <a href="#">Thbs2</a>   | thrombospondin 2                                             | 8.11 ± 0.11        | 8.54 ± 0.05  | 8.48 ± 0.09  | 8.27 ± 0.09  | 0.52293              | 0.18815  | 0.0031  |
| TC0300000752.mm.1 | <a href="#">Thbs3</a>   | thrombospondin 3                                             | 7.31 ± 0.06        | 7.24 ± 0.02  | 7.31 ± 0.05  | 7.03 ± 0.02  | 0.05116              | 0.00257  | 0.02325 |
| TC0600002460.mm.1 | <a href="#">Thns12</a>  | threonine synthase-like 2 (bacterial)                        | 6.41 ± 0.01        | 6.47 ± 0.03  | 6.52 ± 0.01  | 6.48 ± 0.01  | 0.00107              | 0.55106  | 0.00317 |
| TC1100001580.mm.1 | <a href="#">Thra</a>    | thyroid hormone receptor alpha                               | 8.7 ± 0.01         | 8.69 ± 0.03  | 8.99 ± 0.05  | 8.74 ± 0.06  | 0.00055              | 0.00661  | 0.007   |
| TC1700002595.mm.1 | <a href="#">Thumpd2</a> | THUMP domain containing 2                                    | 5.78 ± 0.03        | 5.84 ± 0.03  | 5.85 ± 0.01  | 5.7 ± 0.02   | 0.08803              | 0.04851  | 0.00201 |
| TC1500000177.mm.1 | <a href="#">Tiaf2</a>   | TGF-beta1-induced anti-apoptotic factor 2                    | 4.31 ± 0.09        | 4.42 ± 0.03  | 4.07 ± 0.09  | 4.06 ± 0.08  | 0.00176              | 0.55106  | 0.53265 |
| TC1600002039.mm.1 | <a href="#">Tiam1</a>   | T cell lymphoma invasion and metastasis 1                    | 6.58 ± 0.03        | 6.73 ± 0.02  | 6.68 ± 0     | 6.77 ± 0.06  | 0.11708              | 0.00986  | 0.55139 |
| TC1100000484.mm.1 | <a href="#">Timd4</a>   | T cell immunoglobulin and mucin domain containing 4          | 6.22 ± 0.05        | 5.83 ± 0.08  | 6.21 ± 0.07  | 6.01 ± 0.03  | 0.15885              | 0.00019  | 0.12784 |
| TC0X00000218.mm.1 | <a href="#">Timp1</a>   | tissue inhibitor of metalloproteinase 1                      | 7.74 ± 0.14        | 7.38 ± 0.14  | 7.67 ± 0.08  | 6.87 ± 0.06  | 0.05175              | 0.00049  | 0.05757 |
| TC0600002948.mm.1 | <a href="#">Timp4</a>   | tissue inhibitor of metalloproteinase 4                      | 8.28 ± 0.14        | 7.71 ± 0.09  | 7.94 ± 0.05  | 7.35 ± 0.15  | 0.02471              | 0.00072  | 0.6479  |
| TC1900001273.mm.1 | <a href="#">Tjp2</a>    | tight junction protein 2                                     | 7.71 ± 0.04        | 7.83 ± 0.03  | 7.82 ± 0.02  | 7.75 ± 0.01  | 0.49583              | 0.27627  | 0.00488 |
| TC0X00001069.mm.1 | <a href="#">Tlr13</a>   | toll-like receptor 13                                        | 5.09 ± 0.09        | 4.67 ± 0.11  | 4.7 ± 0.09   | 4.3 ± 0.04   | 0.00166              | 0.00081  | 0.82909 |
| TC0100001754.mm.1 | <a href="#">Tlr5</a>    | toll-like receptor 5                                         | 6.6 ± 0.03         | 6.28 ± 0.05  | 6.64 ± 0.05  | 6.37 ± 0.1   | 0.36927              | 0.0002   | 0.54994 |
| TC0X00003360.mm.1 | <a href="#">Tlr7</a>    | toll-like receptor 7                                         | 6.18 ± 0.05        | 5.76 ± 0.07  | 5.95 ± 0.06  | 5.66 ± 0.18  | 0.16154              | 0.00446  | 0.62085 |
| TC0X00003359.mm.1 | <a href="#">Tlr8</a>    | toll-like receptor 8                                         | 6.06 ± 0.14        | 5.34 ± 0.05  | 5.65 ± 0.09  | 5.14 ± 0.14  | 0.04776              | 0.00032  | 0.64709 |
| TC0300002023.mm.1 | <a href="#">Tm4sf1</a>  | transmembrane 4 superfamily member 1                         | 10.21 ± 0.1        | 10.35 ± 0.08 | 10.66 ± 0.06 | 10.11 ± 0.14 | 0.25445              | 0.07861  | 0.00356 |
| TC0700001178.mm.1 | <a href="#">Tm6sf1</a>  | transmembrane 6 superfamily member 1                         | 7.75 ± 0.04        | 7.74 ± 0.02  | 7.77 ± 0.02  | 7.55 ± 0.05  | 0.03649              | 0.00651  | 0.00764 |
| TC0900003074.mm.1 | <a href="#">Tma7</a>    | translational machinery associated 7 homolog (S. cerevisiae) | 9.01 ± 0.04        | 8.83 ± 0.03  | 8.94 ± 0.04  | 8.86 ± 0.04  | 0.65473              | 0.00367  | 0.19457 |

Supplemental Table I

| Probe Set ID      | Symbol                    | Annotations<br>Description                                     | Summary Statistics |             |             |             | 2 way ANOVA p-values |          |         |
|-------------------|---------------------------|----------------------------------------------------------------|--------------------|-------------|-------------|-------------|----------------------|----------|---------|
|                   |                           |                                                                | XY sh              | XY Or       | XX sh       | XX Or       | XY vs XX             | Sh vs Or | Intrxn  |
| TC1500001013.mm.1 | <a href="#">Tmbim6</a>    | transmembrane BAX inhibitor motif containing 6                 | 9.05 ± 0.05        | 8.97 ± 0.05 | 8.97 ± 0.04 | 9.1 ± 0.01  | 0.95268              | 0.97451  | 0.00958 |
| TC0900001874.mm.1 | <a href="#">Tmed1</a>     | transmembrane emp24 domain containing 1                        | 7.25 ± 0.03        | 7.4 ± 0.02  | 7.44 ± 0.03 | 7.36 ± 0.02 | 0.03067              | 0.30318  | 0.00138 |
| TC0500002940.mm.1 | <a href="#">Tmed5</a>     | transmembrane emp24 protein transport domain containing 5      | 7.52 ± 0.12        | 7.37 ± 0.09 | 7.18 ± 0.16 | 7.81 ± 0.08 | 0.96713              | 0.16408  | 0.00271 |
| TC1200002117.mm.1 | <a href="#">Tmed8</a>     | transmembrane emp24 domain containing 8                        | 7.53 ± 0.05        | 7.5 ± 0.03  | 7.37 ± 0.02 | 7.32 ± 0.02 | 0.00112              | 0.51075  | 0.38401 |
| TC0400000535.mm.1 | <a href="#">Tmeff1</a>    | transmembrane protein with EGF-like and two follistatin-like d | 7.34 ± 0.24        | 6.83 ± 0.12 | 6.63 ± 0.12 | 7.19 ± 0.05 | 0.36694              | 0.78933  | 0.00807 |
| TC0100000364.mm.1 | <a href="#">Tmeff2</a>    | transmembrane protein with EGF-like and two follistatin-like d | 7.22 ± 0.12        | 6.8 ± 0.06  | 7.18 ± 0.07 | 6.82 ± 0.11 | 0.75182              | 0.00408  | 0.87524 |
| TC1100001395.mm.1 | <a href="#">Tmem100</a>   | transmembrane protein 100                                      | 8.06 ± 0.1         | 7.52 ± 0.12 | 8.04 ± 0.16 | 7.42 ± 0.1  | 0.64081              | 0.0004   | 0.70036 |
| TC1500000967.mm.1 | <a href="#">Tmem106c</a>  | transmembrane protein 106C                                     | 7.63 ± 0.04        | 7.66 ± 0.04 | 7.77 ± 0.02 | 7.77 ± 0.03 | 0.00424              | 0.79192  | 0.84992 |
| TC0500003404.mm.1 | <a href="#">Tmem120a</a>  | transmembrane protein 120A                                     | 8.31 ± 0.1         | 8.09 ± 0.09 | 7.85 ± 0.11 | 8.28 ± 0.05 | 0.08812              | 0.47945  | 0.00161 |
| TC0300000656.mm.1 | <a href="#">Tmem154</a>   | transmembrane protein 154                                      | 5.92 ± 0.03        | 5.95 ± 0    | 6.04 ± 0.05 | 5.86 ± 0.04 | 0.69989              | 0.04972  | 0.00669 |
| TC1300002506.mm.1 | <a href="#">Tmem171</a>   | transmembrane protein 171                                      | 4.92 ± 0.05        | 5.19 ± 0.04 | 4.99 ± 0.07 | 5.24 ± 0.12 | 0.29971              | 0.00236  | 0.80062 |
| TC0100003108.mm.1 | <a href="#">Tmem183a</a>  | transmembrane protein 183A                                     | 8.07 ± 0.05        | 7.88 ± 0.04 | 7.73 ± 0.04 | 7.83 ± 0.03 | 0.0005               | 0.27738  | 0.0037  |
| TC0200005516.mm.1 | <a href="#">Tmem189</a>   | transmembrane protein 189                                      | 8.33 ± 0.05        | 8.21 ± 0.03 | 8.12 ± 0.02 | 8.17 ± 0.01 | 0.00707              | 0.58737  | 0.07916 |
| TC1200001337.mm.1 | <a href="#">Tmem196</a>   | transmembrane protein 196                                      | 5.05 ± 0.02        | 5.01 ± 0.03 | 5.41 ± 0.13 | 5.08 ± 0.04 | 0.00809              | 0.01526  | 0.05841 |
| TC0200000407.mm.1 | <a href="#">Tmem210</a>   | transmembrane protein 210                                      | 5.75 ± 0.04        | 6.09 ± 0.06 | 5.88 ± 0.09 | 6.14 ± 0.1  | 0.23523              | 0.0012   | 0.61007 |
| TC1900001105.mm.1 | <a href="#">Tmem216</a>   | transmembrane protein 216                                      | 5.45 ± 0.03        | 5.38 ± 0.02 | 5.42 ± 0.01 | 5.35 ± 0.03 | 0.17096              | 0.00801  | 0.95738 |
| TC1200001974.mm.1 | <a href="#">Tmem229b</a>  | transmembrane protein 229B                                     | 6.26 ± 0.05        | 6.33 ± 0.02 | 6.18 ± 0.03 | 6.13 ± 0.04 | 0.00564              | 0.42563  | 0.04708 |
| TC1000000653.mm.1 | <a href="#">Tmem26</a>    | transmembrane protein 26                                       | 5.74 ± 0.05        | 5.88 ± 0.01 | 5.93 ± 0.07 | 5.79 ± 0.03 | 0.18854              | 0.80041  | 0.00348 |
| TC0X00003159.mm.1 | <a href="#">Tmem29</a>    | transmembrane protein 29                                       | 4.81 ± 0.03        | 4.85 ± 0.02 | 4.98 ± 0.04 | 4.87 ± 0    | 0.00866              | 0.18624  | 0.02863 |
| TC0300002838.mm.1 | <a href="#">Tmem56</a>    | transmembrane protein 56                                       | 5.7 ± 0.09         | 5.51 ± 0.08 | 5.45 ± 0.07 | 5.76 ± 0.06 | 0.88741              | 0.57139  | 0.005   |
| TC0400003747.mm.1 | <a href="#">Tmem57</a>    | transmembrane protein 57                                       | 8.5 ± 0.02         | 8.59 ± 0.01 | 8.38 ± 0.03 | 8.5 ± 0.05  | 0.00453              | 0.00215  | 0.77583 |
| TC1700002155.mm.1 | <a href="#">Tmem63b</a>   | transmembrane protein 63b                                      | 7.8 ± 0.04         | 7.72 ± 0.02 | 7.69 ± 0.03 | 7.88 ± 0.04 | 0.563                | 0.16091  | 0.00096 |
| TC0200003210.mm.1 | <a href="#">Tmem8c</a>    | transmembrane protein 8C                                       | 4.28 ± 0.02        | 4.56 ± 0.04 | 4.45 ± 0.07 | 4.55 ± 0.09 | 0.1948               | 0.00582  | 0.15935 |
| TC1100001209.mm.1 | <a href="#">Tmem98</a>    | transmembrane protein 98                                       | 7.62 ± 0.12        | 7.83 ± 0.02 | 7.89 ± 0.08 | 7.62 ± 0.04 | 0.54555              | 0.89343  | 0.00842 |
| TC1400002757.mm.1 | <a href="#">Tmtc4</a>     | transmembrane and tetra-tricopeptide repeat containing 4       | 6.14 ± 0.02        | 6.22 ± 0.01 | 6.27 ± 0.03 | 6.21 ± 0    | 0.02252              | 0.85371  | 0.00482 |
| TC1100001686.mm.1 | <a href="#">Tmub2</a>     | transmembrane and ubiquitin-like domain containing 2           | 7 ± 0.03           | 6.89 ± 0.01 | 6.97 ± 0    | 7 ± 0.01    | 0.05634              | 0.11578  | 0.00986 |
| TC1200001237.mm.1 | <a href="#">Tnfaip2</a>   | tumor necrosis factor, alpha-induced protein 2                 | 6.7 ± 0.04         | 6.71 ± 0.04 | 6.76 ± 0.02 | 6.48 ± 0.03 | 0.03784              | 0.00247  | 0.00102 |
| TC1100000774.mm.1 | <a href="#">Tnfrsf13b</a> | tumor necrosis factor receptor superfamily, member 13b         | 5.94 ± 0.01        | 6.14 ± 0.03 | 6.05 ± 0.04 | 6.18 ± 0.08 | 0.10246              | 0.00263  | 0.39873 |
| TC1500001939.mm.1 | <a href="#">Tnfrsf13c</a> | tumor necrosis factor receptor superfamily, member 13c         | 6.08 ± 0.08        | 6.61 ± 0.09 | 6.44 ± 0.14 | 6.76 ± 0.17 | 0.09925              | 0.0075   | 0.62755 |
| TC0600001459.mm.1 | <a href="#">Tnfrsf1a</a>  | tumor necrosis factor receptor superfamily, member 1a          | 8.63 ± 0.04        | 8.49 ± 0.04 | 8.6 ± 0.01  | 8.47 ± 0.03 | 0.40759              | 0.00159  | 0.64565 |
| TC0400003958.mm.1 | <a href="#">Tnfrsf8</a>   | tumor necrosis factor receptor superfamily, member 8           | 5.83 ± 0.02        | 5.97 ± 0.03 | 5.9 ± 0.03  | 6.04 ± 0.09 | 0.15494              | 0.00845  | 0.98819 |
| TC1600000448.mm.1 | <a href="#">Tnk2</a>      | tyrosine kinase, non-receptor, 2                               | 7.9 ± 0.03         | 7.97 ± 0.02 | 8.09 ± 0.03 | 8.02 ± 0.01 | 0.00043              | 0.8164   | 0.0131  |

Supplemental Table I

| Probe Set ID      | Symbol                         | Annotations<br>Description                               | Summary Statistics |              |              |              | 2 way ANOVA p-values |          |         |
|-------------------|--------------------------------|----------------------------------------------------------|--------------------|--------------|--------------|--------------|----------------------|----------|---------|
|                   |                                |                                                          | XY sh              | XY Or        | XX sh        | XX Or        | XY vs XX             | Sh vs Or | Intrxn  |
| TC0100001447.mm.1 | <a href="#">Tnr</a>            | tenascin R                                               | 7.34 ± 0.19        | 6.67 ± 0.07  | 7.82 ± 0.3   | 6.96 ± 0.15  | 0.04774              | 0.00301  | 0.49406 |
| TC1500001931.mm.1 | <a href="#">Tob2</a>           | transducer of ERBB2, 2                                   | 6.15 ± 0.09        | 6.4 ± 0.02   | 6.08 ± 0.05  | 6.39 ± 0.09  | 0.49957              | 0.00242  | 0.58121 |
| TC0400002436.mm.1 | <a href="#">Topors</a>         | topoisomerase I binding, arginine/serine-rich            | 7.58 ± 0.03        | 7.76 ± 0.05  | 7.67 ± 0.02  | 7.61 ± 0.02  | 0.406                | 0.10023  | 0.0023  |
| TC0200003132.mm.1 | <a href="#">Tor4a</a>          | torsin family 4, member A                                | 6.18 ± 0.02        | 6.18 ± 0.06  | 6.41 ± 0.04  | 6.25 ± 0.02  | 0.00104              | 0.06118  | 0.04408 |
| TC0800002674.mm.1 | <a href="#">Tox3</a>           | TOX high mobility group box family member 3              | 5.06 ± 0.02        | 5.16 ± 0.03  | 5.05 ± 0.02  | 5.14 ± 0.04  | 0.54032              | 0.00893  | 0.88538 |
| TC0400002529.mm.1 | <a href="#">Tpm2</a>           | tropomyosin 2, beta                                      | 10.19 ± 0.1        | 10.34 ± 0.05 | 10.41 ± 0.07 | 10.1 ± 0.08  | 0.91536              | 0.45841  | 0.00803 |
| TC0800000814.mm.1 | <a href="#">Tpm4</a>           | tropomyosin 4                                            | 10.35 ± 0.06       | 10.25 ± 0.05 | 10.24 ± 0.02 | 10.01 ± 0.04 | 0.00583              | 0.00984  | 0.09358 |
| TC1300000893.mm.1 | <a href="#">Tppp</a>           | tubulin polymerization promoting protein                 | 7.26 ± 0.12        | 6.99 ± 0.05  | 6.81 ± 0.12  | 7.3 ± 0.13   | 0.44816              | 0.41915  | 0.00392 |
| TC0500001522.mm.1 | <a href="#">Tpst1</a>          | protein-tyrosine sulfotransferase 1                      | 7.35 ± 0.05        | 7.44 ± 0.02  | 7.48 ± 0.03  | 7.35 ± 0.04  | 0.43983              | 0.72916  | 0.00665 |
| TC0600002240.mm.1 | <a href="#">Tra2a</a>          | transformer 2 alpha homolog (Drosophila)                 | 8.03 ± 0.03        | 8.12 ± 0.07  | 7.81 ± 0.1   | 7.9 ± 0.07   | 0.00846              | 0.17861  | 0.92499 |
| TC0400001209.mm.1 | <a href="#">Trabd2b</a>        | TraB domain containing 2B                                | 8.19 ± 0.1         | 8.46 ± 0.04  | 8.65 ± 0.1   | 8.27 ± 0.14  | 0.23606              | 0.62191  | 0.00901 |
| TC0200003157.mm.1 | <a href="#">Traf2</a>          | TNF receptor-associated factor 2                         | 7.17 ± 0.05        | 7.28 ± 0.01  | 7.4 ± 0.05   | 7.22 ± 0.03  | 0.09386              | 0.36484  | 0.00554 |
| TC0100003835.mm.1 | <a href="#">Traf3ip3</a>       | TRAF3 interacting protein 3                              | 4.48 ± 0.03        | 4.68 ± 0.02  | 4.54 ± 0.04  | 4.65 ± 0.06  | 0.95666              | 0.00165  | 0.33714 |
| TC1400000737.mm.1 | <a href="#">Traj8</a>          | T cell receptor alpha joining 8                          | 5.32 ± 0.12        | 5.81 ± 0.09  | 5.48 ± 0.03  | 5.93 ± 0.19  | 0.29045              | 0.0026   | 0.93267 |
| TC1400000613.mm.1 | <a href="#">Trav1</a>          | T cell receptor alpha variable 1                         | 7.12 ± 0.01        | 7.32 ± 0.03  | 7.25 ± 0.03  | 7.42 ± 0.09  | 0.02589              | 0.00125  | 0.6664  |
| TC1400000700.mm.1 | <a href="#">Trav12-1</a>       | Trav12-1 T cell receptor alpha variable 12-1             | 5.21 ± 0.08        | 5.53 ± 0.05  | 5.35 ± 0.13  | 5.71 ± 0.11  | 0.16322              | 0.00629  | 0.67642 |
| TC1400000702.mm.1 | <a href="#">Trav12-2</a>       | T cell receptor alpha variable 12-2                      | 4.5 ± 0.05         | 4.82 ± 0.07  | 4.55 ± 0.07  | 4.84 ± 0.17  | 0.82281              | 0.00912  | 0.94085 |
| TC1400000646.mm.1 | <a href="#">Trav12d-3</a>      | T cell receptor alpha variable 12D-3                     | 4.99 ± 0.07        | 5.49 ± 0.06  | 5.06 ± 0.07  | 5.2 ± 0.06   | 0.07586              | 0.00087  | 0.03964 |
| TC1400000677.mm.1 | <a href="#">Trav12n-3</a>      | T cell receptor alpha variable 12N-3                     | 4.98 ± 0.1         | 5.48 ± 0.06  | 5.03 ± 0.07  | 5.2 ± 0.06   | 0.09301              | 0.00231  | 0.12194 |
| TC1400002817.mm.1 | <a href="#">Trav13-3</a>       | T cell receptor alpha variable 13-3                      | 6.4 ± 0.02         | 6.56 ± 0.04  | 6.44 ± 0.05  | 6.56 ± 0.05  | 0.46577              | 0.00381  | 0.58331 |
| TC1400000635.mm.1 | <a href="#">Trav13d-1</a>      | T cell receptor alpha variable 13D-1                     | 6.46 ± 0.03        | 6.68 ± 0.05  | 6.52 ± 0.06  | 6.72 ± 0.08  | 0.38656              | 0.00213  | 0.84523 |
| TC1400000656.mm.1 | <a href="#">Trav13d-4</a>      | T cell receptor alpha variable 13D-4                     | 5.54 ± 0.08        | 5.92 ± 0.03  | 5.51 ± 0.12  | 5.69 ± 0.07  | 0.06756              | 0.00769  | 0.42193 |
| TC1400000665.mm.1 | <a href="#">Trav13n-1</a>      | Trav13n-1 T cell receptor alpha variable 13N-1           | 5.99 ± 0.06        | 6.21 ± 0.05  | 5.99 ± 0.06  | 6.19 ± 0.09  | 0.83689              | 0.00407  | 0.68841 |
| TC1400002802.mm.1 | <a href="#">Trav14d-2</a>      | Trav14d-2 T cell receptor alpha variable 14D-2           | 5.04 ± 0.03        | 5.38 ± 0.09  | 5.18 ± 0.05  | 5.51 ± 0.14  | 0.12009              | 0.00116  | 0.91265 |
| TC1400002820.mm.1 | <a href="#">Trav14n-2</a>      | Trav14n-2 T cell receptor alpha variable 14N-2           | 5.04 ± 0.03        | 5.38 ± 0.09  | 5.18 ± 0.05  | 5.51 ± 0.14  | 0.12009              | 0.00116  | 0.91265 |
| TC1400002830.mm.1 | <a href="#">Trav15-1-dv6-1</a> | Trav15-1-dv6-1 T cell receptor alpha variable 15-1-DV6-1 | 6.44 ± 0.04        | 6.57 ± 0.05  | 6.48 ± 0.04  | 6.64 ± 0.04  | 0.21111              | 0.00509  | 0.7817  |
| TC1400000622.mm.1 | <a href="#">Trav4d-2</a>       | T cell receptor alpha variable 4D-2                      | 6.86 ± 0.04        | 7.09 ± 0.04  | 6.95 ± 0.06  | 7.09 ± 0.11  | 0.38554              | 0.00806  | 0.35649 |
| TC1400000684.mm.1 | <a href="#">Trav6n-7</a>       | T cell receptor alpha variable 6N-7                      | 4.19 ± 0.02        | 4.4 ± 0.06   | 4.21 ± 0.05  | 4.42 ± 0.1   | 0.75974              | 0.00405  | 0.92902 |
| TC1400000705.mm.1 | <a href="#">Trav9-4</a>        | T cell receptor alpha variable 9-4                       | 4.33 ± 0.05        | 4.71 ± 0.07  | 4.6 ± 0.1    | 4.8 ± 0.11   | 0.04484              | 0.00342  | 0.25547 |
| TC0600003496.mm.1 | <a href="#">Trbd1</a>          | T cell receptor beta, D region 1                         | 5.27 ± 0.05        | 5.93 ± 0.18  | 5.35 ± 0.07  | 5.87 ± 0.21  | 0.92651              | 0.00102  | 0.71154 |
| TC0600000417.mm.1 | <a href="#">Trbv1</a>          | T cell receptor beta, variable 1                         | 5.12 ± 0.07        | 5.47 ± 0.05  | 5.23 ± 0.09  | 5.43 ± 0.07  | 0.7253               | 0.00307  | 0.41938 |
| TC0600000423.mm.1 | <a href="#">Trbv12-1</a>       | T cell receptor beta, variable 12-1                      | 4.2 ± 0.02         | 4.64 ± 0.1   | 4.24 ± 0.07  | 4.5 ± 0.13   | 0.5315               | 0.00119  | 0.31637 |

Supplemental Table I

| Probe Set ID      | Symbol                   | Annotations<br>Description                             | Summary Statistics |             |             |             | 2 way ANOVA p-values |          |         |
|-------------------|--------------------------|--------------------------------------------------------|--------------------|-------------|-------------|-------------|----------------------|----------|---------|
|                   |                          |                                                        | XY sh              | XY Or       | XX sh       | XX Or       | XY vs XX             | Sh vs Or | Intrxn  |
| TC0600003497.mm.1 | <a href="#">Trbv12-2</a> | T cell receptor beta, variable 12-2                    | 5.08 ± 0.08        | 5.42 ± 0.07 | 4.93 ± 0.11 | 5.45 ± 0.18 | 0.56385              | 0.00238  | 0.40879 |
| TC0600003493.mm.1 | <a href="#">Trbv13-1</a> | T cell receptor beta, variable 13-1                    | 4.39 ± 0.11        | 4.84 ± 0.07 | 4.5 ± 0.08  | 4.82 ± 0.2  | 0.71276              | 0.0085   | 0.5598  |
| TC0600000426.mm.1 | <a href="#">Trbv14</a>   | T cell receptor beta, variable 14                      | 5.36 ± 0.12        | 5.88 ± 0.02 | 5.6 ± 0.14  | 5.87 ± 0.1  | 0.44738              | 0.00518  | 0.39498 |
| TC0600000427.mm.1 | <a href="#">Trbv15</a>   | T cell receptor beta, variable 15                      | 4.47 ± 0.09        | 4.71 ± 0.17 | 4.41 ± 0.06 | 5.01 ± 0.13 | 0.4039               | 0.00516  | 0.11782 |
| TC0600000428.mm.1 | <a href="#">Trbv16</a>   | T cell receptor beta, variable 16                      | 4.44 ± 0.06        | 4.89 ± 0.09 | 4.65 ± 0.06 | 4.78 ± 0.07 | 0.78405              | 0.00251  | 0.0874  |
| TC0600000419.mm.1 | <a href="#">Trbv2</a>    | T cell receptor beta, variable 2                       | 5.18 ± 0.04        | 5.67 ± 0.12 | 5.25 ± 0.09 | 5.52 ± 0.12 | 0.53017              | 0.00221  | 0.33911 |
| TC0600000433.mm.1 | <a href="#">Trbv24</a>   | Trbv24 T cell receptor beta, variable 24               | 4.99 ± 0.07        | 5.3 ± 0.05  | 5.16 ± 0.07 | 5.3 ± 0.06  | 0.27933              | 0.00577  | 0.2584  |
| TC0600002157.mm.1 | <a href="#">Trbv31</a>   | T cell receptor beta, variable 31                      | 4.98 ± 0.07        | 5.43 ± 0.05 | 5.05 ± 0.08 | 5.39 ± 0.15 | 0.86448              | 0.00102  | 0.56734 |
| TC1400000715.mm.1 | <a href="#">Trdv4</a>    | T cell receptor delta variable 4                       | 4.11 ± 0.03        | 4.28 ± 0.04 | 4.4 ± 0.06  | 4.24 ± 0.04 | 0.01965              | 0.85083  | 0.0031  |
| TC1700000933.mm.1 | <a href="#">Trem3</a>    | triggering receptor expressed on myeloid cells 3       | 4.78 ± 0.03        | 4.94 ± 0.02 | 4.81 ± 0.04 | 4.91 ± 0.05 | 0.78108              | 0.00379  | 0.56466 |
| TC1700000935.mm.1 | <a href="#">Trem12</a>   | triggering receptor expressed on myeloid cells-like 2  | 5.11 ± 0.05        | 5.37 ± 0.03 | 5.29 ± 0.05 | 5.44 ± 0.06 | 0.02907              | 0.001    | 0.33725 |
| TC1300002762.mm.1 | <a href="#">Trgj1</a>    | T cell receptor gamma joining 1                        | 5.5 ± 0.08         | 5.71 ± 0.09 | 6.08 ± 0.1  | 6 ± 0.24    | 0.00773              | 0.64002  | 0.29433 |
| TC0600002305.mm.1 | <a href="#">Tril</a>     | TLR4 interactor with leucine-rich repeats              | 6.91 ± 0.13        | 6.45 ± 0.04 | 6.99 ± 0.08 | 6.7 ± 0.16  | 0.19268              | 0.00718  | 0.48947 |
| TC0700000155.mm.1 | <a href="#">Trim28</a>   | tripartite motif-containing 28                         | 8.05 ± 0.04        | 8.15 ± 0.01 | 8.13 ± 0.03 | 8.01 ± 0.05 | 0.58584              | 0.84252  | 0.00754 |
| TC0200004213.mm.1 | <a href="#">Trim44</a>   | tripartite motif-containing 44                         | 9.1 ± 0.02         | 9 ± 0.02    | 9.09 ± 0.01 | 9.03 ± 0.03 | 0.71829              | 0.00378  | 0.40327 |
| TC1100004301.mm.1 | <a href="#">Trim47</a>   | tripartite motif-containing 47                         | 7.66 ± 0.08        | 7.85 ± 0.04 | 7.86 ± 0.03 | 7.76 ± 0.01 | 0.22577              | 0.2776   | 0.00908 |
| TC0500003433.mm.1 | <a href="#">Trim56</a>   | tripartite motif-containing 56                         | 7.62 ± 0.03        | 7.76 ± 0.03 | 7.73 ± 0.02 | 7.63 ± 0.06 | 0.88182              | 0.56125  | 0.00397 |
| TC1200001243.mm.1 | <a href="#">Trmt61a</a>  | tRNA methyltransferase 61A                             | 7.28 ± 0.02        | 7.36 ± 0.03 | 7.34 ± 0.02 | 7.27 ± 0.02 | 0.61729              | 0.80578  | 0.00795 |
| TC0200001448.mm.1 | <a href="#">Trp53i11</a> | transformation related protein 53 inducible protein 11 | 8.35 ± 0.11        | 8.61 ± 0.05 | 8.82 ± 0.04 | 8.89 ± 0.04 | 0.00056              | 0.1052   | 0.41474 |
| TC0200002574.mm.1 | <a href="#">Trp53rk</a>  | transformation related protein 53 regulating kinase    | 5.72 ± 0.02        | 5.88 ± 0.03 | 5.78 ± 0.02 | 5.89 ± 0.08 | 0.36851              | 0.005    | 0.50608 |
| TC1500001491.mm.1 | <a href="#">Trps1</a>    | trichorhinophalangeal syndrome I (human)               | 6.65 ± 0.04        | 6.61 ± 0.02 | 6.7 ± 0.03  | 6.56 ± 0.04 | 0.7033               | 0.0091   | 0.28315 |
| TC0X00003075.mm.1 | <a href="#">Tsc22d3</a>  | TSC22 domain family, member 3                          | 7.41 ± 0.05        | 7.44 ± 0.12 | 6.97 ± 0.04 | 7.23 ± 0.06 | 0.00101              | 0.03642  | 0.22551 |
| TC0700000018.mm.1 | <a href="#">Tsen34</a>   | tRNA splicing endonuclease 34 homolog (S. cerevisiae)  | 7.12 ± 0.02        | 7.18 ± 0    | 7.23 ± 0.02 | 7.22 ± 0.03 | 0.0038               | 0.23886  | 0.16027 |
| TC1800001700.mm.1 | <a href="#">Tshz1</a>    | teashirt zinc finger family member 1                   | 8.29 ± 0.05        | 8.39 ± 0.04 | 8.47 ± 0.05 | 8.21 ± 0.05 | 0.99243              | 0.13651  | 0.00203 |
| TC0200002632.mm.1 | <a href="#">Tshz2</a>    | teashirt zinc finger family member 2                   | 8.73 ± 0.05        | 8.43 ± 0.09 | 8.79 ± 0.04 | 8.64 ± 0.09 | 0.0767               | 0.00529  | 0.29843 |
| TC0X00003398.mm.1 | <a href="#">Tsix</a>     | X (inactive)-specific transcript, antisense            | 3.92 ± 0.04        | 4.07 ± 0.05 | 4.71 ± 0.05 | 4.76 ± 0.12 | 9.1E-08              | 0.24097  | 0.61976 |
| TC0600001500.mm.1 | <a href="#">Tspan11</a>  | tetraspanin 11                                         | 8.06 ± 0.13        | 7.9 ± 0.02  | 8.17 ± 0.07 | 7.74 ± 0.02 | 0.98641              | 0.00652  | 0.07524 |
| TC1000003096.mm.1 | <a href="#">Tspan31</a>  | tetraspanin 31                                         | 10.12 ± 0.04       | 9.99 ± 0.04 | 9.94 ± 0.02 | 9.91 ± 0.05 | 0.00602              | 0.09362  | 0.34247 |
| TC0700002056.mm.1 | <a href="#">Tspan4</a>   | tetraspanin 4                                          | 8.02 ± 0.08        | 8.32 ± 0.07 | 7.8 ± 0.01  | 8.21 ± 0.02 | 0.04631              | 3.3E-05  | 0.60286 |
| TC1000001333.mm.1 | <a href="#">Tspan8</a>   | tetraspanin 8                                          | 5.99 ± 0.62        | 4.85 ± 0.3  | 4.12 ± 0.03 | 5.9 ± 0.37  | 0.48717              | 0.36018  | 0.00815 |
| TC0600003185.mm.1 | <a href="#">Tspan9</a>   | tetraspanin 9                                          | 8.16 ± 0.1         | 8.04 ± 0.04 | 8.35 ± 0.06 | 7.81 ± 0.05 | 0.93495              | 0.00142  | 0.00924 |
| TC1600000227.mm.1 | <a href="#">Tssk1</a>    | testis-specific serine kinase 1                        | 3.78 ± 0.08        | 4.42 ± 0.04 | 4.18 ± 0.17 | 4.35 ± 0.11 | 0.18534              | 0.00285  | 0.06248 |

Supplemental Table I

| Probe Set ID      | Symbol                    | Annotations<br>Description                                      | Summary Statistics |              |              |             | 2 way ANOVA p-values |          |         |
|-------------------|---------------------------|-----------------------------------------------------------------|--------------------|--------------|--------------|-------------|----------------------|----------|---------|
|                   |                           |                                                                 | XY sh              | XY Or        | XX sh        | XX Or       | XY vs XX             | Sh vs Or | Intrxn  |
| TC020000499.mm.1  | <a href="#">Ttf1</a>      | transcription termination factor, RNA polymerase I              | 6.17 ± 0.02        | 6.23 ± 0.02  | 6.24 ± 0.02  | 6.17 ± 0.02 | 0.81686              | 0.78441  | 0.00423 |
| TC0100002604.mm.1 | <a href="#">Tuba4a</a>    | tubulin, alpha 4A                                               | 7.94 ± 0.36        | 7.12 ± 0.12  | 6.8 ± 0.11   | 7.67 ± 0.15 | 0.30149              | 0.81885  | 0.00549 |
| TC0800001522.mm.1 | <a href="#">Tubb3</a>     | tubulin, beta 3 class III                                       | 8.92 ± 0.68        | 7.69 ± 0.27  | 6.81 ± 0.16  | 8.76 ± 0.23 | 0.40252              | 0.29206  | 0.00627 |
| TC1000000324.mm.1 | <a href="#">Tubc1</a>     | epsilon-tubulin 1                                               | 4.37 ± 0.03        | 4.57 ± 0.05  | 4.41 ± 0.04  | 4.56 ± 0.05 | 0.81777              | 0.00092  | 0.57254 |
| TC0900001374.mm.1 | <a href="#">Tusc2</a>     | tumor suppressor candidate 2                                    | 7.66 ± 0.03        | 7.53 ± 0.02  | 7.49 ± 0.06  | 7.7 ± 0.07  | 0.92442              | 0.44547  | 0.00293 |
| TC0500002579.mm.1 | <a href="#">Txk</a>       | TXK tyrosine kinase                                             | 4.29 ± 0.03        | 4.43 ± 0.02  | 4.3 ± 0.05   | 4.44 ± 0.04 | 0.66635              | 0.00212  | 0.82181 |
| TC0X00003308.mm.1 | <a href="#">Txlng</a>     | taxilin gamma                                                   | 6.55 ± 0.09        | 6.3 ± 0.08   | 6.17 ± 0.1   | 6.39 ± 0.02 | 0.04865              | 0.61778  | 0.00618 |
| TC0800001297.mm.1 | <a href="#">Txnl4b</a>    | thioredoxin-like 4B                                             | 6.82 ± 0.08        | 6.67 ± 0.07  | 6.74 ± 0.07  | 6.96 ± 0.03 | 0.31704              | 0.949    | 0.0087  |
| TC0100003507.mm.1 | <a href="#">Uap1</a>      | UDP-N-acetylglucosamine pyrophosphorylase 1                     | 8.03 ± 0.06        | 7.71 ± 0.07  | 7.66 ± 0.03  | 7.62 ± 0.04 | 0.00124              | 0.00711  | 0.02518 |
| TC1700000531.mm.1 | <a href="#">Ubash3a</a>   | ubiquitin associated and SH3 domain containing, A               | 5.28 ± 0.03        | 5.51 ± 0.05  | 5.34 ± 0.05  | 5.51 ± 0.07 | 0.57161              | 0.0017   | 0.56844 |
| TC0500003273.mm.1 | <a href="#">Ubc</a>       | ubiquitin C                                                     | 12.9 ± 0.02        | 12.92 ± 0.01 | 12.97 ± 0.02 | 13 ± 0.01   | 0.00132              | 0.16003  | 0.59616 |
| TC1100002706.mm.1 | <a href="#">Ube2b</a>     | ubiquitin-conjugating enzyme E2B                                | 7.54 ± 0.04        | 7.49 ± 0.03  | 7.35 ± 0.04  | 7.45 ± 0.03 | 0.00566              | 0.6387   | 0.0302  |
| TC0700003365.mm.1 | <a href="#">Ube2nl</a>    | ubiquitin-conjugating enzyme E2N-like                           | 7.64 ± 0.03        | 7.57 ± 0.08  | 7.49 ± 0.01  | 7.37 ± 0.06 | 0.00744              | 0.12172  | 0.50136 |
| TC0400000358.mm.1 | <a href="#">Ube2r2</a>    | ubiquitin-conjugating enzyme E2R 2                              | 8.76 ± 0.03        | 8.7 ± 0.02   | 8.79 ± 0.01  | 8.68 ± 0.03 | 0.90711              | 0.00593  | 0.34289 |
| TC0900002186.mm.1 | <a href="#">Ube4a</a>     | ubiquitination factor E4A, UFD2 homolog (S. cerevisiae)         | 8 ± 0.05           | 7.81 ± 0.03  | 7.76 ± 0.06  | 7.87 ± 0.03 | 0.04049              | 0.27555  | 0.00408 |
| TC0400004039.mm.1 | <a href="#">Ube4b</a>     | ubiquitination factor E4B, UFD2 homolog (S. cerevisiae)         | 8.78 ± 0.02        | 8.71 ± 0.01  | 8.68 ± 0.03  | 8.73 ± 0.02 | 0.03608              | 0.65774  | 0.00798 |
| TC0700001749.mm.1 | <a href="#">Ubfd1</a>     | ubiquitin family domain containing 1                            | 7.14 ± 0.03        | 7.09 ± 0.02  | 7.03 ± 0.02  | 7 ± 0.04    | 0.00549              | 0.29046  | 0.94724 |
| TC1700002199.mm.1 | <a href="#">Ubr2</a>      | ubiquitin protein ligase E3 component n-recogin 2               | 8.55 ± 0.03        | 8.58 ± 0.01  | 8.46 ± 0.03  | 8.48 ± 0.04 | 0.00749              | 0.40909  | 0.89421 |
| TC0500002174.mm.1 | <a href="#">Ucn</a>       | urocortin                                                       | 6.03 ± 0.02        | 6.35 ± 0.08  | 6.16 ± 0.08  | 6.33 ± 0.12 | 0.56961              | 0.00926  | 0.41032 |
| TC1000001089.mm.1 | <a href="#">Uhrf1bp1l</a> | UHRF1 (ICBP90) binding protein 1-like                           | 8.85 ± 0.08        | 8.68 ± 0.02  | 8.56 ± 0.03  | 8.41 ± 0.06 | 0.00067              | 0.03758  | 0.864   |
| TC1100001158.mm.1 | <a href="#">Unc119</a>    | unc-119 homolog (C. elegans)                                    | 6.95 ± 0.05        | 7.09 ± 0.03  | 7.19 ± 0.01  | 7.2 ± 0.05  | 0.0015               | 0.12689  | 0.20099 |
| TC0500003089.mm.1 | <a href="#">Unc119b</a>   | unc-119 homolog B (C. elegans)                                  | 7.81 ± 0.04        | 7.83 ± 0.02  | 8.06 ± 0.04  | 7.83 ± 0.03 | 0.00391              | 0.00454  | 0.00397 |
| TC0800000132.mm.1 | <a href="#">Upf3a</a>     | UPF3 regulator of nonsense transcripts homolog A (yeast)        | 7.24 ± 0.01        | 7.34 ± 0.02  | 7.34 ± 0.03  | 7.29 ± 0.02 | 0.48317              | 0.3637   | 0.00609 |
| TC0800000783.mm.1 | <a href="#">Use1</a>      | unconventional SNARE in the ER 1 homolog (S. cerevisiae)        | 7.39 ± 0.03        | 7.51 ± 0.01  | 7.54 ± 0.01  | 7.54 ± 0.02 | 0.0019               | 0.01974  | 0.02739 |
| TC0700001492.mm.1 | <a href="#">Usp17lc</a>   | ubiquitin specific peptidase 17-like C                          | 4.37 ± 0.08        | 4.54 ± 0.06  | 4.45 ± 0.03  | 4.72 ± 0.11 | 0.06597              | 0.00652  | 0.75069 |
| TC0900000497.mm.1 | <a href="#">Usp2</a>      | ubiquitin specific peptidase 2                                  | 7.04 ± 0.04        | 7.16 ± 0.06  | 6.87 ± 0.03  | 7.12 ± 0.09 | 0.08006              | 0.00999  | 0.29627 |
| TC0Y00000233.mm.1 | <a href="#">Uty</a>       | ubiquitously transcribed tetratricopeptide repeat gene, Y chro  | 6.25 ± 0.05        | 6.07 ± 0.07  | 3.97 ± 0.01  | 3.92 ± 0.01 | 2.2E-16              | 0.0121   | 0.09928 |
| TC0700002474.mm.1 | <a href="#">Vasp</a>      | vasodilator-stimulated phosphoprotein                           | 7.8 ± 0.07         | 7.98 ± 0.02  | 8 ± 0.05     | 7.84 ± 0    | 0.49724              | 0.85295  | 0.00238 |
| TC0800001360.mm.1 | <a href="#">Vat1l</a>     | vesicle amine transport protein 1 homolog-like (T. californica) | 8.08 ± 0.63        | 6.66 ± 0.27  | 6.14 ± 0.15  | 7.67 ± 0.24 | 0.43828              | 0.68113  | 0.00717 |
| TC0600000935.mm.1 | <a href="#">Vax2</a>      | ventral anterior homeobox containing gene 2                     | 6.27 ± 0.02        | 6.45 ± 0.05  | 6.35 ± 0.05  | 6.46 ± 0.06 | 0.39409              | 0.00912  | 0.5042  |
| TC0600000933.mm.1 | <a href="#">Vax2os1_2</a> | Vax2os1 conserved region 2                                      | 5.66 ± 0.05        | 5.85 ± 0.03  | 5.69 ± 0.06  | 5.95 ± 0.11 | 0.31274              | 0.0047   | 0.71275 |
| TC0300002802.mm.1 | <a href="#">Vcam1</a>     | vascular cell adhesion molecule 1                               | 9.11 ± 0.1         | 8.98 ± 0.08  | 8.93 ± 0.04  | 8.56 ± 0.08 | 0.00834              | 0.02276  | 0.07729 |

Supplemental Table I

| Probe Set ID      | Symbol                 | Annotations<br>Description                                     | Summary Statistics |             |             |             | 2 way ANOVA p-values |          |         |
|-------------------|------------------------|----------------------------------------------------------------|--------------------|-------------|-------------|-------------|----------------------|----------|---------|
|                   |                        |                                                                | XY sh              | XY Or       | XX sh       | XX Or       | XY vs XX             | Sh vs Or | Intrxn  |
| TC1300002392.mm.1 | <a href="#">Vcan</a>   | versican                                                       | 7.82 ± 0.15        | 7.59 ± 0.03 | 7.73 ± 0.12 | 7.23 ± 0.06 | 0.0956               | 0.00755  | 0.16251 |
| TC1600000797.mm.1 | <a href="#">Vgll3</a>  | vestigial like 3 (Drosophila)                                  | 8.59 ± 0.14        | 8.53 ± 0.02 | 9.06 ± 0.1  | 8.3 ± 0.12  | 0.19545              | 0.00433  | 0.00396 |
| TC1700001187.mm.1 | <a href="#">Vit</a>    | vitrin                                                         | 8.03 ± 0.09        | 7.67 ± 0.06 | 8.11 ± 0.06 | 7.71 ± 0.1  | 0.31148              | 0.00057  | 0.59644 |
| TC1700002334.mm.1 | <a href="#">Vmac</a>   | vimentin-type intermediate filament associated coiled-coil pro | 6.59 ± 0.03        | 6.71 ± 0.02 | 6.81 ± 0.04 | 6.78 ± 0.04 | 0.00059              | 0.19059  | 0.03177 |
| TC1100003450.mm.1 | <a href="#">Vmp1</a>   | vacuole membrane protein 1                                     | 6.95 ± 0.05        | 6.76 ± 0.07 | 6.68 ± 0.04 | 6.66 ± 0.03 | 0.00157              | 0.02746  | 0.05515 |
| TC1000000193.mm.1 | <a href="#">Vnn1</a>   | vanin 1                                                        | 5.81 ± 0.12        | 5.56 ± 0.03 | 5.14 ± 0.03 | 5.54 ± 0.07 | 0.00184              | 0.19092  | 0.00332 |
| TC0500001389.mm.1 | <a href="#">Vps29</a>  | vacuolar protein sorting 29 (S. pombe)                         | 7.04 ± 0.02        | 6.96 ± 0.04 | 6.97 ± 0.01 | 6.87 ± 0.03 | 0.00908              | 0.00583  | 0.58116 |
| TC0500003236.mm.1 | <a href="#">Vps33a</a> | vacuolar protein sorting 33A (yeast)                           | 8.33 ± 0.05        | 8.22 ± 0.06 | 8.19 ± 0.05 | 8.36 ± 0.04 | 0.85339              | 0.81812  | 0.00966 |
| TC0800000475.mm.1 | <a href="#">Vps37a</a> | vacuolar protein sorting 37A (yeast)                           | 8.37 ± 0.04        | 8.25 ± 0.02 | 8.47 ± 0.05 | 8.21 ± 0.11 | 0.70199              | 0.00757  | 0.32633 |
| TC0500003245.mm.1 | <a href="#">Vps37b</a> | vacuolar protein sorting 37B (yeast)                           | 7.38 ± 0.08        | 7.47 ± 0.09 | 7.74 ± 0.02 | 7.42 ± 0.01 | 0.03137              | 0.13349  | 0.00801 |
| TC1700000604.mm.1 | <a href="#">Vps52</a>  | vacuolar protein sorting 52 (yeast)                            | 7.32 ± 0           | 7.31 ± 0.01 | 7.37 ± 0.02 | 7.31 ± 0.01 | 0.03878              | 0.00321  | 0.07561 |
| TC0700000720.mm.1 | <a href="#">Vstm2b</a> | V-set and transmembrane domain containing 2B                   | 6.84 ± 0.08        | 7.23 ± 0.03 | 7.22 ± 0.12 | 7.01 ± 0.03 | 0.37643              | 0.3274   | 0.00231 |
| TC1200000074.mm.1 | <a href="#">Wdr35</a>  | WD repeat domain 35                                            | 7.28 ± 0.04        | 7.19 ± 0.03 | 7.38 ± 0.07 | 7.05 ± 0.1  | 0.82609              | 0.00803  | 0.07071 |
| TC0500001412.mm.1 | <a href="#">Wdr66</a>  | WD repeat domain 66                                            | 5.55 ± 0.02        | 5.6 ± 0     | 5.64 ± 0.02 | 5.58 ± 0.02 | 0.04164              | 0.82605  | 0.00597 |
| TC1900000152.mm.1 | <a href="#">Wdr74</a>  | WD repeat domain 74                                            | 8.37 ± 0.04        | 8.29 ± 0.06 | 8.17 ± 0.02 | 8.1 ± 0.09  | 0.00347              | 0.1531   | 0.84484 |
| TC0100000351.mm.1 | <a href="#">Wdr75</a>  | WD repeat domain 75                                            | 7.08 ± 0.05        | 6.99 ± 0.03 | 7.07 ± 0.03 | 6.9 ± 0.06  | 0.18729              | 0.00688  | 0.57385 |
| TC0200000392.mm.1 | <a href="#">Wdr85</a>  | WD repeat domain 85                                            | 6.52 ± 0.05        | 6.6 ± 0     | 6.72 ± 0.04 | 6.56 ± 0.05 | 0.04325              | 0.57356  | 0.00766 |
| TC0700001624.mm.1 | <a href="#">Wee1</a>   | WEE 1 homolog 1 (S. pombe)                                     | 7.15 ± 0.11        | 7.7 ± 0.08  | 6.68 ± 0.03 | 7.21 ± 0.04 | 0.00011              | 4.4E-06  | 0.4443  |
| TC0800001425.mm.1 | <a href="#">Wfdc1</a>  | WAP four-disulfide core domain 1                               | 9.23 ± 0.18        | 9.54 ± 0.08 | 9.5 ± 0.11  | 9.06 ± 0.11 | 0.62714              | 0.84086  | 0.00931 |
| TC1100001264.mm.1 | <a href="#">Wfdc17</a> | WAP four-disulfide core domain 17                              | 6.5 ± 0.07         | 6.03 ± 0.14 | 6.33 ± 0.16 | 5.83 ± 0.03 | 0.13722              | 0.00072  | 0.78755 |
| TC1000001620.mm.1 | <a href="#">Wlbg</a>   | within bgcn homolog (Drosophila)                               | 6.56 ± 0.04        | 6.69 ± 0.02 | 6.72 ± 0.03 | 6.75 ± 0.02 | 0.00281              | 0.01998  | 0.12729 |
| TC1000001490.mm.1 | <a href="#">Wif1</a>   | Wnt inhibitory factor 1                                        | 5.9 ± 0.07         | 6.35 ± 0.11 | 6.2 ± 0.05  | 6.27 ± 0.1  | 0.23137              | 0.00926  | 0.04716 |
| TC0500001717.mm.1 | <a href="#">Wipi2</a>  | WD repeat domain, phosphoinositide interacting 2               | 8.06 ± 0.04        | 7.99 ± 0.04 | 7.94 ± 0.03 | 8.1 ± 0.06  | 0.5885               | 0.59156  | 0.00848 |
| TC1500000489.mm.1 | <a href="#">Wisp1</a>  | WNT1 inducible signaling pathway protein 1                     | 6.66 ± 0.04        | 6.64 ± 0.01 | 6.87 ± 0.09 | 6.54 ± 0.05 | 0.2099               | 0.01168  | 0.00808 |
| TC0200002496.mm.1 | <a href="#">Wisp2</a>  | WNT1 inducible signaling pathway protein 2                     | 9.08 ± 0.12        | 9.05 ± 0.07 | 9.38 ± 0.17 | 8.6 ± 0.08  | 0.74849              | 0.00873  | 0.00491 |
| TC0600003030.mm.1 | <a href="#">Wnk1</a>   | WNK lysine deficient protein kinase 1                          | 9.41 ± 0.03        | 9.29 ± 0.03 | 9.38 ± 0.03 | 9.24 ± 0.07 | 0.46629              | 0.00976  | 0.5779  |
| TC0600001902.mm.1 | <a href="#">Wnt2</a>   | wingless-related MMTV integration site 2                       | 5.42 ± 0.02        | 5.5 ± 0.01  | 5.57 ± 0.04 | 5.46 ± 0.02 | 0.07379              | 0.45471  | 0.00316 |
| TC1100003318.mm.1 | <a href="#">Wsb1</a>   | WD repeat and SOCS box-containing 1                            | 6.9 ± 0.07         | 6.98 ± 0.07 | 7.31 ± 0.12 | 6.76 ± 0.12 | 0.43187              | 0.02028  | 0.00822 |
| TC0500001205.mm.1 | <a href="#">Wscd2</a>  | WSC domain containing 2                                        | 6.71 ± 0.06        | 6.99 ± 0.05 | 6.89 ± 0.04 | 6.88 ± 0.03 | 0.47271              | 0.01251  | 0.00766 |
| TC0400002271.mm.1 | <a href="#">Wwp1</a>   | WW domain containing E3 ubiquitin protein ligase 1             | 9.35 ± 0.05        | 9.08 ± 0.06 | 9.31 ± 0.04 | 9.07 ± 0.08 | 0.68617              | 0.00066  | 0.90386 |
| TC0300002025.mm.1 | <a href="#">Wwtr1</a>  | WW domain containing transcription regulator 1                 | 8.89 ± 0.05        | 8.94 ± 0.01 | 9.07 ± 0.06 | 8.83 ± 0.03 | 0.39802              | 0.04792  | 0.00471 |
| TC1700002526.mm.1 | <a href="#">Xdh</a>    | xanthine dehydrogenase                                         | 9.02 ± 0.06        | 8.6 ± 0.07  | 8.65 ± 0.03 | 8.58 ± 0.08 | 0.01101              | 0.00301  | 0.0237  |



Supplemental Table I

| Probe Set ID      | Symbol                  | Annotations<br>Description                                     | Summary Statistics |              |              |              | 2 way ANOVA p-values |          |         |
|-------------------|-------------------------|----------------------------------------------------------------|--------------------|--------------|--------------|--------------|----------------------|----------|---------|
|                   |                         |                                                                | XY sh              | XY Or        | XX sh        | XX Or        | XY vs XX             | Sh vs Or | Intrxn  |
| TC0X00002775.mm.1 | <a href="#">Xist</a>    | inactive X specific transcripts                                | 4.19 ± 0.02        | 4.24 ± 0.04  | 9.88 ± 0.09  | 9.84 ± 0.12  | 1E-16                | 0.94263  | 0.53769 |
| TC1700000882.mm.1 | <a href="#">Xpo5</a>    | exportin 5                                                     | 7.58 ± 0.02        | 7.53 ± 0.03  | 7.47 ± 0.03  | 7.41 ± 0.06  | 0.00511              | 0.15642  | 0.94547 |
| TC1300002395.mm.1 | <a href="#">Xrcc4</a>   | X-ray repair complementing defective repair in Chinese hamster | 5.43 ± 0.04        | 5.57 ± 0.04  | 5.54 ± 0.04  | 5.4 ± 0.06   | 0.50965              | 0.99691  | 0.00752 |
| TC1600001471.mm.1 | <a href="#">Xylyt1</a>  | xyloside xylosyltransferase 1                                  | 7.01 ± 0.02        | 7.17 ± 0.01  | 7.15 ± 0.03  | 7.08 ± 0.01  | 0.23275              | 0.07338  | 7.1E-05 |
| TC0400001515.mm.1 | <a href="#">Yars</a>    | tyrosyl-tRNA synthetase                                        | 6.93 ± 0.04        | 6.83 ± 0.03  | 6.74 ± 0.02  | 6.75 ± 0.03  | 0.0009               | 0.26219  | 0.14249 |
| TC0600003268.mm.1 | <a href="#">Ybx3</a>    | Y box protein 3                                                | 10.27 ± 0.07       | 10.17 ± 0.01 | 10.31 ± 0.01 | 10.13 ± 0.03 | 0.78823              | 0.0072   | 0.55506 |
| TC1100003462.mm.1 | <a href="#">Ypel2</a>   | yippee-like 2 (Drosophila)                                     | 7.98 ± 0.05        | 8.03 ± 0.05  | 8.3 ± 0.04   | 8.04 ± 0.03  | 0.00498              | 0.02384  | 0.01056 |
| TC0200005425.mm.1 | <a href="#">Ythdf1</a>  | YTH domain family 1                                            | 8 ± 0.01           | 8.05 ± 0.03  | 7.99 ± 0.02  | 7.92 ± 0.02  | 0.00278              | 0.70099  | 0.00946 |
| TC0500003410.mm.1 | <a href="#">Ywhag</a>   | tyrosine 3-monooxygenase/tryptophan 5-monooxygenase act        | 7.75 ± 0.13        | 7.56 ± 0.09  | 7.36 ± 0.11  | 7.81 ± 0.04  | 0.3772               | 0.31563  | 0.00585 |
| TC0100000255.mm.1 | <a href="#">Zap70</a>   | zeta-chain (TCR) associated protein kinase                     | 5.55 ± 0.03        | 5.79 ± 0.03  | 5.67 ± 0.03  | 5.75 ± 0.07  | 0.4426               | 0.0032   | 0.11281 |
| TC0400003795.mm.1 | <a href="#">Zbtb40</a>  | zinc finger and BTB domain containing 40                       | 6.32 ± 0.02        | 6.42 ± 0.02  | 6.32 ± 0.02  | 6.34 ± 0     | 0.0411               | 0.00805  | 0.05777 |
| TC0900002296.mm.1 | <a href="#">Zc3h12c</a> | zinc finger CCCH type containing 12C                           | 7.19 ± 0.04        | 7.35 ± 0.01  | 7.28 ± 0.04  | 7.13 ± 0.06  | 0.18588              | 0.96633  | 0.00411 |
| TC1000000056.mm.1 | <a href="#">Zc3h12d</a> | zinc finger CCCH type containing 12D                           | 5.92 ± 0.06        | 6.2 ± 0.03   | 6.01 ± 0.1   | 6.21 ± 0.08  | 0.63484              | 0.00823  | 0.77328 |
| TC0700000225.mm.1 | <a href="#">Zc3h4</a>   | zinc finger CCCH-type containing 4                             | 7.99 ± 0.02        | 8.04 ± 0.01  | 8.1 ± 0.03   | 7.99 ± 0.04  | 0.23772              | 0.26063  | 0.00887 |
| TC1500000729.mm.1 | <a href="#">Zc3h7b</a>  | zinc finger CCCH type containing 7B                            | 8.35 ± 0.04        | 8.46 ± 0.02  | 8.48 ± 0.03  | 8.4 ± 0.03   | 0.33197              | 0.54936  | 0.00873 |
| TC1300002416.mm.1 | <a href="#">Zcchc9</a>  | zinc finger, CCHC domain containing 9                          | 6.54 ± 0.05        | 6.65 ± 0.04  | 6.62 ± 0.03  | 6.44 ± 0.05  | 0.14538              | 0.34763  | 0.00588 |
| TC1700000036.mm.1 | <a href="#">Zdhc14</a>  | zinc finger, DHHC domain containing 14                         | 7.53 ± 0.05        | 7.47 ± 0.03  | 7.34 ± 0.02  | 7.34 ± 0.06  | 0.00718              | 0.84282  | 0.91464 |
| TC0100000653.mm.1 | <a href="#">Zfand2b</a> | zinc finger, AN1 type domain 2B                                | 6.91 ± 0.02        | 7 ± 0.01     | 7.03 ± 0.03  | 7.08 ± 0.04  | 0.00507              | 0.03384  | 0.70067 |
| TC1000001328.mm.1 | <a href="#">Zfc3h1</a>  | zinc finger, C3H1-type containing                              | 7.53 ± 0.05        | 7.33 ± 0.04  | 7.53 ± 0.07  | 7.18 ± 0.14  | 0.40541              | 0.00497  | 0.35127 |
| TC0300000017.mm.1 | <a href="#">Zfx4</a>    | zinc finger homeodomain 4                                      | 6.53 ± 0.03        | 6.28 ± 0.05  | 6.41 ± 0.05  | 6.39 ± 0.03  | 0.85416              | 0.00402  | 0.01207 |
| TC0500001727.mm.1 | <a href="#">Zfp12</a>   | zinc finger protein 12                                         | 6.69 ± 0.03        | 6.78 ± 0.01  | 6.77 ± 0.04  | 6.67 ± 0.02  | 0.80845              | 0.90447  | 0.00357 |
| TC1700001595.mm.1 | <a href="#">Zfp13</a>   | zinc finger protein 13                                         | 6.89 ± 0.03        | 6.93 ± 0.01  | 7.03 ± 0.04  | 6.89 ± 0.01  | 0.04164              | 0.14808  | 0.00257 |
| TC1600000014.mm.1 | <a href="#">Zfp174</a>  | zinc finger protein 174                                        | 5.59 ± 0.02        | 5.65 ± 0.02  | 5.66 ± 0.02  | 5.58 ± 0.02  | 0.96827              | 0.52079  | 0.00387 |
| TC0600000542.mm.1 | <a href="#">Zfp212</a>  | Zinc finger protein 212                                        | 7.05 ± 0.04        | 7.2 ± 0.02   | 7.19 ± 0.01  | 7.1 ± 0.05   | 0.46999              | 0.29144  | 0.00326 |
| TC1600000009.mm.1 | <a href="#">Zfp263</a>  | zinc finger protein 263                                        | 6.35 ± 0.03        | 6.45 ± 0.02  | 6.4 ± 0.01   | 6.35 ± 0.02  | 0.29731              | 0.19245  | 0.00647 |
| TC0600000540.mm.1 | <a href="#">Zfp282</a>  | zinc finger protein 282                                        | 6.51 ± 0.03        | 6.64 ± 0.04  | 6.64 ± 0.03  | 6.58 ± 0.03  | 0.17496              | 0.15559  | 0.00476 |
| TC0700000534.mm.1 | <a href="#">Zfp30</a>   | zinc finger protein 30                                         | 6.39 ± 0.03        | 6.46 ± 0.02  | 6.6 ± 0.03   | 6.41 ± 0.03  | 0.0222               | 0.02817  | 0.00101 |
| TC1300001128.mm.1 | <a href="#">Zfp366</a>  | zinc finger protein 366                                        | 7.14 ± 0.08        | 7.35 ± 0.06  | 7.06 ± 0.08  | 7.43 ± 0.11  | 0.764                | 0.00906  | 0.24893 |
| TC1200001988.mm.1 | <a href="#">Zfp361</a>  | zinc finger protein 36, C3H type-like 1                        | 9.07 ± 0.06        | 9.23 ± 0.07  | 9.65 ± 0.07  | 9.15 ± 0.09  | 0.00682              | 0.01954  | 0.0008  |
| TC0700000539.mm.1 | <a href="#">Zfp383</a>  | zinc finger protein 383                                        | 6.45 ± 0.03        | 6.63 ± 0.03  | 6.51 ± 0.05  | 6.48 ± 0.01  | 0.27178              | 0.03226  | 0.00526 |
| TC1400000935.mm.1 | <a href="#">Zfp395</a>  | zinc finger protein 395                                        | 7.48 ± 0.03        | 7.55 ± 0.06  | 7.67 ± 0.03  | 7.63 ± 0.01  | 0.00517              | 0.99228  | 0.24636 |
| TC1800000875.mm.1 | <a href="#">Zfp516</a>  | zinc finger protein 516                                        | 7.13 ± 0.05        | 7.32 ± 0.02  | 7.5 ± 0.05   | 7.24 ± 0.04  | 0.01343              | 0.28345  | 0.00048 |

Supplemental Table I

| Probe Set ID      | Symbol                      | Annotations<br>Description                | Summary Statistics |             |             |             | 2 way ANOVA p-values |          |         |
|-------------------|-----------------------------|-------------------------------------------|--------------------|-------------|-------------|-------------|----------------------|----------|---------|
|                   |                             |                                           | XY sh              | XY Or       | XX sh       | XX Or       | XY vs XX             | Sh vs Or | Intrxn  |
| TC0400003995.mm.1 | <a href="#">Zfp534</a>      | zinc finger protein 534                   | 4.73 ± 0.03        | 4.83 ± 0.03 | 4.81 ± 0.03 | 4.68 ± 0.05 | 0.3638               | 0.8427   | 0.00511 |
| TC0400003732.mm.1 | <a href="#">Zfp593</a>      | zinc finger protein 593                   | 5.62 ± 0.02        | 5.73 ± 0.01 | 5.77 ± 0.04 | 5.79 ± 0.03 | 0.00298              | 0.056    | 0.18073 |
| TC1600001107.mm.1 | <a href="#">Zfp597</a>      | zinc finger protein 597                   | 6.17 ± 0.01        | 6.19 ± 0.02 | 6.12 ± 0.02 | 6.1 ± 0.03  | 0.00408              | 0.90276  | 0.28742 |
| TC0700002594.mm.1 | <a href="#">Zfp61</a>       | zinc finger protein 61                    | 5.4 ± 0.01         | 5.47 ± 0.02 | 5.45 ± 0.02 | 5.43 ± 0.01 | 0.60272              | 0.11395  | 0.00347 |
| TC0900001625.mm.1 | <a href="#">Zfp651</a>      | zinc finger protein 651                   | 8.14 ± 0.1         | 8.42 ± 0.01 | 8.44 ± 0.06 | 8.22 ± 0.04 | 0.38482              | 0.53725  | 0.00256 |
| TC0300002460.mm.1 | <a href="#">Zfp687</a>      | zinc finger protein 687                   | 6.78 ± 0.01        | 6.83 ± 0.03 | 6.89 ± 0.01 | 6.9 ± 0.02  | 0.0012               | 0.12898  | 0.35787 |
| TC0300001626.mm.1 | <a href="#">Zfp704</a>      | zinc finger protein 704                   | 7.94 ± 0.09        | 8.25 ± 0.03 | 8.25 ± 0.05 | 8.07 ± 0.04 | 0.27371              | 0.24476  | 0.00192 |
| TC1300002321.mm.1 | <a href="#">Zfp72</a>       | zinc finger protein 72                    | 7.13 ± 0.06        | 7.37 ± 0.08 | 7.46 ± 0.09 | 7.08 ± 0.14 | 0.92465              | 0.40699  | 0.00674 |
| TC0600002217.mm.1 | <a href="#">Zfp746</a>      | zinc finger protein 746                   | 7.08 ± 0.03        | 7.19 ± 0.02 | 7.21 ± 0.03 | 7.11 ± 0.03 | 0.36033              | 0.86646  | 0.00668 |
| TC0700004324.mm.1 | <a href="#">Zfp747</a>      | zinc finger protein 747                   | 7.07 ± 0.05        | 7.19 ± 0.03 | 7.21 ± 0.04 | 7.01 ± 0.05 | 0.86356              | 0.76578  | 0.00192 |
| TC0600002216.mm.1 | <a href="#">Zfp777</a>      | zinc finger protein 777                   | 6.94 ± 0.03        | 7.04 ± 0.01 | 7.06 ± 0.01 | 7.08 ± 0.03 | 0.0025               | 0.01805  | 0.07184 |
| TC0700000753.mm.1 | <a href="#">Zfp936</a>      | zinc finger protein 936                   | 5.9 ± 0.05         | 6 ± 0.03    | 6.04 ± 0.04 | 5.87 ± 0.06 | 0.63933              | 0.61864  | 0.00828 |
| TC1900000612.mm.1 | <a href="#">Zfyve27</a>     | zinc finger, FYVE domain containing 27    | 6.83 ± 0.01        | 6.85 ± 0.01 | 6.82 ± 0.01 | 6.9 ± 0.03  | 0.28392              | 0.00419  | 0.15191 |
| TC1400002253.mm.1 | <a href="#">ZNRD1-AS1_2</a> | ZNRD1 antisense RNA 1 conserved region 2  | 4.33 ± 0.04        | 4.65 ± 0.09 | 4.35 ± 0.1  | 4.63 ± 0.13 | 0.88367              | 0.00855  | 0.97187 |
| TC1800001072.mm.1 | <a href="#">Zscan30</a>     | zinc finger and SCAN domain containing 30 | 4.91 ± 0.04        | 4.96 ± 0.02 | 5.06 ± 0.04 | 4.91 ± 0.02 | 0.13038              | 0.26583  | 0.00848 |
| TC0200002534.mm.1 | <a href="#">Zswim3</a>      | zinc finger SWIM-type containing 3        | 6.07 ± 0.02        | 6 ± 0.03    | 6.21 ± 0.05 | 6.14 ± 0.03 | 0.00108              | 0.05451  | 0.92661 |
| TC0900000590.mm.1 | <a href="#">Zw10</a>        | zw10 kinetochore protein                  | 6.68 ± 0.07        | 6.65 ± 0.03 | 6.57 ± 0.01 | 6.43 ± 0.07 | 0.00976              | 0.20774  | 0.21809 |
| TC0600000459.mm.1 | <a href="#">Zyx</a>         | zyxin                                     | 8.83 ± 0.13        | 9.09 ± 0.08 | 9.17 ± 0.08 | 8.83 ± 0.06 | 0.56799              | 0.81291  | 0.00753 |

**Supplemental Table II. Primer sequences for RT-PCR.**

| <b>Gene</b> | <b>Primer sequence</b>                                                      |
|-------------|-----------------------------------------------------------------------------|
| ACE         | Forward: 5'-AGGTTGGGCTACTCCAGGAC-3'<br>Reverse: 5'-GGTGAGTGTTGTCTGGCTTC-3'  |
| MMP2        | Forward: 5'-GGGGTCCATTTTCTTCTTCA-3'<br>Reverse: 5'-CCAGCAAGTAGATGCTGCCT-3'  |
| Collagen1   | Forward: 5'-GCTCCTCTTAGGGGCCACT-3'<br>Reverse: 5'-CCACGTCTCACCATTGGGG-3'    |
| Thbs1       | Forward: 5'-CAATTTTCAGGGGGGTGCTGC-3'<br>Reverse: 5'-CCGTTACCCACGTTGTTGTC-3' |
| Xist        | Purchased from QIAGEN catalog#330001 PPM68756B                              |
| Kap         | Purchased from QIAGEN catalog#QT00113484                                    |
| Cyp2e1      | Purchased from QIAGEN catalog#QT02280278                                    |
| Arntl       | Purchased from QIAGEN catalog#QT00101647                                    |
| Npas2       | Purchased from QIAGEN catalog#QT00108647                                    |

**Supplemental table III**

| <b>Genes Upregulated in XY</b> | <b>Genes Upregulated in XX</b> |
|--------------------------------|--------------------------------|
| Ddx3y                          | Xist                           |
| Uty                            | Arntl                          |
| Kdm5d                          | Npas2                          |
| Eif2s3y                        | Arhgap20                       |
| Dbp                            | Ighv14-1                       |
| Nr1d2                          |                                |
| Nr1d1                          |                                |
| Cyp2e1                         |                                |
| Cidec                          |                                |
| Fam13a                         |                                |
| Ehhadh                         |                                |
| Slc27a2                        |                                |
| Npy                            |                                |
| Ms4a4a                         |                                |
| Kap                            |                                |
| Dbh                            |                                |
| Snap25                         |                                |
| Pck1                           |                                |
| Atp1b1                         |                                |
| Gnal                           |                                |
| Syt1                           |                                |
| Htr3a                          |                                |
| Slc18a2                        |                                |
| Th                             |                                |
| Tubb3                          |                                |
| Tuba4a                         |                                |
| Ache                           |                                |
| Syt4                           |                                |
| Kcna1                          |                                |
| Gatm                           |                                |
| Ddc                            |                                |
| Slc31a1                        |                                |
| Cdh19                          |                                |
| Napb                           |                                |
| Vat1l                          |                                |
| Nefl                           |                                |
| Slc6a2                         |                                |
| Syn2                           |                                |
| Plp1                           |                                |
| Kif21a                         |                                |
| Chl1                           |                                |
| Pirt                           |                                |
| Drd2                           |                                |

|            |  |
|------------|--|
| Cxcl13     |  |
| Tspan8     |  |
| Snord116l2 |  |
| Stmn2      |  |
| Necab1     |  |
| Mpz        |  |
| Snord116   |  |
| Fabp7      |  |

## Supplemental Table IV.

### Upregulated in XY compared to XX

1. Polyamine biosynthetic process (4 genes): Amd2, Azin1, Odc1, Srm
2. Nuclear pore (6 genes): Ipo7, Kpna1, Kpna2, Nup50, Nup88, Nup93
3. Purine ribonucleotide binding (31 genes): Abcf2, Atp2b1, Baz1b, Btaf1, Cars, Cct2, Cct3, Cdk6, Ctps, Ddx21, Ddx3y, Dgkg, Eif2s3y, Eif4a1, Gnai1, Gnl3, Hsp90ab1, Hspa4, Iars, Ide, Insr, Map2k3, Map3k6, Mat2a, Psmc5, Rras2, Sar1a, Sgk1, Srp54a, Srp54b, Srp54c
4. tRNA binding (4 Genes): Cars, Mettl1, Xpo5, Yars
5. Nuclear lumen (16 genes) Ccnl2, Cfl2, Ddx21, Gnl3, Mbd1, Nop2, Nop56, Polr2l, Pop4, Psmc5, Sfpq, Srp54a, Srp54b, Srp54c, Srp72, Srrt
6. Nucleolus (8 genes): Ddx21, Gnl3, Mbd1, Nop2, Nop56, Pop4, Srp72, Wdr74
7. Transition metal ion binding (32 genes): Adamts1, Adamts9, B4galt4, B4galt5, Baz1b, Cars, Dgkg, Dnaja2, Galnt11, Galnt7, Herc2, Iars, Ide, Kdm5d, Klf13, Klf9, Luc7l, Mat2a, Mbd1, Mbnl2, Nr4a3, P4ha1, Polr2l, Prnp, Sec23b, Slc30a1, Spire1, Sqstm1, Ubr2, Uty, Zdhhc14, Zfp597
8. Protein amino acid N-linked glycosylation (3 genes): Mgat2, Prkcsh, Stt3b
9. Extracellular matrix part (7 genes): Ccdc80, Col1a1, Col1a2, Col4a1, Col5a2, Lamc1, Sparc
10. Immune response (7 genes): Ccl6, Ccl9, Cfb, Fcgr2b, Fcgr3, Il31ra, Tlr13
11. Acute inflammatory response (4 genes): Cd163, Cfb, Fcgr3, Stat3
12. Skin development (3 genes): Aars, Col1a1, Col5a2
13. Defense response (6 genes): Cd163, Cfb, Fcgr2b, Fcgr3, Stat3, Tlr13
14. Melanosome (3 genes): Pdia4, Pdia6, Snd1

### Upregulated in XX compared to XY

1. Ribosome (8 genes): Mrpl23, Mrpl52, Rpl18a, Rpl36, Rplp1, Rplp2, Rps10, Ubc
2. DNA binding (20 genes): Arap1, Ddx3x, Ercc2, Foxd1, Gli1, Kcnip3, Kdm5c, Msx1, Nr1h2, Nr3c2, Pold2, Polr2e, Polr2f, Relb, Sry, Stra13, Thap3, Zfp395, Zfp593, Zfp687
3. Intracellular non-membrane-bounded organelle (18 genes): Arhgap6, Camk2n1, Cdk5rap2, Eml2, Fgd1, Grm3, Homer3, Ifltd1, Myl6, Nudt16, Pdlim2, Rpl13, Rpl35a, Rpl37a, Rps16, Sntg2, Ssh3, Ttf1
4. Positive regulation of macromolecule metabolic process (8 genes): C1qtnf2, Jun, Pawr, Pax1, Pias3, Rarg, Six4, Ttf1
5. Postsynaptic density (3 genes): Camk2n1, Grm3, Homer3
6. Structural constituent of ribosome (4 genes): Rpl13, Rpl35a, Rpl37a, Rps16
7. Death (6 genes): Dapk2, Pawr, Pcdcd7, Serpinb9b, Spr, Traf2
8. Regulation of cell proliferation (6 genes): Ada, Jun, Pawr, Rarg, Six5, Wnt2



**Supplemental Table V. Characteristics of XY and XX male *Ldlr*<sup>-/-</sup> mice infused with AngII.**

|                                                | <b>XY Sham</b> | <b>XY ORC</b>  | <b>XX sham</b> | <b>XX ORC</b>  |
|------------------------------------------------|----------------|----------------|----------------|----------------|
| <b>Body weight (g)</b>                         | 28.6 ± 1       | 23.9 ± 0.6 **  | 31.3 ± 1       | 28.3 ± 0.8 **  |
| <b>Serum testosterone (ng/ml)</b>              | 1.77 ± 0.85    | 0.07 ± 0.02 ** | 1.53 ± 0.64    | 0.14 ± 0.02 ** |
| <b>Plasma Renin Concentration (ng/ml)</b>      | 0.37 ± 0.16    | 0.32 ± 0.09    | 0.25 ± 0.04    | 0.29 ± 0.05    |
| <b>Total serum cholesterol (mg/dl)</b>         | 1617 ± 242     | 1450 ± 320     | 1797 ± 140     | 1670 ± 115     |
| <b>Systolic blood pressure (mmHg)</b>          | 132 ± 3        | 135 ± 4        | 119 ± 4 *      | 135 ± 3 **     |
| <b>% Atherosclerotic lesion in aortic arch</b> | 21 ± 2         | 20 ± 3         | 19 ± 3         | 17 ± 2         |

Data are mean ± SEM from n = 9-20/group.

\*, P<0.05 compared to XY within surgical treatment.

\*\*, P<0.05 compared to sham within genotype.
