# Supplementary material
Source: PubMed Central journal article supplement (PMC5864127)

**XY**

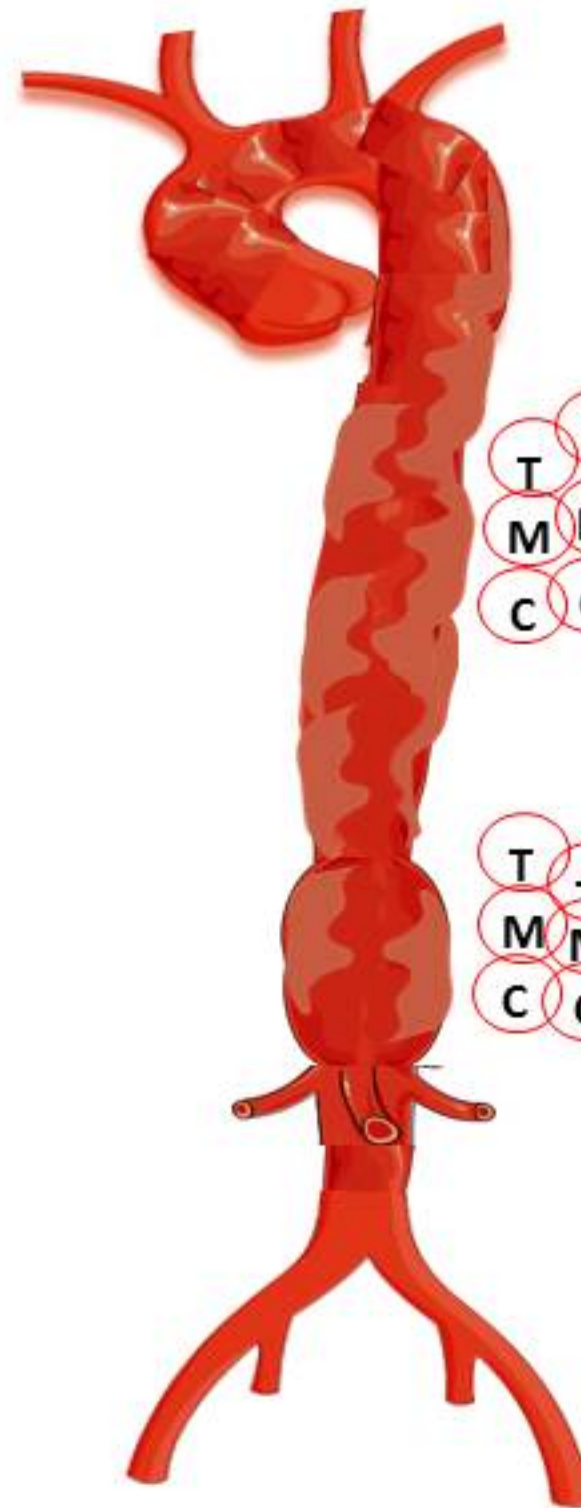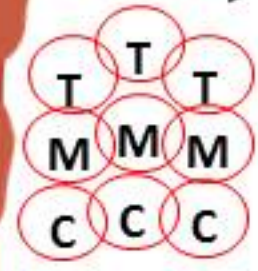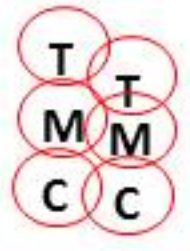

**AngII**

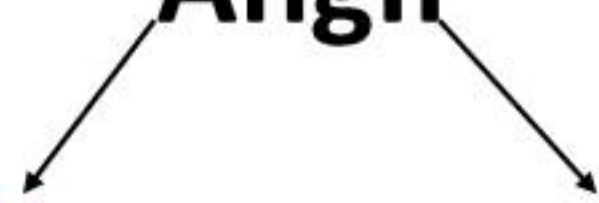

**XX**

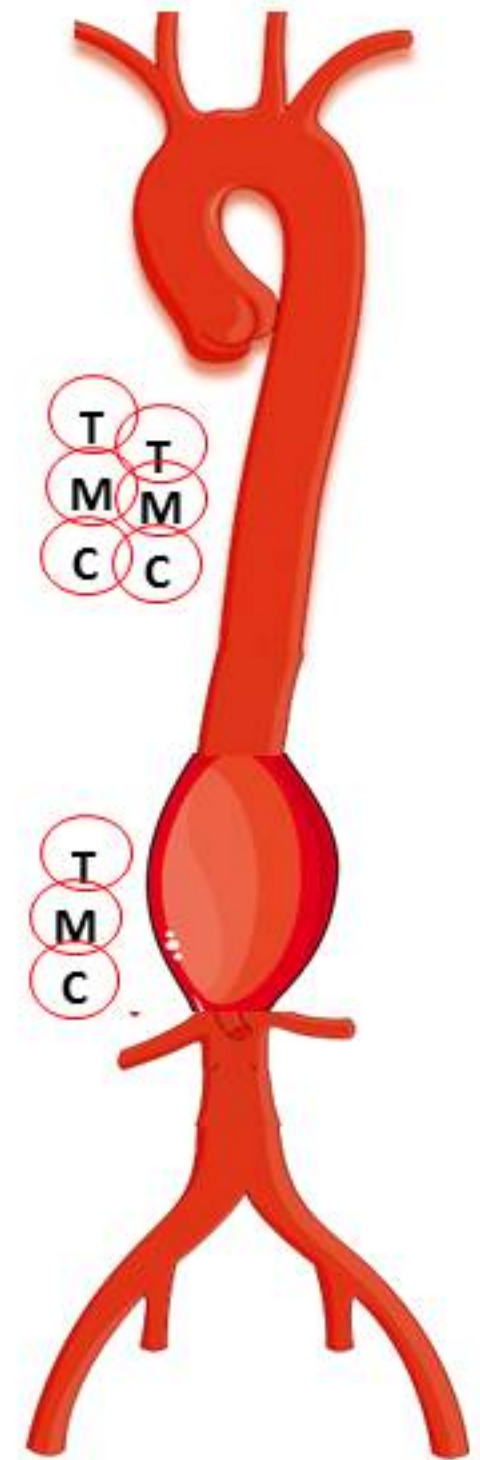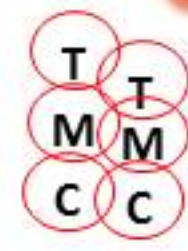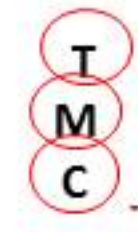

T: Thrombospondin1  
M: MMP2  
C: Collagen1

Supplement: NIHMS914744-supplement-Graphic_Abstract.pdf [file NIHMS914744-supplement-Graphic_Abstract.pdf]
